# Supplementary material for: Analysis of COMPASS, a New Comprehensive Plasmid Database Revealed Prevalence of Multireplicon and Extensive Diversity of IncF Plasmids
Source: Front Microbiol. 2020 Mar 24;11:483. doi: 10.3389/fmicb.2020.00483 (PMC7105883; doi:10.3389/fmicb.2020.00483)
Supplement: TABLE S4 — Description of COMPASS metadata. [file Table_4.XLSX]

## Sheet: COMPASS_Description
#	Accession	Topology	Size	Superkingdom	Phylum	Class	Order	Family	Genus	Species	Description	collected_by	collection_date	country	db_xref	genotype	host	isolation_source	lat_lon	mol_type	organism	plasmid	strain	serovar	sub_species	subtype	isolate	note	identified_by	culture_collection	serotype	type_material	clone	altitude	biovar	pathovar	lab_host	environmental_sample	sub_strain	synonym	specimen_voucher	common	serogroup	type	subgroup	tissue_type	biotype	group	dev_stage
1	AB007909.1	circular	6868	Bacteria	Actinobacteria	Actinobacteria	Propionibacteriales	Propionibacteriaceae	Acidipropionibacterium	Acidipropionibacterium acidipropionici	Propionibacterium acidi-propionici (strain:E214) plasmid pRGO1, complete sequence	NA	NA	NA	taxon:1748	NA	NA	NA	NA	genomic DNA	Acidipropionibacterium acidipropionici	pRGO1	E214	NA	NA	NA	NA	NA	NA	NA	NA	NA	NA	NA	NA	NA	NA	NA	NA	NA	NA	NA	NA	NA	NA	NA	NA	NA	NA
2	AB024514.1	circular	2295	Bacteria	Firmicutes	Bacilli	Lactobacillales	Lactobacillaceae	Lactobacillus	Lactobacillus plantarum	Lactobacillus plantarum plasmid pLTK2, complete sequence	NA	NA	NA	taxon:1590	NA	NA	NA	NA	genomic DNA	Lactobacillus plantarum	pLTK2	L137	NA	NA	NA	NA	NA	NA	NA	NA	NA	NA	NA	NA	NA	NA	NA	NA	NA	NA	NA	NA	NA	NA	NA	NA	NA	NA
3	AB079380.1	circular	7344	Bacteria	Firmicutes	Bacilli	Lactobacillales	Streptococcaceae	Lactococcus	Lactococcus lactis	Lactococcus lactis subsp. lactis bv. diacetylactis cryptic plasmid pDR1-1B, complete sequence	NA	NA	NA	taxon:44688	NA	NA	NA	NA	genomic DNA	Lactococcus lactis subsp. lactis bv. diacetylactis	cryptic plasmid pDR1-1B	DRC1	NA	lactis	NA	NA	biovar: diacetylactis	NA	NA	NA	NA	NA	NA	NA	NA	NA	NA	NA	NA	NA	NA	NA	NA	NA	NA	NA	NA	NA
4	AB109805.1	circular	8124	Bacteria	Proteobacteria	Gammaproteobacteria	Pasteurellales	Pasteurellaceae	Actinobacillus	Actinobacillus pleuropneumoniae	Actinobacillus pleuropneumoniae plasmid pMS260, complete sequence	NA	NA	Japan	taxon:715	NA	NA	NA	NA	genomic DNA	Actinobacillus pleuropneumoniae	pMS260	NA	NA	NA	NA	NA	NA	NA	NA	NA	NA	NA	NA	NA	NA	NA	NA	NA	NA	NA	NA	NA	NA	NA	NA	NA	NA	NA
5	AB116387.1	circular	3741	Bacteria	Proteobacteria	Alphaproteobacteria	Rhodospirillales	Rhodospirillaceae	Magnetospirillum	Magnetospirillum magneticum	Magnetospirillum magneticum plasmid pMGT, complete sequence	NA	NA	NA	taxon:84159	NA	NA	NA	NA	genomic DNA	Magnetospirillum magneticum	pMGT	MGT-1	NA	NA	NA	NA	NA	NA	NA	NA	NA	NA	NA	NA	NA	NA	NA	NA	NA	NA	NA	NA	NA	NA	NA	NA	NA	NA
6	AB118106.1	circular	23381	Bacteria	Firmicutes	Bacilli	Lactobacillales	Lactobacillaceae	Lactobacillus	Lactobacillus brevis	Lactobacillus brevis plasmid pRH45II, complete sequence	NA	NA	Japan	taxon:1580	NA	NA	NA	NA	genomic DNA	Lactobacillus brevis	pRH45II	ABBC45	NA	NA	NA	NA	NA	NA	NA	NA	NA	NA	NA	NA	NA	NA	NA	NA	NA	NA	NA	NA	NA	NA	NA	NA	NA	NA
7	AB193120.1	circular	8696	Bacteria	Proteobacteria	Betaproteobacteria	Neisseriales	Neisseriaceae	Eikenella	Eikenella corrodens	Eikenella corrodens plasmid pMU1, complete sequence	NA	NA	NA	taxon:539	NA	NA	NA	NA	genomic DNA	Eikenella corrodens	pMU1	1073	NA	NA	NA	NA	NA	NA	NA	NA	NA	NA	NA	NA	NA	NA	NA	NA	NA	NA	NA	NA	NA	NA	NA	NA	NA	NA
8	AB211496.1	circular	3634	Bacteria	Proteobacteria	Epsilonproteobacteria	Campylobacterales	Campylobacteraceae	Campylobacter	Campylobacter lari	Campylobacter lari plasmid pCL300, complete sequence	NA	NA	NA	taxon:201	NA	NA	NA	NA	genomic DNA	Campylobacter lari	pCL300	300	NA	NA	NA	NA	U.S.A	NA	NA	NA	NA	NA	NA	NA	NA	NA	NA	NA	NA	NA	NA	NA	NA	NA	NA	NA	NA	NA
9	AB534719.1	circular	4328	Bacteria	Proteobacteria	Alphaproteobacteria	Sphingomonadales	Sphingomonadaceae	Sphingopyxis	Sphingopyxis macrogoltabida	Sphingopyxis macrogoltabida plasmid pSM103mini, complete sequence	NA	NA	NA	taxon:33050	NA	NA	NA	NA	genomic DNA	Sphingopyxis macrogoltabida	pSM103mini	103	NA	NA	NA	NA	NA	NA	NA	NA	NA	NA	NA	NA	NA	NA	NA	NA	NA	NA	NA	NA	NA	NA	NA	NA	NA	NA
10	AE001272.1	circular	60232	Bacteria	Firmicutes	Bacilli	Lactobacillales	Streptococcaceae	Lactococcus	Lactococcus lactis	Lactococcus lactis strain DPC3147 plasmid pMRC01, complete sequence	NA	NA	NA	taxon:1358	NA	NA	NA	NA	genomic DNA	Lactococcus lactis	pMRC01	DPC3147	NA	NA	NA	NA	NA	NA	NA	NA	NA	NA	NA	NA	NA	NA	NA	NA	NA	NA	NA	NA	NA	NA	NA	NA	NA	NA
11	AE002565.1	circular	36804	Bacteria	Firmicutes	Bacilli	Lactobacillales	Enterococcaceae	Enterococcus	Enterococcus faecalis	Enterococcus faecalis plasmid pAM373, complete sequence	NA	NA	NA	taxon:1351	NA	NA	NA	NA	genomic DNA	Enterococcus faecalis	pAM373	NA	NA	NA	NA	NA	NA	NA	NA	NA	NA	NA	NA	NA	NA	NA	NA	NA	NA	NA	NA	NA	NA	NA	NA	NA	NA	NA
12	AE007872.2	circular	542868	Bacteria	Proteobacteria	Alphaproteobacteria	Rhizobiales	Rhizobiaceae	Agrobacterium	Agrobacterium fabrum	Agrobacterium tumefaciens str. C58 plasmid At, complete sequence	NA	NA	NA	taxon:176299	NA	NA	NA	NA	genomic DNA	Agrobacterium fabrum str. C58	At	C58	NA	NA	NA	NA	NA	NA	ATCC:33970	NA	NA	NA	NA	NA	NA	NA	NA	NA	NA	NA	NA	NA	NA	NA	NA	NA	NA	NA
13	AE011191.1	circular	94829	Bacteria	Firmicutes	Bacilli	Bacillales	Bacillaceae	Bacillus	Bacillus anthracis	Bacillus anthracis str. A2012 plasmid pXO2, complete sequence	NA	NA	NA	taxon:191218	NA	NA	NA	NA	genomic DNA	Bacillus anthracis str. A2012	pXO2	A2012	NA	NA	NA	NA	Florida strain	NA	NA	NA	NA	NA	NA	NA	NA	NA	NA	NA	NA	NA	NA	NA	NA	NA	NA	NA	NA	NA
14	AE016855.1	circular	73661	Bacteria	Proteobacteria	Gammaproteobacteria	Pseudomonadales	Pseudomonadaceae	Pseudomonas	Pseudomonas syringae group genomosp. 3	Pseudomonas syringae pv. tomato str. DC3000 plasmid pDC3000A, complete sequence	NA	NA	NA	taxon:223283	NA	NA	NA	NA	genomic DNA	Pseudomonas syringae pv. tomato str. DC3000	pDC3000A	DC3000	NA	NA	NA	NA	pathovar: tomato	NA	NA	NA	NA	NA	NA	NA	NA	NA	NA	NA	NA	NA	NA	NA	NA	NA	NA	NA	NA	NA
15	AE017171.1	circular	57889	Bacteria	Firmicutes	Bacilli	Bacillales	Staphylococcaceae	Staphylococcus	Staphylococcus aureus	Staphylococcus aureus plasmid pLW043, complete sequence	NA	NA	NA	taxon:1280	NA	NA	NA	NA	genomic DNA	Staphylococcus aureus	pLW043	NA	NA	NA	NA	NA	NA	NA	NA	NA	NA	NA	NA	NA	NA	NA	NA	NA	NA	NA	NA	NA	NA	NA	NA	NA	NA	NA
16	AF001314.2	circular	10836	Bacteria	Firmicutes	Bacilli	Lactobacillales	Streptococcaceae	Lactococcus	Lactococcus lactis	Lactococcus lactis plasmid pSRQ900, complete sequence	NA	NA	NA	taxon:1358	NA	NA	NA	NA	genomic DNA	Lactococcus lactis	pSRQ900	W-37	NA	NA	NA	NA	NA	NA	NA	NA	NA	NA	NA	NA	NA	NA	NA	NA	NA	NA	NA	NA	NA	NA	NA	NA	NA	NA
17	AF003958.2	circular	6076	Bacteria	Proteobacteria	Gammaproteobacteria	Pseudomonadales	Moraxellaceae	Acinetobacter	Acinetobacter sp. SUN	Acinetobacter sp. SUN resistance plasmid pRAY, complete genome	NA	NA	NA	taxon:61312	NA	NA	NA	NA	genomic DNA	Acinetobacter sp. SUN	pRAY	NA	NA	NA	NA	NA	clinical isolate	NA	NA	NA	NA	NA	NA	NA	NA	NA	NA	NA	NA	NA	NA	NA	NA	NA	NA	NA	NA	NA
18	AF015088.1	circular	5936	Bacteria	Actinobacteria	Actinobacteria	Corynebacteriales	Nocardiaceae	Rhodococcus	Rhodococcus erythropolis	Rhodococcus erythropolis plasmid pFAJ2600 complete sequence	NA	NA	NA	taxon:1833	NA	NA	NA	NA	genomic DNA	Rhodococcus erythropolis	pFAJ2600	NI86/21	NA	NA	NA	NA	NA	NA	NA	NA	NA	NA	NA	NA	NA	NA	NA	NA	NA	NA	NA	NA	NA	NA	NA	NA	NA	NA
19	AF022180.1	circular	2672	Bacteria	Firmicutes	Bacilli	Lactobacillales	Streptococcaceae	Streptococcus	Streptococcus thermophilus	Streptococcus thermophilus strain ST371 cryptic plasmid pER371, complete sequence	NA	NA	NA	taxon:1308	NA	NA	NA	NA	genomic DNA	Streptococcus thermophilus	pER371	ST371	NA	NA	NA	NA	cryptic plasmid	NA	NA	NA	NA	NA	NA	NA	NA	NA	NA	NA	NA	NA	NA	NA	NA	NA	NA	NA	NA	NA
20	AF022647.1	circular	6281	Bacteria	Fusobacteria	Fusobacteriia	Fusobacteriales	Fusobacteriaceae	Fusobacterium	Fusobacterium nucleatum	Fusobacterium nucleatum plasmid pPA52, complete sequence	NA	NA	NA	taxon:851	NA	NA	NA	NA	genomic DNA	Fusobacterium nucleatum	pPA52	FDC 27-17	NA	NA	NA	NA	NA	NA	NA	NA	NA	NA	NA	NA	NA	NA	NA	NA	NA	NA	NA	NA	NA	NA	NA	NA	NA	NA
21	AF025795.1	circular	4656	Bacteria	Proteobacteria	Gammaproteobacteria	Enterobacterales	Enterobacteriaceae	Salmonella	Salmonella enterica	Salmonella enterica subsp. enterica serovar Berta plasmid pBERT, complete sequence	NA	NA	NA	taxon:28142	NA	NA	NA	NA	genomic DNA	Salmonella enterica subsp. enterica serovar Berta	pBERT	NA	Berta	enterica	NA	NA	NA	NA	NA	NA	NA	NA	NA	NA	NA	NA	NA	NA	NA	NA	NA	NA	NA	NA	NA	NA	NA	NA
22	AF027303.1	linear	1222	Bacteria	Proteobacteria	Epsilonproteobacteria	Campylobacterales	Helicobacteraceae	Helicobacter	Helicobacter pylori	Helicobacter pylori plasmid pHP489, complete plasmid sequence	NA	NA	NA	taxon:210	NA	NA	NA	NA	genomic DNA	Helicobacter pylori	pHP489	489	NA	NA	NA	NA	small cryptic plasmid	NA	NA	NA	NA	NA	NA	NA	NA	NA	NA	NA	NA	NA	NA	NA	NA	NA	NA	NA	NA	NA
23	AF028735.2	circular	1987	Bacteria	Firmicutes	Erysipelotrichia	Erysipelotrichales	Erysipelotrichaceae	Erysipelothrix	Erysipelothrix rhusiopathiae	Erysipelothrix rhusiopathiae plasmid pAP1, complete sequence	NA	NA	NA	taxon:1648	NA	NA	NA	NA	genomic DNA	Erysipelothrix rhusiopathiae	pAP1	S-1	NA	NA	NA	NA	NA	NA	NA	NA	NA	NA	NA	NA	NA	NA	NA	NA	NA	NA	NA	NA	NA	NA	NA	NA	NA	NA
24	AF036485.2	circular	42810	Bacteria	Firmicutes	Bacilli	Lactobacillales	Streptococcaceae	Lactococcus	Lactococcus lactis	Lactococcus lactis subsp. cremoris plasmid pNZ4000, complete sequence	NA	NA	NA	taxon:1359	NA	NA	NA	NA	genomic DNA	Lactococcus lactis subsp. cremoris	pNZ4000	NIZO B40	NA	cremoris	NA	NA	NA	NA	NA	NA	NA	NA	NA	NA	NA	NA	NA	NA	NA	NA	NA	NA	NA	NA	NA	NA	NA	NA
25	AF036712.1	circular	7028	Bacteria	Firmicutes	Bacilli	Bacillales	Bacillaceae	Bacillus	Bacillus pumilus	Bacillus pumilus plasmid pPL10, complete plasmid sequence	NA	NA	NA	ATCC:12140, taxon:1408	NA	NA	NA	NA	genomic DNA	Bacillus pumilus	pPL10	ATCC 12140	NA	NA	NA	NA	NA	NA	NA	NA	NA	NA	NA	NA	NA	NA	NA	NA	NA	NA	NA	NA	NA	NA	NA	NA	NA	NA
26	AF041836.1	circular	7967	Bacteria	Proteobacteria	Gammaproteobacteria	Enterobacterales	Erwiniaceae	Buchnera	Buchnera aphidicola	Buchnera aphidicola (Schizaphis graminum) plasmid pLeu-Sg, complete plasmid sequence	NA	NA	NA	taxon:98794	NA	Schizaphis graminum	NA	NA	genomic DNA	Buchnera aphidicola (Schizaphis graminum)	pLeu-Sg	NA	NA	NA	NA	NA	endosymbiont	NA	NA	NA	NA	NA	NA	NA	NA	NA	NA	NA	NA	NA	NA	NA	NA	NA	NA	NA	NA	NA
27	AF047385.1	circular	3162	Bacteria	Firmicutes	Bacilli	Lactobacillales	Streptococcaceae	Streptococcus	Streptococcus pneumoniae	Streptococcus pneumoniae plasmid pSMB1, complete sequence	NA	NA	NA	taxon:1313	NA	NA	NA	NA	genomic DNA	Streptococcus pneumoniae	pSMB1	A6011	NA	NA	NA	NA	NA	NA	NA	NA	NA	NA	NA	NA	NA	NA	NA	NA	NA	NA	NA	NA	NA	NA	NA	NA	NA	NA
28	AF047696.1	circular	3161	Bacteria	Firmicutes	Bacilli	Lactobacillales	Streptococcaceae	Streptococcus	Streptococcus pneumoniae	Streptococcus pneumoniae plasmid pDP1, complete sequence	NA	NA	NA	taxon:373153	NA	NA	NA	NA	genomic DNA	Streptococcus pneumoniae D39	pDP1	D39	NA	NA	NA	NA	type 2; Dpn II restricted; isolated in 1916 in New York by Avery	NA	NA	NA	NA	NA	NA	NA	NA	NA	NA	NA	NA	NA	NA	NA	NA	NA	NA	NA	NA	NA
29	AF050494.1	circular	5658	Bacteria	Firmicutes	Bacilli	Lactobacillales	Streptococcaceae	Streptococcus	Streptococcus mutans	Streptococcus mutans strain LM7 plasmid pLM7, complete plasmid sequence	NA	NA	NA	taxon:1309	NA	NA	NA	NA	genomic DNA	Streptococcus mutans	pLM7	LM7	NA	NA	NA	NA	NA	NA	NA	NA	NA	NA	NA	NA	NA	NA	NA	NA	NA	NA	NA	NA	NA	NA	NA	NA	NA	NA
30	AF051917.1	circular	46445	Bacteria	Firmicutes	Bacilli	Bacillales	Staphylococcaceae	Staphylococcus	Staphylococcus aureus	Staphylococcus aureus plasmid pSK41, complete sequence	NA	NA	NA	taxon:1280	NA	NA	NA	NA	genomic DNA	Staphylococcus aureus	pSK41	NA	NA	NA	NA	NA	NA	NA	NA	NA	NA	NA	NA	NA	NA	NA	NA	NA	NA	NA	NA	NA	NA	NA	NA	NA	NA	NA
31	AF052650.1	circular	4719	Bacteria	Proteobacteria	Gammaproteobacteria	Vibrionales	Vibrionaceae	Vibrio	Vibrio cholerae	Vibrio cholerae strain O395P plasmid pTLC, complete sequence	NA	NA	NA	taxon:666	NA	NA	NA	NA	genomic DNA	Vibrio cholerae	pTLC	O395P	NA	NA	NA	NA	cryptic plasmid linked to the CTX prophage; a similar sequence is integrated into the genome	NA	NA	NA	NA	NA	NA	NA	NA	NA	NA	NA	NA	NA	NA	NA	NA	NA	NA	NA	NA	NA
32	AF053946.1	circular	70504	Bacteria	Proteobacteria	Gammaproteobacteria	Enterobacterales	Yersiniaceae	Yersinia	Yersinia pestis	Yersinia pestis strain KIM5 plasmid pCD1, complete sequence	NA	NA	NA	taxon:632	NA	NA	NA	NA	genomic DNA	Yersinia pestis	pCD1	KIM5	NA	NA	NA	NA	NA	NA	NA	NA	NA	NA	NA	NA	NA	NA	NA	NA	NA	NA	NA	NA	NA	NA	NA	NA	NA	NA
33	AF053947.1	circular	100984	Bacteria	Proteobacteria	Gammaproteobacteria	Enterobacterales	Yersiniaceae	Yersinia	Yersinia pestis	Yersinia pestis strain KIM5 plasmid pMT1, complete sequence	NA	NA	NA	taxon:632	NA	NA	NA	NA	genomic DNA	Yersinia pestis	pMT1	KIM5	NA	NA	NA	NA	NA	NA	NA	NA	NA	NA	NA	NA	NA	NA	NA	NA	NA	NA	NA	NA	NA	NA	NA	NA	NA	NA
34	AF055345.1	circular	4442	Bacteria	Proteobacteria	Gammaproteobacteria	Thiotrichales	Francisellaceae	Francisella	Francisella tularensis	Francisella tularensi plasmid pOM1, complete sequence	NA	NA	NA	taxon:263	NA	NA	NA	NA	genomic DNA	Francisella tularensis	pOM1	LVS	NA	NA	NA	NA	NA	NA	NA	NA	NA	NA	NA	NA	NA	NA	NA	NA	NA	NA	NA	NA	NA	NA	NA	NA	NA	NA
35	AF056496.1	circular	3520	Bacteria	Proteobacteria	Epsilonproteobacteria	Campylobacterales	Helicobacteraceae	Helicobacter	Helicobacter pylori	Helicobacter pylori plasmid pHPO100, complete sequence	NA	NA	NA	taxon:210	NA	NA	NA	NA	genomic DNA	Helicobacter pylori	pHPO100	OU145B	NA	NA	NA	NA	NA	NA	NA	NA	NA	NA	NA	NA	NA	NA	NA	NA	NA	NA	NA	NA	NA	NA	NA	NA	NA	NA
36	AF065404.1	circular	181654	Bacteria	Firmicutes	Bacilli	Bacillales	Bacillaceae	Bacillus	Bacillus anthracis	Bacillus anthracis virulence plasmid PX01, complete sequence	NA	NA	NA	taxon:1392	NA	NA	NA	NA	genomic DNA	Bacillus anthracis	virulence plasmid PX01	Sterne	NA	NA	NA	NA	NA	NA	NA	NA	NA	NA	NA	NA	NA	NA	NA	NA	NA	NA	NA	NA	NA	NA	NA	NA	NA	NA
37	AF069302.1	circular	19533	Bacteria	Firmicutes	Bacilli	Lactobacillales	Lactobacillaceae	Pediococcus	Pediococcus pentosaceus	Pediococcus pentosaceus plasmid pMD136, complete sequence	NA	NA	NA	ATCC:43200, taxon:1255	NA	NA	NA	NA	genomic DNA	Pediococcus pentosaceus	pMD136	ATCC 43200	NA	NA	NA	NA	pediocin A producing strain	NA	NA	NA	NA	NA	NA	NA	NA	NA	NA	NA	NA	NA	NA	NA	NA	NA	NA	NA	NA	NA
38	AF074612.1	circular	70559	Bacteria	Proteobacteria	Gammaproteobacteria	Enterobacterales	Yersiniaceae	Yersinia	Yersinia pestis	Yersinia pestis strain KIM5 plasmid pCD1, complete sequence	NA	NA	NA	taxon:632	NA	NA	NA	NA	genomic DNA	Yersinia pestis	pCD1	KIM5	NA	NA	NA	NA	NA	NA	NA	NA	NA	NA	NA	NA	NA	NA	NA	NA	NA	NA	NA	NA	NA	NA	NA	NA	NA	NA
39	AF077006.1	circular	12887	Bacteria	Proteobacteria	Epsilonproteobacteria	Campylobacterales	Helicobacteraceae	Helicobacter	Helicobacter pylori	Helicobacter pylori plasmid pHPM186, complete sequence	NA	NA	NA	taxon:210	NA	NA	NA	NA	genomic DNA	Helicobacter pylori	pHPM186	HPM186	NA	NA	NA	NA	NA	NA	NA	NA	NA	NA	NA	NA	NA	NA	NA	NA	NA	NA	NA	NA	NA	NA	NA	NA	NA	NA
40	AF082180.1	circular	5609	Bacteria	Bacteroidetes	Flavobacteriia	Flavobacteriales	Flavobacteriaceae	Riemerella	Riemerella anatipestifer	Riemerella anatipestifer plasmid pCFC2, complete sequence	NA	NA	NA	taxon:34085	NA	NA	NA	NA	genomic DNA	Riemerella anatipestifer	pCFC2	20	NA	NA	NA	NA	NA	NA	NA	NA	NA	NA	NA	NA	NA	NA	NA	NA	NA	NA	NA	NA	NA	NA	NA	NA	NA	NA
41	AF085719.1	circular	5750	Bacteria	Actinobacteria	Actinobacteria	Bifidobacteriales	Bifidobacteriaceae	Bifidobacterium	Bifidobacterium breve	Bifidobacterium breve plasmid pCIBb1, complete sequence	NA	NA	NA	taxon:1685	NA	NA	NA	NA	genomic DNA	Bifidobacterium breve	pCIBb1	NCFB 2258	NA	NA	NA	NA	NA	NA	NA	NA	NA	NA	NA	NA	NA	NA	NA	NA	NA	NA	NA	NA	NA	NA	NA	NA	NA	NA
42	AF091592.1	circular	7949	Bacteria	Firmicutes	Bacilli	Bacillales	Bacillaceae	Bacillus	Bacillus subtilis	Bacillus subtilis plasmid p1414, complete plasmid sequence	NA	NA	Russia:Moscow	taxon:1423	NA	NA	NA	NA	genomic DNA	Bacillus subtilis	p1414	NA	NA	NA	NA	NA	NA	NA	NA	NA	NA	NA	NA	NA	NA	NA	NA	NA	NA	NA	NA	NA	NA	NA	NA	NA	NA	NA
43	AF092037.1	circular	4447	Bacteria	Actinobacteria	Actinobacteria	Corynebacteriales	Corynebacteriaceae	Corynebacterium	Corynebacterium glutamicum	Corynebacterium glutamicum plasmid pBl1, complete sequence	NA	NA	NA	ATCC:21086, taxon:1718	NA	NA	NA	NA	genomic DNA	Corynebacterium glutamicum	pBl1	ATCC 21086	NA	NA	NA	NA	similar to the the plasmids represented in GenBank entries X03987 and D00038	NA	NA	NA	NA	NA	NA	NA	NA	NA	NA	NA	NA	NA	NA	NA	NA	NA	NA	NA	NA	NA
44	AF093750.2	circular	4431	Bacteria	Firmicutes	Bacilli	Bacillales	Staphylococcaceae	Staphylococcus	Staphylococcus sciuri	Staphylococcus sciuri subsp. sciuri plasmid pACK6, complete sequence	NA	NA	NA	taxon:147467	NA	NA	NA	NA	genomic DNA	Staphylococcus sciuri subsp. sciuri	pACK6	NA	NA	sciuri	NA	NA	NA	NA	NA	NA	NA	NA	NA	NA	NA	NA	NA	NA	NA	NA	NA	NA	NA	NA	NA	NA	NA	NA
45	AF102990.1	circular	69673	Bacteria	Proteobacteria	Gammaproteobacteria	Enterobacterales	Yersiniaceae	Yersinia	Yersinia enterocolitica	Yersinia enterocolitica plasmid pYVe227, complete sequence	NA	NA	NA	taxon:913028	NA	NA	NA	NA	genomic DNA	Yersinia enterocolitica W22703	pYVe227	W22703	NA	NA	NA	NA	NA	NA	NA	O:9	NA	NA	NA	NA	NA	NA	NA	NA	NA	NA	NA	NA	NA	NA	NA	NA	NA	NA
46	AF109691.1	circular	8713	Bacteria	Firmicutes	Bacilli	Lactobacillales	Lactobacillaceae	Lactobacillus	Lactobacillus delbrueckii	Lactobacillus delbrueckii subsp. lactis plasmid pLL1212, complete plasmid sequence	NA	NA	NA	taxon:29397	NA	NA	NA	NA	genomic DNA	Lactobacillus delbrueckii subsp. lactis	pLL1212	CRL1212	NA	lactis	NA	NA	NA	NA	NA	NA	NA	NA	NA	NA	NA	NA	NA	NA	NA	NA	NA	NA	NA	NA	NA	NA	NA	NA
47	AF110140.1	circular	5123	Bacteria	Proteobacteria	Alphaproteobacteria	Rhodospirillales	Acetobacteraceae	Acetobacter	Acetobacter aceti	Acetobacter aceti plasmid pAC5, complete sequence	NA	NA	NA	taxon:435	NA	NA	NA	NA	genomic DNA	Acetobacter aceti	pAC5	NA	NA	NA	NA	NA	cryptic plasmid	NA	NA	NA	NA	NA	NA	NA	NA	NA	NA	NA	NA	NA	NA	NA	NA	NA	NA	NA	NA	NA
48	AF112856.1	circular	3649	Bacteria	Spirochaetes	Spirochaetia	Spirochaetales	Spirochaetaceae	Treponema	Treponema denticola	Treponema denticola plasmid pTS1, complete sequence	NA	NA	NA	taxon:158	NA	Homo sapiens	NA	NA	genomic DNA	Treponema denticola	pTS1	U9b	NA	NA	NA	NA	NA	NA	NA	NA	NA	NA	NA	NA	NA	NA	NA	NA	NA	NA	NA	NA	NA	NA	NA	NA	NA	NA
49	AF113972.1	circular	4692	Bacteria	Firmicutes	Negativicutes	Selenomonadales	Selenomonadaceae	Selenomonas	Selenomonas ruminantium	Selenomonas ruminantium plasmid pSR1, complete sequence	NA	NA	NA	taxon:971	NA	NA	NA	NA	genomic DNA	Selenomonas ruminantium	pSR1	HD4	NA	NA	NA	NA	NA	NA	NA	NA	NA	NA	NA	NA	NA	NA	NA	NA	NA	NA	NA	NA	NA	NA	NA	NA	NA	NA
50	AF121418.1	circular	3990	Bacteria	Proteobacteria	Gammaproteobacteria	Thiotrichales	Francisellaceae	Francisella	Francisella tularensis	Francisella tularensis var. novicida plasmid pFNL10, complete sequence	NA	NA	NA	taxon:1452728	NA	NA	NA	NA	genomic DNA	Francisella tularensis subsp. novicida F6168	pFNL10	F6168	NA	novicida	NA	NA	NA	NA	NA	NA	NA	NA	NA	NA	NA	NA	NA	NA	NA	NA	NA	NA	NA	NA	NA	NA	NA	NA
51	AF128883.1	circular	20719	Bacteria	Firmicutes	Bacilli	Bacillales	Staphylococcaceae	Staphylococcus	Staphylococcus aureus	Staphylococcus aureus 21kb plasmid, complete sequence	NA	NA	NA	taxon:1280	NA	NA	NA	NA	genomic DNA	Staphylococcus aureus	21kb plasmid	NA	NA	NA	NA	NA	obtained from a clinical isolate	NA	NA	NA	NA	NA	NA	NA	NA	NA	NA	NA	NA	NA	NA	NA	NA	NA	NA	NA	NA	NA
52	AF129811.3	circular	12084	Bacteria	Proteobacteria	Gammaproteobacteria	Pseudomonadales	Moraxellaceae	Moraxella	Moraxella catarrhalis	Moraxella catarrhalis strain E22 plasmid pLQ510, complete sequence	NA	NA	NA	taxon:480	NA	NA	NA	NA	genomic DNA	Moraxella catarrhalis	pLQ510	E22	NA	NA	NA	NA	NA	NA	NA	NA	NA	NA	NA	NA	NA	NA	NA	NA	NA	NA	NA	NA	NA	NA	NA	NA	NA	NA
53	AF131076.1	circular	32601	Bacteria	Proteobacteria	Gammaproteobacteria	Legionellales	Coxiellaceae	Coxiella	Coxiella burnetii	Coxiella burnetii strain R1140 plasmid QpDV, complete sequence	NA	NA	NA	taxon:777	NA	NA	NA	NA	genomic DNA	Coxiella burnetii	QpDV	R1140	NA	NA	NA	NA	NA	NA	NA	NA	NA	NA	NA	NA	NA	NA	NA	NA	NA	NA	NA	NA	NA	NA	NA	NA	NA	NA
54	AF135182.5	circular	153842	Bacteria	Proteobacteria	Gammaproteobacteria	Enterobacterales	Yersiniaceae	Serratia	Serratia entomophila	Serratia entomophila plasmid pADAP, complete sequence	NA	NA	NA	taxon:42906	NA	NA	NA	NA	genomic DNA	Serratia entomophila	pADAP	A1MO2	NA	NA	NA	NA	conjugative plasmid	NA	NA	NA	NA	NA	NA	NA	NA	NA	NA	NA	NA	NA	NA	NA	NA	NA	NA	NA	NA	NA
55	AF141869.1	circular	1410	Bacteria	Firmicutes	Negativicutes	Selenomonadales	Selenomonadaceae	Selenomonas	Selenomonas ruminantium	Selenomonas ruminantium plasmid pJW1, complete sequence	NA	NA	NA	taxon:971	NA	NA	NA	NA	genomic DNA	Selenomonas ruminantium	pJW1	JW13	NA	NA	NA	NA	NA	NA	NA	NA	NA	NA	NA	NA	NA	NA	NA	NA	NA	NA	NA	NA	NA	NA	NA	NA	NA	NA
56	AF152923.1	circular	5919	Bacteria	Proteobacteria	Gammaproteobacteria	Enterobacterales	Yersiniaceae	Yersinia	Yersinia pestis	Yersinia pestis CH971662 cryptic plasmid pYC, complete sequence	NA	NA	China: Ban Na, Menghai county	taxon:632	NA	NA	NA	NA	genomic DNA	Yersinia pestis	pYC	CH971662	NA	NA	NA	NA	cryptic plasmid	NA	NA	NA	NA	NA	NA	NA	NA	NA	NA	NA	NA	NA	NA	NA	NA	NA	NA	NA	NA	NA
57	AF153414.1	circular	6159	Bacteria	Firmicutes	Bacilli	Lactobacillales	Streptococcaceae	Lactococcus	Lactococcus lactis	Lactococcus lactis plasmid pCIS3, complete sequence	NA	NA	NA	taxon:1358	NA	NA	NA	NA	genomic DNA	Lactococcus lactis	pCIS3	NA	NA	NA	NA	NA	NA	NA	NA	NA	NA	NA	NA	NA	NA	NA	NA	NA	NA	NA	NA	NA	NA	NA	NA	NA	NA	NA
58	AF156893.2	circular	5258	Bacteria	Proteobacteria	Gammaproteobacteria	Enterobacterales	Enterobacteriaceae	Klebsiella	Klebsiella pneumoniae	Klebsiella pneumoniae plasmid pKlebB-k17/80, complete sequence	NA	NA	NA	taxon:573	NA	NA	NA	NA	genomic DNA	Klebsiella pneumoniae	pKlebB-k17/80	NA	NA	NA	NA	NA	klebB plasmid; pklebB	NA	NA	NA	NA	NA	NA	NA	NA	NA	NA	NA	NA	NA	NA	NA	NA	NA	NA	NA	NA	NA
59	AF159249.1	circular	5887	Bacteria	Fusobacteria	Fusobacteriia	Fusobacteriales	Fusobacteriaceae	Fusobacterium	Fusobacterium nucleatum	Fusobacterium nucleatum plasmid pFN1, complete sequence	NA	NA	NA	taxon:851	NA	NA	NA	NA	genomic DNA	Fusobacterium nucleatum	pFN1	12230	NA	NA	NA	NA	lower-respiratory tract clinical isolate from the Wadsworth Anaerobe Laboratory, West Los Angeles Veterans Affairs Medical Center	NA	NA	NA	NA	NA	NA	NA	NA	NA	NA	NA	NA	NA	NA	NA	NA	NA	NA	NA	NA	NA
60	AF164559.3	circular	9328	Bacteria	Firmicutes	Bacilli	Lactobacillales	Enterococcaceae	Enterococcus	Enterococcus faecalis	Enterococcus faecalis plasmid pEF1071, complete sequence	NA	NA	NA	taxon:1351	NA	NA	NA	NA	genomic DNA	Enterococcus faecalis	pEF1071	BFE 1071	NA	NA	NA	NA	NA	NA	NA	NA	NA	NA	NA	NA	NA	NA	NA	NA	NA	NA	NA	NA	NA	NA	NA	NA	NA	NA
61	AF188935.1	circular	96231	Bacteria	Firmicutes	Bacilli	Bacillales	Bacillaceae	Bacillus	Bacillus anthracis	Bacillus anthracis plasmid pXO2, complete sequence	NA	NA	NA	taxon:1392	NA	NA	NA	NA	genomic DNA	Bacillus anthracis	pXO2	NA	NA	NA	NA	NA	NA	NA	NA	NA	NA	NA	NA	NA	NA	NA	NA	NA	NA	NA	NA	NA	NA	NA	NA	NA	NA	NA
62	AF196967.2	circular	5558	Bacteria	Firmicutes	Bacilli	Lactobacillales	Lactobacillaceae	Pediococcus	Pediococcus damnosus	Pediococcus damnosus plasmid pF8801, complete sequence	NA	NA	NA	taxon:51663	NA	NA	NA	NA	genomic DNA	Pediococcus damnosus	pF8801	8801 (IOEB)	NA	NA	NA	NA	plasmid linked to the ropy phenotype	NA	NA	NA	NA	NA	NA	NA	NA	NA	NA	NA	NA	NA	NA	NA	NA	NA	NA	NA	NA	NA
63	AF197335.1	circular	5847	Bacteria	Proteobacteria	Gammaproteobacteria	Enterobacterales	Enterobacteriaceae	Escherichia	Escherichia coli	Escherichia coli pCol-let plasmid, complete plasmid sequence	NA	NA	NA	taxon:562	NA	NA	NA	NA	genomic DNA	Escherichia coli	pCol-let	NA	NA	NA	NA	NA	isolated from a Yanamamo Indian	NA	NA	NA	NA	NA	NA	NA	NA	NA	NA	NA	NA	NA	NA	NA	NA	NA	NA	NA	NA	NA
64	AF200347.3	circular	18664	Bacteria	Firmicutes	Bacilli	Lactobacillales	Lactobacillaceae	Lactobacillus	Lactobacillus curvatus	Lactobacillus curvatus strain CRL705 plasmid pRC18, complete sequence	NA	NA	NA	taxon:28038	NA	NA	NA	NA	genomic DNA	Lactobacillus curvatus	pRC18	CRL705	NA	NA	NA	NA	isolated from a dry sausage	NA	NA	NA	NA	NA	NA	NA	NA	NA	NA	NA	NA	NA	NA	NA	NA	NA	NA	NA	NA	NA
65	AF202532.3	circular	6578	Bacteria	Firmicutes	Bacilli	Bacillales	Bacillaceae	Bacillus	Bacillus thuringiensis	Bacillus thuringiensis plasmid pBMB9741, complete sequence	NA	NA	NA	taxon:570416	NA	NA	NA	NA	genomic DNA	Bacillus thuringiensis serovar kurstaki str. YBT-1520	pBMB9741	YBT-1520	NA	NA	NA	NA	NA	NA	NA	NA	NA	NA	NA	NA	NA	NA	NA	NA	NA	NA	NA	NA	NA	NA	NA	NA	NA	NA
66	AF205068.1	circular	4523	Bacteria	Firmicutes	Bacilli	Lactobacillales	Lactobacillaceae	Lactobacillus	Lactobacillus reuteri	Lactobacillus reuteri endogenous plasmid, complete sequence	NA	NA	NA	taxon:1598	NA	NA	NA	NA	genomic DNA	Lactobacillus reuteri	endogenous plasmid	AE78	NA	NA	NA	NA	NA	NA	NA	NA	NA	NA	NA	NA	NA	NA	NA	NA	NA	NA	NA	NA	NA	NA	NA	NA	NA	NA
67	AF207855.1	circular	6159	Bacteria	Firmicutes	Bacilli	Lactobacillales	Streptococcaceae	Lactococcus	Lactococcus lactis	Lactococcus lactis plasmid pAH33, complete sequence	NA	NA	NA	taxon:1358	NA	NA	NA	NA	genomic DNA	Lactococcus lactis	pAH33	DPC220	NA	NA	NA	NA	NA	NA	NA	NA	NA	NA	NA	NA	NA	NA	NA	NA	NA	NA	NA	NA	NA	NA	NA	NA	NA	NA
68	AF226280.2	circular	37468	Bacteria	Proteobacteria	Epsilonproteobacteria	Campylobacterales	Campylobacteraceae	Campylobacter	Campylobacter jejuni	Campylobacter jejuni 81-176 virulence plasmid pVir, complete sequence	NA	NA	NA	taxon:354242	NA	NA	NA	NA	genomic DNA	Campylobacter jejuni subsp. jejuni 81-176	pVir	81-176	NA	NA	NA	NA	virulence plasmid	NA	NA	NA	NA	NA	NA	NA	NA	NA	NA	NA	NA	NA	NA	NA	NA	NA	NA	NA	NA	NA
69	AF233873.1	circular	1995	Bacteria	Proteobacteria	Gammaproteobacteria	Thiotrichales	Piscirickettsiaceae	Methylophaga	Methylophaga thalassica	Methylophaga thalassica strain S1 2kb cryptic plasmid, complete plasmid sequence	NA	NA	NA	taxon:40223	NA	NA	NA	NA	genomic DNA	Methylophaga thalassica	2kb cryptic plasmid	S1	NA	NA	NA	NA	NA	NA	NA	NA	NA	NA	NA	NA	NA	NA	NA	NA	NA	NA	NA	NA	NA	NA	NA	NA	NA	NA
70	AF236060.1	linear	6127	Bacteria	Firmicutes	Bacilli	Lactobacillales	Lactobacillaceae	Lactobacillus	Lactobacillus delbrueckii	Lactobacillus delbrueckii subsp. bulgaricus plasmid pLBB1, complete plasmid sequence	NA	NA	NA	taxon:1585	NA	NA	NA	NA	genomic DNA	Lactobacillus delbrueckii subsp. bulgaricus	pLBB1	NA	NA	bulgaricus	NA	NA	NA	NA	NA	NA	NA	NA	NA	NA	NA	NA	NA	NA	NA	NA	NA	NA	NA	NA	NA	NA	NA	NA
71	AF241888.2	circular	7904	Bacteria	Firmicutes	Bacilli	Bacillales	Staphylococcaceae	Staphylococcus	Staphylococcus aureus	Staphylococcus aureus plasmid pRJ6, complete sequence	NA	NA	NA	taxon:1280	NA	NA	NA	NA	genomic DNA	Staphylococcus aureus	pRJ6	NA	NA	NA	NA	NA	NA	NA	NA	NA	NA	NA	NA	NA	NA	NA	NA	NA	NA	NA	NA	NA	NA	NA	NA	NA	NA	NA
72	AF244083.1	circular	4807	Bacteria	Proteobacteria	Gammaproteobacteria	Enterobacterales	Hafniaceae	Edwardsiella	Edwardsiella ictaluri	Edwardsiella ictaluri plasmid pEI1, complete plasmid sequence	NA	NA	NA	taxon:67780	NA	Ictalurus punctatus	NA	NA	genomic DNA	Edwardsiella ictaluri	pEI1	NA	NA	NA	NA	NA	NA	NA	NA	NA	NA	NA	NA	NA	NA	NA	NA	NA	NA	NA	NA	NA	NA	NA	NA	NA	NA	NA
73	AF244084.1	circular	5643	Bacteria	Proteobacteria	Gammaproteobacteria	Enterobacterales	Hafniaceae	Edwardsiella	Edwardsiella ictaluri	Edwardsiella ictaluri plasmid pEI2, complete plasmid sequence	NA	NA	NA	taxon:67780	NA	Ictalurus punctatus	NA	NA	genomic DNA	Edwardsiella ictaluri	pEI2	NA	NA	NA	NA	NA	NA	NA	NA	NA	NA	NA	NA	NA	NA	NA	NA	NA	NA	NA	NA	NA	NA	NA	NA	NA	NA	NA
74	AF247159.1	circular	13433	Bacteria	Firmicutes	Bacilli	Lactobacillales	Streptococcaceae	Lactococcus	Lactococcus lactis	Lactococcus lactis subsp. cremoris plasmid pHP003, complete sequence	NA	NA	NA	taxon:1359	NA	NA	NA	NA	genomic DNA	Lactococcus lactis subsp. cremoris	pHP003	HP	NA	cremoris	NA	NA	NA	NA	NA	NA	NA	NA	NA	NA	NA	NA	NA	NA	NA	NA	NA	NA	NA	NA	NA	NA	NA	NA
75	AF264948.1	circular	28185	Bacteria	Proteobacteria	Gammaproteobacteria	Enterobacterales	Erwiniaceae	Erwinia	Erwinia amylovora	Erwinia amylovora plasmid pEA29, complete sequence	NA	NA	USA: originally isolated from a pear tree in state of Washington	taxon:552	NA	NA	NA	NA	genomic DNA	Erwinia amylovora	pEA29	Ea88	NA	NA	NA	NA	NA	NA	NA	NA	NA	NA	NA	NA	NA	NA	NA	NA	NA	NA	NA	NA	NA	NA	NA	NA	NA	NA
76	AF273219.1	circular	2297	Bacteria	Proteobacteria	Gammaproteobacteria	Pseudomonadales	Pseudomonadaceae	Pseudomonas	Pseudomonas putida	Pseudomonas putida plasmid pYQ39, complete plasmid sequence	NA	NA	NA	taxon:303	NA	NA	NA	NA	genomic DNA	Pseudomonas putida	pYQ39	NA	NA	NA	NA	NA	NA	NA	NA	NA	NA	NA	NA	NA	NA	NA	NA	NA	NA	NA	NA	NA	NA	NA	NA	NA	NA	NA
77	AF275307.1	circular	7817	Bacteria	Proteobacteria	Epsilonproteobacteria	Campylobacterales	Helicobacteraceae	Helicobacter	Helicobacter pylori	Helicobacter pylori plasmid pHPM8, complete sequence	NA	NA	NA	taxon:210	NA	NA	NA	NA	genomic DNA	Helicobacter pylori	pHPM8	HPM8	NA	NA	NA	NA	NA	NA	NA	NA	NA	NA	NA	NA	NA	NA	NA	NA	NA	NA	NA	NA	NA	NA	NA	NA	NA	NA
78	AF282884.1	circular	5210	Bacteria	Proteobacteria	Gammaproteobacteria	Enterobacterales	Enterobacteriaceae	Shigella	Shigella sonnei	Shigella sonnei plasmid ColJs, complete sequence	NA	NA	NA	taxon:624	NA	NA	NA	NA	genomic DNA	Shigella sonnei	ColJs	colicin type 7	NA	NA	NA	NA	NA	NA	NA	NA	NA	NA	NA	NA	NA	NA	NA	NA	NA	NA	NA	NA	NA	NA	NA	NA	NA	NA
79	AF291751.1	circular	3555	Bacteria	Actinobacteria	Actinobacteria	Propionibacteriales	Propionibacteriaceae	Propionibacterium	Propionibacterium freudenreichii	Propionibacterium freudenreichii plasmid p545, complete sequence	NA	NA	NA	taxon:1744	NA	NA	NA	NA	genomic DNA	Propionibacterium freudenreichii	p545	LMG16545	NA	NA	NA	NA	NA	NA	NA	NA	NA	NA	NA	NA	NA	NA	NA	NA	NA	NA	NA	NA	NA	NA	NA	NA	NA	NA
80	AF292711.1	circular	8720	Bacteria	Spirochaetes	Spirochaetia	Spirochaetales	Borreliaceae	Borreliella	Borreliella burgdorferi	Borrelia burgdorferi strain N40 plasmid cp9, complete sequence	NA	NA	NA	taxon:521007	NA	NA	NA	NA	genomic DNA	Borrelia burgdorferi N40	cp9	N40	NA	NA	NA	NA	NA	NA	NA	NA	NA	NA	NA	NA	NA	NA	NA	NA	NA	NA	NA	NA	NA	NA	NA	NA	NA	NA
81	AF295336.1	circular	4975	Bacteria	Fusobacteria	Fusobacteriia	Fusobacteriales	Fusobacteriaceae	Fusobacterium	Fusobacterium nucleatum	Fusobacterium nucleatum plasmid pKH9, complete sequence	NA	NA	NA	taxon:851	NA	NA	NA	NA	genomic DNA	Fusobacterium nucleatum	pKH9	KH9	NA	NA	NA	NA	NA	NA	NA	NA	NA	NA	NA	NA	NA	NA	NA	NA	NA	NA	NA	NA	NA	NA	NA	NA	NA	NA
82	AF300473.1	circular	4196	Bacteria	Proteobacteria	Gammaproteobacteria	Enterobacterales	Enterobacteriaceae	Klebsiella	Klebsiella pneumoniae	Klebsiella pneumoniae plasmid pKPN2, complete sequence	NA	NA	NA	taxon:573	NA	NA	NA	NA	genomic DNA	Klebsiella pneumoniae	pKPN2	2kI	NA	NA	NA	NA	NA	NA	NA	NA	NA	NA	NA	NA	NA	NA	NA	NA	NA	NA	NA	NA	NA	NA	NA	NA	NA	NA
83	AF301164.1	linear	3212	Bacteria	Proteobacteria	Epsilonproteobacteria	Campylobacterales	Campylobacteraceae	Campylobacter	Campylobacter jejuni	Campylobacter jejuni plasmid pCJ01, complete sequence	NA	NA	NA	taxon:197	NA	NA	NA	NA	genomic DNA	Campylobacter jejuni	pCJ01	21190	NA	NA	NA	NA	NA	NA	NA	NA	NA	NA	NA	NA	NA	NA	NA	NA	NA	NA	NA	NA	NA	NA	NA	NA	NA	NA
84	AF302424.1	circular	25407	Bacteria	Proteobacteria	Gammaproteobacteria	Pasteurellales	Pasteurellaceae	Aggregatibacter	Aggregatibacter actinomycetemcomitans	Actinobacillus actinomycetemcomitans plasmid pVT745, complete sequence	NA	NA	NA	taxon:714	NA	NA	NA	NA	genomic DNA	Aggregatibacter actinomycetemcomitans	pVT745	VT745	NA	NA	NA	NA	NA	NA	NA	NA	NA	NA	NA	NA	NA	NA	NA	NA	NA	NA	NA	NA	NA	NA	NA	NA	NA	NA
85	AF303375.1	circular	4242	Bacteria	Proteobacteria	Gammaproteobacteria	Pasteurellales	Pasteurellaceae	Actinobacillus	Actinobacillus pleuropneumoniae	Actinobacillus pleuropneumoniae plasmid pTYM1, complete sequence	NA	NA	NA	taxon:715	NA	NA	NA	NA	genomic DNA	Actinobacillus pleuropneumoniae	pTYM1	NA	NA	NA	NA	NA	NA	NA	NA	NA	NA	NA	NA	NA	NA	NA	NA	NA	NA	NA	NA	NA	NA	NA	NA	NA	NA	NA
86	AF305615.1	circular	4675	Bacteria	Proteobacteria	Gammaproteobacteria	Enterobacterales	Morganellaceae	Proteus	Proteus vulgaris	Proteus vulgaris plasmid pPvu1, complete sequence	NA	NA	NA	ATCC:13315, taxon:585	NA	NA	NA	NA	genomic DNA	Proteus vulgaris	pPvu1	ATCC 13315	NA	NA	NA	NA	NA	NA	NA	NA	NA	NA	NA	NA	NA	NA	NA	NA	NA	NA	NA	NA	NA	NA	NA	NA	NA	NA
87	AF306799.1	circular	6094	Bacteria	Firmicutes	Bacilli	Lactobacillales	Streptococcaceae	Lactococcus	Lactococcus lactis	Lactococcus lactis subsp. lactis strain MJC15 plasmid pCD4, complete sequence	NA	NA	NA	taxon:1360	NA	NA	NA	NA	genomic DNA	Lactococcus lactis subsp. lactis	pCD4	MJC15	NA	lactis	NA	NA	NA	NA	NA	NA	NA	NA	NA	NA	NA	NA	NA	NA	NA	NA	NA	NA	NA	NA	NA	NA	NA	NA
88	AF310974.1	circular	4234	Bacteria	Firmicutes	Bacilli	Lactobacillales	Lactobacillaceae	Lactobacillus	Lactobacillus sp. PC121B	Lactobacillus sp. PC121B plasmid p121BS, complete sequence	NA	NA	NA	taxon:1248330	NA	NA	swine feces	NA	genomic DNA	Lactobacillus sp. PC121B	p121BS	PC121B	NA	NA	NA	NA	plasmid isolated from newly isolated Lactobacillus species recovered from swine feces	NA	NA	NA	NA	NA	NA	NA	NA	NA	NA	NA	NA	NA	NA	NA	NA	NA	NA	NA	NA	NA
89	AF311902.1	circular	3172	Bacteria	Proteobacteria	Gammaproteobacteria	Enterobacterales	Enterobacteriaceae	Citrobacter	Citrobacter rodentium	Citrobacter rodentium strain DBS100 plasmid pCRP3, complete sequence	NA	NA	NA	taxon:67825	NA	NA	NA	NA	genomic DNA	Citrobacter rodentium	pCRP3	DBS100	NA	NA	NA	NA	similar to Escherichia coli O157:H7 strain 9705 3kb plasmid p9705	NA	NA	NA	NA	NA	NA	NA	NA	NA	NA	NA	NA	NA	NA	NA	NA	NA	NA	NA	NA	NA
90	AF312688.1	linear	22688	Bacteria	Actinobacteria	Actinobacteria	Corynebacteriales	Mycobacteriaceae	Mycobacterium	Mycobacterium celatum	Mycobacterium celatum plasmid pCLP, complete sequence	NA	NA	NA	taxon:28045	NA	NA	NA	NA	genomic DNA	Mycobacterium celatum	pCLP	NA	NA	NA	NA	NA	NA	NA	NA	NA	NA	NA	NA	NA	NA	NA	NA	NA	NA	NA	NA	NA	NA	NA	NA	NA	NA	NA
91	AF327371.1	circular	7212	Bacteria	Proteobacteria	Alphaproteobacteria	Rhizobiales	Rhizobiaceae	Sinorhizobium	Sinorhizobium meliloti	Sinorhizobium meliloti plasmid pRm1132f, complete sequence	NA	NA	NA	taxon:382	NA	NA	NA	NA	genomic DNA	Sinorhizobium meliloti	pRm1132f	NA	NA	NA	NA	NA	cryptic plasmid	NA	NA	NA	NA	NA	NA	NA	NA	NA	NA	NA	NA	NA	NA	NA	NA	NA	NA	NA	NA	NA
92	AF339846.1	circular	101648	Bacteria	Bacteroidetes	Cytophagia	Cytophagales	Microscillaceae	Microscilla	Microscilla sp. PRE1	Microscilla sp. PRE1 plasmid pSD15, complete sequence	NA	NA	NA	taxon:155537	NA	NA	NA	NA	genomic DNA	Microscilla sp. PRE1	pSD15	PRE1	NA	NA	NA	NA	NA	NA	NA	NA	NA	NA	NA	NA	NA	NA	NA	NA	NA	NA	NA	NA	NA	NA	NA	NA	NA	NA
93	AF359557.1	circular	39554	Bacteria	Proteobacteria	Gammaproteobacteria	Pseudomonadales	Pseudomonadaceae	Pseudomonas	Pseudomonas syringae group genomosp. 3	Pseudomonas syringae pv. maculicola plasmid pFKN, complete sequence	NA	NA	NA	taxon:698750	NA	NA	NA	NA	genomic DNA	Pseudomonas syringae pv. maculicola str. M6	pFKN	M6	NA	NA	NA	NA	pathovar: maculicola	NA	NA	NA	NA	NA	NA	NA	NA	NA	NA	NA	NA	NA	NA	NA	NA	NA	NA	NA	NA	NA
94	AF359574.1	circular	4488	Bacteria	Actinobacteria	Actinobacteria	Bifidobacteriales	Bifidobacteriaceae	Bifidobacterium	Bifidobacterium pseudocatenulatum	Bifidobacterium pseudocatenulatum plasmid p4M, complete sequence	NA	NA	NA	taxon:28026	NA	Homo sapiens	NA	NA	genomic DNA	Bifidobacterium pseudocatenulatum	p4M	VMKB4M	NA	NA	NA	NA	human intestinal isolate	NA	NA	NA	NA	NA	NA	NA	NA	NA	NA	NA	NA	NA	NA	NA	NA	NA	NA	NA	NA	NA
95	AF364477.1	circular	7617	Bacteria	Actinobacteria	Actinobacteria	Corynebacteriales	Corynebacteriaceae	Corynebacterium	Corynebacterium jeikeium	Corynebacterium jeikeium plasmid pK43, complete sequence	NA	NA	NA	taxon:38289	NA	NA	NA	NA	genomic DNA	Corynebacterium jeikeium	pK43	NA	NA	NA	NA	NA	NA	NA	NA	NA	NA	NA	NA	NA	NA	NA	NA	NA	NA	NA	NA	NA	NA	NA	NA	NA	NA	NA
96	AF378372.1	circular	4392	Bacteria	Firmicutes	Bacilli	Lactobacillales	Lactobacillaceae	Lactobacillus	Lactobacillus fermentum	Lactobacillus fermentum plasmid pKC5b, complete sequence	NA	NA	NA	taxon:1613	NA	NA	NA	NA	genomic DNA	Lactobacillus fermentum	pKC5b	KC5b	NA	NA	NA	NA	NA	NA	NA	NA	NA	NA	NA	NA	NA	NA	NA	NA	NA	NA	NA	NA	NA	NA	NA	NA	NA	NA
97	AF380336.1	circular	4640	Bacteria	Firmicutes	Bacilli	Lactobacillales	Streptococcaceae	Lactococcus	Lactococcus lactis	Lactococcus lactis plasmid pCRL291.1, complete sequence	NA	NA	NA	taxon:1358	NA	NA	NA	NA	genomic DNA	Lactococcus lactis	pCRL291.1	NA	NA	NA	NA	NA	NA	NA	NA	NA	NA	NA	NA	NA	NA	NA	NA	NA	NA	NA	NA	NA	NA	NA	NA	NA	NA	NA
98	AF386526.1	circular	221618	Bacteria	Proteobacteria	Gammaproteobacteria	Enterobacterales	Enterobacteriaceae	Shigella	Shigella flexneri	Shigella flexneri 2a str. 301 virulence plasmid pCP301, complete sequence	NA	NA	NA	taxon:198214	NA	NA	NA	NA	genomic DNA	Shigella flexneri 2a str. 301	pCP301	301	NA	NA	NA	NA	NA	NA	NA	2a	NA	NA	NA	NA	NA	NA	NA	NA	NA	NA	NA	NA	NA	NA	NA	NA	NA	NA
99	AF416330.1	circular	76093	Bacteria	Proteobacteria	Alphaproteobacteria	Rhodobacterales	Rhodobacteraceae	Ruegeria	Ruegeria sp. PR1b	Ruegeria sp. PR1b plasmid pSD20, complete sequence	NA	NA	NA	taxon:185588	NA	NA	NA	NA	genomic DNA	Ruegeria sp. PR1b	pSD20	PR1b	NA	NA	NA	NA	NA	NA	NA	NA	NA	NA	NA	NA	NA	NA	NA	NA	NA	NA	NA	NA	NA	NA	NA	NA	NA	NA
100	AF416331.1	circular	148650	Bacteria	Proteobacteria	Alphaproteobacteria	Rhodobacterales	Rhodobacteraceae	Ruegeria	Ruegeria sp. PR1b	Ruegeria sp. PR1b plasmid pSD25, complete sequence	NA	NA	NA	taxon:185588	NA	NA	NA	NA	genomic DNA	Ruegeria sp. PR1b	pSD25	PR1b	NA	NA	NA	NA	NA	NA	NA	NA	NA	NA	NA	NA	NA	NA	NA	NA	NA	NA	NA	NA	NA	NA	NA	NA	NA	NA
101	AF438419.1	circular	12959	Bacteria	Firmicutes	Bacilli	Lactobacillales	Lactobacillaceae	Lactobacillus	Lactobacillus sakei	Lactobacillus sakei plasmid pRV500, complete sequence	NA	NA	NA	taxon:1599	NA	NA	NA	NA	genomic DNA	Lactobacillus sakei	pRV500	NA	NA	NA	NA	NA	NA	NA	NA	NA	NA	NA	NA	NA	NA	NA	NA	NA	NA	NA	NA	NA	NA	NA	NA	NA	NA	NA
102	AF441790.2	circular	46366	Bacteria	Cyanobacteria	NA	Synechococcales	Synechococcaceae	Synechococcus	Synechococcus elongatus	Synechococcus elongatus PCC 7942 plasmid pANL, complete sequence	NA	NA	NA	taxon:1140	NA	NA	NA	NA	genomic DNA	Synechococcus elongatus PCC 7942	pANL	PCC 7942	NA	NA	NA	NA	NA	NA	NA	NA	NA	NA	NA	NA	NA	NA	NA	NA	NA	NA	NA	NA	NA	NA	NA	NA	NA	NA
103	AF447808.1	circular	32433	Bacteria	Proteobacteria	Gammaproteobacteria	Pasteurellales	Pasteurellaceae	Haemophilus	Haemophilus influenzae	Haemophilus influenzae biotype aegyptius plasmid pF3031, complete sequence	NA	NA	NA	taxon:725	NA	NA	NA	NA	genomic DNA	Haemophilus influenzae biotype aegyptius	pF3031	NA	NA	NA	NA	NA	isolated from Brazilian purpuric fever clone; biotype: aegyptius	NA	NA	NA	NA	NA	NA	NA	NA	NA	NA	NA	NA	NA	NA	NA	NA	NA	NA	NA	NA	NA
104	AF459640.1	circular	2134	Bacteria	Firmicutes	Bacilli	Lactobacillales	Lactobacillaceae	Lactobacillus	Lactobacillus paraplantarum	Lactobacillus paraplantarum plasmid pC7, complete sequence	NA	NA	NA	taxon:60520	NA	NA	NA	NA	genomic DNA	Lactobacillus paraplantarum	pC7	NA	NA	NA	NA	NA	NA	NA	NA	NA	NA	NA	NA	NA	NA	NA	NA	NA	NA	NA	NA	NA	NA	NA	NA	NA	NA	NA
105	AF469112.1	circular	10970	Bacteria	Proteobacteria	Epsilonproteobacteria	Campylobacterales	Helicobacteraceae	Helicobacter	Helicobacter pylori	Helicobacter pylori plasmid pHel4 complete sequence	NA	NA	NA	taxon:210	NA	NA	NA	NA	genomic DNA	Helicobacter pylori	pHel4	P8	NA	NA	NA	NA	NA	NA	NA	NA	NA	NA	NA	NA	NA	NA	NA	NA	NA	NA	NA	NA	NA	NA	NA	NA	NA	NA
106	AF469113.1	circular	18291	Bacteria	Proteobacteria	Epsilonproteobacteria	Campylobacterales	Helicobacteraceae	Helicobacter	Helicobacter pylori	Helicobacter pylori plasmid pHel5 complete sequence	NA	NA	NA	taxon:210	NA	NA	NA	NA	genomic DNA	Helicobacter pylori	pHel5	NA	NA	NA	NA	NA	NA	NA	NA	NA	NA	NA	NA	NA	NA	NA	NA	NA	NA	NA	NA	NA	NA	NA	NA	NA	NA	NA
107	AF479770.1	circular	5949	Bacteria	Actinobacteria	Actinobacteria	Corynebacteriales	Corynebacteriaceae	Corynebacterium	Corynebacterium glutamicum	Corynebacterium glutamicum 227 plasmid pXZ608, complete sequence	NA	NA	NA	taxon:1718	NA	NA	NA	NA	genomic DNA	Corynebacterium glutamicum	pXZ608	227	NA	NA	NA	NA	a cryptic plasmid that utilizes rolling circle replication	NA	NA	NA	NA	NA	NA	NA	NA	NA	NA	NA	NA	NA	NA	NA	NA	NA	NA	NA	NA	NA
108	AF479774.1	circular	11354	Bacteria	Proteobacteria	Gammaproteobacteria	Enterobacterales	Enterobacteriaceae	Klebsiella	Klebsiella pneumoniae	Klebsiella pneumoniae plasmid pJHCMW1, complete sequence	NA	NA	NA	taxon:573	NA	NA	NA	NA	genomic DNA	Klebsiella pneumoniae	pJHCMW1	NA	NA	NA	NA	NA	NA	NA	NA	NA	NA	NA	NA	NA	NA	NA	NA	NA	NA	NA	NA	NA	NA	NA	NA	NA	NA	NA
109	AF482428.1	circular	2697	Bacteria	Proteobacteria	Alphaproteobacteria	Rhodobacterales	Rhodobacteraceae	Paracoccus	Paracoccus pantotrophus	Paracoccus pantotrophus plasmid pWKS1, complete sequence	NA	NA	NA	taxon:82367	NA	NA	NA	NA	genomic DNA	Paracoccus pantotrophus	pWKS1	DSM 11072	NA	NA	NA	NA	NA	NA	NA	NA	NA	NA	NA	NA	NA	NA	NA	NA	NA	NA	NA	NA	NA	NA	NA	NA	NA	NA
110	AF486522.1	circular	14875	Bacteria	Actinobacteria	Actinobacteria	Corynebacteriales	Corynebacteriaceae	Corynebacterium	Corynebacterium jeikeium	Corynebacterium jeikeium plasmid pB85766, complete sequence	NA	NA	NA	taxon:38289	NA	NA	NA	NA	genomic DNA	Corynebacterium jeikeium	pB85766	B85766	NA	NA	NA	NA	NA	NA	NA	NA	NA	NA	NA	NA	NA	NA	NA	NA	NA	NA	NA	NA	NA	NA	NA	NA	NA	NA
111	AF491307.2	circular	83042	Bacteria	Proteobacteria	Gammaproteobacteria	Pseudomonadales	Pseudomonadaceae	Pseudomonas	Pseudomonas putida	Pseudomonas putida NCIB 9816-4 plasmid pDTG1, complete sequence	NA	NA	NA	taxon:303	NA	NA	NA	NA	genomic DNA	Pseudomonas putida	pDTG1	NCIB 9816-4	NA	NA	NA	NA	NA	NA	NA	NA	NA	NA	NA	NA	NA	NA	NA	NA	NA	NA	NA	NA	NA	NA	NA	NA	NA	NA
112	AF492560.1	circular	15100	Bacteria	Actinobacteria	Actinobacteria	Corynebacteriales	Corynebacteriaceae	Corynebacterium	Corynebacterium diphtheriae	Corynebacterium diphtheriae plasmid pNG2, complete sequence	NA	NA	NA	taxon:1717	NA	NA	NA	NA	genomic DNA	Corynebacterium diphtheriae	pNG2	S601	NA	NA	NA	NA	NA	NA	NA	NA	NA	NA	NA	NA	NA	Escherichia coli JM109	NA	NA	NA	NA	NA	NA	NA	NA	NA	NA	NA	NA
113	AF497970.1	linear	8401	Bacteria	Proteobacteria	Gammaproteobacteria	Enterobacterales	Enterobacteriaceae	Shigella	Shigella sonnei	Shigella sonnei plasmid pKKTET7, complete sequence	NA	NA	NA	taxon:624	NA	NA	NA	NA	genomic DNA	Shigella sonnei	pKKTET7	NA	NA	NA	NA	NA	isolated from patients watery diarrhea	NA	NA	NA	NA	NA	NA	NA	NA	NA	NA	NA	NA	NA	NA	NA	NA	NA	NA	NA	NA	NA
114	AF511037.1	circular	3176	Bacteria	Firmicutes	Bacilli	Lactobacillales	Enterococcaceae	Enterococcus	Enterococcus faecium	Enterococcus faecium plasmid pEFR, complete sequence	NA	NA	NA	taxon:1352	NA	NA	NA	NA	genomic DNA	Enterococcus faecium	pEFR	NA	NA	NA	NA	NA	NA	NA	NA	NA	NA	NA	NA	NA	NA	NA	NA	NA	NA	NA	NA	NA	NA	NA	NA	NA	NA	NA
115	AF516141.1	linear	6361	Bacteria	Cyanobacteria	NA	Nostocales	Nostocaceae	Nostoc	Nostoc sp. PCC 7524	Nostoc sp. PCC 7524 plasmid pDU1, complete sequence	NA	NA	NA	taxon:28072	NA	NA	NA	NA	genomic DNA	Nostoc sp. PCC 7524	pDU1	PCC 7524	NA	NA	NA	NA	NA	NA	NA	NA	NA	NA	NA	NA	NA	NA	NA	NA	NA	NA	NA	NA	NA	NA	NA	NA	NA	NA
116	AF527822.1	circular	5622	Bacteria	Proteobacteria	Gammaproteobacteria	Enterobacterales	Enterobacteriaceae	Enterobacter	Enterobacter sp. RFL1396	Enterobacter sp. RFL1396 plasmid pEsp1396, complete sequence	NA	NA	NA	taxon:211595	NA	NA	NA	NA	genomic DNA	Enterobacter sp. RFL1396	pEsp1396	RFL1396	NA	NA	NA	NA	NA	NA	NA	NA	NA	NA	NA	NA	NA	NA	NA	NA	NA	NA	NA	NA	NA	NA	NA	NA	NA	NA
117	AF533985.1	circular	12855	Bacteria	Actinobacteria	Actinobacteria	Streptomycetales	Streptomycetaceae	Streptomyces	Streptomyces sp. EN27	Streptomyces sp. EN27 plasmid pEN2701, complete sequence	NA	NA	NA	taxon:211464	NA	NA	NA	NA	genomic DNA	Streptomyces sp. EN27	pEN2701	EN27	NA	NA	NA	NA	NA	NA	NA	NA	NA	NA	NA	NA	NA	NA	NA	NA	NA	NA	NA	NA	NA	NA	NA	NA	NA	NA
118	AF546865.2	circular	3353	Bacteria	Firmicutes	Bacilli	Lactobacillales	Leuconostocaceae	Weissella	Weissella cibaria	Weissella cibaria plasmid pKLCB, complete sequence	NA	NA	NA	taxon:137591	NA	NA	Kimchi (traditional Korean food)	NA	genomic DNA	Weissella cibaria	pKLCB	NA	NA	NA	NA	NA	small cryptic plasmid; middle-sized of three small cryptic plasmids in Weissella cibaria	NA	NA	NA	NA	NA	NA	NA	NA	NA	NA	NA	NA	NA	NA	NA	NA	NA	NA	NA	NA	NA
119	AF550415.2	circular	89468	Bacteria	Proteobacteria	Gammaproteobacteria	Enterobacterales	Enterobacteriaceae	Citrobacter	Citrobacter freundii	Citrobacter freundii plasmid pCTX-M3, complete sequence	NA	NA	NA	taxon:546	NA	NA	NA	NA	genomic DNA	Citrobacter freundii	pCTX-M3	NA	NA	NA	NA	NA	NA	NA	NA	NA	NA	NA	NA	NA	NA	NA	NA	NA	NA	NA	NA	NA	NA	NA	NA	NA	NA	NA
120	AF550679.1	circular	125491	Bacteria	Proteobacteria	Gammaproteobacteria	Enterobacterales	Enterobacteriaceae	Escherichia	Escherichia coli	Escherichia coli plasmid p1658/97, complete sequence	NA	NA	NA	taxon:562	NA	NA	NA	NA	genomic DNA	Escherichia coli	p1658/97	NA	NA	NA	NA	NA	NA	NA	NA	NA	NA	NA	NA	NA	NA	NA	NA	NA	NA	NA	NA	NA	NA	NA	NA	NA	NA	NA
121	AJ224743.1	circular	1921	Bacteria	Proteobacteria	Gammaproteobacteria	Pseudomonadales	Moraxellaceae	Moraxella	Moraxella sp. TA144	Moraxella sp. TA144 plasmid pTA144 Up, complete sequence	NA	NA	NA	taxon:77152	NA	NA	NA	NA	genomic DNA	Moraxella sp. TA144	pTA144 Up	NA	NA	NA	NA	TA144	NA	NA	NA	NA	NA	NA	NA	NA	NA	NA	NA	NA	NA	NA	NA	NA	NA	NA	NA	NA	NA	NA
122	AJ293027.1	circular	10687	Bacteria	NA	NA	NA	NA	NA	uncultured eubacterium pIE1115	Uncultured eubacterium pIE1115 plasmid pIE1115, complete sequence	NA	NA	Germany	taxon:136143	NA	NA	NA	NA	genomic DNA	uncultured eubacterium pIE1115	pIE1115	NA	NA	NA	NA	NA	The IncQ-like plasmid was isolated by conjugation between unknown bacteria in piggery manure and an Escherichia coli K-12 recipient strain.	NA	NA	NA	NA	NA	NA	NA	NA	Escherichia coli K-12		NA	NA	NA	NA	NA	NA	NA	NA	NA	NA	NA
123	AJ297913.2	circular	45319	Bacteria	NA	NA	NA	NA	NA	uncultured bacterium	Uncultured bacterium plasmid pIPO2T, complete sequence	NA	NA	NA	taxon:77133	NA	NA	wheat rhizosphere	NA	genomic DNA	uncultured bacterium	pIPO2T	NA	NA	NA	NA	NA	NA	NA	NA	NA	NA	NA	NA	NA	NA	NA		NA	NA	NA	NA	NA	NA	NA	NA	NA	NA	NA
124	AJ304453.1	circular	55578	Bacteria	NA	NA	NA	NA	NA	uncultured bacterium	Uncultured bacterium plasmid pSB102 complete genome	NA	NA	NA	taxon:77133	NA	NA	NA	NA	genomic DNA	uncultured bacterium	pSB102	NA	NA	NA	NA	NA	conjugative broad-host range, exogenously isolated from alfalfa rhizosphere	NA	NA	NA	NA	NA	NA	NA	NA	Sinorhizobium meliloti strain FP2		NA	NA	NA	NA	NA	NA	NA	NA	NA	NA	NA
125	AJ311718.1	circular	4379	Bacteria	Proteobacteria	Gammaproteobacteria	Pseudomonadales	Moraxellaceae	Acinetobacter	Acinetobacter sp. EB104	Acinetobacter sp. EB104, plasmid pAC450, complete genome	NA	NA	Germany	taxon:156739	NA	NA	NA	NA	genomic DNA	Acinetobacter sp. EB104	pAC450	EB104	NA	NA	NA	NA	NA	NA	NA	NA	NA	NA	NA	NA	NA	NA	NA	NA	NA	NA	NA	NA	NA	NA	NA	NA	NA	NA
126	AJ428837.1	circular	4340	Bacteria	Proteobacteria	Alphaproteobacteria	Rhodospirillales	Acetobacteraceae	Gluconobacter	Gluconobacter oxydans	Gluconobacter oxydans DSM 3504 plasmid pGO128, complete sequence	NA	NA	NA	taxon:1288313	NA	NA	NA	NA	genomic DNA	Gluconobacter oxydans DSM 3504	pGO128	DSM 3504	NA	NA	NA	NA	NA	NA	NA	NA	NA	NA	NA	NA	NA	NA	NA	NA	NA	NA	NA	NA	NA	NA	NA	NA	NA	NA
127	AJ431260.1	circular	79370	Bacteria	NA	NA	NA	NA	NA	uncultured bacterium	Uncultured bacterium plasmid pB4 complete genome	NA	NA	NA	taxon:77133	NA	NA	activated sludge	NA	genomic DNA	uncultured bacterium	pB4	NA	NA	NA	NA	NA	NA	NA	NA	NA	NA	NA	NA	NA	NA	Pseudomonas sp. B13		NA	NA	NA	NA	NA	NA	NA	NA	NA	NA	NA
128	AJ493278.1	circular	9935	Bacteria	Firmicutes	Bacilli	Lactobacillales	Leuconostocaceae	Leuconostoc	Leuconostoc citreum	Leuconostoc citreum pLC22R plasmid, complete genome	NA	NA	NA	taxon:33964	NA	NA	NA	NA	genomic DNA	Leuconostoc citreum	pLC22R	22R	NA	NA	NA	NA	NA	NA	NA	NA	NA	NA	NA	NA	NA	NA	NA	NA	NA	NA	NA	NA	NA	NA	NA	NA	NA	NA
129	AJ576039.1	circular	101016	Bacteria	Actinobacteria	Actinobacteria	Corynebacteriales	Gordoniaceae	Gordonia	Gordonia westfalica	Gordonia westfalica strain DSM44215T plasmid pKB1 complete genome	NA	NA	NA	taxon:158898	NA	NA	NA	NA	genomic DNA	Gordonia westfalica	pKB1	type strain: DSM 44215	NA	NA	NA	NA	extrachromosomal	NA	NA	NA	NA	NA	NA	NA	NA	NA	NA	NA	NA	NA	NA	NA	NA	NA	NA	NA	NA	NA
130	AJ577854.1	circular	9150	Bacteria	Firmicutes	Bacilli	Bacillales	Bacillaceae	Bacillus	Bacillus licheniformis	Bacillus licheniformis plasmid pFL5, complete plasmid sequence	NA	NA	Italy	taxon:1402	NA	NA	pasture land	NA	genomic DNA	Bacillus licheniformis	pFL5	FL5	NA	NA	NA	NA	NA	NA	NA	NA	NA	NA	NA	NA	NA	NA	NA	NA	NA	NA	NA	NA	NA	NA	NA	NA	NA	NA
131	AJ577855.1	circular	7853	Bacteria	Firmicutes	Bacilli	Bacillales	Bacillaceae	Bacillus	Bacillus licheniformis	Bacillus licheniformis plasmid pFL7, complete plasmid sequence	NA	NA	Italy	taxon:1402	NA	NA	pasture land	NA	genomic DNA	Bacillus licheniformis	pFL7	FL7	NA	NA	NA	NA	NA	NA	NA	NA	NA	NA	NA	NA	NA	NA	NA	NA	NA	NA	NA	NA	NA	NA	NA	NA	NA	NA
132	AJ579365.1	linear	17108	Bacteria	Firmicutes	Bacilli	Bacillales	Staphylococcaceae	Staphylococcus	Staphylococcus sciuri	Staphylococcus sciuri pSCFS1 plasmid, complete sequence	NA	NA	Germany:Bavaria	taxon:1296	NA	NA	cattle	NA	genomic DNA	Staphylococcus sciuri	pSCFS1	NA	NA	NA	NA	NA	NA	NA	NA	NA	NA	NA	NA	NA	NA	Staphylococcus aureus RN4220	NA	NA	NA	NA	NA	NA	NA	NA	NA	NA	NA	NA
133	AJ639924.1	circular	56167	Bacteria	NA	NA	NA	NA	NA	uncultured bacterium	Uncultured bacterium plasmid pB3 complete genome	NA	NA	NA	taxon:77133	NA	NA	activated sludge	NA	genomic DNA	uncultured bacterium	pB3	NA	NA	NA	NA	NA	IncP-1beta multiresistance plasmid	NA	NA	NA	NA	NA	NA	NA	NA	Pseudomonas sp. B13		NA	NA	NA	NA	NA	NA	NA	NA	NA	NA	NA
134	AJ744860.1	circular	68869	Bacteria	NA	NA	NA	NA	NA	uncultured bacterium	uncultured bacterium pTB11 plasmid complete genome	NA	NA	NA	taxon:77133	NA	unidentified bacterium	activated sludge basin of a waste-water treatment plant	NA	genomic DNA	uncultured bacterium	pTB11	NA	NA	NA	NA	NA	NA	NA	NA	NA	NA	NA	NA	NA	NA	NA		NA	NA	NA	NA	NA	NA	NA	NA	NA	NA	NA
135	AJ748844.1	circular	3649	Bacteria	Firmicutes	Bacilli	Bacillales	Bacillaceae	Bacillus	Bacillus licheniformis	Bacillus licheniformis, plasmid pBL63.1 complete genome	NA	NA	France:Paris	taxon:1402	NA	NA	soil	NA	genomic DNA	Bacillus licheniformis	pBL63.1	63.1	NA	NA	NA	NA	NA	NA	NA	NA	NA	NA	NA	NA	NA	NA	NA	NA	NA	NA	NA	NA	NA	NA	NA	NA	NA	NA
136	AM157767.1	circular	69966	Bacteria	NA	NA	NA	NA	NA	uncultured bacterium	Uncultured bacterium IncP-1gamma plasmid QKH54 complete genome	NA	NA	United Kingdom:Wales, River Taff	taxon:77133	NA	NA	river epilithon	NA	genomic DNA	uncultured bacterium	QKH54	NA	NA	NA	NA	NA	IncP-1gamma plasmid	NA	NA	NA	NA	NA	NA	NA	NA	Escherichia coli		NA	NA	NA	NA	NA	NA	NA	NA	NA	NA	NA
137	AM167518.1	circular	3002	Bacteria	Proteobacteria	Gammaproteobacteria	Enterobacterales	Yersiniaceae	Rahnella	"Rahnella sp.WMR15"	Rahnella sp. 'WMR15' cryptic plasmid pHW15, complete sequence	NA	NA	Austria	taxon:360016	NA	NA	Pyrus communis	NA	genomic DNA	Rahnella sp. WMR15	pHW15	NA	NA	NA	NA	WMR15	NA	NA	NA	NA	NA	NA	NA	NA	NA	NA	NA	NA	NA	NA	NA	NA	NA	NA	NA	NA	NA	NA
138	AM183225.1	circular	14969	Bacteria	Proteobacteria	Gammaproteobacteria	Pasteurellales	Pasteurellaceae	Bibersteinia	Bibersteinia trehalosi	Pasteurella trehalosi plasmid pCCK13698, complete genome, isolate 13698	NA	NA	France	taxon:47735	NA	NA	cattle	NA	genomic DNA	Bibersteinia trehalosi	pCCK13698	NA	NA	NA	NA	13698	NA	NA	NA	NA	NA	NA	NA	NA	NA	NA	NA	NA	NA	NA	NA	NA	NA	NA	NA	NA	NA	NA
139	AM235768.1	circular	425094	Bacteria	Proteobacteria	Gammaproteobacteria	Pseudomonadales	Pseudomonadaceae	Pseudomonas	Pseudomonas fluorescens	Pseudomonas fluorescens SBW25 plasmid pQBR103, complete genome	NA	NA	NA	taxon:216595	NA	NA	NA	NA	genomic DNA	Pseudomonas fluorescens SBW25	pQBR103	SBW25	NA	NA	NA	NA	NA	NA	NA	NA	NA	NA	NA	NA	NA	NA	NA	NA	NA	NA	NA	NA	NA	NA	NA	NA	NA	NA
140	AM261282.1	circular	54383	Bacteria	NA	NA	NA	NA	NA	uncultured bacterium	Uncultured bacterium IncP-1 plasmid pKJK5 complete sequence	NA	NA	NA	taxon:77133	NA	NA	exogenous isolation from soil	NA	genomic DNA	uncultured bacterium	pKJK5	NA	NA	NA	NA	NA	IncP-1 plasmid	NA	NA	NA	NA	NA	NA	NA	NA	Escherichia coli MC1061		NA	NA	NA	NA	NA	NA	NA	NA	NA	NA	NA
141	AM286416.1	circular	67721	Bacteria	Proteobacteria	Gammaproteobacteria	Enterobacterales	Yersiniaceae	Yersinia	Yersinia enterocolitica	Yersinia enterocolitica subsp. enterocolitica 8081 plasmid pYVe8081 complete genome	NA	NA	NA	taxon:393305	NA	NA	NA	NA	genomic DNA	Yersinia enterocolitica subsp. enterocolitica 8081	pYVe8081	8081	NA	enterocolitica	NA	NA	NA	NA	NA	NA	NA	NA	NA	NA	NA	NA	NA	NA	NA	NA	NA	NA	NA	NA	NA	NA	NA	NA
142	AM412318.1	circular	16344	Bacteria	Firmicutes	Clostridia	Clostridiales	Clostridiaceae	Clostridium	Clostridium botulinum	Clostridium botulinum A str. ATCC 3502 plasmid pBOT3502 complete genome	NA	NA	NA	taxon:413999	NA	NA	NA	NA	genomic DNA	Clostridium botulinum A str. ATCC 3502	pBOT3502	ATCC 3502	NA	NA	NA	NA	NA	NA	NA	NA	NA	NA	NA	NA	NA	NA	NA	NA	NA	NA	NA	NA	NA	NA	NA	NA	NA	NA
143	AM886293.1	circular	168113	Bacteria	Proteobacteria	Gammaproteobacteria	Enterobacterales	Enterobacteriaceae	Escherichia	Escherichia coli	Escherichia coli 1540 plasmid pIP1206 complete genome	NA	NA	NA	taxon:562	NA	NA	NA	NA	genomic DNA	Escherichia coli	pIP1206	NA	NA	NA	NA	NA	NA	NA	NA	NA	NA	NA	NA	NA	NA	NA	NA	NA	NA	NA	NA	NA	NA	NA	NA	NA	NA	NA
144	AM901564.1	circular	39792	Bacteria	Proteobacteria	Gammaproteobacteria	Enterobacterales	Morganellaceae	Providencia	Providencia rettgeri	Providencia rettgeri plasmid R7K, complete sequence	NA	NA	NA	taxon:587	NA	NA	NA	NA	genomic DNA	Providencia rettgeri	R7K	NA	NA	NA	NA	NA	IncW plasmid	NA	NA	NA	NA	NA	NA	NA	NA	NA	NA	NA	NA	NA	NA	NA	NA	NA	NA	NA	NA	NA
145	AY004211.1	circular	7610	Bacteria	Actinobacteria	Actinobacteria	Micrococcales	Brevibacteriaceae	Brevibacterium	Brevibacterium linens	Brevibacterium linens plasmid LIM, complete sequence	NA	NA	NA	taxon:1703	NA	NA	NA	NA	genomic DNA	Brevibacterium linens	LIM	NA	NA	NA	NA	NA	NA	NA	NA	NA	NA	NA	NA	NA	NA	NA	NA	NA	NA	NA	NA	NA	NA	NA	NA	NA	NA	NA
146	AY026767.1	circular	3854	Bacteria	Firmicutes	Bacilli	Lactobacillales	Streptococcaceae	Lactococcus	Lactococcus lactis	Lactococcus lactis subsp. cremoris strain P8-2-47 plasmid pBM02, complete sequence	NA	NA	NA	taxon:1359	NA	NA	NA	NA	genomic DNA	Lactococcus lactis subsp. cremoris	pBM02	P8-2-47	NA	cremoris	NA	NA	one of five different endogenous plasmids of Lactococcus lactis subsp. cremoris strain P8-2-47	NA	NA	NA	NA	NA	NA	NA	NA	NA	NA	NA	NA	NA	NA	NA	NA	NA	NA	NA	NA	NA
147	AY027524.1	circular	22437	Bacteria	Actinobacteria	Actinobacteria	Frankiales	Frankiaceae	Frankia	Frankia sp. CpI1	Frankia sp. CpI1 plasmid pFQ12, complete plasmid sequence	NA	NA	NA	taxon:1856	NA	NA	NA	NA	genomic DNA	Frankia sp. CpI1	pFQ12	NA	NA	NA	NA	NA	NA	NA	NA	NA	NA	NA	NA	NA	NA	NA	NA	NA	NA	NA	NA	NA	NA	NA	NA	NA	NA	NA
148	AY033392.1	circular	4139	Bacteria	Firmicutes	Bacilli	Lactobacillales	Streptococcaceae	Streptococcus	Streptococcus thermophilus	Streptococcus thermophilus plasmid pER13, complete sequence	NA	NA	NA	taxon:1308	NA	NA	NA	NA	genomic DNA	Streptococcus thermophilus	pER13	NA	NA	NA	NA	NA	NA	NA	NA	NA	NA	NA	NA	NA	NA	NA	NA	NA	NA	NA	NA	NA	NA	NA	NA	NA	NA	NA
149	AY033498.1	circular	3564	Bacteria	Proteobacteria	Gammaproteobacteria	Enterobacterales	Enterobacteriaceae	Klebsiella	Klebsiella sp. KCL-2	Klebsiella sp. KCL-2 plasmid pMGD2, complete sequence	NA	NA	NA	taxon:160057	NA	NA	NA	NA	genomic DNA	Klebsiella sp. KCL-2	pMGD2	KCL-2	NA	NA	NA	NA	isolated from sea water polluted with crude oil	NA	NA	NA	NA	NA	NA	NA	NA	NA	NA	NA	NA	NA	NA	NA	NA	NA	NA	NA	NA	NA
150	AY033516.1	circular	7086	Bacteria	Proteobacteria	Gammaproteobacteria	Enterobacterales	Enterobacteriaceae	Klebsiella	Klebsiella pneumoniae	Klebsiella pneumoniae plasmid pIP843, complete sequence	NA	NA	NA	taxon:573	NA	NA	NA	NA	genomic DNA	Klebsiella pneumoniae	pIP843	BM4493	NA	NA	NA	NA	NA	NA	NA	NA	NA	NA	NA	NA	NA	NA	NA	NA	NA	NA	NA	NA	NA	NA	NA	NA	NA	NA
151	AY034092.1	circular	50709	Bacteria	Actinobacteria	Actinobacteria	Micrococcales	Micrococcaceae	Micrococcus	Micrococcus sp. 28	Micrococcus sp. 28 plasmid pSD10, complete sequence	NA	NA	NA	taxon:161213	NA	NA	NA	NA	genomic DNA	Micrococcus sp. 28	pSD10	28	NA	NA	NA	NA	NA	NA	NA	NA	NA	NA	NA	NA	NA	NA	NA	NA	NA	NA	NA	NA	NA	NA	NA	NA	NA	NA
152	AY043298.1	circular	11851	Bacteria	Proteobacteria	Gammaproteobacteria	Aeromonadales	Aeromonadaceae	Aeromonas	Aeromonas salmonicida	Aeromonas salmonicida subsp. salmonicida plasmid pRAS3.1, complete sequence	NA	NA	NA	taxon:29491	NA	NA	NA	NA	genomic DNA	Aeromonas salmonicida subsp. salmonicida	pRAS3.1	NA	NA	salmonicida	NA	NA	R plasmid	NA	NA	NA	NA	NA	NA	NA	NA	NA	NA	NA	NA	NA	NA	NA	NA	NA	NA	NA	NA	NA
153	AY043299.1	circular	11823	Bacteria	Proteobacteria	Gammaproteobacteria	Aeromonadales	Aeromonadaceae	Aeromonas	Aeromonas salmonicida	Aeromonas salmonicida plasmid pRAS3.2, complete sequence	NA	NA	NA	taxon:645	NA	NA	NA	NA	genomic DNA	Aeromonas salmonicida	pRAS3.2	NA	NA	NA	NA	NA	atypical R plasmid	NA	NA	NA	NA	NA	NA	NA	NA	NA	NA	NA	NA	NA	NA	NA	NA	NA	NA	NA	NA	NA
154	AY046276.1	circular	50969	Bacteria	Proteobacteria	Gammaproteobacteria	Enterobacterales	Enterobacteriaceae	Salmonella	Salmonella enterica	Salmonella enterica subsp. enterica serovar Typhimurium plasmid R46, complete sequence	NA	NA	NA	taxon:90371	NA	NA	NA	NA	genomic DNA	Salmonella enterica subsp. enterica serovar Typhimurium	R46	NA	Typhimurium	enterica	NA	NA	IncN plasmid	NA	NA	NA	NA	NA	NA	NA	NA	NA	NA	NA	NA	NA	NA	NA	NA	NA	NA	NA	NA	NA
155	AY048596.1	circular	7580	Bacteria	Actinobacteria	Actinobacteria	Corynebacteriales	Corynebacteriaceae	Corynebacterium	Corynebacterium jeikeium	Corynebacterium jeikeium plasmid pCJ84, complete sequence	NA	NA	NA	taxon:38289	NA	NA	NA	NA	genomic DNA	Corynebacterium jeikeium	pCJ84	CJ84	NA	NA	NA	NA	NA	NA	NA	NA	NA	NA	NA	NA	NA	NA	NA	NA	NA	NA	NA	NA	NA	NA	NA	NA	NA	NA
156	AY048853.1	circular	4091	Bacteria	Proteobacteria	Gammaproteobacteria	Enterobacterales	Enterobacteriaceae	Salmonella	Salmonella enterica	Salmonella choleraesuis strain 79500 plasmid pSFD10, complete sequence	NA	NA	NA	taxon:28901	NA	NA	NA	NA	genomic DNA	Salmonella enterica	pSFD10	79500	NA	NA	NA	NA	NA	NA	NA	6,7:C:1,5	NA	NA	NA	NA	NA	NA	NA	NA	NA	NA	NA	NA	NA	NA	NA	NA	NA	NA
157	AY056023.1	circular	12868	Bacteria	Actinobacteria	Actinobacteria	Corynebacteriales	Mycobacteriaceae	Mycobacterium	Mycobacterium avium	Mycobacterium avium plasmid pVT2, complete sequence	NA	NA	NA	taxon:1764	NA	NA	NA	NA	genomic DNA	Mycobacterium avium	pVT2	NA	NA	NA	NA	NA	cryptic plasmid; rescued with Tn552	NA	NA	NA	NA	NA	NA	NA	NA	NA	NA	NA	NA	NA	NA	NA	NA	NA	NA	NA	NA	NA
158	AY057845.1	circular	40991	Bacteria	Proteobacteria	Alphaproteobacteria	Sphingomonadales	Sphingomonadaceae	Zymomonas	Zymomonas mobilis	Zymomonas mobilis strain ZM4 plasmid 1, complete sequence	NA	NA	NA	taxon:264203	NA	NA	NA	NA	genomic DNA	Zymomonas mobilis subsp. mobilis ZM4 = ATCC 31821	1	ZM4	NA	NA	NA	NA	NA	NA	NA	NA	NA	NA	NA	NA	NA	NA	NA	NA	NA	NA	NA	NA	NA	NA	NA	NA	NA	NA
159	AY061891.1	circular	4191	Bacteria	Actinobacteria	Actinobacteria	Corynebacteriales	Corynebacteriaceae	Corynebacterium	Corynebacterium diphtheriae	Corynebacterium diphtheriae plasmid pNGA2, complete sequence	NA	NA	NA	taxon:1717	NA	NA	NA	NA	genomic DNA	Corynebacterium diphtheriae	pNGA2	NA	NA	NA	NA	NA	NA	NA	NA	NA	NA	NA	NA	NA	NA	NA	NA	NA	NA	NA	NA	NA	NA	NA	NA	NA	NA	NA
160	AY066026.1	circular	3624	Bacteria	Actinobacteria	Actinobacteria	Bifidobacteriales	Bifidobacteriaceae	Bifidobacterium	Bifidobacterium longum	Bifidobacterium longum plasmid pB44, complete sequence	NA	NA	NA	taxon:216816	NA	Homo sapiens	NA	NA	genomic DNA	Bifidobacterium longum	pB44	VMKB44	NA	NA	NA	NA	similar to Bifidobacterium longum plasmid pKJ36 sequence deposited with GenBank Accession Number AF139129; isolated from intestine	NA	NA	NA	NA	NA	NA	NA	NA	NA	NA	NA	NA	NA	NA	NA	NA	NA	NA	NA	NA	NA
161	AY079086.1	circular	10904	Bacteria	Actinobacteria	Actinobacteria	Corynebacteriales	Corynebacteriaceae	Corynebacterium	Corynebacterium jeikeium	Corynebacterium jeikeium plasmid pK64, complete sequence	NA	NA	NA	taxon:38289	NA	NA	NA	NA	genomic DNA	Corynebacterium jeikeium	pK64	K64	NA	NA	NA	NA	NA	NA	NA	NA	NA	NA	NA	NA	NA	NA	NA	NA	NA	NA	NA	NA	NA	NA	NA	NA	NA	NA
162	AY079199.1	circular	4301	Bacteria	Proteobacteria	Gammaproteobacteria	Enterobacterales	Enterobacteriaceae	Salmonella	Salmonella enterica	Salmonella enteritidis serovar Enteritidis plasmid pP, complete sequence	NA	NA	NA	taxon:149539	NA	NA	NA	NA	genomic DNA	Salmonella enterica subsp. enterica serovar Enteritidis	pP	NA	Enteritidis	NA	NA	NA	NA	NA	NA	NA	NA	NA	NA	NA	NA	NA	NA	NA	NA	NA	NA	NA	NA	NA	NA	NA	NA	NA
163	AY082384.1	circular	4523	Bacteria	Firmicutes	Bacilli	Lactobacillales	Lactobacillaceae	Lactobacillus	Lactobacillus reuteri	Lactobacillus reuteri plasmid pTE44, complete sequence	NA	NA	NA	taxon:1598	NA	NA	NA	NA	genomic DNA	Lactobacillus reuteri	pTE44	AE78	NA	NA	NA	NA	ermB class; cryptic erythromycin resistance plasmid	NA	NA	NA	NA	NA	NA	NA	NA	NA	NA	NA	NA	NA	NA	NA	NA	NA	NA	NA	NA	NA
164	AY096004.1	circular	2061	Bacteria	Firmicutes	Bacilli	Lactobacillales	Lactobacillaceae	Lactobacillus	Lactobacillus plantarum	Lactobacillus plantarum plasmid pLP2000, complete sequence	NA	NA	NA	taxon:1590	NA	NA	NA	NA	genomic DNA	Lactobacillus plantarum	pLP2000	NA	NA	NA	NA	NA	NA	NA	NA	NA	NA	NA	NA	NA	NA	NA	NA	NA	NA	NA	NA	NA	NA	NA	NA	NA	NA	NA
165	AY096005.1	circular	9253	Bacteria	Firmicutes	Bacilli	Lactobacillales	Lactobacillaceae	Lactobacillus	Lactobacillus plantarum	Lactobacillus plantarum plasmid pLP9000, complete sequence	NA	NA	NA	taxon:1590	NA	NA	NA	NA	genomic DNA	Lactobacillus plantarum	pLP9000	NA	NA	NA	NA	NA	NA	NA	NA	NA	NA	NA	NA	NA	NA	NA	NA	NA	NA	NA	NA	NA	NA	NA	NA	NA	NA	NA
166	AY123045.1	circular	35904	Bacteria	Proteobacteria	Gammaproteobacteria	Enterobacterales	Erwiniaceae	Erwinia	Erwinia pyrifoliae	Erwinia pyrifoliae strain Ep1/96 plasmid pEP36, complete sequence	NA	NA	NA	taxon:634499	NA	Asian pear	NA	NA	genomic DNA	Erwinia pyrifoliae Ep1/96	pEP36	Ep1/96	NA	NA	NA	NA	NA	NA	NA	NA	NA	NA	NA	NA	NA	NA	NA	NA	NA	NA	NA	NA	NA	NA	NA	NA	NA	NA
167	AY123046.1	circular	1711	Bacteria	Proteobacteria	Gammaproteobacteria	Enterobacterales	Erwiniaceae	Erwinia	Erwinia amylovora	Erwinia amylovora plasmid pEA1.7, complete sequence	NA	NA	NA	taxon:552	NA	Indian Hawthorne	NA	NA	genomic DNA	Erwinia amylovora	pEA1.7	IH3-1	NA	NA	NA	NA	NA	NA	NA	NA	NA	NA	NA	NA	NA	NA	NA	NA	NA	NA	NA	NA	NA	NA	NA	NA	NA	NA
168	AY125331.1	circular	1960	Bacteria	Proteobacteria	Gammaproteobacteria	Xanthomonadales	Xanthomonadaceae	Xanthomonas	Xanthomonas citri	Xanthomonas campestris pv. glycines plasmid pAM22, complete sequence	NA	NA	NA	taxon:473421	NA	NA	NA	NA	genomic DNA	Xanthomonas citri pv. glycines	pAM22	AM2	NA	NA	NA	NA	pathovar: glycines	NA	NA	NA	NA	NA	NA	NA	NA	NA	NA	NA	NA	NA	NA	NA	NA	NA	NA	NA	NA	NA
169	AY126018.1	circular	6909	Bacteria	Firmicutes	Bacilli	Bacillales	Bacillaceae	Bacillus	Bacillus thuringiensis	Bacillus thuringiensis unknown plasmid, complete sequence	NA	NA	China	taxon:1428	NA	NA	NA	NA	genomic DNA	Bacillus thuringiensis	DAN-involved plasmid	C002	NA	NA	NA	NA	NA	NA	NA	NA	NA	NA	NA	NA	NA	NA	NA	NA	NA	NA	NA	NA	NA	NA	NA	NA	NA	NA
170	AY150274.2	circular	3539	Bacteria	Actinobacteria	Actinobacteria	Propionibacteriales	Propionibacteriaceae	Cutibacterium	Cutibacterium granulosum	Propionibacterium granulosum cryptic plasmid pPG01, complete sequence	NA	NA	NA	taxon:33011	NA	NA	NA	NA	genomic DNA	Cutibacterium granulosum	cryptic plasmid pPG01	PF283	NA	NA	NA	NA	NA	NA	NA	NA	NA	NA	NA	NA	NA	NA	NA	NA	NA	NA	NA	NA	NA	NA	NA	NA	NA	NA
171	AY167745.1	circular	3510	Bacteria	Proteobacteria	Gammaproteobacteria	Pseudomonadales	Moraxellaceae	Moraxella	Moraxella catarrhalis	Moraxella catarrhalis mobilizable plasmid pEMCJH03, complete sequence	NA	NA	NA	taxon:480	NA	NA	NA	NA	genomic DNA	Moraxella catarrhalis	pEMCJH03	NA	NA	NA	NA	NA	NA	NA	NA	NA	NA	NA	NA	NA	NA	NA	NA	NA	NA	NA	NA	NA	NA	NA	NA	NA	NA	NA
172	AY172684.1	circular	4603	Bacteria	Actinobacteria	Actinobacteria	Corynebacteriales	Corynebacteriaceae	Corynebacterium	Corynebacterium glutamicum	Corynebacterium glutamicum plasmid pAG3, complete sequence	NA	NA	NA	taxon:1718	NA	NA	NA	NA	genomic DNA	Corynebacterium glutamicum	pAG3	22220	NA	NA	NA	NA	NA	NA	NA	NA	NA	NA	NA	NA	NA	NA	NA	NA	NA	NA	NA	NA	NA	NA	NA	NA	NA	NA
173	AY172685.1	circular	6758	Bacteria	Actinobacteria	Actinobacteria	Corynebacteriales	Corynebacteriaceae	Corynebacterium	Corynebacterium glutamicum	Corynebacterium glutamicum plasmid pCG2, complete sequence	NA	NA	NA	ATCC:31832, taxon:1718	NA	NA	NA	NA	genomic DNA	Corynebacterium glutamicum	pCG2	ATCC 31832	NA	NA	NA	NA	NA	NA	NA	NA	NA	NA	NA	NA	NA	NA	NA	NA	NA	NA	NA	NA	NA	NA	NA	NA	NA	NA
174	AY172687.1	circular	19218	Bacteria	Actinobacteria	Actinobacteria	Corynebacteriales	Corynebacteriaceae	Corynebacterium	Corynebacterium glutamicum	Corynebacterium glutamicum plasmid pGA2, complete sequence	NA	NA	NA	taxon:1718	NA	NA	NA	NA	genomic DNA	Corynebacterium glutamicum	pGA2	LP-6	NA	NA	NA	NA	NA	NA	NA	NA	NA	NA	NA	NA	NA	NA	NA	NA	NA	NA	NA	NA	NA	NA	NA	NA	NA	NA
175	AY178757.1	linear	6334	Bacteria	Actinobacteria	Actinobacteria	Corynebacteriales	Nocardiaceae	Rhodococcus	Rhodococcus erythropolis	Rhodococcus erythropolis cryptic plasmid pAN12, complete sequence	NA	NA	NA	taxon:1833	NA	NA	NA	NA	genomic DNA	Rhodococcus erythropolis	pAN12	NA	NA	NA	NA	NA	cryptic plasmid	NA	NA	NA	NA	NA	NA	NA	NA	NA	NA	NA	NA	NA	NA	NA	NA	NA	NA	NA	NA	NA
176	AY188776.1	circular	1490	Bacteria	Firmicutes	Bacilli	Lactobacillales	Leuconostocaceae	Weissella	Weissella cibaria	Weissella cibaria plasmid pKLCA, complete sequence	NA	NA	NA	taxon:137591	NA	NA	Kimchi (traditional Korean food)	NA	genomic DNA	Weissella cibaria	pKLCA	NA	NA	NA	NA	NA	small cryptic plasmid; smallest of three small cryptic plasmids in Weissella cibaria	NA	NA	NA	NA	NA	NA	NA	NA	NA	NA	NA	NA	NA	NA	NA	NA	NA	NA	NA	NA	NA
177	AY210701.1	circular	3682	Bacteria	Actinobacteria	Actinobacteria	Bifidobacteriales	Bifidobacteriaceae	Bifidobacterium	Bifidobacterium longum	Bifidobacterium longum plasmid pMG1, complete sequence	NA	NA	NA	taxon:216816	NA	NA	NA	NA	genomic DNA	Bifidobacterium longum	pMG1	NA	NA	NA	NA	NA	NA	NA	NA	NA	NA	NA	NA	NA	NA	NA	NA	NA	NA	NA	NA	NA	NA	NA	NA	NA	NA	NA
178	AY211023.1	linear	96742	Bacteria	Actinobacteria	Actinobacteria	Streptomycetales	Streptomycetaceae	Streptomyces	Streptomyces violaceoruber	Streptomyces violaceoruber strain SANK95570 plasmid pSV2, complete sequence	NA	NA	NA	taxon:1935	NA	NA	NA	NA	genomic DNA	Streptomyces violaceoruber	pSV2	SANK95570	NA	NA	NA	NA	NA	NA	NA	NA	NA	NA	NA	NA	NA	NA	NA	NA	NA	NA	NA	NA	NA	NA	NA	NA	NA	NA
179	AY223810.1	linear	210205	Bacteria	Actinobacteria	Actinobacteria	Corynebacteriales	Nocardiaceae	Rhodococcus	Rhodococcus erythropolis	Rhodococcus erythropolis linear plasmid pBD2, complete sequence	NA	NA	NA	taxon:1833	NA	NA	NA	NA	genomic DNA	Rhodococcus erythropolis	pBD2	BD2	NA	NA	NA	NA	NA	NA	NA	NA	NA	NA	NA	NA	NA	NA	NA	NA	NA	NA	NA	NA	NA	NA	NA	NA	NA	NA
180	AY225511.1	linear	50410	Bacteria	Actinobacteria	Actinobacteria	Streptomycetales	Streptomycetaceae	Streptomyces	Streptomyces lividans	Streptomyces lividans strain 1326 plasmid SLP2, complete sequence	NA	NA	NA	taxon:1200984	NA	NA	NA	NA	genomic DNA	Streptomyces lividans 1326	SLP2	1326	NA	NA	NA	NA	NA	NA	NA	NA	NA	NA	NA	NA	NA	NA	NA	NA	NA	NA	NA	NA	NA	NA	NA	NA	NA	NA
181	AY228335.1	circular	37106	Bacteria	Proteobacteria	Gammaproteobacteria	Xanthomonadales	Xanthomonadaceae	Xanthomonas	Xanthomonas citri	Xanthomonas citri plasmid pXcB, complete sequence	NA	NA	NA	taxon:346	NA	NA	NA	NA	genomic DNA	Xanthomonas citri	pXcB	NA	NA	citri	NA	NA	NA	NA	NA	NA	NA	NA	NA	NA	NA	NA	NA	NA	NA	NA	NA	NA	NA	NA	NA	NA	NA	NA
182	AY230134.1	linear	7607	Bacteria	Firmicutes	Bacilli	Bacillales	Bacillaceae	Bacillus	Bacillus pumilus	Bacillus pumilus plasmid pPL7065, complete sequence	NA	NA	NA	ATCC:7065, taxon:1408	NA	NA	NA	NA	genomic DNA	Bacillus pumilus	pPL7065	ATCC 7065	NA	NA	NA	NA	plasmid pPL7065 confers production of, and immunity or resistance to, a killing activity	NA	NA	NA	NA	NA	NA	NA	NA	NA	NA	NA	NA	NA	NA	NA	NA	NA	NA	NA	NA	NA
183	AY232670.1	circular	6792	Bacteria	Proteobacteria	Gammaproteobacteria	Pasteurellales	Pasteurellaceae	Pasteurella	Pasteurella multocida	Pasteurella multocida plasmid pJR1, complete sequence	NA	NA	NA	taxon:747	NA	NA	avian	NA	genomic DNA	Pasteurella multocida	pJR1	NA	NA	NA	NA	NA	NA	NA	NA	NA	NA	NA	NA	NA	NA	NA	NA	NA	NA	NA	NA	NA	NA	NA	NA	NA	NA	NA
184	AY232671.1	circular	5252	Bacteria	Proteobacteria	Gammaproteobacteria	Pasteurellales	Pasteurellaceae	Pasteurella	Pasteurella multocida	Pasteurella multocida plasmid pJR2, complete sequence	NA	NA	NA	taxon:747	NA	NA	avian	NA	genomic DNA	Pasteurella multocida	pJR2	NA	NA	NA	NA	NA	NA	NA	NA	NA	NA	NA	NA	NA	NA	NA	NA	NA	NA	NA	NA	NA	NA	NA	NA	NA	NA	NA
185	AY250830.1	circular	3531	Bacteria	Firmicutes	Bacilli	Lactobacillales	Streptococcaceae	Streptococcus	Streptococcus thermophilus	Streptococcus thermophilus plasmid pND103, complete sequence	NA	NA	NA	taxon:1308	NA	NA	NA	NA	genomic DNA	Streptococcus thermophilus	pND103	ST2-1	NA	NA	NA	NA	NA	NA	NA	NA	NA	NA	NA	NA	NA	NA	NA	NA	NA	NA	NA	NA	NA	NA	NA	NA	NA	NA
186	AY255829.1	circular	29593	Bacteria	Proteobacteria	Gammaproteobacteria	Enterobacterales	Erwiniaceae	Erwinia	Erwinia sp. Ejp 556	Erwinia sp. Ejp 556 plasmid pEJ30, complete sequence	NA	NA	Japan	taxon:231374	NA	Pyrus pyrifolia	NA	NA	genomic DNA	Erwinia sp. Ejp 556	pEJ30	Ejp 556	NA	NA	NA	NA	NA	NA	NA	NA	NA	NA	NA	NA	NA	NA	NA	NA	NA	NA	NA	NA	NA	NA	NA	NA	NA	NA
187	AY256846.1	circular	4013	Bacteria	Proteobacteria	Epsilonproteobacteria	Campylobacterales	Campylobacteraceae	Campylobacter	Campylobacter jejuni	Campylobacter jejuni plasmid pCJ419, complete sequence	NA	NA	NA	taxon:197	NA	NA	NA	NA	genomic DNA	Campylobacter jejuni	pCJ419	NA	NA	NA	NA	NA	NA	NA	NA	NA	NA	NA	NA	NA	NA	NA	NA	NA	NA	NA	NA	NA	NA	NA	NA	NA	NA	NA
188	AY258503.2	linear	165548	Bacteria	Proteobacteria	Gammaproteobacteria	Enterobacterales	Enterobacteriaceae	Escherichia	Escherichia coli	Escherichia coli strain EH41 plasmid pO113, complete sequence	NA	NA	NA	taxon:562	NA	NA	NA	NA	genomic DNA	Escherichia coli	pO113	EH41	NA	NA	NA	NA	enterohemorrhagic strain	NA	NA	O113:H21	NA	NA	NA	NA	NA	NA	NA	NA	NA	NA	NA	NA	NA	NA	NA	NA	NA	NA
189	AY263990.1	circular	11946	Bacteria	Actinobacteria	Actinobacteria	Corynebacteriales	Corynebacteriaceae	Corynebacterium	Corynebacterium jeikeium	Corynebacterium jeikeium plasmid pA505, complete sequence	NA	NA	NA	taxon:38289	NA	NA	NA	NA	genomic DNA	Corynebacterium jeikeium	pA505	A505	NA	NA	NA	NA	NA	NA	NA	NA	NA	NA	NA	NA	NA	NA	NA	NA	NA	NA	NA	NA	NA	NA	NA	NA	NA	NA
190	AY266269.1	circular	19934	Bacteria	Actinobacteria	Actinobacteria	Corynebacteriales	Corynebacteriaceae	Corynebacterium	Corynebacterium jeikeium	Corynebacterium jeikeium plasmid pA501, complete sequence	NA	NA	NA	taxon:38289	NA	NA	NA	NA	genomic DNA	Corynebacterium jeikeium	pA501	A501	NA	NA	NA	NA	NA	NA	NA	NA	NA	NA	NA	NA	NA	NA	NA	NA	NA	NA	NA	NA	NA	NA	NA	NA	NA	NA
191	AY267368.1	circular	3955	Bacteria	Proteobacteria	Epsilonproteobacteria	Campylobacterales	Helicobacteraceae	Helicobacter	Helicobacter pylori	Helicobacter pylori plasmid pHP51, complete sequence	NA	NA	NA	taxon:210	NA	NA	NA	NA	genomic DNA	Helicobacter pylori	pHP51	NA	NA	NA	NA	NA	NA	NA	NA	NA	NA	NA	NA	NA	NA	NA	NA	NA	NA	NA	NA	NA	NA	NA	NA	NA	NA	NA
192	AY270152.1	circular	4226	Bacteria	Tenericutes	Mollicutes	Acholeplasmatales	Acholeplasmataceae	Candidatus Phytoplasma	"Peanut witches-broom phytoplasma"	Peanut witches'-broom phytoplasma plasmid pPNWB, complete sequence	NA	NA	NA	taxon:35772	NA	NA	NA	NA	genomic DNA	Peanut witches-broom phytoplasma	pPNWB	NA	NA	NA	NA	NA	NA	NA	NA	NA	NA	NA	NA	NA	NA	NA	NA	NA	NA	NA	NA	NA	NA	NA	NA	NA	NA	NA
193	AY271828.1	circular	5113	Bacteria	Proteobacteria	Gammaproteobacteria	Enterobacterales	Hafniaceae	Hafnia	Hafnia alvei	Hafnia alvei plasmid pAlvA, complete sequence	NA	NA	NA	taxon:569	NA	NA	NA	NA	genomic DNA	Hafnia alvei	pAlvA	MISC230	NA	NA	NA	NA	NA	NA	NA	NA	NA	NA	NA	NA	NA	NA	NA	NA	NA	NA	NA	NA	NA	NA	NA	NA	NA	NA
194	AY271829.1	circular	5216	Bacteria	Proteobacteria	Gammaproteobacteria	Enterobacterales	Hafniaceae	Hafnia	Hafnia alvei	Hafnia alvei plasmid pAlvB, complete sequence	NA	NA	NA	taxon:569	NA	NA	NA	NA	genomic DNA	Hafnia alvei	pAlvB	MISC261	NA	NA	NA	NA	NA	NA	NA	NA	NA	NA	NA	NA	NA	NA	NA	NA	NA	NA	NA	NA	NA	NA	NA	NA	NA	NA
195	AY277637.1	circular	3407	Bacteria	Bacteroidetes	Flavobacteriia	Flavobacteriales	Flavobacteriaceae	Flavobacterium	Flavobacterium psychrophilum	Flavobacterium psychrophilum strain D12 plasmid pCP1, complete sequence	NA	NA	NA	taxon:96345	NA	NA	NA	NA	genomic DNA	Flavobacterium psychrophilum	pCP1	D12	NA	NA	NA	NA	NA	NA	NA	NA	NA	NA	NA	NA	NA	NA	NA	NA	NA	NA	NA	NA	NA	NA	NA	NA	NA	NA
196	AY297818.1	circular	4970	Bacteria	Actinobacteria	Actinobacteria	Corynebacteriales	Nocardiaceae	Rhodococcus	Rhodococcus sp. B264-1	Rhodococcus sp. B264-1 plasmid pB264, complete sequence	NA	NA	NA	taxon:233067	NA	NA	NA	NA	genomic DNA	Rhodococcus sp. B264-1	pB264	B264-1	NA	NA	NA	NA	similar to plasmid Rhodococcus rhodochrous pKA22 sequence in GenBank Accession Number AF165152	NA	NA	NA	NA	NA	NA	NA	NA	NA	NA	NA	NA	NA	NA	NA	NA	NA	NA	NA	NA	NA
197	AY300023.1	circular	6286	Bacteria	Proteobacteria	Gammaproteobacteria	Pasteurellales	Pasteurellaceae	Avibacterium	Avibacterium paragallinarum	Haemophilus paragallinarum plasmid p250, complete sequence	NA	NA	NA	taxon:728	NA	NA	NA	NA	genomic DNA	Avibacterium paragallinarum	p250	HP250; TW1	A	NA	NA	NA	NA	NA	NA	NA	NA	NA	NA	NA	NA	NA	NA	NA	NA	NA	NA	NA	NA	NA	NA	NA	NA	NA
198	AY312234.1	circular	8144	Bacteria	Firmicutes	Bacilli	Lactobacillales	Streptococcaceae	Streptococcus	Streptococcus thermophilus	Streptococcus thermophilus plasmid pSMQ308, complete sequence	NA	NA	NA	taxon:1308	NA	NA	NA	NA	genomic DNA	Streptococcus thermophilus	pSMQ308	NA	NA	NA	NA	NA	NA	NA	NA	NA	NA	NA	NA	NA	NA	NA	NA	NA	NA	NA	NA	NA	NA	NA	NA	NA	NA	NA
199	AY312235.1	circular	4449	Bacteria	Firmicutes	Bacilli	Lactobacillales	Streptococcaceae	Streptococcus	Streptococcus thermophilus	Streptococcus thermophilus plasmid pSMQ173b, complete sequence	NA	NA	NA	taxon:1308	NA	NA	NA	NA	genomic DNA	Streptococcus thermophilus	pSMQ173b	SMQ-173	NA	NA	NA	NA	NA	NA	NA	NA	NA	NA	NA	NA	NA	NA	NA	NA	NA	NA	NA	NA	NA	NA	NA	NA	NA	NA
200	AY312585.1	circular	65009	Bacteria	Proteobacteria	Gammaproteobacteria	Vibrionales	Vibrionaceae	Vibrio	Vibrio anguillarum	Vibrio anguillarum 775 plasmid pJM1, complete sequence	NA	NA	NA	taxon:882102	NA	NA	NA	NA	genomic DNA	Vibrio anguillarum 775	pJM1	775	NA	NA	NA	NA	NA	NA	NA	O1	NA	NA	NA	NA	NA	NA	NA	NA	NA	NA	NA	NA	NA	NA	NA	NA	NA	NA
201	AY325804.1	circular	11066	Bacteria	Firmicutes	Bacilli	Bacillales	Bacillaceae	Lysinibacillus	Lysinibacillus sphaericus	Lysinibacillus sphaericus plasmid pLG, complete sequence	NA	NA	NA	taxon:1421	NA	NA	NA	NA	genomic DNA	Lysinibacillus sphaericus	pLG	NA	NA	NA	NA	NA	NA	NA	NA	NA	NA	NA	NA	NA	NA	NA	NA	NA	NA	NA	NA	NA	NA	NA	NA	NA	NA	NA
202	AY333433.1	circular	3208	Bacteria	Proteobacteria	Gammaproteobacteria	Enterobacterales	Enterobacteriaceae	Salmonella	Salmonella enterica	Salmonella typhimurium plasmid pU302S, complete sequence	NA	NA	NA	taxon:90371	NA	NA	NA	NA	genomic DNA	Salmonella enterica subsp. enterica serovar Typhimurium	pU302S	G8430	NA	NA	NA	NA	phage type U302	NA	NA	NA	NA	NA	NA	NA	NA	NA	NA	NA	NA	NA	NA	NA	NA	NA	NA	NA	NA	NA
203	AY355285.1	circular	4608	Bacteria	Firmicutes	Bacilli	Bacillales	Staphylococcaceae	Staphylococcus	Staphylococcus aureus	Staphylococcus aureus plasmid pC223, complete sequence	NA	NA	NA	taxon:1280	NA	NA	NA	NA	genomic DNA	Staphylococcus aureus	pC223	NA	NA	NA	NA	NA	NA	NA	NA	NA	NA	NA	NA	NA	NA	NA	NA	NA	NA	NA	NA	NA	NA	NA	NA	NA	NA	NA
204	AY357120.1	circular	28975	Bacteria	Firmicutes	Bacilli	Lactobacillales	Streptococcaceae	Streptococcus	Streptococcus pyogenes	Streptococcus pyogenes plasmid pSM19035, complete sequence	NA	NA	NA	taxon:1314	NA	NA	NA	NA	genomic DNA	Streptococcus pyogenes	pSM19035	NA	NA	NA	NA	NA	NA	NA	NA	NA	NA	NA	NA	NA	NA	NA	NA	NA	NA	NA	NA	NA	NA	NA	NA	NA	NA	NA
205	AY359464.1	circular	5673	Bacteria	Proteobacteria	Gammaproteobacteria	Pasteurellales	Pasteurellaceae	Actinobacillus	Actinobacillus pleuropneumoniae	Actinobacillus pleuropneumoniae plasmid p9555, complete sequence	NA	NA	NA	taxon:715	NA	NA	NA	NA	genomic DNA	Actinobacillus pleuropneumoniae	p9555	NA	NA	NA	NA	NA	NA	NA	NA	NA	NA	NA	NA	NA	NA	NA	NA	NA	NA	NA	NA	NA	NA	NA	NA	NA	NA	NA
206	AY360321.1	circular	6222	Bacteria	Proteobacteria	Gammaproteobacteria	Enterobacterales	Enterobacteriaceae	Escherichia	Escherichia coli	Escherichia coli plasmid p9123, complete sequence	NA	NA	NA	taxon:562	NA	NA	NA	NA	genomic DNA	Escherichia coli	p9123	NA	NA	NA	NA	NA	antibiotic resistance plasmid	NA	NA	NA	NA	NA	NA	NA	NA	NA	NA	NA	NA	NA	NA	NA	NA	NA	NA	NA	NA	NA
207	AY362554.1	circular	5674	Bacteria	Proteobacteria	Gammaproteobacteria	Pasteurellales	Pasteurellaceae	Actinobacillus	Actinobacillus pleuropneumoniae	Actinobacillus pleuropneumoniae plasmid p9956, complete sequence	NA	NA	NA	taxon:715	NA	NA	NA	NA	genomic DNA	Actinobacillus pleuropneumoniae	p9956	NA	NA	NA	NA	NA	NA	NA	NA	NA	NA	NA	NA	NA	NA	NA	NA	NA	NA	NA	NA	NA	NA	NA	NA	NA	NA	NA
208	AY365053.1	circular	87688	Bacteria	Proteobacteria	Betaproteobacteria	Burkholderiales	Burkholderiaceae	Cupriavidus	Cupriavidus pinatubonensis	Ralstonia eutropha JMP134 plasmid pJP4, complete sequence	NA	NA	NA	taxon:264198	NA	NA	NA	NA	genomic DNA	Ralstonia eutropha JMP134	pJP4	JMP134	NA	NA	NA	NA	NA	NA	NA	NA	NA	NA	NA	NA	NA	NA	NA	NA	NA	NA	NA	NA	NA	NA	NA	NA	NA	NA
209	AY373761.1	circular	21845	Bacteria	Firmicutes	Bacilli	Bacillales	Staphylococcaceae	Staphylococcus	Staphylococcus aureus	Staphylococcus aureus plasmid pUB101, complete sequence	NA	NA	NA	taxon:1280	NA	NA	NA	NA	genomic DNA	Staphylococcus aureus	pUB101	NA	NA	NA	NA	NA	NA	NA	NA	NA	NA	NA	NA	NA	NA	NA	NA	NA	NA	NA	NA	NA	NA	NA	NA	NA	NA	NA
210	AY378100.1	circular	219385	Bacteria	Proteobacteria	Gammaproteobacteria	Enterobacterales	Enterobacteriaceae	Klebsiella	Klebsiella pneumoniae	Klebsiella pneumoniae plasmid pLVPK, complete sequence	NA	NA	NA	taxon:1244085	NA	NA	NA	NA	genomic DNA	Klebsiella pneumoniae CG43	pLVPK	CG43	NA	NA	NA	NA	large virulence plasmid	NA	NA	NA	NA	NA	NA	NA	NA	NA	NA	NA	NA	NA	NA	NA	NA	NA	NA	NA	NA	NA
211	AY386314.1	circular	19167	Bacteria	Firmicutes	Bacilli	Bacillales	Bacillaceae	Bacillus	Bacillus methanolicus	Bacillus methanolicus strain MGA3 plasmid pBM19, complete sequence	NA	NA	NA	taxon:796606	NA	NA	NA	NA	genomic DNA	Bacillus methanolicus MGA3	pBM19	MGA3	NA	NA	NA	NA	NA	NA	NA	NA	NA	NA	NA	NA	NA	NA	NA	NA	NA	NA	NA	NA	NA	NA	NA	NA	NA	NA
212	AY394560.1	circular	44707	Bacteria	Proteobacteria	Epsilonproteobacteria	Campylobacterales	Campylobacteraceae	Campylobacter	Campylobacter coli	Campylobacter coli plasmid pCC31, complete sequence	NA	NA	NA	taxon:195	NA	NA	NA	NA	genomic DNA	Campylobacter coli	pCC31	NA	NA	NA	NA	NA	NA	NA	NA	NA	NA	NA	NA	NA	NA	NA	NA	NA	NA	NA	NA	NA	NA	NA	NA	NA	NA	NA
213	AY422214.1	circular	60145	Bacteria	Proteobacteria	Gammaproteobacteria	Enterobacterales	Erwiniaceae	Erwinia	Erwinia amylovora	Erwinia amylovora strain LebB66 plasmid pEL60 complete sequence	NA	NA	Lebanon	taxon:552	NA	NA	apple	NA	genomic DNA	Erwinia amylovora	pEL60	LebB66	NA	NA	NA	NA	NA	NA	NA	NA	NA	NA	NA	NA	NA	NA	NA	NA	NA	NA	NA	NA	NA	NA	NA	NA	NA	NA
214	AY422215.1	circular	30314	Bacteria	Proteobacteria	Gammaproteobacteria	Enterobacterales	Erwiniaceae	Erwinia	Erwinia amylovora	Erwinia amylovora strain UTRJ2 plasmid pEU30 complete sequence	NA	NA	USA: Utah	taxon:552	NA	NA	apple	NA	genomic DNA	Erwinia amylovora	pEU30	UTRJ2	NA	NA	NA	NA	NA	NA	NA	NA	NA	NA	NA	NA	NA	NA	NA	NA	NA	NA	NA	NA	NA	NA	NA	NA	NA	NA
215	AY422720.1	circular	49112	Bacteria	Proteobacteria	Gammaproteobacteria	Thiotrichales	Fastidiosibacteraceae	Caedibacter	Caedibacter taeniospiralis	Caedibacter taeniospiralis plasmid pKAP298, complete sequence	NA	NA	NA	taxon:28907	NA	Paramecium tetraurelia strain 298	NA	NA	genomic DNA	Caedibacter taeniospiralis	pKAP298	NA	NA	NA	NA	NA	NA	NA	NA	NA	NA	NA	NA	NA	NA	NA	NA	NA	NA	NA	NA	NA	NA	NA	NA	NA	NA	NA
216	AY423627.1	circular	10785	Bacteria	Tenericutes	Mollicutes	Acholeplasmatales	Acholeplasmataceae	Candidatus Phytoplasma	Beet leafhopper transmitted virescence phytoplasma	Beet leafhopper transmitted virescence phytoplasma plasmid pBLTVA-1, complete sequence	NA	NA	NA	taxon:37694	NA	NA	NA	NA	genomic DNA	Beet leafhopper transmitted virescence phytoplasma	pBLTVA-1	NA	NA	NA	NA	NA	type: FC-83-13	NA	NA	NA	NA	NA	NA	NA	NA	NA	NA	NA	NA	NA	NA	NA	NA	NA	NA	NA	NA	NA
217	AY423628.1	circular	2587	Bacteria	Tenericutes	Mollicutes	Acholeplasmatales	Acholeplasmataceae	Candidatus Phytoplasma	Beet leafhopper transmitted virescence phytoplasma	Beet leafhopper transmitted virescence phytoplasma plasmid pBLTVA-2, complete sequence	NA	NA	NA	taxon:37694	NA	NA	NA	NA	genomic DNA	Beet leafhopper transmitted virescence phytoplasma	pBLTVA-2	NA	NA	NA	NA	NA	type: FC-83-13	NA	NA	NA	NA	NA	NA	NA	NA	NA	NA	NA	NA	NA	NA	NA	NA	NA	NA	NA	NA	NA
218	AY424310.1	circular	8145	Bacteria	Proteobacteria	Gammaproteobacteria	Enterobacterales	Enterobacteriaceae	Escherichia	Escherichia coli	Escherichia coli plasmid pIGAL1, complete sequence	NA	NA	NA	taxon:562	NA	NA	NA	NA	genomic DNA	Escherichia coli	pIGAL1	NA	NA	NA	NA	NA	NA	NA	NA	NA	NA	NA	NA	NA	NA	NA	NA	NA	NA	NA	NA	NA	NA	NA	NA	NA	NA	NA
219	AY425961.1	circular	2235	Bacteria	Firmicutes	Bacilli	Lactobacillales	Enterococcaceae	Enterococcus	Enterococcus faecium	Enterococcus faecium plasmid pJB01, complete sequence	NA	NA	NA	taxon:1352	NA	NA	NA	NA	genomic DNA	Enterococcus faecium	pJB01	NA	NA	NA	NA	NA	NA	NA	NA	NA	NA	NA	NA	NA	NA	NA	NA	NA	NA	NA	NA	NA	NA	NA	NA	NA	NA	NA
220	AY434675.1	circular	5568	Bacteria	Proteobacteria	Gammaproteobacteria	Pasteurellales	Pasteurellaceae	Haemophilus	Haemophilus ducreyi	Haemophilus ducreyi strain ATCC 27722 plasmid pNAD1, complete sequence	NA	NA	NA	ATCC:27722, taxon:730	NA	NA	NA	NA	genomic DNA	Haemophilus ducreyi	pNAD1	ATCC 27722	NA	NA	NA	NA	NA	NA	NA	NA	NA	NA	NA	NA	NA	NA	NA	NA	NA	NA	NA	NA	NA	NA	NA	NA	NA	NA
221	AY442931.2	circular	44420	Bacteria	Proteobacteria	Alphaproteobacteria	Rhizobiales	Rhizobiaceae	Agrobacterium	Agrobacterium tumefaciens	Agrobacterium tumefaciens plasmid pAgK84, complete sequence	NA	NA	NA	taxon:358	NA	NA	NA	NA	genomic DNA	Agrobacterium tumefaciens	pAgK84	K84	NA	NA	NA	NA	NA	NA	NA	NA	NA	NA	NA	NA	NA	NA	NA	NA	NA	NA	NA	NA	NA	NA	NA	NA	NA	NA
222	AY458016.1	circular	92353	Bacteria	Proteobacteria	Gammaproteobacteria	Enterobacterales	Enterobacteriaceae	Escherichia	Escherichia coli	Escherichia coli plasmid pC15-1a, complete sequence	NA	NA	NA	taxon:562	NA	NA	NA	NA	genomic DNA	Escherichia coli	pC15-1a	NA	NA	NA	NA	NA	NA	NA	NA	NA	NA	NA	NA	NA	NA	NA	NA	NA	NA	NA	NA	NA	NA	NA	NA	NA	NA	NA
223	AY465897.1	circular	5501	Bacteria	Proteobacteria	Gammaproteobacteria	Vibrionales	Vibrionaceae	Aliivibrio	Aliivibrio fischeri	Vibrio fischeri plasmid pES213, complete sequence	NA	NA	NA	taxon:668	NA	NA	NA	NA	genomic DNA	Aliivibrio fischeri	pES213	ES213	NA	NA	NA	NA	NA	NA	NA	NA	NA	NA	NA	NA	NA	NA	NA	NA	NA	NA	NA	NA	NA	NA	NA	NA	NA	NA
224	AY513488.1	circular	14787	Bacteria	Bacteroidetes	Flavobacteriia	Flavobacteriales	Flavobacteriaceae	Ornithobacterium	Ornithobacterium rhinotracheale	Ornithobacterium rhinotracheale plasmid pOR1, complete sequence	NA	NA	NA	taxon:28251	NA	NA	NA	NA	genomic DNA	Ornithobacterium rhinotracheale	pOR1	NA	NA	NA	NA	NA	found only in two serotype K strains from the USA	NA	NA	K	NA	NA	NA	NA	NA	NA	NA	NA	NA	NA	NA	NA	NA	NA	NA	NA	NA	NA
225	AY517905.1	circular	80156	Bacteria	Proteobacteria	Gammaproteobacteria	Enterobacterales	Enterobacteriaceae	Salmonella	Salmonella enterica	Salmonella enterica strain OU7025 plasmid pOU1113, complete sequence	NA	NA	NA	taxon:28901	NA	NA	NA	NA	genomic DNA	Salmonella enterica	pOU1113	OU7025	Dublin	NA	NA	NA	SD-Fasta; virulence plasmid	NA	NA	NA	NA	NA	NA	NA	NA	NA	NA	NA	NA	NA	NA	NA	NA	NA	NA	NA	NA	NA
226	AY522431.4	circular	56634	Bacteria	Proteobacteria	Gammaproteobacteria	Enterobacterales	Enterobacteriaceae	Escherichia	Escherichia coli	Escherichia coli plasmid pMUR050, complete sequence	NA	NA	Spain	taxon:562	NA	NA	clinical isolate from a pig	NA	genomic DNA	Escherichia coli	pMUR050	NA	NA	NA	NA	NA	NA	NA	NA	NA	NA	NA	NA	NA	NA	NA	NA	NA	NA	NA	NA	NA	NA	NA	NA	NA	NA	NA
227	AY528560.1	circular	14615	Bacteria	Tenericutes	Mollicutes	Entomoplasmatales	Spiroplasmataceae	Spiroplasma	Spiroplasma kunkelii	Spiroplasma kunkelii CR2-3x plasmid pSKU146, complete sequence	NA	2004	Costa Rica	taxon:273035	NA	Zea mays L.	NA	NA	genomic DNA	Spiroplasma kunkelii CR2-3x	pSKU146	CR2-3x	NA	NA	NA	NA	NA	NA	NA	NA	NA	NA	NA	NA	NA	NA	NA	NA	NA	NA	NA	NA	NA	NA	NA	NA	NA	NA
228	AY540995.2	circular	76958	Bacteria	Proteobacteria	Betaproteobacteria	Burkholderiales	Alcaligenaceae	Achromobacter	Achromobacter denitrificans	Achromobacter xylosoxidans subsp. denitrificans strain EST4002 plasmid pEST4011, complete sequence	NA	NA	NA	taxon:32002	NA	NA	NA	NA	genomic DNA	Achromobacter denitrificans	pEST4011	EST4002	NA	NA	NA	NA	NA	NA	NA	NA	NA	NA	NA	NA	NA	NA	NA	NA	NA	NA	NA	NA	NA	NA	NA	NA	NA	NA
229	AY543071.1	circular	2348	Bacteria	Proteobacteria	Gammaproteobacteria	Enterobacterales	Enterobacteriaceae	Klebsiella	Klebsiella pneumoniae	Klebsiella pneumoniae plasmid pIGRK, complete sequence	NA	NA	NA	taxon:573	NA	NA	NA	NA	genomic DNA	Klebsiella pneumoniae	pIGRK	NA	NA	NA	NA	NA	NA	NA	NA	NA	NA	NA	NA	NA	NA	NA	NA	NA	NA	NA	NA	NA	NA	NA	NA	NA	NA	NA
230	AY543072.1	circular	2520	Bacteria	Proteobacteria	Gammaproteobacteria	Enterobacterales	Enterobacteriaceae	Klebsiella	Klebsiella pneumoniae	Klebsiella pneumoniae plasmid pIGMS31, complete sequence	NA	NA	NA	taxon:573	NA	NA	NA	NA	genomic DNA	Klebsiella pneumoniae	pIGMS31	NA	NA	NA	NA	NA	NA	NA	NA	NA	NA	NA	NA	NA	NA	NA	NA	NA	NA	NA	NA	NA	NA	NA	NA	NA	NA	NA
231	AY546103.1	circular	6521	Bacteria	Proteobacteria	Gammaproteobacteria	Enterobacterales	Erwiniaceae	Buchnera	Buchnera aphidicola	Buchnera aphidicola plasmid pleu-BTg, complete sequence	NA	NA	NA	taxon:9	NA	Tuberolachnus salignus	NA	NA	genomic DNA	Buchnera aphidicola	pleu-BTg	NA	NA	NA	NA	NA	endosymbiont of aphid Tuberolachnus salignus; BTg leucine plasmid	NA	NA	NA	NA	NA	NA	NA	NA	NA	NA	NA	NA	NA	NA	NA	NA	NA	NA	NA	NA	NA
232	AY572460.1	circular	1447	Bacteria	Firmicutes	Negativicutes	Selenomonadales	Selenomonadaceae	Selenomonas	Selenomonas ruminantium	Selenomonas ruminantium plasmid pSRD191, complete sequence	NA	NA	NA	taxon:971	NA	NA	NA	NA	genomic DNA	Selenomonas ruminantium	pSRD191	19	NA	NA	NA	NA	NA	NA	NA	NA	NA	NA	NA	NA	NA	NA	NA	NA	NA	NA	NA	NA	NA	NA	NA	NA	NA	NA
233	AY584531.1	circular	12120	Bacteria	Proteobacteria	Epsilonproteobacteria	Campylobacterales	Helicobacteraceae	Helicobacter	Helicobacter pylori	Helicobacter pylori plasmid pAL202, complete sequence	NA	NA	NA	taxon:210	NA	NA	NA	NA	genomic DNA	Helicobacter pylori	pAL202	AL202	NA	NA	NA	NA	NA	NA	NA	NA	NA	NA	NA	NA	NA	NA	NA	NA	NA	NA	NA	NA	NA	NA	NA	NA	NA	NA
234	AY589570.1	circular	3066	Bacteria	Proteobacteria	Gammaproteobacteria	Enterobacterales	Enterobacteriaceae	Escherichia	Escherichia coli	Escherichia coli strain 904J plasmid pEC904, complete sequence	NA	NA	NA	taxon:562	NA	NA	NA	NA	genomic DNA	Escherichia coli	pEC904	904J	NA	NA	NA	NA	pathogenic strain	NA	NA	NA	NA	NA	NA	NA	NA	NA	NA	NA	NA	NA	NA	NA	NA	NA	NA	NA	NA	NA
235	AY589571.1	circular	4669	Bacteria	Proteobacteria	Gammaproteobacteria	Enterobacterales	Enterobacteriaceae	Escherichia	Escherichia coli	Escherichia coli strain 278B plasmid pEC278, complete sequence	NA	NA	NA	taxon:562	NA	NA	NA	NA	genomic DNA	Escherichia coli	pEC278	278B	NA	NA	NA	NA	pathogenic strain	NA	NA	NA	NA	NA	NA	NA	NA	NA	NA	NA	NA	NA	NA	NA	NA	NA	NA	NA	NA	NA
236	AY603979.1	circular	46697	Bacteria	Proteobacteria	Gammaproteobacteria	Pseudomonadales	Pseudomonadaceae	Pseudomonas	Pseudomonas syringae group genomosp. 3	Pseudomonas syringae pv. maculicola strain ES4326 plasmid pPMA4326A, complete sequence	NA	NA	NA	taxon:59511	NA	NA	NA	NA	genomic DNA	Pseudomonas syringae pv. maculicola	pPMA4326A	ES4326	NA	NA	NA	NA	pathovar: maculicola	NA	NA	NA	NA	NA	NA	NA	NA	NA	NA	NA	NA	NA	NA	NA	NA	NA	NA	NA	NA	NA
237	AY603980.1	circular	40110	Bacteria	Proteobacteria	Gammaproteobacteria	Pseudomonadales	Pseudomonadaceae	Pseudomonas	Pseudomonas syringae group genomosp. 3	Pseudomonas syringae pv. maculicola strain ES4326 plasmid pPMA4326B, complete sequence	NA	NA	NA	taxon:59511	NA	NA	NA	NA	genomic DNA	Pseudomonas syringae pv. maculicola	pPMA4326B	ES4326	NA	NA	NA	NA	pathovar: maculicola	NA	NA	NA	NA	NA	NA	NA	NA	NA	NA	NA	NA	NA	NA	NA	NA	NA	NA	NA	NA	NA
238	AY603981.1	circular	4833	Bacteria	Proteobacteria	Gammaproteobacteria	Pseudomonadales	Pseudomonadaceae	Pseudomonas	Pseudomonas syringae group genomosp. 3	Pseudomonas syringae pv. maculicola strain ES4326 plasmid pPMA4326D, complete sequence	NA	NA	NA	taxon:59511	NA	NA	NA	NA	genomic DNA	Pseudomonas syringae pv. maculicola	pPMA4326D	ES4326	NA	NA	NA	NA	pathovar: maculicola	NA	NA	NA	NA	NA	NA	NA	NA	NA	NA	NA	NA	NA	NA	NA	NA	NA	NA	NA	NA	NA
239	AY603982.1	circular	8244	Bacteria	Proteobacteria	Gammaproteobacteria	Pseudomonadales	Pseudomonadaceae	Pseudomonas	Pseudomonas syringae group genomosp. 3	Pseudomonas syringae pv. maculicola strain ES4326 plasmid pPMA4326C, complete sequence	NA	NA	NA	taxon:59511	NA	NA	NA	NA	genomic DNA	Pseudomonas syringae pv. maculicola	pPMA4326C	ES4326	NA	NA	NA	NA	pathovar: maculicola	NA	NA	NA	NA	NA	NA	NA	NA	NA	NA	NA	NA	NA	NA	NA	NA	NA	NA	NA	NA	NA
240	AY603983.1	circular	4217	Bacteria	Proteobacteria	Gammaproteobacteria	Pseudomonadales	Pseudomonadaceae	Pseudomonas	Pseudomonas syringae group genomosp. 3	Pseudomonas syringae pv. maculicola strain ES4326 plasmid pPMA4326E, complete sequence	NA	NA	NA	taxon:59511	NA	NA	NA	NA	genomic DNA	Pseudomonas syringae pv. maculicola	pPMA4326E	ES4326	NA	NA	NA	NA	pathovar: maculicola	NA	NA	NA	NA	NA	NA	NA	NA	NA	NA	NA	NA	NA	NA	NA	NA	NA	NA	NA	NA	NA
241	AY608912.1	circular	6464	Bacteria	Proteobacteria	Gammaproteobacteria	Enterobacterales	Enterobacteriaceae	Escherichia	Escherichia coli	Escherichia coli plasmid pFL129, complete sequence	NA	NA	NA	taxon:562	NA	NA	NA	NA	genomic DNA	Escherichia coli	pFL129	NA	NA	NA	NA	NA	NA	NA	NA	NA	NA	NA	NA	NA	NA	NA	NA	NA	NA	NA	NA	NA	NA	NA	NA	NA	NA	NA
242	AY639886.1	circular	5360	Bacteria	Proteobacteria	Gammaproteobacteria	Enterobacterales	Enterobacteriaceae	Escherichia	Escherichia coli	Escherichia coli cryptic plasmid pRK2, complete sequence	NA	NA	NA	ATCC:9637, taxon:562	NA	NA	NA	NA	genomic DNA	Escherichia coli	pRK2	W; ATCC 9637	NA	NA	NA	NA	cryptic plasmid	NA	NA	NA	NA	NA	NA	NA	NA	NA	NA	NA	NA	NA	NA	NA	NA	NA	NA	NA	NA	NA
243	AY641454.1	circular	3672	Bacteria	Proteobacteria	Betaproteobacteria	Burkholderiales	Burkholderiaceae	Burkholderia	Burkholderia glumae	Burkholderia glumae strain BGR1 plasmid pBGA40, complete sequence	NA	NA	NA	taxon:626418	NA	NA	NA	NA	genomic DNA	Burkholderia glumae BGR1	pBGA40	BGR1	NA	NA	NA	NA	NA	NA	NA	NA	NA	NA	NA	NA	NA	NA	NA	NA	NA	NA	NA	NA	NA	NA	NA	NA	NA	NA
244	AY647243.1	circular	32628	Bacteria	Proteobacteria	Gammaproteobacteria	Pasteurellales	Pasteurellaceae	Haemophilus	Haemophilus influenzae	Haemophilus influenzae biotype aegyptius plasmid pF1947, complete sequence	NA	NA	NA	taxon:725	NA	NA	NA	NA	genomic DNA	Haemophilus influenzae biotype aegyptius	pF1947	NA	NA	NA	NA	NA	biotype: aegyptius	NA	NA	NA	NA	NA	NA	NA	NA	NA	NA	NA	NA	NA	NA	NA	NA	NA	NA	NA	NA	NA
245	AY648696.1	circular	4661	Bacteria	Firmicutes	Bacilli	Lactobacillales	Leuconostocaceae	Leuconostoc	Leuconostoc mesenteroides	Leuconostoc mesenteroides strain SY2 plasmid pFMBL1, complete sequence	NA	NA	NA	taxon:1245	NA	NA	kimchi	NA	genomic DNA	Leuconostoc mesenteroides	pFMBL1	SY2	NA	NA	NA	NA	NA	NA	NA	NA	NA	NA	NA	NA	NA	NA	NA	NA	NA	NA	NA	NA	NA	NA	NA	NA	NA	NA
246	AY737645.1	circular	1822	Bacteria	Firmicutes	Bacilli	Lactobacillales	Leuconostocaceae	Leuconostoc	Leuconostoc citreum	Leuconostoc citreum plasmid pIH01, complete sequence	NA	NA	NA	taxon:33964	NA	NA	NA	NA	genomic DNA	Leuconostoc citreum	pIH01	NA	NA	NA	NA	NA	NA	NA	NA	NA	NA	NA	NA	NA	NA	NA	NA	NA	NA	NA	NA	NA	NA	NA	NA	NA	NA	NA
247	AY780631.1	circular	15143	Bacteria	Proteobacteria	Gammaproteobacteria	Xanthomonadales	Xanthomonadaceae	Xanthomonas	Xanthomonas citri	Xanthomonas axonopodis pv. glycines strain AG1 plasmid pAG1, complete sequence	NA	NA	NA	taxon:473421	NA	NA	NA	NA	genomic DNA	Xanthomonas citri pv. glycines	pAG1	AG1	NA	NA	NA	NA	pathovar: glycines	NA	NA	NA	NA	NA	NA	NA	NA	NA	NA	NA	NA	NA	NA	NA	NA	NA	NA	NA	NA	NA
248	AY780632.1	circular	26721	Bacteria	Proteobacteria	Gammaproteobacteria	Xanthomonadales	Xanthomonadaceae	Xanthomonas	Xanthomonas citri	Xanthomonas axonopodis pv. glycines strain 8ra plasmid pXAG81, complete sequence	NA	NA	NA	taxon:473421	NA	NA	NA	NA	genomic DNA	Xanthomonas citri pv. glycines	pXAG81	8ra	NA	NA	NA	NA	pathovar: glycines	NA	NA	NA	NA	NA	NA	NA	NA	NA	NA	NA	NA	NA	NA	NA	NA	NA	NA	NA	NA	NA
249	AY780633.1	circular	1315	Bacteria	Proteobacteria	Gammaproteobacteria	Xanthomonadales	Xanthomonadaceae	Xanthomonas	Xanthomonas citri	Xanthomonas axonopodis pv. glycines strain 8ra plasmid pXAG82, complete sequence	NA	NA	NA	taxon:473421	NA	NA	NA	NA	genomic DNA	Xanthomonas citri pv. glycines	pXAG82	8ra	NA	NA	NA	NA	pathovar: glycines	NA	NA	NA	NA	NA	NA	NA	NA	NA	NA	NA	NA	NA	NA	NA	NA	NA	NA	NA	NA	NA
250	AY789019.1	circular	4288	Bacteria	Proteobacteria	Gammaproteobacteria	Vibrionales	Vibrionaceae	Photobacterium	Photobacterium phosphoreum	Photobacterium phosphoreum plasmid pPH1, complete sequence	NA	NA	NA	taxon:659	NA	NA	NA	NA	genomic DNA	Photobacterium phosphoreum	pPH1	NA	NA	NA	NA	NA	NA	NA	NA	NA	NA	NA	NA	NA	NA	NA	NA	NA	NA	NA	NA	NA	NA	NA	NA	NA	NA	NA
251	AY790924.1	circular	1821	Bacteria	Firmicutes	Bacilli	Lactobacillales	Leuconostocaceae	Leuconostoc	Leuconostoc citreum	Leuconostoc citreum plasmid pNS75, complete sequence	NA	NA	NA	taxon:33964	NA	NA	NA	NA	genomic DNA	Leuconostoc citreum	pNS75	NA	NA	NA	NA	NA	NA	NA	NA	NA	NA	NA	NA	NA	NA	NA	NA	NA	NA	NA	NA	NA	NA	NA	NA	NA	NA	NA
252	AY836798.1	circular	6611	Bacteria	Firmicutes	Bacilli	Bacillales	Bacillaceae	Bacillus	Bacillus subtilis	Bacillus subtilis plasmid pBS608, complete sequence	NA	NA	NA	taxon:1423	NA	NA	NA	NA	genomic DNA	Bacillus subtilis	pBS608	NA	NA	NA	NA	NA	NA	NA	NA	NA	NA	NA	NA	NA	NA	NA	NA	NA	NA	NA	NA	NA	NA	NA	NA	NA	NA	NA
253	AY849557.2	circular	68319	Bacteria	Firmicutes	Bacilli	Lactobacillales	Streptococcaceae	Lactococcus	Lactococcus lactis	Lactococcus lactis plasmid pGdh442, complete sequence	NA	NA	NA	taxon:1358	NA	NA	NA	NA	genomic DNA	Lactococcus lactis	pGdh442	NCDO 1867	NA	NA	NA	NA	NA	NA	NA	NA	NA	NA	NA	NA	NA	NA	NA	NA	NA	NA	NA	NA	NA	NA	NA	NA	NA	NA
254	AY855841.2	circular	67673	Bacteria	Firmicutes	Bacilli	Lactobacillales	Enterococcaceae	Enterococcus	Enterococcus faecalis	Enterococcus faecalis plasmid pCF10, complete sequence	NA	NA	NA	taxon:1351	NA	NA	NA	NA	genomic DNA	Enterococcus faecalis	pCF10	NA	NA	NA	NA	NA	NA	NA	NA	NA	NA	NA	NA	NA	NA	NA	NA	NA	NA	NA	NA	NA	NA	NA	NA	NA	NA	NA
255	AY858987.1	linear	8266	Bacteria	Proteobacteria	Betaproteobacteria	Neisseriales	Chromobacteriaceae	Laribacter	Laribacter hongkongensis	Laribacter hongkongensis plasmid pHLHK8, complete sequence	NA	NA	NA	taxon:168471	NA	NA	NA	NA	genomic DNA	Laribacter hongkongensis	pHLHK8	HLHK8	NA	NA	NA	NA	NA	NA	NA	NA	NA	NA	NA	NA	NA	NA	NA	NA	NA	NA	NA	NA	NA	NA	NA	NA	NA	NA
256	AY860110.1	circular	11188	Bacteria	Actinobacteria	Actinobacteria	Micromonosporales	Micromonosporaceae	Micromonospora	Micromonospora rosaria	Micromonospora rosaria strain SCC2095 plasmid pMR2, complete sequence	NA	NA	NA	taxon:47874	NA	NA	NA	NA	genomic DNA	Micromonospora rosaria	pMR2	SCC2095	NA	NA	NA	NA	NA	NA	NA	NA	NA	NA	NA	NA	NA	NA	NA	NA	NA	NA	NA	NA	NA	NA	NA	NA	NA	NA
257	AY862435.1	circular	5147	Bacteria	Proteobacteria	Gammaproteobacteria	Pasteurellales	Pasteurellaceae	Glaesserella	Glaesserella parasuis	Haemophilus parasuis plasmid pHS-Tet, complete sequence	NA	NA	NA	taxon:738	NA	NA	NA	NA	genomic DNA	Glaesserella parasuis	pHS-Tet	HS1543	10	NA	NA	NA	NA	NA	NA	NA	NA	NA	NA	NA	NA	NA	NA	NA	NA	NA	NA	NA	NA	NA	NA	NA	NA	NA
258	AY862436.1	circular	9462	Bacteria	Proteobacteria	Gammaproteobacteria	Pasteurellales	Pasteurellaceae	Glaesserella	Glaesserella parasuis	Haemophilus parasuis plasmid pHS-Rec, complete sequence	NA	NA	NA	taxon:738	NA	NA	NA	NA	genomic DNA	Glaesserella parasuis	pHS-Rec	NA	NA	NA	NA	NA	NA	NA	NA	NA	NA	NA	NA	NA	NA	NA	NA	NA	NA	NA	NA	NA	NA	NA	NA	NA	NA	NA
259	AY876057.1	circular	4906	Bacteria	Proteobacteria	Gammaproteobacteria	Vibrionales	Vibrionaceae	Vibrio	Vibrio cholerae	Vibrio cholerae strain SIO plasmid pSIO1, complete sequence	NA	NA	NA	taxon:666	NA	NA	NA	NA	genomic DNA	Vibrio cholerae	pSIO1	SIO	NA	NA	NA	NA	NA	NA	NA	NA	NA	NA	NA	NA	NA	NA	NA	NA	NA	NA	NA	NA	NA	NA	NA	NA	NA	NA
260	AY879342.1	circular	136694	Bacteria	Proteobacteria	Gammaproteobacteria	Enterobacterales	Enterobacteriaceae	Shigella	Shigella flexneri	Shigella flexneri plasmid pSF5, complete sequence	NA	NA	NA	taxon:623	NA	NA	NA	NA	genomic DNA	Shigella flexneri	pSF5	NA	NA	NA	NA	NA	NA	NA	NA	5	NA	NA	NA	NA	NA	NA	NA	NA	NA	NA	NA	NA	NA	NA	NA	NA	NA	NA
261	AY887963.3	circular	83042	Bacteria	Proteobacteria	Gammaproteobacteria	Pseudomonadales	Pseudomonadaceae	Pseudomonas	Pseudomonas fluorescens	Pseudomonas fluorescens strain PC20 plasmid pNAH20, complete sequence	NA	NA	NA	taxon:294	NA	NA	NA	NA	genomic DNA	Pseudomonas fluorescens	pNAH20	PC20	NA	NA	NA	NA	IncP-9 plasmid; biotype: F	NA	NA	NA	NA	NA	NA	NA	NA	NA	NA	NA	NA	NA	NA	NA	NA	NA	NA	NA	NA	NA
262	AY913943.1	circular	5159	Bacteria	Proteobacteria	Gammaproteobacteria	Enterobacterales	Enterobacteriaceae	Escherichia	Escherichia coli	Escherichia coli plasmid pColE1-H22, complete sequence	NA	NA	NA	taxon:562	NA	NA	NA	NA	genomic DNA	Escherichia coli	pColE1-H22	H22	NA	NA	NA	NA	NA	NA	NA	NA	NA	NA	NA	NA	NA	NA	NA	NA	NA	NA	NA	NA	NA	NA	NA	NA	NA	NA
263	AY929248.1	circular	8318	Bacteria	Proteobacteria	Gammaproteobacteria	Enterobacterales	Enterobacteriaceae	Escherichia	Escherichia coli	Escherichia coli plasmid pColK-K235, complete sequence	NA	NA	NA	taxon:562	NA	NA	NA	NA	genomic DNA	Escherichia coli	pColK-K235	NA	NA	NA	NA	NA	NA	NA	NA	NA	NA	NA	NA	NA	NA	NA	NA	NA	NA	NA	NA	NA	NA	NA	NA	NA	NA	NA
264	AY941098.1	circular	28878	Bacteria	Nitrospirae	Nitrospira	Nitrospirales	Nitrospiraceae	Leptospirillum	Leptospirillum ferrooxidans	Leptospirillum ferrooxidans plasmid p49879.1, complete sequence	NA	NA	NA	ATCC:49879, taxon:180	NA	NA	NA	NA	genomic DNA	Leptospirillum ferrooxidans	p49879.1	ATCC 49879	NA	NA	NA	NA	NA	NA	NA	NA	NA	NA	NA	NA	NA	NA	NA	NA	NA	NA	NA	NA	NA	NA	NA	NA	NA	NA
265	AY943952.1	circular	35159	Bacteria	Actinobacteria	Actinobacteria	Streptomycetales	Streptomycetaceae	Streptomyces	Streptomyces sp. F11	Streptomyces sp. F11 plasmid pFP11, complete sequence	NA	NA	NA	taxon:319318	NA	NA	NA	NA	genomic DNA	Streptomyces sp. F11	pFP11	F11	NA	NA	NA	NA	NA	NA	NA	NA	NA	NA	NA	NA	NA	NA	NA	NA	NA	NA	NA	NA	NA	NA	NA	NA	NA	NA
266	AY943953.1	circular	39360	Bacteria	Actinobacteria	Actinobacteria	Streptomycetales	Streptomycetaceae	Streptomyces	Streptomyces sp. FQ1	Streptomyces sp. FQ1 plasmid pFP1, complete sequence	NA	NA	NA	taxon:319426	NA	NA	NA	NA	genomic DNA	Streptomyces sp. FQ1	pFP1	FQ1	NA	NA	NA	NA	NA	NA	NA	NA	NA	NA	NA	NA	NA	NA	NA	NA	NA	NA	NA	NA	NA	NA	NA	NA	NA	NA
267	AY948116.1	circular	3316	Bacteria	Proteobacteria	Epsilonproteobacteria	Campylobacterales	Campylobacteraceae	Campylobacter	Campylobacter coli	Campylobacter coli plasmid p3384, complete sequence	NA	NA	NA	taxon:195	NA	NA	NA	NA	genomic DNA	Campylobacter coli	p3384	338	NA	NA	NA	NA	NA	NA	NA	NA	NA	NA	NA	NA	NA	NA	NA	NA	NA	NA	NA	NA	NA	NA	NA	NA	NA	NA
268	AY948117.1	circular	2426	Bacteria	Proteobacteria	Epsilonproteobacteria	Campylobacterales	Campylobacteraceae	Campylobacter	Campylobacter coli	Campylobacter coli plasmid p3386, complete sequence	NA	NA	NA	taxon:195	NA	NA	NA	NA	genomic DNA	Campylobacter coli	p3386	338	NA	NA	NA	NA	NA	NA	NA	NA	NA	NA	NA	NA	NA	NA	NA	NA	NA	NA	NA	NA	NA	NA	NA	NA	NA	NA
269	AY951984.1	circular	3084	Bacteria	Proteobacteria	Gammaproteobacteria	Pseudomonadales	Pseudomonadaceae	Pseudomonas	Pseudomonas sp. S-47	Pseudomonas sp. S-47 plasmid p47L, complete sequence	NA	NA	NA	taxon:115714	NA	NA	NA	NA	genomic DNA	Pseudomonas sp. S-47	p47L	NA	NA	NA	NA	NA	cryptic plasmid	NA	NA	NA	NA	NA	NA	NA	NA	NA	NA	NA	NA	NA	NA	NA	NA	NA	NA	NA	NA	NA
270	AY951985.1	circular	1782	Bacteria	Proteobacteria	Gammaproteobacteria	Pseudomonadales	Pseudomonadaceae	Pseudomonas	Pseudomonas sp. S-47	Pseudomonas sp. S-47 plasmid p47S, complete sequence	NA	NA	NA	taxon:115714	NA	NA	NA	NA	genomic DNA	Pseudomonas sp. S-47	p47S	NA	NA	NA	NA	NA	cryptic plasmid	NA	NA	NA	NA	NA	NA	NA	NA	NA	NA	NA	NA	NA	NA	NA	NA	NA	NA	NA	NA	NA
271	AY995189.1	circular	3041	Bacteria	Firmicutes	Bacilli	Lactobacillales	Streptococcaceae	Streptococcus	Streptococcus pyogenes	Streptococcus pyogenes strain 71-698 plasmid pDN281, complete sequence	NA	NA	NA	taxon:1314	NA	NA	NA	NA	genomic DNA	Streptococcus pyogenes	pDN281	71-698	NA	NA	NA	NA	NA	NA	NA	NA	NA	NA	NA	NA	NA	NA	NA	NA	NA	NA	NA	NA	NA	NA	NA	NA	NA	NA
272	BK008853.1	circular	24716	Bacteria	Proteobacteria	Gammaproteobacteria	Aeromonadales	Aeromonadaceae	Aeromonas	Aeromonas bestiarum	TPA_inf: Aeromonas bestiarum strain 5S9 plasmid pAb5S9, complete sequence	NA	NA	NA	taxon:105751	NA	NA	NA	NA	genomic DNA	Aeromonas bestiarum	pAb5S9	5S9	NA	NA	NA	NA	NA	NA	NA	NA	NA	NA	NA	NA	NA	NA	NA	NA	NA	NA	NA	NA	NA	NA	NA	NA	NA	NA
273	CP000037.1	circular	126697	Bacteria	Proteobacteria	Gammaproteobacteria	Enterobacterales	Enterobacteriaceae	Shigella	Shigella boydii	Shigella boydii Sb227 plasmid pSB4_227, complete sequence	NA	NA	NA	taxon:300268	NA	NA	NA	NA	genomic DNA	Shigella boydii Sb227	pSB4_227	Sb227	NA	NA	NA	NA	NA	NA	NA	4	NA	NA	NA	NA	NA	NA	NA	NA	NA	NA	NA	NA	NA	NA	NA	NA	NA	NA
274	CP000039.1	circular	214396	Bacteria	Proteobacteria	Gammaproteobacteria	Enterobacterales	Enterobacteriaceae	Shigella	Shigella sonnei	Shigella sonnei Ss046 plasmid pSS_046, complete sequence	NA	NA	NA	taxon:300269	NA	NA	NA	NA	genomic DNA	Shigella sonnei Ss046	pSS_046	Ss046	NA	NA	NA	NA	NA	NA	NA	NA	NA	NA	NA	NA	NA	NA	NA	NA	NA	NA	NA	NA	NA	NA	NA	NA	NA	NA
275	CP000047.1	circular	77112	Bacteria	Firmicutes	Bacilli	Bacillales	Bacillaceae	Bacillus	Bacillus thuringiensis	[Bacillus thuringiensis] serovar konkukian str. 97-27 plasmid pBT9727, complete sequence	NA	NA	NA	taxon:281309	NA	NA	NA	NA	genomic DNA	Bacillus thuringiensis serovar konkukian str. 97-27	pBT9727	97-27	konkukian	NA	NA	NA	NA	NA	NA	NA	NA	NA	NA	NA	NA	NA	NA	NA	NA	NA	NA	NA	NA	NA	NA	NA	NA	NA
276	CP000059.1	circular	131950	Bacteria	Proteobacteria	Gammaproteobacteria	Pseudomonadales	Pseudomonadaceae	Pseudomonas	Pseudomonas savastanoi	Pseudomonas savastanoi pv. phaseolicola 1448A plasmid large, complete sequence	NA	NA	NA	ATCC:BAA-978, taxon:264730	NA	NA	NA	NA	genomic DNA	Pseudomonas savastanoi pv. phaseolicola 1448A	large	1448A; BAA-978	NA	NA	NA	NA	pathovar: phaseolicola	NA	NA	NA	NA	NA	NA	NA	NA	NA	NA	NA	NA	NA	NA	NA	NA	NA	NA	NA	NA	NA
277	CP000160.1	circular	35505	Bacteria	Bacteroidetes	NA	Bacteroidetes Order II. Incertae sedis	Rhodothermaceae	Salinibacter	Salinibacter ruber	Salinibacter ruber DSM 13855 plasmid pSR35, complete genome	NA	NA	NA	taxon:309807	NA	NA	NA	NA	genomic DNA	Salinibacter ruber DSM 13855	pSR35	DSM 13855; M31	NA	NA	NA	NA	NA	NA	NA	NA	NA	NA	NA	NA	NA	NA	NA	NA	NA	NA	NA	NA	NA	NA	NA	NA	NA	NA
278	CP000443.1	circular	43581	Bacteria	Proteobacteria	Betaproteobacteria	Burkholderiales	Burkholderiaceae	Burkholderia	Burkholderia ambifaria	Burkholderia ambifaria AMMD plasmid 1, complete sequence	NA	NA	NA	taxon:339670	NA	NA	NA	NA	genomic DNA	Burkholderia ambifaria AMMD	1	AMMD	NA	NA	NA	NA	NA	NA	NA	NA	type strain of Burkholderia ambifaria	NA	NA	NA	NA	NA	NA	NA	NA	NA	NA	NA	NA	NA	NA	NA	NA	NA
279	CP000476.1	circular	300725	Bacteria	Actinobacteria	Actinobacteria	Micrococcales	Micrococcaceae	Paenarthrobacter	Paenarthrobacter aurescens	Paenarthrobacter aurescens TC1 plasmid pTC2, complete sequence	NA	NA	NA	ATCC:BAA-1386, taxon:290340	NA	NA	NA	NA	genomic DNA	Paenarthrobacter aurescens TC1	pTC2	TC1	NA	NA	NA	NA	NA	NA	NA	NA	NA	NA	NA	NA	NA	NA	NA	NA	NA	NA	NA	NA	NA	NA	NA	NA	NA	NA
280	CP000522.1	circular	13408	Bacteria	Proteobacteria	Gammaproteobacteria	Pseudomonadales	Moraxellaceae	Acinetobacter	Acinetobacter baumannii	Acinetobacter baumannii ATCC 17978 plasmid pAB1, complete sequence	NA	NA	NA	ATCC:17978, taxon:400667	NA	NA	NA	NA	genomic DNA	Acinetobacter baumannii ATCC 17978	pAB1	ATCC 17978	NA	NA	NA	NA	NA	NA	NA	NA	NA	NA	NA	NA	NA	NA	NA	NA	NA	NA	NA	NA	NA	NA	NA	NA	NA	NA
281	CP000523.1	circular	11302	Bacteria	Proteobacteria	Gammaproteobacteria	Pseudomonadales	Moraxellaceae	Acinetobacter	Acinetobacter baumannii	Acinetobacter baumannii ATCC 17978 plasmid pAB2, complete sequence	NA	NA	NA	ATCC:17978, taxon:400667	NA	NA	NA	NA	genomic DNA	Acinetobacter baumannii ATCC 17978	pAB2	ATCC 17978	NA	NA	NA	NA	NA	NA	NA	NA	NA	NA	NA	NA	NA	NA	NA	NA	NA	NA	NA	NA	NA	NA	NA	NA	NA	NA
282	CP000602.1	circular	158038	Bacteria	Proteobacteria	Gammaproteobacteria	Enterobacterales	Yersiniaceae	Yersinia	Yersinia ruckeri	Yersinia ruckeri strain YR71 plasmid pYR1, complete sequence	NA	NA	NA	taxon:29486	NA	NA	NA	NA	genomic DNA	Yersinia ruckeri	pYR1	YR71	NA	NA	NA	NA	NA	NA	NA	NA	NA	NA	NA	NA	NA	NA	NA	NA	NA	NA	NA	NA	NA	NA	NA	NA	NA	NA
283	CP000603.1	circular	182913	Bacteria	Proteobacteria	Gammaproteobacteria	Enterobacterales	Yersiniaceae	Yersinia	Yersinia pestis	Yersinia pestis biovar Orientalis str. IP275 plasmid pIP1202, complete sequence	NA	1995	Madagascar: Ambalavao district	taxon:373665	NA	NA	16-year-old boy with bubonic plague	NA	genomic DNA	Yersinia pestis biovar Orientalis str. IP275	pIP1202	IP275	NA	NA	NA	NA	biovar: Orientalis	NA	NA	NA	NA	NA	NA	NA	NA	NA	NA	NA	NA	NA	NA	NA	NA	NA	NA	NA	NA	NA
284	CP000617.1	circular	397868	Bacteria	Proteobacteria	Betaproteobacteria	Burkholderiales	Burkholderiaceae	Burkholderia	Burkholderia vietnamiensis	Burkholderia vietnamiensis G4 plasmid pBVIE01, complete sequence	NA	NA	NA	taxon:269482	NA	NA	NA	NA	genomic DNA	Burkholderia vietnamiensis G4	pBVIE01	G4	NA	NA	NA	NA	NA	NA	NA	NA	NA	NA	NA	NA	NA	NA	NA	NA	NA	NA	NA	NA	NA	NA	NA	NA	NA	NA
285	CP000618.1	circular	265616	Bacteria	Proteobacteria	Betaproteobacteria	Burkholderiales	Burkholderiaceae	Burkholderia	Burkholderia vietnamiensis	Burkholderia vietnamiensis G4 plasmid pBVIE02, complete sequence	NA	NA	NA	taxon:269482	NA	NA	NA	NA	genomic DNA	Burkholderia vietnamiensis G4	pBVIE02	G4	NA	NA	NA	NA	NA	NA	NA	NA	NA	NA	NA	NA	NA	NA	NA	NA	NA	NA	NA	NA	NA	NA	NA	NA	NA	NA
286	CP000619.1	circular	226679	Bacteria	Proteobacteria	Betaproteobacteria	Burkholderiales	Burkholderiaceae	Burkholderia	Burkholderia vietnamiensis	Burkholderia vietnamiensis G4 plasmid pBVIE03, complete sequence	NA	NA	NA	taxon:269482	NA	NA	NA	NA	genomic DNA	Burkholderia vietnamiensis G4	pBVIE03	G4	NA	NA	NA	NA	NA	NA	NA	NA	NA	NA	NA	NA	NA	NA	NA	NA	NA	NA	NA	NA	NA	NA	NA	NA	NA	NA
287	CP000620.1	circular	107231	Bacteria	Proteobacteria	Betaproteobacteria	Burkholderiales	Burkholderiaceae	Burkholderia	Burkholderia vietnamiensis	Burkholderia vietnamiensis G4 plasmid pBVIE04, complete sequence	NA	NA	NA	taxon:269482	NA	NA	NA	NA	genomic DNA	Burkholderia vietnamiensis G4	pBVIE04	G4	NA	NA	NA	NA	NA	NA	NA	NA	NA	NA	NA	NA	NA	NA	NA	NA	NA	NA	NA	NA	NA	NA	NA	NA	NA	NA
288	CP000621.1	circular	88096	Bacteria	Proteobacteria	Betaproteobacteria	Burkholderiales	Burkholderiaceae	Burkholderia	Burkholderia vietnamiensis	Burkholderia vietnamiensis G4 plasmid pBVIE05, complete sequence	NA	NA	NA	taxon:269482	NA	NA	NA	NA	genomic DNA	Burkholderia vietnamiensis G4	pBVIE05	G4	NA	NA	NA	NA	NA	NA	NA	NA	NA	NA	NA	NA	NA	NA	NA	NA	NA	NA	NA	NA	NA	NA	NA	NA	NA	NA
289	CP000641.1	circular	8401	Bacteria	Proteobacteria	Gammaproteobacteria	Enterobacterales	Enterobacteriaceae	Shigella	Shigella sonnei	Shigella sonnei Ss046 plasmid pSS046_spA, complete sequence	NA	NA	NA	taxon:300269	NA	NA	NA	NA	genomic DNA	Shigella sonnei Ss046	pSS046_spA	Ss046	NA	NA	NA	NA	NA	NA	NA	NA	NA	NA	NA	NA	NA	NA	NA	NA	NA	NA	NA	NA	NA	NA	NA	NA	NA	NA
290	CP000642.1	circular	5153	Bacteria	Proteobacteria	Gammaproteobacteria	Enterobacterales	Enterobacteriaceae	Shigella	Shigella sonnei	Shigella sonnei Ss046 plasmid pSS046_spB, complete sequence	NA	NA	NA	taxon:300269	NA	NA	NA	NA	genomic DNA	Shigella sonnei Ss046	pSS046_spB	Ss046	NA	NA	NA	NA	NA	NA	NA	NA	NA	NA	NA	NA	NA	NA	NA	NA	NA	NA	NA	NA	NA	NA	NA	NA	NA	NA
291	CP000643.1	circular	2101	Bacteria	Proteobacteria	Gammaproteobacteria	Enterobacterales	Enterobacteriaceae	Shigella	Shigella sonnei	Shigella sonnei Ss046 plasmid pSS046_spC, complete sequence	NA	NA	NA	taxon:300269	NA	NA	NA	NA	genomic DNA	Shigella sonnei Ss046	pSS046_spC	Ss046	NA	NA	NA	NA	NA	NA	NA	NA	NA	NA	NA	NA	NA	NA	NA	NA	NA	NA	NA	NA	NA	NA	NA	NA	NA	NA
292	CP000755.1	circular	52527	Bacteria	Proteobacteria	Gammaproteobacteria	Vibrionales	Vibrionaceae	Vibrio	Vibrio sp. 23023	Vibrio sp. 23023 plasmid p23023, complete sequence	NA	NA	NA	taxon:452803	NA	NA	NA	NA	genomic DNA	Vibrio sp. 23023	p23023	23023	NA	NA	NA	NA	NA	NA	NA	NA	NA	NA	NA	NA	NA	NA	NA	NA	NA	NA	NA	NA	NA	NA	NA	NA	NA	NA
293	CP000756.1	circular	81413	Bacteria	Proteobacteria	Gammaproteobacteria	Vibrionales	Vibrionaceae	Vibrio	Vibrio sp. 0908	Vibrio sp. 0908 plasmid p0908, complete sequence	NA	NA	NA	taxon:452802	NA	NA	NA	NA	genomic DNA	Vibrio sp. 0908	p0908	908	NA	NA	NA	NA	NA	NA	NA	NA	NA	NA	NA	NA	NA	NA	NA	NA	NA	NA	NA	NA	NA	NA	NA	NA	NA	NA
294	CP000757.1	circular	31036	Bacteria	Proteobacteria	Gammaproteobacteria	Vibrionales	Vibrionaceae	Vibrio	Vibrio sp. 09022	Vibrio sp. 09022 plasmid p09022A, complete sequence	NA	NA	NA	taxon:452804	NA	NA	NA	NA	genomic DNA	Vibrio sp. 09022	p09022A	9022	NA	NA	NA	NA	NA	NA	NA	NA	NA	NA	NA	NA	NA	NA	NA	NA	NA	NA	NA	NA	NA	NA	NA	NA	NA	NA
295	CP000818.1	circular	177642	Bacteria	Firmicutes	Bacilli	Bacillales	Bacillaceae	Lysinibacillus	Lysinibacillus sphaericus	Lysinibacillus sphaericus C3-41 plasmid pBsph, complete sequence	NA	NA	NA	taxon:444177	NA	NA	NA	NA	genomic DNA	Lysinibacillus sphaericus C3-41	pBsph	C3-41	NA	NA	NA	NA	NA	NA	NA	NA	NA	NA	NA	NA	NA	NA	NA	NA	NA	NA	NA	NA	NA	NA	NA	NA	NA	NA
296	CP000836.1	circular	103275	Bacteria	Proteobacteria	Gammaproteobacteria	Enterobacterales	Enterobacteriaceae	Escherichia	Escherichia coli	Escherichia coli chi7122 plasmid pAPEC-1, complete sequence	NA	NA	NA	taxon:475609	NA	NA	NA	NA	genomic DNA	Escherichia coli chi7122	pAPEC-1	chi7122	NA	NA	NA	NA	group: ExPEC; subgroup: APEC	NA	NA	O78:K80:H9	NA	NA	NA	NA	NA	NA	NA	NA	NA	NA	NA	NA	NA	NA	NA	NA	NA	NA
297	CP000876.1	circular	339639	Bacteria	Chloroflexi	Chloroflexia	Herpetosiphonales	Herpetosiphonaceae	Herpetosiphon	Herpetosiphon aurantiacus	Herpetosiphon aurantiacus DSM 785 plasmid pHAU01, complete sequence	NA	NA	NA	taxon:316274	NA	NA	NA	NA	genomic DNA	Herpetosiphon aurantiacus DSM 785	pHAU01	NA	NA	NA	NA	NA	NA	NA	ATCC:23779	NA	NA	NA	NA	NA	NA	NA	NA	NA	NA	NA	NA	NA	NA	NA	NA	NA	NA	NA
298	CP000877.1	circular	99204	Bacteria	Chloroflexi	Chloroflexia	Herpetosiphonales	Herpetosiphonaceae	Herpetosiphon	Herpetosiphon aurantiacus	Herpetosiphon aurantiacus DSM 785 plasmid pHAU02, complete sequence	NA	NA	NA	taxon:316274	NA	NA	NA	NA	genomic DNA	Herpetosiphon aurantiacus DSM 785	pHAU02	NA	NA	NA	NA	NA	NA	NA	ATCC:23779	NA	NA	NA	NA	NA	NA	NA	NA	NA	NA	NA	NA	NA	NA	NA	NA	NA	NA	NA
299	CP001028.1	circular	301592	Bacteria	Proteobacteria	Betaproteobacteria	Burkholderiales	Burkholderiaceae	Burkholderia	Burkholderia ambifaria	Burkholderia ambifaria MC40-6 plasmid pBMC401, complete sequence	NA	NA	NA	taxon:398577	NA	NA	NA	NA	genomic DNA	Burkholderia ambifaria MC40-6	pBMC401	MC40-6	NA	NA	NA	NA	NA	NA	NA	NA	NA	NA	NA	NA	NA	NA	NA	NA	NA	NA	NA	NA	NA	NA	NA	NA	NA	NA
300	CP001058.1	circular	2089	Bacteria	Proteobacteria	Gammaproteobacteria	Enterobacterales	Enterobacteriaceae	Shigella	Shigella boydii	Shigella boydii CDC 3083-94 plasmid pBS512_2, complete sequence	NA	NA	NA	taxon:344609	NA	NA	NA	NA	genomic DNA	Shigella boydii CDC 3083-94	pBS512_2	BS512; CDC 3083-94	NA	NA	NA	NA	NA	NA	NA	NA	NA	NA	NA	NA	NA	NA	NA	NA	NA	NA	NA	NA	NA	NA	NA	NA	NA	NA
301	CP001059.1	circular	33103	Bacteria	Proteobacteria	Gammaproteobacteria	Enterobacterales	Enterobacteriaceae	Shigella	Shigella boydii	Shigella boydii CDC 3083-94 plasmid pBS512_33, complete sequence	NA	NA	NA	taxon:344609	NA	NA	NA	NA	genomic DNA	Shigella boydii CDC 3083-94	pBS512_33	BS512; CDC 3083-94	NA	NA	NA	NA	NA	NA	NA	NA	NA	NA	NA	NA	NA	NA	NA	NA	NA	NA	NA	NA	NA	NA	NA	NA	NA	NA
302	CP001060.1	circular	5114	Bacteria	Proteobacteria	Gammaproteobacteria	Enterobacterales	Enterobacteriaceae	Shigella	Shigella boydii	Shigella boydii CDC 3083-94 plasmid pBS512_5, complete sequence	NA	NA	NA	taxon:344609	NA	NA	NA	NA	genomic DNA	Shigella boydii CDC 3083-94	pBS512_5	BS512; CDC 3083-94	NA	NA	NA	NA	NA	NA	NA	NA	NA	NA	NA	NA	NA	NA	NA	NA	NA	NA	NA	NA	NA	NA	NA	NA	NA	NA
303	CP001061.1	linear	7437	Bacteria	Proteobacteria	Gammaproteobacteria	Enterobacterales	Enterobacteriaceae	Shigella	Shigella boydii	Shigella boydii CDC 3083-94 plasmid pBS512_7, complete sequence	NA	NA	NA	taxon:344609	NA	NA	NA	NA	genomic DNA	Shigella boydii CDC 3083-94	pBS512_7	BS512; CDC 3083-94	NA	NA	NA	NA	NA	NA	NA	NA	NA	NA	NA	NA	NA	NA	NA	NA	NA	NA	NA	NA	NA	NA	NA	NA	NA	NA
304	CP001062.1	circular	210919	Bacteria	Proteobacteria	Gammaproteobacteria	Enterobacterales	Enterobacteriaceae	Shigella	Shigella boydii	Shigella boydii CDC 3083-94 plasmid pBS512_211, complete sequence	NA	NA	NA	taxon:344609	NA	NA	NA	NA	genomic DNA	Shigella boydii CDC 3083-94	pBS512_211	BS512; CDC 3083-94	NA	NA	NA	NA	NA	NA	NA	NA	NA	NA	NA	NA	NA	NA	NA	NA	NA	NA	NA	NA	NA	NA	NA	NA	NA	NA
305	CP001162.1	circular	138362	Bacteria	Proteobacteria	Gammaproteobacteria	Enterobacterales	Enterobacteriaceae	Escherichia	Escherichia coli	Escherichia coli Vir68 plasmid pVir68, complete sequence	NA	NA	USA	taxon:563770	NA	bovine	septicemia	NA	genomic DNA	Escherichia coli Vir68	pVir68	Vir68	NA	NA	NA	NA	NA	NA	NA	NA	NA	NA	NA	NA	NA	NA	NA	NA	NA	NA	NA	NA	NA	NA	NA	NA	NA	NA
306	CP001166.1	circular	258484	Bacteria	Firmicutes	Bacilli	Bacillales	Bacillaceae	Bacillus	Bacillus cereus	Bacillus cereus H3081.97 plasmid pH308197_258, complete sequence	NA	NA	NA	taxon:451708	NA	NA	NA	NA	genomic DNA	Bacillus cereus H3081.97	pH308197_258	H3081.97	NA	NA	NA	NA	NA	NA	NA	NA	NA	NA	NA	NA	NA	NA	NA	NA	NA	NA	NA	NA	NA	NA	NA	NA	NA	NA
307	CP001167.1	circular	11567	Bacteria	Firmicutes	Bacilli	Bacillales	Bacillaceae	Bacillus	Bacillus cereus	Bacillus cereus H3081.97 plasmid pH308197_11, complete sequence	NA	NA	NA	taxon:451708	NA	NA	NA	NA	genomic DNA	Bacillus cereus H3081.97	pH308197_11	H3081.97	NA	NA	NA	NA	NA	NA	NA	NA	NA	NA	NA	NA	NA	NA	NA	NA	NA	NA	NA	NA	NA	NA	NA	NA	NA	NA
308	CP001168.1	circular	10077	Bacteria	Firmicutes	Bacilli	Bacillales	Bacillaceae	Bacillus	Bacillus cereus	Bacillus cereus H3081.97 plasmid pH308197_10, complete sequence	NA	NA	NA	taxon:451708	NA	NA	NA	NA	genomic DNA	Bacillus cereus H3081.97	pH308197_10	H3081.97	NA	NA	NA	NA	NA	NA	NA	NA	NA	NA	NA	NA	NA	NA	NA	NA	NA	NA	NA	NA	NA	NA	NA	NA	NA	NA
309	CP001169.1	circular	29189	Bacteria	Firmicutes	Bacilli	Bacillales	Bacillaceae	Bacillus	Bacillus cereus	Bacillus cereus H3081.97 plasmid pH308197_29, complete sequence	NA	NA	NA	taxon:451708	NA	NA	NA	NA	genomic DNA	Bacillus cereus H3081.97	pH308197_29	H3081.97	NA	NA	NA	NA	NA	NA	NA	NA	NA	NA	NA	NA	NA	NA	NA	NA	NA	NA	NA	NA	NA	NA	NA	NA	NA	NA
310	CP001170.1	circular	72792	Bacteria	Firmicutes	Bacilli	Bacillales	Bacillaceae	Bacillus	Bacillus cereus	Bacillus cereus H3081.97 plasmid pH308197_73, complete sequence	NA	NA	NA	taxon:451708	NA	NA	NA	NA	genomic DNA	Bacillus cereus H3081.97	pH308197_73	H3081.97	NA	NA	NA	NA	NA	NA	NA	NA	NA	NA	NA	NA	NA	NA	NA	NA	NA	NA	NA	NA	NA	NA	NA	NA	NA	NA
311	CP001171.1	circular	3424	Bacteria	Firmicutes	Bacilli	Bacillales	Bacillaceae	Bacillus	Bacillus cereus	Bacillus cereus H3081.97 plasmid pH308197_3, complete sequence	NA	NA	NA	taxon:451708	NA	NA	NA	NA	genomic DNA	Bacillus cereus H3081.97	pH308197_3	H3081.97	NA	NA	NA	NA	NA	NA	NA	NA	NA	NA	NA	NA	NA	NA	NA	NA	NA	NA	NA	NA	NA	NA	NA	NA	NA	NA
312	CP001384.1	circular	223364	Bacteria	Proteobacteria	Gammaproteobacteria	Enterobacterales	Enterobacteriaceae	Shigella	Shigella flexneri	Shigella flexneri 2002017 plasmid pSFxv_1, complete sequence	NA	NA	NA	taxon:591020	NA	NA	NA	NA	genomic DNA	Shigella flexneri 2002017	pSFxv_1	2002017	NA	NA	NA	NA	NA	NA	NA	Fxv	NA	NA	NA	NA	NA	NA	NA	NA	NA	NA	NA	NA	NA	NA	NA	NA	NA	NA
313	CP001385.1	circular	6850	Bacteria	Proteobacteria	Gammaproteobacteria	Enterobacterales	Enterobacteriaceae	Shigella	Shigella flexneri	Shigella flexneri 2002017 plasmid pSFxv_2, complete sequence	NA	NA	NA	taxon:591020	NA	NA	NA	NA	genomic DNA	Shigella flexneri 2002017	pSFxv_2	2002017	NA	NA	NA	NA	NA	NA	NA	Fxv	NA	NA	NA	NA	NA	NA	NA	NA	NA	NA	NA	NA	NA	NA	NA	NA	NA	NA
314	CP001386.1	circular	6200	Bacteria	Proteobacteria	Gammaproteobacteria	Enterobacterales	Enterobacteriaceae	Shigella	Shigella flexneri	Shigella flexneri 2002017 plasmid pSFxv_3, complete sequence	NA	NA	NA	taxon:591020	NA	NA	NA	NA	genomic DNA	Shigella flexneri 2002017	pSFxv_3	2002017	NA	NA	NA	NA	NA	NA	NA	Fxv	NA	NA	NA	NA	NA	NA	NA	NA	NA	NA	NA	NA	NA	NA	NA	NA	NA	NA
315	CP001387.1	circular	4042	Bacteria	Proteobacteria	Gammaproteobacteria	Enterobacterales	Enterobacteriaceae	Shigella	Shigella flexneri	Shigella flexneri 2002017 plasmid pSFxv_4, complete sequence	NA	NA	NA	taxon:591020	NA	NA	NA	NA	genomic DNA	Shigella flexneri 2002017	pSFxv_4	2002017	NA	NA	NA	NA	NA	NA	NA	Fxv	NA	NA	NA	NA	NA	NA	NA	NA	NA	NA	NA	NA	NA	NA	NA	NA	NA	NA
316	CP001388.1	circular	3180	Bacteria	Proteobacteria	Gammaproteobacteria	Enterobacterales	Enterobacteriaceae	Shigella	Shigella flexneri	Shigella flexneri 2002017 plasmid pSFxv_5, complete sequence	NA	NA	NA	taxon:591020	NA	NA	NA	NA	genomic DNA	Shigella flexneri 2002017	pSFxv_5	2002017	NA	NA	NA	NA	NA	NA	NA	Fxv	NA	NA	NA	NA	NA	NA	NA	NA	NA	NA	NA	NA	NA	NA	NA	NA	NA	NA
317	CP001516.1	linear	52543	Bacteria	Spirochaetes	Spirochaetia	Spirochaetales	Borreliaceae	Borreliella	Borreliella finlandensis	Borreliella finlandensis strain SV1 plasmid SV1_lp32-12, complete sequence	NA	NA	NA	taxon:498741	NA	NA	NA	NA	genomic DNA	Borreliella finlandensis	SV1_lp32-12	SV1	NA	NA	NA	NA	NA	NA	NA	NA	reference material of Borreliella finlandensis	NA	NA	NA	NA	NA	NA	NA	NA	NA	NA	NA	NA	NA	NA	NA	NA	NA
318	CP001517.1	circular	30053	Bacteria	Spirochaetes	Spirochaetia	Spirochaetales	Borreliaceae	Borreliella	Borreliella finlandensis	Borreliella finlandensis strain SV1 plasmid SV1_cp32-3, complete sequence	NA	NA	NA	taxon:498741	NA	NA	NA	NA	genomic DNA	Borreliella finlandensis	SV1_cp32-3	SV1	NA	NA	NA	NA	NA	NA	NA	NA	reference material of Borreliella finlandensis	NA	NA	NA	NA	NA	NA	NA	NA	NA	NA	NA	NA	NA	NA	NA	NA	NA
319	CP001518.1	linear	21708	Bacteria	Spirochaetes	Spirochaetia	Spirochaetales	Borreliaceae	Borreliella	Borreliella finlandensis	Borreliella finlandensis strain SV1 plasmid SV1_lp28-2, complete sequence	NA	NA	NA	taxon:498741	NA	NA	NA	NA	genomic DNA	Borreliella finlandensis	SV1_lp28-2	SV1	NA	NA	NA	NA	NA	NA	NA	NA	reference material of Borreliella finlandensis	NA	NA	NA	NA	NA	NA	NA	NA	NA	NA	NA	NA	NA	NA	NA	NA	NA
320	CP001522.1	circular	26496	Bacteria	Spirochaetes	Spirochaetia	Spirochaetales	Borreliaceae	Borreliella	Borreliella finlandensis	Borreliella finlandensis strain SV1 plasmid SV1_cp26, complete sequence	NA	NA	NA	taxon:498741	NA	NA	NA	NA	genomic DNA	Borreliella finlandensis	SV1_cp26	SV1	NA	NA	NA	NA	NA	NA	NA	NA	reference material of Borreliella finlandensis	NA	NA	NA	NA	NA	NA	NA	NA	NA	NA	NA	NA	NA	NA	NA	NA	NA
321	CP001524.1	linear	83377	Bacteria	Spirochaetes	Spirochaetia	Spirochaetales	Borreliaceae	Borreliella	Borreliella finlandensis	Borreliella finlandensis strain SV1 plasmid SV1_lp54, complete sequence	NA	NA	NA	taxon:498741	NA	NA	NA	NA	genomic DNA	Borreliella finlandensis	SV1_lp54	SV1	NA	NA	NA	NA	NA	NA	NA	NA	reference material of Borreliella finlandensis	NA	NA	NA	NA	NA	NA	NA	NA	NA	NA	NA	NA	NA	NA	NA	NA	NA
322	CP001653.1	linear	48220	Bacteria	Spirochaetes	Spirochaetia	Spirochaetales	Borreliaceae	Borreliella	Borreliella burgdorferi	Borrelia burgdorferi 297 plasmid 297_lp54, complete sequence	NA	NA	NA	taxon:521009	NA	NA	NA	NA	genomic DNA	Borrelia burgdorferi 297	297_lp54	297	NA	NA	NA	NA	NA	NA	NA	NA	NA	NA	NA	NA	NA	NA	NA	NA	NA	NA	NA	NA	NA	NA	NA	NA	NA	NA
323	CP001659.1	circular	107690	Bacteria	Firmicutes	Clostridia	Clostridiales	Clostridiaceae	Clostridium	Clostridium botulinum	Clostridium botulinum D str. 1873 plasmid pCLG1, complete sequence	NA	1958	Chad	taxon:592027	NA	NA	ham	NA	genomic DNA	Clostridium botulinum D str. 1873	pCLG1	1873	NA	NA	NA	NA	type: D	NA	NA	NA	NA	NA	NA	NA	NA	NA	NA	NA	NA	NA	NA	NA	NA	NA	NA	NA	NA	NA
324	CP001660.1	circular	54152	Bacteria	Firmicutes	Clostridia	Clostridiales	Clostridiaceae	Clostridium	Clostridium botulinum	Clostridium botulinum D str. 1873 plasmid pCLG2, complete sequence	NA	1958	Chad	taxon:592027	NA	NA	ham	NA	genomic DNA	Clostridium botulinum D str. 1873	pCLG2	1873	NA	NA	NA	NA	type: D	NA	NA	NA	NA	NA	NA	NA	NA	NA	NA	NA	NA	NA	NA	NA	NA	NA	NA	NA	NA	NA
325	CP001770.1	circular	189452	Bacteria	Bacteroidetes	Cytophagia	Cytophagales	Cytophagaceae	Spirosoma	Spirosoma linguale	Spirosoma linguale DSM 74 plasmid pSLIN01, complete sequence	NA	NA	NA	taxon:504472	NA	NA	NA	NA	genomic DNA	Spirosoma linguale DSM 74	pSLIN01	DSM 74	NA	NA	NA	NA	NA	NA	NA	NA	NA	NA	NA	NA	NA	NA	NA	NA	NA	NA	NA	NA	NA	NA	NA	NA	NA	NA
326	CP001771.1	circular	146936	Bacteria	Bacteroidetes	Cytophagia	Cytophagales	Cytophagaceae	Spirosoma	Spirosoma linguale	Spirosoma linguale DSM 74 plasmid pSLIN02, complete sequence	NA	NA	NA	taxon:504472	NA	NA	NA	NA	genomic DNA	Spirosoma linguale DSM 74	pSLIN02	DSM 74	NA	NA	NA	NA	NA	NA	NA	NA	NA	NA	NA	NA	NA	NA	NA	NA	NA	NA	NA	NA	NA	NA	NA	NA	NA	NA
327	CP001772.1	circular	36434	Bacteria	Bacteroidetes	Cytophagia	Cytophagales	Cytophagaceae	Spirosoma	Spirosoma linguale	Spirosoma linguale DSM 74 plasmid pSLIN03, complete sequence	NA	NA	NA	taxon:504472	NA	NA	NA	NA	genomic DNA	Spirosoma linguale DSM 74	pSLIN03	DSM 74	NA	NA	NA	NA	NA	NA	NA	NA	NA	NA	NA	NA	NA	NA	NA	NA	NA	NA	NA	NA	NA	NA	NA	NA	NA	NA
328	CP001773.1	circular	9965	Bacteria	Bacteroidetes	Cytophagia	Cytophagales	Cytophagaceae	Spirosoma	Spirosoma linguale	Spirosoma linguale DSM 74 plasmid pSLIN04, complete sequence	NA	NA	NA	taxon:504472	NA	NA	NA	NA	genomic DNA	Spirosoma linguale DSM 74	pSLIN04	DSM 74	NA	NA	NA	NA	NA	NA	NA	NA	NA	NA	NA	NA	NA	NA	NA	NA	NA	NA	NA	NA	NA	NA	NA	NA	NA	NA
329	CP001774.1	circular	8651	Bacteria	Bacteroidetes	Cytophagia	Cytophagales	Cytophagaceae	Spirosoma	Spirosoma linguale	Spirosoma linguale DSM 74 plasmid pSLIN05, complete sequence	NA	NA	NA	taxon:504472	NA	NA	NA	NA	genomic DNA	Spirosoma linguale DSM 74	pSLIN05	DSM 74	NA	NA	NA	NA	NA	NA	NA	NA	NA	NA	NA	NA	NA	NA	NA	NA	NA	NA	NA	NA	NA	NA	NA	NA	NA	NA
330	CP001775.1	circular	7683	Bacteria	Bacteroidetes	Cytophagia	Cytophagales	Cytophagaceae	Spirosoma	Spirosoma linguale	Spirosoma linguale DSM 74 plasmid pSLIN06, complete sequence	NA	NA	NA	taxon:504472	NA	NA	NA	NA	genomic DNA	Spirosoma linguale DSM 74	pSLIN06	DSM 74	NA	NA	NA	NA	NA	NA	NA	NA	NA	NA	NA	NA	NA	NA	NA	NA	NA	NA	NA	NA	NA	NA	NA	NA	NA	NA
331	CP001776.1	circular	7308	Bacteria	Bacteroidetes	Cytophagia	Cytophagales	Cytophagaceae	Spirosoma	Spirosoma linguale	Spirosoma linguale DSM 74 plasmid pSLIN07, complete sequence	NA	NA	NA	taxon:504472	NA	NA	NA	NA	genomic DNA	Spirosoma linguale DSM 74	pSLIN07	DSM 74	NA	NA	NA	NA	NA	NA	NA	NA	NA	NA	NA	NA	NA	NA	NA	NA	NA	NA	NA	NA	NA	NA	NA	NA	NA	NA
332	CP001777.1	circular	6072	Bacteria	Bacteroidetes	Cytophagia	Cytophagales	Cytophagaceae	Spirosoma	Spirosoma linguale	Spirosoma linguale DSM 74 plasmid pSLIN08, complete sequence	NA	NA	NA	taxon:504472	NA	NA	NA	NA	genomic DNA	Spirosoma linguale DSM 74	pSLIN08	DSM 74	NA	NA	NA	NA	NA	NA	NA	NA	NA	NA	NA	NA	NA	NA	NA	NA	NA	NA	NA	NA	NA	NA	NA	NA	NA	NA
333	CP001881.1	circular	37066	Bacteria	Proteobacteria	Alphaproteobacteria	Sphingomonadales	Sphingomonadaceae	Zymomonas	Zymomonas mobilis	Zymomonas mobilis subsp. mobilis ZM4 plasmid pZZM401, complete sequence	NA	NA	NA	taxon:264203	NA	NA	NA	NA	genomic DNA	Zymomonas mobilis subsp. mobilis ZM4 = ATCC 31821	pZZM401	ZM4	NA	mobilis	NA	NA	NA	NA	NA	NA	NA	NA	NA	NA	NA	NA	NA	NA	NA	NA	NA	NA	NA	NA	NA	NA	NA	NA
334	CP001882.1	circular	33915	Bacteria	Proteobacteria	Alphaproteobacteria	Sphingomonadales	Sphingomonadaceae	Zymomonas	Zymomonas mobilis	Zymomonas mobilis subsp. mobilis ZM4 plasmid pZZM402, complete sequence	NA	NA	NA	taxon:264203	NA	NA	NA	NA	genomic DNA	Zymomonas mobilis subsp. mobilis ZM4 = ATCC 31821	pZZM402	ZM4	NA	mobilis	NA	NA	NA	NA	NA	NA	NA	NA	NA	NA	NA	NA	NA	NA	NA	NA	NA	NA	NA	NA	NA	NA	NA	NA
335	CP001884.1	circular	32400	Bacteria	Proteobacteria	Alphaproteobacteria	Sphingomonadales	Sphingomonadaceae	Zymomonas	Zymomonas mobilis	Zymomonas mobilis subsp. mobilis ZM4 plasmid pZZM404, complete sequence	NA	NA	NA	taxon:264203	NA	NA	NA	NA	genomic DNA	Zymomonas mobilis subsp. mobilis ZM4 = ATCC 31821	pZZM404	ZM4	NA	mobilis	NA	NA	NA	NA	NA	NA	NA	NA	NA	NA	NA	NA	NA	NA	NA	NA	NA	NA	NA	NA	NA	NA	NA	NA
336	CP001885.1	circular	30952	Bacteria	Proteobacteria	Alphaproteobacteria	Sphingomonadales	Sphingomonadaceae	Zymomonas	Zymomonas mobilis	Zymomonas mobilis subsp. mobilis ZM4 plasmid pZZM405, complete sequence	NA	NA	NA	taxon:264203	NA	NA	NA	NA	genomic DNA	Zymomonas mobilis subsp. mobilis ZM4 = ATCC 31821	pZZM405	ZM4	NA	mobilis	NA	NA	NA	NA	NA	NA	NA	NA	NA	NA	NA	NA	NA	NA	NA	NA	NA	NA	NA	NA	NA	NA	NA	NA
337	CP002030.1	circular	44084	Bacteria	Proteobacteria	Epsilonproteobacteria	Campylobacterales	Campylobacteraceae	Campylobacter	Campylobacter jejuni	Campylobacter jejuni subsp. jejuni ICDCCJ07001 plasmid pTet, complete sequence	NA	NA	NA	taxon:757425	NA	NA	NA	NA	genomic DNA	Campylobacter jejuni subsp. jejuni ICDCCJ07001	pTet	ICDCCJ07001	NA	jejuni	NA	NA	NA	NA	NA	NA	NA	NA	NA	NA	NA	NA	NA	NA	NA	NA	NA	NA	NA	NA	NA	NA	NA	NA
338	CP002035.1	circular	44581	Bacteria	Firmicutes	Bacilli	Lactobacillales	Lactobacillaceae	Lactobacillus	Lactobacillus salivarius	Lactobacillus salivarius CECT 5713 plasmid pHN1, complete sequence	NA	NA	NA	taxon:712961	NA	NA	NA	NA	genomic DNA	Lactobacillus salivarius CECT 5713	pHN1	CECT 5713	NA	NA	NA	NA	NA	NA	NA	NA	NA	NA	NA	NA	NA	NA	NA	NA	NA	NA	NA	NA	NA	NA	NA	NA	NA	NA
339	CP002036.1	circular	20426	Bacteria	Firmicutes	Bacilli	Lactobacillales	Lactobacillaceae	Lactobacillus	Lactobacillus salivarius	Lactobacillus salivarius CECT 5713 plasmid pHN2, complete sequence	NA	NA	NA	taxon:712961	NA	NA	NA	NA	genomic DNA	Lactobacillus salivarius CECT 5713	pHN2	CECT 5713	NA	NA	NA	NA	NA	NA	NA	NA	NA	NA	NA	NA	NA	NA	NA	NA	NA	NA	NA	NA	NA	NA	NA	NA	NA	NA
340	CP002037.1	circular	242962	Bacteria	Firmicutes	Bacilli	Lactobacillales	Lactobacillaceae	Lactobacillus	Lactobacillus salivarius	Lactobacillus salivarius CECT 5713 plasmid pHN3, complete sequence	NA	NA	NA	taxon:712961	NA	NA	NA	NA	genomic DNA	Lactobacillus salivarius CECT 5713	pHN3	CECT 5713	NA	NA	NA	NA	NA	NA	NA	NA	NA	NA	NA	NA	NA	NA	NA	NA	NA	NA	NA	NA	NA	NA	NA	NA	NA	NA
341	CP002089.1	circular	146002	Bacteria	Proteobacteria	Gammaproteobacteria	Enterobacterales	Enterobacteriaceae	Salmonella	Salmonella enterica	Salmonella enterica subsp. enterica serovar Kentucky plasmid pSSAP03302A, complete sequence	NA	NA	NA	taxon:192955	NA	chicken	NA	NA	genomic DNA	Salmonella enterica subsp. enterica serovar Kentucky	pSSAP03302A	SSAP03002A	Kentucky	enterica	NA	NA	NA	NA	NA	NA	NA	NA	NA	NA	NA	NA	NA	NA	NA	NA	NA	NA	NA	NA	NA	NA	NA	NA
342	CP002090.1	circular	146811	Bacteria	Proteobacteria	Gammaproteobacteria	Enterobacterales	Enterobacteriaceae	Salmonella	Salmonella enterica	Salmonella enterica subsp. enterica serovar Kentucky plasmid pCS0010A, complete sequence	NA	NA	NA	taxon:192955	NA	chicken	cloaca	NA	genomic DNA	Salmonella enterica subsp. enterica serovar Kentucky	pCS0010A	CS0010A	Kentucky	enterica	NA	NA	NA	NA	NA	NA	NA	NA	NA	NA	NA	NA	NA	NA	NA	NA	NA	NA	NA	NA	NA	NA	NA	NA
343	CP002119.1	circular	191996	Bacteria	Firmicutes	Clostridia	Clostridiales	Clostridiaceae	Clostridium	Clostridium acetobutylicum	Clostridium acetobutylicum EA 2018 plasmid pEA2018, complete sequence	NA	NA	China	taxon:863638	NA	NA	NA	NA	genomic DNA	Clostridium acetobutylicum EA 2018	pEA2018	EA 2018	NA	NA	NA	NA	NA	NA	CCTCC:M94061	NA	NA	NA	NA	NA	NA	NA	NA	NA	NA	NA	NA	NA	NA	NA	NA	NA	NA	NA
344	CP002135.1	circular	26972	Bacteria	Firmicutes	Bacilli	Bacillales	Staphylococcaceae	Staphylococcus	Staphylococcus aureus	Staphylococcus aureus strain 18807 plasmid p18807-P03, complete sequence	NA	NA	NA	taxon:1280	NA	NA	NA	NA	genomic DNA	Staphylococcus aureus	p18807-P03	18807	NA	NA	NA	NA	NA	NA	NA	NA	NA	NA	NA	NA	NA	NA	NA	NA	NA	NA	NA	NA	NA	NA	NA	NA	NA	NA
345	CP002143.1	circular	27070	Bacteria	Firmicutes	Bacilli	Bacillales	Staphylococcaceae	Staphylococcus	Staphylococcus aureus	Staphylococcus aureus strain 18811 plasmid p18811-P03, complete sequence	NA	NA	NA	taxon:1280	NA	NA	NA	NA	genomic DNA	Staphylococcus aureus	p18811-P03	18811	NA	NA	NA	NA	NA	NA	NA	NA	NA	NA	NA	NA	NA	NA	NA	NA	NA	NA	NA	NA	NA	NA	NA	NA	NA	NA
346	CP002145.1	circular	30127	Bacteria	Firmicutes	Bacilli	Bacillales	Staphylococcaceae	Staphylococcus	Staphylococcus aureus	Staphylococcus aureus strain 18813 plasmid p18813-P03, complete sequence	NA	NA	NA	taxon:1280	NA	NA	NA	NA	genomic DNA	Staphylococcus aureus	p18813-P03	18813	NA	NA	NA	NA	NA	NA	NA	NA	NA	NA	NA	NA	NA	NA	NA	NA	NA	NA	NA	NA	NA	NA	NA	NA	NA	NA
347	CP002148.1	circular	2473	Bacteria	Firmicutes	Bacilli	Bacillales	Staphylococcaceae	Staphylococcus	Staphylococcus aureus	Staphylococcus aureus strain 19321 plasmid p19321-P01, complete sequence	NA	NA	NA	taxon:1280	NA	NA	NA	NA	genomic DNA	Staphylococcus aureus	p19321-P01	19321	NA	NA	NA	NA	NA	NA	NA	NA	NA	NA	NA	NA	NA	NA	NA	NA	NA	NA	NA	NA	NA	NA	NA	NA	NA	NA
348	CP002149.1	circular	27068	Bacteria	Firmicutes	Bacilli	Bacillales	Staphylococcaceae	Staphylococcus	Staphylococcus aureus	Staphylococcus aureus strain LAC plasmid pLAC-P03, complete sequence	NA	NA	NA	taxon:1280	NA	NA	NA	NA	genomic DNA	Staphylococcus aureus	pLAC-P03	LAC	NA	NA	NA	NA	NA	NA	NA	NA	NA	NA	NA	NA	NA	NA	NA	NA	NA	NA	NA	NA	NA	NA	NA	NA	NA	NA
349	CP002151.1	circular	64696	Bacteria	NA	NA	NA	NA	NA	uncultured bacterium	Uncultured bacterium plasmid PB5, complete sequence	NA	NA	NA	taxon:77133	NA	NA	activated sludge	NA	genomic DNA	uncultured bacterium	PB5	NA	NA	NA	NA	NA	NA	NA	NA	NA	NA	NA	NA	NA	NA	NA		NA	NA	NA	NA	NA	NA	NA	NA	NA	NA	NA
350	CP002152.1	circular	66911	Bacteria	NA	NA	NA	NA	NA	uncultured bacterium	Uncultured bacterium plasmid PB11, complete sequence	NA	NA	NA	taxon:77133	NA	NA	activated sludge	NA	genomic DNA	uncultured bacterium	PB11	NA	NA	NA	NA	NA	NA	NA	NA	NA	NA	NA	NA	NA	NA	NA		NA	NA	NA	NA	NA	NA	NA	NA	NA	NA	NA
351	CP002153.1	circular	72683	Bacteria	NA	NA	NA	NA	NA	uncultured bacterium	Uncultured bacterium plasmid PSP21, complete sequence	NA	NA	NA	taxon:77133	NA	NA	activated sludge	NA	genomic DNA	uncultured bacterium	PSP21	NA	NA	NA	NA	NA	NA	NA	NA	NA	NA	NA	NA	NA	NA	NA		NA	NA	NA	NA	NA	NA	NA	NA	NA	NA	NA
352	CP002178.1	circular	77627	Bacteria	Firmicutes	Bacilli	Bacillales	Bacillaceae	Bacillus	Bacillus thuringiensis	Bacillus thuringiensis serovar tenebrionis str. YBT-1765 plasmid pBMB165, complete sequence	NA	NA	NA	taxon:529121	NA	NA	NA	NA	genomic DNA	Bacillus thuringiensis serovar tenebrionis str. YBT-1765	pBMB165	YBT-1765	tenebrionis	NA	NA	NA	NA	NA	NA	NA	NA	NA	NA	NA	NA	NA	NA	NA	NA	NA	NA	NA	NA	NA	NA	NA	NA	NA
353	CP002179.1	circular	35044	Bacteria	Proteobacteria	Gammaproteobacteria	Enterobacterales	Yersiniaceae	Yersinia	Yersinia pestis	Yersinia pestis Java 9 plasmid pJARS35, complete sequence	NA	NA	NA	taxon:880632	NA	NA	NA	NA	genomic DNA	Yersinia pestis Java 9	pJARS35	Java 9	NA	NA	NA	NA	NA	NA	NA	NA	NA	NA	NA	NA	NA	NA	NA	NA	NA	NA	NA	NA	NA	NA	NA	NA	NA	NA
354	CP002180.1	circular	16030	Bacteria	Proteobacteria	Gammaproteobacteria	Enterobacterales	Yersiniaceae	Yersinia	Yersinia pestis	Yersinia pestis Java 9 plasmid pPCP, complete sequence	NA	NA	NA	taxon:880632	NA	NA	NA	NA	genomic DNA	Yersinia pestis Java 9	pPCP	Java 9	NA	NA	NA	NA	NA	NA	NA	NA	NA	NA	NA	NA	NA	NA	NA	NA	NA	NA	NA	NA	NA	NA	NA	NA	NA	NA
355	CP002181.1	circular	36085	Bacteria	Proteobacteria	Gammaproteobacteria	Enterobacterales	Yersiniaceae	Yersinia	Yersinia pestis	Yersinia pestis Java 9 plasmid pJARS36, complete sequence	NA	NA	NA	taxon:880632	NA	NA	NA	NA	genomic DNA	Yersinia pestis Java 9	pJARS36	Java 9	NA	NA	NA	NA	NA	NA	NA	NA	NA	NA	NA	NA	NA	NA	NA	NA	NA	NA	NA	NA	NA	NA	NA	NA	NA	NA
356	CP002182.1	circular	77072	Bacteria	Proteobacteria	Gammaproteobacteria	Enterobacterales	Yersiniaceae	Yersinia	Yersinia pestis	Yersinia pestis Java 9 plasmid pCD, complete sequence	NA	NA	NA	taxon:880632	NA	NA	NA	NA	genomic DNA	Yersinia pestis Java 9	pCD	Java 9	NA	NA	NA	NA	NA	NA	NA	NA	NA	NA	NA	NA	NA	NA	NA	NA	NA	NA	NA	NA	NA	NA	NA	NA	NA	NA
357	CP002208.2	circular	32388	Bacteria	Firmicutes	Bacilli	Lactobacillales	Enterococcaceae	Enterococcus	Enterococcus faecalis	Enterococcus faecalis strain EF-01 plasmid pEF-01, complete sequence	NA	NA	China	taxon:1351	NA	NA	bovine	NA	genomic DNA	Enterococcus faecalis	pEF-01	EF-01	NA	NA	NA	NA	NA	NA	NA	NA	NA	NA	NA	NA	NA	NA	NA	NA	NA	NA	NA	NA	NA	NA	NA	NA	NA	NA
358	CP002253.1	linear	25211	Bacteria	Spirochaetes	Spirochaetia	Spirochaetales	Borreliaceae	Borreliella	Borreliella burgdorferi	Borrelia burgdorferi 297 plasmid 297_lp28-3, complete sequence	NA	NA	NA	taxon:521009	NA	NA	NA	NA	genomic DNA	Borrelia burgdorferi 297	297_lp28-3	297	NA	NA	NA	NA	NA	NA	NA	NA	NA	NA	NA	NA	NA	NA	NA	NA	NA	NA	NA	NA	NA	NA	NA	NA	NA	NA
359	CP002254.1	circular	30902	Bacteria	Spirochaetes	Spirochaetia	Spirochaetales	Borreliaceae	Borreliella	Borreliella burgdorferi	Borrelia burgdorferi 297 plasmid 297_cp32-1, complete sequence	NA	NA	NA	taxon:521009	NA	NA	NA	NA	genomic DNA	Borrelia burgdorferi 297	297_cp32-1	297	NA	NA	NA	NA	NA	NA	NA	NA	NA	NA	NA	NA	NA	NA	NA	NA	NA	NA	NA	NA	NA	NA	NA	NA	NA	NA
360	CP002255.1	circular	30795	Bacteria	Spirochaetes	Spirochaetia	Spirochaetales	Borreliaceae	Borreliella	Borreliella burgdorferi	Borrelia burgdorferi 297 plasmid 297_cp32-12, complete sequence	NA	NA	NA	taxon:521009	NA	NA	NA	NA	genomic DNA	Borrelia burgdorferi 297	297_cp32-12	297	NA	NA	NA	NA	NA	NA	NA	NA	NA	NA	NA	NA	NA	NA	NA	NA	NA	NA	NA	NA	NA	NA	NA	NA	NA	NA
361	CP002256.1	linear	22715	Bacteria	Spirochaetes	Spirochaetia	Spirochaetales	Borreliaceae	Borreliella	Borreliella burgdorferi	Borrelia burgdorferi 297 plasmid 297_lp36, complete sequence	NA	NA	NA	taxon:521009	NA	NA	NA	NA	genomic DNA	Borrelia burgdorferi 297	297_lp36	297	NA	NA	NA	NA	NA	NA	NA	NA	NA	NA	NA	NA	NA	NA	NA	NA	NA	NA	NA	NA	NA	NA	NA	NA	NA	NA
362	CP002257.1	circular	21165	Bacteria	Spirochaetes	Spirochaetia	Spirochaetales	Borreliaceae	Borreliella	Borreliella burgdorferi	Borrelia burgdorferi 297 plasmid 297_cp32-7, complete sequence	NA	NA	NA	taxon:521009	NA	NA	NA	NA	genomic DNA	Borrelia burgdorferi 297	297_cp32-7	297	NA	NA	NA	NA	NA	NA	NA	NA	NA	NA	NA	NA	NA	NA	NA	NA	NA	NA	NA	NA	NA	NA	NA	NA	NA	NA
363	CP002258.1	linear	27035	Bacteria	Spirochaetes	Spirochaetia	Spirochaetales	Borreliaceae	Borreliella	Borreliella burgdorferi	Borrelia burgdorferi 297 plasmid 297_lp38, complete sequence	NA	NA	NA	taxon:521009	NA	NA	NA	NA	genomic DNA	Borrelia burgdorferi 297	297_lp38	297	NA	NA	NA	NA	NA	NA	NA	NA	NA	NA	NA	NA	NA	NA	NA	NA	NA	NA	NA	NA	NA	NA	NA	NA	NA	NA
364	CP002259.1	linear	22135	Bacteria	Spirochaetes	Spirochaetia	Spirochaetales	Borreliaceae	Borreliella	Borreliella burgdorferi	Borrelia burgdorferi 297 plasmid 297_lp28-6, complete sequence	NA	NA	NA	taxon:521009	NA	NA	NA	NA	genomic DNA	Borrelia burgdorferi 297	297_lp28-6	297	NA	NA	NA	NA	NA	NA	NA	NA	NA	NA	NA	NA	NA	NA	NA	NA	NA	NA	NA	NA	NA	NA	NA	NA	NA	NA
365	CP002260.1	circular	30286	Bacteria	Spirochaetes	Spirochaetia	Spirochaetales	Borreliaceae	Borreliella	Borreliella burgdorferi	Borrelia burgdorferi 297 plasmid 297_cp32-11, complete sequence	NA	NA	NA	taxon:521009	NA	NA	NA	NA	genomic DNA	Borrelia burgdorferi 297	297_cp32-11	297	NA	NA	NA	NA	NA	NA	NA	NA	NA	NA	NA	NA	NA	NA	NA	NA	NA	NA	NA	NA	NA	NA	NA	NA	NA	NA
366	CP002261.1	circular	30636	Bacteria	Spirochaetes	Spirochaetia	Spirochaetales	Borreliaceae	Borreliella	Borreliella burgdorferi	Borrelia burgdorferi 297 plasmid 297_cp32-5, complete sequence	NA	NA	NA	taxon:521009	NA	NA	NA	NA	genomic DNA	Borrelia burgdorferi 297	297_cp32-5	297	NA	NA	NA	NA	NA	NA	NA	NA	NA	NA	NA	NA	NA	NA	NA	NA	NA	NA	NA	NA	NA	NA	NA	NA	NA	NA
367	CP002262.1	circular	21172	Bacteria	Spirochaetes	Spirochaetia	Spirochaetales	Borreliaceae	Borreliella	Borreliella burgdorferi	Borrelia burgdorferi 297 plasmid 297_cp32-9, complete sequence	NA	NA	NA	taxon:521009	NA	NA	NA	NA	genomic DNA	Borrelia burgdorferi 297	297_cp32-9	297	NA	NA	NA	NA	NA	NA	NA	NA	NA	NA	NA	NA	NA	NA	NA	NA	NA	NA	NA	NA	NA	NA	NA	NA	NA	NA
368	CP002263.1	circular	30641	Bacteria	Spirochaetes	Spirochaetia	Spirochaetales	Borreliaceae	Borreliella	Borreliella burgdorferi	Borrelia burgdorferi 297 plasmid 297_cp32-6, complete sequence	NA	NA	NA	taxon:521009	NA	NA	NA	NA	genomic DNA	Borrelia burgdorferi 297	297_cp32-6	297	NA	NA	NA	NA	NA	NA	NA	NA	NA	NA	NA	NA	NA	NA	NA	NA	NA	NA	NA	NA	NA	NA	NA	NA	NA	NA
369	CP002264.1	linear	12965	Bacteria	Spirochaetes	Spirochaetia	Spirochaetales	Borreliaceae	Borreliella	Borreliella burgdorferi	Borrelia burgdorferi 297 plasmid 297_lp17, complete sequence	NA	NA	NA	taxon:521009	NA	NA	NA	NA	genomic DNA	Borrelia burgdorferi 297	297_lp17	297	NA	NA	NA	NA	NA	NA	NA	NA	NA	NA	NA	NA	NA	NA	NA	NA	NA	NA	NA	NA	NA	NA	NA	NA	NA	NA
370	CP002265.1	linear	20978	Bacteria	Spirochaetes	Spirochaetia	Spirochaetales	Borreliaceae	Borreliella	Borreliella burgdorferi	Borrelia burgdorferi 297 plasmid 297_lp28-1, complete sequence	NA	NA	NA	taxon:521009	NA	NA	NA	NA	genomic DNA	Borrelia burgdorferi 297	297_lp28-1	297	NA	NA	NA	NA	NA	NA	NA	NA	NA	NA	NA	NA	NA	NA	NA	NA	NA	NA	NA	NA	NA	NA	NA	NA	NA	NA
371	CP002266.1	linear	25788	Bacteria	Spirochaetes	Spirochaetia	Spirochaetales	Borreliaceae	Borreliella	Borreliella burgdorferi	Borrelia burgdorferi 297 plasmid 297_lp28-4, complete sequence	NA	NA	NA	taxon:521009	NA	NA	NA	NA	genomic DNA	Borrelia burgdorferi 297	297_lp28-4	297	NA	NA	NA	NA	NA	NA	NA	NA	NA	NA	NA	NA	NA	NA	NA	NA	NA	NA	NA	NA	NA	NA	NA	NA	NA	NA
372	CP002267.1	linear	20974	Bacteria	Spirochaetes	Spirochaetia	Spirochaetales	Borreliaceae	Borreliella	Borreliella burgdorferi	Borrelia burgdorferi 297 plasmid 297_lp28-5, complete sequence	NA	NA	NA	taxon:521009	NA	NA	NA	NA	genomic DNA	Borrelia burgdorferi 297	297_lp28-5	297	NA	NA	NA	NA	NA	NA	NA	NA	NA	NA	NA	NA	NA	NA	NA	NA	NA	NA	NA	NA	NA	NA	NA	NA	NA	NA
373	CP002268.1	circular	26514	Bacteria	Spirochaetes	Spirochaetia	Spirochaetales	Borreliaceae	Borreliella	Borreliella burgdorferi	Borrelia burgdorferi 297 plasmid 297_cp26, complete sequence	NA	NA	NA	taxon:521009	NA	NA	NA	NA	genomic DNA	Borrelia burgdorferi 297	297_cp26	297	NA	NA	NA	NA	NA	NA	NA	NA	NA	NA	NA	NA	NA	NA	NA	NA	NA	NA	NA	NA	NA	NA	NA	NA	NA	NA
374	CP002269.1	circular	30262	Bacteria	Spirochaetes	Spirochaetia	Spirochaetales	Borreliaceae	Borreliella	Borreliella burgdorferi	Borrelia burgdorferi 297 plasmid 297_cp32-3, complete sequence	NA	NA	NA	taxon:521009	NA	NA	NA	NA	genomic DNA	Borrelia burgdorferi 297	297_cp32-3	297	NA	NA	NA	NA	NA	NA	NA	NA	NA	NA	NA	NA	NA	NA	NA	NA	NA	NA	NA	NA	NA	NA	NA	NA	NA	NA
375	CP002270.1	circular	30301	Bacteria	Spirochaetes	Spirochaetia	Spirochaetales	Borreliaceae	Borreliella	Borreliella burgdorferi	Borrelia burgdorferi 297 plasmid 297_cp32-4, complete sequence	NA	NA	NA	taxon:521009	NA	NA	NA	NA	genomic DNA	Borrelia burgdorferi 297	297_cp32-4	297	NA	NA	NA	NA	NA	NA	NA	NA	NA	NA	NA	NA	NA	NA	NA	NA	NA	NA	NA	NA	NA	NA	NA	NA	NA	NA
376	CP002441.1	circular	39054	Bacteria	Proteobacteria	Betaproteobacteria	Neisseriales	Neisseriaceae	Neisseria	Neisseria gonorrhoeae	Neisseria gonorrhoeae TCDC-NG08107 plasmid pNGTCDC08107, complete sequence	NA	May-2008	Taiwan: Taipei	taxon:940296	NA	Homo sapiens	17 year-old male	NA	genomic DNA	Neisseria gonorrhoeae TCDC-NG08107	pNGTCDC08107	TCDC-NG08107	NA	NA	NA	NA	NA	NA	NA	NA	NA	NA	NA	NA	NA	NA	NA	NA	NA	NA	NA	NA	NA	NA	NA	NA	NA	NA
377	CP002473.1	circular	5247	Bacteria	Proteobacteria	Gammaproteobacteria	Enterobacterales	Enterobacteriaceae	Klebsiella	Klebsiella pneumoniae	Klebsiella pneumoniae plasmid pUUH239.1, complete sequence	NA	NA	NA	taxon:573	NA	NA	NA	NA	genomic DNA	Klebsiella pneumoniae	pUUH239.1	U-0608239	NA	NA	NA	NA	NA	NA	NA	NA	NA	NA	NA	NA	NA	NA	NA	NA	NA	NA	NA	NA	NA	NA	NA	NA	NA	NA
378	CP002474.1	circular	220824	Bacteria	Proteobacteria	Gammaproteobacteria	Enterobacterales	Enterobacteriaceae	Klebsiella	Klebsiella pneumoniae	Klebsiella pneumoniae plasmid pUUH239.2, complete sequence	NA	NA	NA	taxon:573	NA	NA	NA	NA	genomic DNA	Klebsiella pneumoniae	pUUH239.2	U-0608239	NA	NA	NA	NA	NA	NA	NA	NA	NA	NA	NA	NA	NA	NA	NA	NA	NA	NA	NA	NA	NA	NA	NA	NA	NA	NA
379	CP002523.1	circular	8731	Bacteria	Proteobacteria	Gammaproteobacteria	Pseudomonadales	Moraxellaceae	Acinetobacter	Acinetobacter baumannii	Acinetobacter baumannii TCDC-AB0715 plasmid p1ABTCDC0715, complete sequence	NA	NA	NA	taxon:980514	NA	NA	NA	NA	genomic DNA	Acinetobacter baumannii TCDC-AB0715	p1ABTCDC0715	TCDC-AB0715	NA	NA	NA	NA	NA	NA	NA	NA	NA	NA	NA	NA	NA	NA	NA	NA	NA	NA	NA	NA	NA	NA	NA	NA	NA	NA
380	CP002524.1	circular	70894	Bacteria	Proteobacteria	Gammaproteobacteria	Pseudomonadales	Moraxellaceae	Acinetobacter	Acinetobacter baumannii	Acinetobacter baumannii TCDC-AB0715 plasmid p2ABTCDC0715, complete sequence	NA	NA	NA	taxon:980514	NA	NA	NA	NA	genomic DNA	Acinetobacter baumannii TCDC-AB0715	p2ABTCDC0715	TCDC-AB0715	NA	NA	NA	NA	NA	NA	NA	NA	NA	NA	NA	NA	NA	NA	NA	NA	NA	NA	NA	NA	NA	NA	NA	NA	NA	NA
381	CP002642.1	circular	31972	Bacteria	Proteobacteria	Alphaproteobacteria	Rickettsiales	Rickettsiaceae	Rickettsia	Rickettsia amblyommatis	Candidatus Rickettsia amblyommii AaR/SC plasmid pRAM32, complete sequence	NA	NA	NA	taxon:933950	NA	NA	NA	NA	genomic DNA	Rickettsia amblyommatis str. AaR/SC	pRAM32	AaR/SC	NA	NA	NA	NA	NA	NA	NA	NA	NA	NA	NA	NA	NA	NA	NA	NA	NA	NA	NA	NA	NA	NA	NA	NA	NA	NA
382	CP002962.1	linear	190222	Bacteria	Bacteroidetes	Cytophagia	Cytophagales	Cytophagaceae	Emticicia	Emticicia oligotrophica	Emticicia oligotrophica DSM 17448 plasmid pEMTOL01, complete sequence	NA	NA	India: Assam, Jorhat	taxon:929562	NA	NA	warm spring water	26.7560 N 94.2094 E	genomic DNA	Emticicia oligotrophica DSM 17448	pEMTOL01	DSM 17448	NA	NA	NA	NA	NA	NA	DSM:17448	NA	NA	NA	NA	NA	NA	NA	NA	NA	NA	NA	NA	NA	NA	NA	NA	NA	NA	NA
383	CP002963.1	linear	100312	Bacteria	Bacteroidetes	Cytophagia	Cytophagales	Cytophagaceae	Emticicia	Emticicia oligotrophica	Emticicia oligotrophica DSM 17448 plasmid pEMTOL02, complete sequence	NA	NA	India: Assam, Jorhat	taxon:929562	NA	NA	warm spring water	26.7560 N 94.2094 E	genomic DNA	Emticicia oligotrophica DSM 17448	pEMTOL02	DSM 17448	NA	NA	NA	NA	NA	NA	DSM:17448	NA	NA	NA	NA	NA	NA	NA	NA	NA	NA	NA	NA	NA	NA	NA	NA	NA	NA	NA
384	CP002964.1	linear	58952	Bacteria	Bacteroidetes	Cytophagia	Cytophagales	Cytophagaceae	Emticicia	Emticicia oligotrophica	Emticicia oligotrophica DSM 17448 plasmid pEMTOL03, complete sequence	NA	NA	India: Assam, Jorhat	taxon:929562	NA	NA	warm spring water	26.7560 N 94.2094 E	genomic DNA	Emticicia oligotrophica DSM 17448	pEMTOL03	DSM 17448	NA	NA	NA	NA	NA	NA	DSM:17448	NA	NA	NA	NA	NA	NA	NA	NA	NA	NA	NA	NA	NA	NA	NA	NA	NA	NA	NA
385	CP002965.1	linear	38576	Bacteria	Bacteroidetes	Cytophagia	Cytophagales	Cytophagaceae	Emticicia	Emticicia oligotrophica	Emticicia oligotrophica DSM 17448 plasmid pEMTOL04, complete sequence	NA	NA	India: Assam, Jorhat	taxon:929562	NA	NA	warm spring water	26.7560 N 94.2094 E	genomic DNA	Emticicia oligotrophica DSM 17448	pEMTOL04	DSM 17448	NA	NA	NA	NA	NA	NA	DSM:17448	NA	NA	NA	NA	NA	NA	NA	NA	NA	NA	NA	NA	NA	NA	NA	NA	NA	NA	NA
386	CP002966.1	linear	34141	Bacteria	Bacteroidetes	Cytophagia	Cytophagales	Cytophagaceae	Emticicia	Emticicia oligotrophica	Emticicia oligotrophica DSM 17448 plasmid pEMTOL05, complete sequence	NA	NA	India: Assam, Jorhat	taxon:929562	NA	NA	warm spring water	26.7560 N 94.2094 E	genomic DNA	Emticicia oligotrophica DSM 17448	pEMTOL05	DSM 17448	NA	NA	NA	NA	NA	NA	DSM:17448	NA	NA	NA	NA	NA	NA	NA	NA	NA	NA	NA	NA	NA	NA	NA	NA	NA	NA	NA
387	CP002969.1	circular	5360	Bacteria	Proteobacteria	Gammaproteobacteria	Enterobacterales	Enterobacteriaceae	Escherichia	Escherichia coli	Escherichia coli W plasmid pRK2, complete sequence	NA	NA	NA	taxon:566546	NA	NA	NA	NA	genomic DNA	Escherichia coli W	pRK2	W	NA	NA	NA	NA	NA	NA	ATCC:9637	NA	NA	NA	NA	NA	NA	NA	NA	NA	NA	NA	NA	NA	NA	NA	NA	NA	NA	NA
388	CP003180.1	circular	84933	Bacteria	Firmicutes	Clostridia	Clostridiales	Clostridiales Family XVII. Incertae Sedis	Sulfobacillus	Sulfobacillus acidophilus	Sulfobacillus acidophilus DSM 10332 plasmid, complete sequence	P. R. Norris	NA	United Kingdom	taxon:679936	NA	NA	coal spoil heap	52.64 N 1.64 W	genomic DNA	Sulfobacillus acidophilus DSM 10332	unnamed	DSM 10332	NA	NA	NA	NA	NA	NA	DSM:10332	NA	NA	NA	NA	NA	NA	NA	NA	NA	NA	NA	NA	NA	NA	NA	NA	NA	NA	NA
389	CP003185.1	circular	110881	Bacteria	Firmicutes	Clostridia	Thermoanaerobacterales	Thermoanaerobacterales Family III. Incertae Sedis	Thermoanaerobacterium	Thermoanaerobacterium saccharolyticum	Thermoanaerobacterium saccharolyticum JW/SL-YS485 plasmid pMU3262, complete genome	NA	NA	NA	taxon:1094508	NA	NA	NA	NA	genomic DNA	Thermoanaerobacterium saccharolyticum JW/SL-YS485	pMU3262	JW/SL-YS485	NA	NA	NA	NA	NA	NA	DSM:8691	NA	NA	NA	NA	NA	NA	NA	NA	NA	NA	NA	NA	NA	NA	NA	NA	NA	NA	NA
390	CP003420.1	circular	22406	Bacteria	Proteobacteria	Epsilonproteobacteria	Campylobacterales	Helicobacteraceae	Helicobacter	Helicobacter pylori	Helicobacter pylori XZ274 plasmid pXZ274, complete sequence	NA	NA	China	taxon:1127122	NA	Homo sapiens	female gastric cancer patient	NA	genomic DNA	Helicobacter pylori XZ274	pXZ274	XZ274	NA	NA	NA	NA	NA	NA	NA	NA	NA	NA	NA	NA	NA	NA	NA	NA	NA	NA	NA	NA	NA	NA	NA	NA	NA	NA
391	CP003505.2	circular	56265	Bacteria	Actinobacteria	Actinobacteria	Corynebacteriales	Mycobacteriaceae	Mycobacteroides	Mycobacteroides abscessus	Mycobacterium abscessus subsp. bolletii F1725 plasmid BRA100, complete sequence	NA	2007-11-08	Brazil	taxon:1168066	NA	NA	biopsy channel of a flexible bronchoscope	NA	genomic DNA	Mycobacteroides abscessus subsp. bolletii F1725	BRA100	F1725	NA	bolletii	NA	NA	survives 2% alkaline glutaraldehyde exposure for 10 hours	NA	NA	NA	NA	NA	NA	NA	NA	NA	NA	NA	NA	NA	NA	NA	NA	NA	NA	NA	NA	NA
392	CP003584.1	circular	36262	Bacteria	Firmicutes	Bacilli	Lactobacillales	Enterococcaceae	Enterococcus	Enterococcus faecium	Enterococcus faecium DO plasmid 1, complete sequence	NA	NA	USA: University of Texas Medical School	taxon:333849	NA	Homo sapiens	NA	NA	genomic DNA	Enterococcus faecium DO	1	DO	NA	NA	NA	NA	NA	NA	NA	NA	NA	NA	NA	NA	NA	NA	NA	NA	NA	NA	NA	NA	NA	NA	NA	NA	NA	NA
393	CP003585.1	circular	66247	Bacteria	Firmicutes	Bacilli	Lactobacillales	Enterococcaceae	Enterococcus	Enterococcus faecium	Enterococcus faecium DO plasmid 2, complete sequence	NA	NA	USA: University of Texas Medical School	taxon:333849	NA	Homo sapiens	NA	NA	genomic DNA	Enterococcus faecium DO	2	DO	NA	NA	NA	NA	NA	NA	NA	NA	NA	NA	NA	NA	NA	NA	NA	NA	NA	NA	NA	NA	NA	NA	NA	NA	NA	NA
394	CP003586.1	circular	251926	Bacteria	Firmicutes	Bacilli	Lactobacillales	Enterococcaceae	Enterococcus	Enterococcus faecium	Enterococcus faecium DO plasmid 3, complete sequence	NA	NA	USA: University of Texas Medical School	taxon:333849	NA	Homo sapiens	NA	NA	genomic DNA	Enterococcus faecium DO	3	DO	NA	NA	NA	NA	NA	NA	NA	NA	NA	NA	NA	NA	NA	NA	NA	NA	NA	NA	NA	NA	NA	NA	NA	NA	NA	NA
395	CP003812.1	circular	7487	Bacteria	Chlamydiae	Chlamydiia	Chlamydiales	Chlamydiaceae	Chlamydia	Chlamydia psittaci	Chlamydia psittaci 84/55 plasmid pcp8455, complete sequence	NA	NA	Germany	taxon:1218176	NA	Amazona sp.	lungs of a diseased parakeet	NA	genomic DNA	Chlamydia psittaci 84/55	pcp8455	84/55	NA	NA	NA	NA	NA	NA	NA	NA	NA	NA	NA	NA	NA	NA	NA	NA	NA	NA	NA	NA	NA	NA	NA	NA	NA	NA
396	CP003817.1	circular	7553	Bacteria	Chlamydiae	Chlamydiia	Chlamydiales	Chlamydiaceae	Chlamydia	Chlamydia psittaci	Chlamydia psittaci VS225 plasmid pcpVS225, complete sequence	NA	1991	USA	taxon:1218355	NA	parakeet	NA	NA	genomic DNA	Chlamydia psittaci VS225	pcpVS225	VS225	NA	NA	NA	NA	NA	NA	NA	NA	NA	NA	NA	NA	NA	NA	NA	NA	NA	NA	NA	NA	NA	NA	NA	NA	NA	NA
397	CP003921.1	circular	1452	Bacteria	Proteobacteria	Epsilonproteobacteria	Campylobacterales	Helicobacteraceae	Sulfuricurvum	Candidatus Sulfuricurvum sp. RIFRC-1	Candidatus Sulfuricurvum sp. RIFRC-1 plasmid, complete sequence	NA	2007	USA: Colorado	taxon:1249480	NA	NA	subsurface sediment from a freshwater well	39.5291 N 107.0772 W	genomic DNA	Candidatus Sulfuricurvum sp. RIFRC-1	unnamed	NA	NA	NA	NA	RIFRC-1	NA	NA	NA	NA	NA	NA	NA	NA	NA	NA		NA	NA	NA	NA	NA	NA	NA	NA	NA	NA	NA
398	CP003975.1	circular	4153	Bacteria	Proteobacteria	Betaproteobacteria	Neisseriales	Neisseriaceae	Neisseria	Neisseria gonorrhoeae	Neisseria gonorrhoeae NG-k51.05 plasmid pNG-k51.05, complete sequence	RIPCM	2005	Russia: Kaluga	taxon:1247414	NA	Homo sapiens	male	NA	genomic DNA	Neisseria gonorrhoeae NG-k51.05	pNG-k51.05	NG-k51.05	NA	NA	NA	NA	NA	NA	NA	NA	NA	NA	NA	NA	NA	NA	NA	NA	NA	NA	NA	NA	NA	NA	NA	NA	NA	NA
399	CP003983.1	circular	744	Bacteria	Proteobacteria	Betaproteobacteria	NA	NA	Candidatus Tremblaya	Candidatus Tremblaya phenacola	Candidatus Tremblaya phenacola PAVE plasmid, complete sequence	NA	NA	NA	taxon:1266371	NA	NA	NA	NA	genomic DNA	Candidatus Tremblaya phenacola PAVE	unnamed	PAVE	NA	NA	NA	NA	NA	NA	NA	NA	NA	NA	NA	NA	NA	NA	NA	NA	NA	NA	NA	NA	NA	NA	NA	NA	NA	NA
400	CP004366.2	circular	53081	Bacteria	Proteobacteria	Gammaproteobacteria	Enterobacterales	Enterobacteriaceae	Klebsiella	Klebsiella pneumoniae	Klebsiella pneumoniae FCF1305 plasmid pKPC_FCF13/05, complete sequence	NA	2005	Brazil	taxon:1087446	NA	Homo sapiens	NA	NA	genomic DNA	Klebsiella pneumoniae FCF1305	pKPC_FCF13/05	FCF1305	NA	NA	NA	NA	NA	NA	NA	NA	NA	NA	NA	NA	NA	NA	NA	NA	NA	NA	NA	NA	NA	NA	NA	NA	NA	NA
401	CP004367.2	circular	54605	Bacteria	Proteobacteria	Gammaproteobacteria	Enterobacterales	Enterobacteriaceae	Klebsiella	Klebsiella pneumoniae	Klebsiella pneumoniae FCF3SP plasmid pKPC_FCF/3SP, complete sequence	NA	2009	Brazil	taxon:1087447	NA	Homo sapiens	NA	NA	genomic DNA	Klebsiella pneumoniae FCF3SP	pKPC_FCF/3SP	FCF3SP	NA	NA	NA	NA	NA	NA	NA	NA	NA	NA	NA	NA	NA	NA	NA	NA	NA	NA	NA	NA	NA	NA	NA	NA	NA	NA
402	CP004847.1	circular	200847	Bacteria	Proteobacteria	Gammaproteobacteria	Alteromonadales	Alteromonadaceae	Alteromonas	Alteromonas mediterranea	Alteromonas mediterranea 615 strain English Channel 615 plasmid unnamed, complete sequence	NA	NA	NA	taxon:1300253	NA	NA	NA	NA	genomic DNA	Alteromonas mediterranea 615	unnamed	English Channel 615	NA	NA	NA	NA	NA	NA	DSM:26506	NA	NA	NA	NA	NA	NA	NA	NA	NA	NA	NA	NA	NA	NA	NA	NA	NA	NA	NA
403	CP004850.1	circular	303282	Bacteria	Proteobacteria	Gammaproteobacteria	Alteromonadales	Alteromonadaceae	Alteromonas	Alteromonas mediterranea	Alteromonas mediterranea U4 strain Ionian Sea U4 plasmid unnamed, complete sequence	NA	NA	NA	taxon:1300255	NA	NA	NA	NA	genomic DNA	Alteromonas mediterranea U4	unnamed	Ionian Sea U4	NA	NA	NA	NA	NA	NA	DSM:26501	NA	NA	NA	NA	NA	NA	NA	NA	NA	NA	NA	NA	NA	NA	NA	NA	NA	NA	NA
404	CP004861.1	circular	293574	Bacteria	Firmicutes	Bacilli	Bacillales	Bacillaceae	Bacillus	Bacillus thuringiensis	Bacillus thuringiensis serovar kurstaki str. YBT-1520 plasmid pBMB293, complete sequence	NA	1990	China	taxon:570416	NA	NA	soil	NA	genomic DNA	Bacillus thuringiensis serovar kurstaki str. YBT-1520	pBMB293	YBT-1520	kurstaki	NA	NA	NA	NA	NA	NA	NA	NA	NA	NA	NA	NA	NA	NA	NA	NA	NA	NA	NA	NA	NA	NA	NA	NA	NA
405	CP004866.1	circular	7921	Bacteria	Firmicutes	Bacilli	Bacillales	Bacillaceae	Bacillus	Bacillus thuringiensis	Bacillus thuringiensis serovar kurstaki str. YBT-1520 plasmid pBMB7921, complete sequence	NA	1990	China	taxon:570416	NA	NA	soil	NA	genomic DNA	Bacillus thuringiensis serovar kurstaki str. YBT-1520	pBMB7921	YBT-1520	kurstaki	NA	NA	NA	NA	NA	NA	NA	NA	NA	NA	NA	NA	NA	NA	NA	NA	NA	NA	NA	NA	NA	NA	NA	NA	NA
406	CP004867.1	circular	7635	Bacteria	Firmicutes	Bacilli	Bacillales	Bacillaceae	Bacillus	Bacillus thuringiensis	Bacillus thuringiensis serovar kurstaki str. YBT-1520 plasmid pBMB7635, complete sequence	NA	1990	China	taxon:570416	NA	NA	soil	NA	genomic DNA	Bacillus thuringiensis serovar kurstaki str. YBT-1520	pBMB7635	YBT-1520	kurstaki	NA	NA	NA	NA	NA	NA	NA	NA	NA	NA	NA	NA	NA	NA	NA	NA	NA	NA	NA	NA	NA	NA	NA	NA	NA
407	CP005289.1	circular	2908	Bacteria	Firmicutes	Bacilli	Bacillales	Staphylococcaceae	Staphylococcus	Staphylococcus aureus	Staphylococcus aureus strain Bmb9393 plasmid pBmb9393, complete sequence	NA	NA	NA	taxon:1280	NA	NA	NA	NA	genomic DNA	Staphylococcus aureus	pBmb9393	Bmb9393	NA	NA	NA	NA	NA	NA	NA	NA	NA	NA	NA	NA	NA	NA	NA	NA	NA	NA	NA	NA	NA	NA	NA	NA	NA	NA
408	CP005978.1	circular	15324	Bacteria	Firmicutes	Bacilli	Lactobacillales	Lactobacillaceae	Lactobacillus	Lactobacillus brevis	Lactobacillus brevis BSO 464 plasmid pLb464-1, complete sequence	NA	NA	United Kingdom: England	taxon:1334191	NA	NA	Brewery	NA	genomic DNA	Lactobacillus brevis BSO 464	pLb464-1	BSO 464	NA	NA	NA	NA	NA	NA	NA	NA	NA	NA	NA	NA	NA	NA	NA	NA	NA	NA	NA	NA	NA	NA	NA	NA	NA	NA
409	CP005979.1	circular	28459	Bacteria	Firmicutes	Bacilli	Lactobacillales	Lactobacillaceae	Lactobacillus	Lactobacillus brevis	Lactobacillus brevis BSO 464 plasmid pLb464-2, complete sequence	NA	NA	United Kingdom: England	taxon:1334191	NA	NA	Brewery	NA	genomic DNA	Lactobacillus brevis BSO 464	pLb464-2	BSO 464	NA	NA	NA	NA	NA	NA	NA	NA	NA	NA	NA	NA	NA	NA	NA	NA	NA	NA	NA	NA	NA	NA	NA	NA	NA	NA
410	CP005980.1	circular	22411	Bacteria	Firmicutes	Bacilli	Lactobacillales	Lactobacillaceae	Lactobacillus	Lactobacillus brevis	Lactobacillus brevis BSO 464 plasmid pLb464-3, complete sequence	NA	NA	United Kingdom: England	taxon:1334191	NA	NA	Brewery	NA	genomic DNA	Lactobacillus brevis BSO 464	pLb464-3	BSO 464	NA	NA	NA	NA	NA	NA	NA	NA	NA	NA	NA	NA	NA	NA	NA	NA	NA	NA	NA	NA	NA	NA	NA	NA	NA	NA
411	CP005981.1	circular	84941	Bacteria	Firmicutes	Bacilli	Lactobacillales	Lactobacillaceae	Lactobacillus	Lactobacillus brevis	Lactobacillus brevis BSO 464 plasmid pLb464-4, complete sequence	NA	NA	United Kingdom: England	taxon:1334191	NA	NA	Brewery	NA	genomic DNA	Lactobacillus brevis BSO 464	pLb464-4	BSO 464	NA	NA	NA	NA	NA	NA	NA	NA	NA	NA	NA	NA	NA	NA	NA	NA	NA	NA	NA	NA	NA	NA	NA	NA	NA	NA
412	CP005982.1	circular	10867	Bacteria	Firmicutes	Bacilli	Lactobacillales	Lactobacillaceae	Lactobacillus	Lactobacillus brevis	Lactobacillus brevis BSO 464 plasmid pLb464-5, complete sequence	NA	NA	United Kingdom: England	taxon:1334191	NA	NA	Brewery	NA	genomic DNA	Lactobacillus brevis BSO 464	pLb464-5	BSO 464	NA	NA	NA	NA	NA	NA	NA	NA	NA	NA	NA	NA	NA	NA	NA	NA	NA	NA	NA	NA	NA	NA	NA	NA	NA	NA
413	CP005983.1	circular	5018	Bacteria	Firmicutes	Bacilli	Lactobacillales	Lactobacillaceae	Lactobacillus	Lactobacillus brevis	Lactobacillus brevis BSO 464 plasmid pLb464-6, complete sequence	NA	NA	United Kingdom: England	taxon:1334191	NA	NA	Brewery	NA	genomic DNA	Lactobacillus brevis BSO 464	pLb464-6	BSO 464	NA	NA	NA	NA	NA	NA	NA	NA	NA	NA	NA	NA	NA	NA	NA	NA	NA	NA	NA	NA	NA	NA	NA	NA	NA	NA
414	CP005984.1	circular	2353	Bacteria	Firmicutes	Bacilli	Lactobacillales	Lactobacillaceae	Lactobacillus	Lactobacillus brevis	Lactobacillus brevis BSO 464 plasmid pLb464-7, complete sequence	NA	NA	United Kingdom: England	taxon:1334191	NA	NA	Brewery	NA	genomic DNA	Lactobacillus brevis BSO 464	pLb464-7	BSO 464	NA	NA	NA	NA	NA	NA	NA	NA	NA	NA	NA	NA	NA	NA	NA	NA	NA	NA	NA	NA	NA	NA	NA	NA	NA	NA
415	CP005999.1	circular	89507	Bacteria	Proteobacteria	Gammaproteobacteria	Enterobacterales	Enterobacteriaceae	Escherichia	Escherichia coli	Escherichia coli B7A plasmid pEB1, complete sequence	NA	1971-07-01	Viet Nam	taxon:340184	NA	NA	stool	NA	genomic DNA	Escherichia coli B7A	pEB1	B7A	NA	NA	NA	NA	NA	NA	NA	NA	NA	NA	NA	NA	NA	NA	NA	NA	NA	NA	NA	NA	NA	NA	NA	NA	NA	NA
416	CP006000.1	circular	52028	Bacteria	Proteobacteria	Gammaproteobacteria	Enterobacterales	Enterobacteriaceae	Escherichia	Escherichia coli	Escherichia coli B7A plasmid pEB2, complete sequence	NA	1971-07-01	Viet Nam	taxon:340184	NA	NA	stool	NA	genomic DNA	Escherichia coli B7A	pEB2	B7A	NA	NA	NA	NA	NA	NA	NA	NA	NA	NA	NA	NA	NA	NA	NA	NA	NA	NA	NA	NA	NA	NA	NA	NA	NA	NA
417	CP006001.1	circular	66341	Bacteria	Proteobacteria	Gammaproteobacteria	Enterobacterales	Enterobacteriaceae	Escherichia	Escherichia coli	Escherichia coli B7A plasmid pEB3, complete sequence	NA	1971-07-01	Viet Nam	taxon:340184	NA	NA	stool	NA	genomic DNA	Escherichia coli B7A	pEB3	B7A	NA	NA	NA	NA	NA	NA	NA	NA	NA	NA	NA	NA	NA	NA	NA	NA	NA	NA	NA	NA	NA	NA	NA	NA	NA	NA
418	CP006002.1	circular	78167	Bacteria	Proteobacteria	Gammaproteobacteria	Enterobacterales	Enterobacteriaceae	Escherichia	Escherichia coli	Escherichia coli B7A plasmid pEB4, complete sequence	NA	1971-07-01	Viet Nam	taxon:340184	NA	NA	stool	NA	genomic DNA	Escherichia coli B7A	pEB4	B7A	NA	NA	NA	NA	NA	NA	NA	NA	NA	NA	NA	NA	NA	NA	NA	NA	NA	NA	NA	NA	NA	NA	NA	NA	NA	NA
419	CP006737.1	circular	177681	Bacteria	Proteobacteria	Gammaproteobacteria	Enterobacterales	Enterobacteriaceae	Shigella	Shigella dysenteriae	Shigella dysenteriae 1617 plasmid pSLG231, complete sequence	NA	NA	Guatemala	taxon:754093	NA	Homo sapiens	NA	NA	genomic DNA	Shigella dysenteriae 1617	pSLG231	1617	NA	NA	NA	NA	NA	NA	NA	NA	NA	NA	NA	NA	NA	NA	NA	NA	NA	NA	NA	NA	NA	NA	NA	NA	NA	NA
420	CP007038.1	circular	222586	Bacteria	Proteobacteria	Gammaproteobacteria	Enterobacterales	Enterobacteriaceae	Shigella	Shigella flexneri	Shigella flexneri G1663 plasmid pG1663, complete sequence	NA	NA	NA	taxon:1435046	NA	Homo sapiens	stool sample	NA	genomic DNA	Shigella flexneri G1663	pG1663	G1663	NA	NA	NA	NA	NA	NA	NA	2a	NA	NA	NA	NA	NA	NA	NA	NA	NA	NA	NA	NA	NA	NA	NA	NA	NA	NA
421	CP007150.1	circular	114231	Bacteria	Proteobacteria	Gammaproteobacteria	Enterobacterales	Enterobacteriaceae	Escherichia	Escherichia coli	Escherichia coli RS218 plasmid pRS218, complete sequence	NA	NA	NA	taxon:439184	NA	NA	NA	NA	genomic DNA	Escherichia coli RS218	pRS218	RS218	NA	NA	NA	NA	NA	NA	NA	NA	NA	NA	NA	NA	NA	NA	NA	NA	NA	NA	NA	NA	NA	NA	NA	NA	NA	NA
422	CP007182.1	circular	47962	Bacteria	Proteobacteria	Epsilonproteobacteria	Campylobacterales	Campylobacteraceae	Campylobacter	Campylobacter coli	Campylobacter coli RM4661 plasmid pRM4661_48kbp, complete sequence	NA	NA	NA	taxon:1183379	NA	NA	NA	NA	genomic DNA	Campylobacter coli RM4661	pRM4661_48kbp	RM4661	NA	NA	NA	NA	NA	NA	NA	NA	NA	NA	NA	NA	NA	NA	NA	NA	NA	NA	NA	NA	NA	NA	NA	NA	NA	NA
423	CP007550.1	circular	8731	Bacteria	Proteobacteria	Gammaproteobacteria	Pseudomonadales	Moraxellaceae	Acinetobacter	Acinetobacter baumannii	Acinetobacter baumannii AC12 plasmid pAC12, complete sequence	NA	2011	Malaysia: Hospital Sultanah Nur Zahirah, Kuala Terengganu	taxon:1198108	NA	Homo sapiens	blood	NA	genomic DNA	Acinetobacter baumannii AC12	pAC12	AC12	NA	NA	NA	NA	NA	NA	NA	NA	NA	NA	NA	NA	NA	NA	NA	NA	NA	NA	NA	NA	NA	NA	NA	NA	NA	NA
424	CP007578.1	circular	8685	Bacteria	Proteobacteria	Gammaproteobacteria	Pseudomonadales	Moraxellaceae	Acinetobacter	Acinetobacter baumannii	Acinetobacter baumannii AC30 plasmid pAC30a, complete sequence	NA	2011	Malaysia: Koala Terenggeanu	taxon:1224747	NA	Homo sapiens	endotrachial secretion	NA	genomic DNA	Acinetobacter baumannii AC30	pAC30a	AC30	NA	NA	NA	NA	NA	NA	NA	NA	NA	NA	NA	NA	NA	NA	NA	NA	NA	NA	NA	NA	NA	NA	NA	NA	NA	NA
425	CP007579.1	circular	16236	Bacteria	Proteobacteria	Gammaproteobacteria	Pseudomonadales	Moraxellaceae	Acinetobacter	Acinetobacter baumannii	Acinetobacter baumannii AC30 plasmid pAC30b, complete sequence	NA	2011	Malaysia: Koala Terenggeanu	taxon:1224747	NA	Homo sapiens	endotrachial secretion	NA	genomic DNA	Acinetobacter baumannii AC30	pAC30b	AC30	NA	NA	NA	NA	NA	NA	NA	NA	NA	NA	NA	NA	NA	NA	NA	NA	NA	NA	NA	NA	NA	NA	NA	NA	NA	NA
426	CP007580.1	circular	71433	Bacteria	Proteobacteria	Gammaproteobacteria	Pseudomonadales	Moraxellaceae	Acinetobacter	Acinetobacter baumannii	Acinetobacter baumannii AC30 plasmid pAC30c, complete sequence	NA	2011	Malaysia: Koala Terenggeanu	taxon:1224747	NA	Homo sapiens	endotrachial secretion	NA	genomic DNA	Acinetobacter baumannii AC30	pAC30c	AC30	NA	NA	NA	NA	NA	NA	NA	NA	NA	NA	NA	NA	NA	NA	NA	NA	NA	NA	NA	NA	NA	NA	NA	NA	NA	NA
427	CP007608.1	circular	2062	Bacteria	Firmicutes	Bacilli	Bacillales	Bacillaceae	Bacillus	Bacillus thuringiensis	Bacillus thuringiensis serovar kurstaki str. YBT-1520 plasmid pBMB2062, complete sequence	NA	NA	NA	taxon:570416	NA	NA	NA	NA	genomic DNA	Bacillus thuringiensis serovar kurstaki str. YBT-1520	pBMB2062	YBT-1520	kurstaki	NA	NA	NA	NA	NA	NA	NA	NA	NA	NA	NA	NA	NA	NA	NA	NA	NA	NA	NA	NA	NA	NA	NA	NA	NA
428	CP007609.1	circular	7921	Bacteria	Firmicutes	Bacilli	Bacillales	Bacillaceae	Bacillus	Bacillus thuringiensis	Bacillus thuringiensis serovar kurstaki str. YBT-1520 plasmid pBMB7921, complete sequence	NA	NA	NA	taxon:570416	NA	NA	NA	NA	genomic DNA	Bacillus thuringiensis serovar kurstaki str. YBT-1520	pBMB7921	YBT-1520	kurstaki	NA	NA	NA	NA	NA	NA	NA	NA	NA	NA	NA	NA	NA	NA	NA	NA	NA	NA	NA	NA	NA	NA	NA	NA	NA
429	CP007615.1	circular	293574	Bacteria	Firmicutes	Bacilli	Bacillales	Bacillaceae	Bacillus	Bacillus thuringiensis	Bacillus thuringiensis serovar kurstaki str. YBT-1520 plasmid pBMB293, complete sequence	NA	NA	NA	taxon:570416	NA	NA	NA	NA	genomic DNA	Bacillus thuringiensis serovar kurstaki str. YBT-1520	pBMB293	YBT-1520	kurstaki	NA	NA	NA	NA	NA	NA	NA	NA	NA	NA	NA	NA	NA	NA	NA	NA	NA	NA	NA	NA	NA	NA	NA	NA	NA
430	CP007745.1	circular	203123	Bacteria	Proteobacteria	Betaproteobacteria	Burkholderiales	Burkholderiaceae	Burkholderia	Burkholderia cepacia	Burkholderia cepacia ATCC 25416 plasmid, complete sequence	NA	NA	NA	taxon:983594	NA	NA	NA	NA	genomic DNA	Burkholderia cepacia ATCC 25416	unnamed	ATCC 25416	NA	NA	NA	NA	NA	NA	ATCC:25416	NA	NA	NA	NA	NA	NA	NA	NA	NA	NA	NA	NA	NA	NA	NA	NA	NA	NA	NA
431	CP007752.1	circular	46761	Bacteria	Proteobacteria	Epsilonproteobacteria	Campylobacterales	Campylobacteraceae	Campylobacter	Campylobacter jejuni	Campylobacter jejuni subsp. jejuni D42a plasmid pTet-D42a, complete sequence	Dr. Bibiana Law	2007	USA	taxon:1349826	NA	NA	Chicken cecum	NA	genomic DNA	Campylobacter jejuni subsp. jejuni D42a	pTet-D42a	D42a	NA	jejuni	NA	NA	NA	NA	NA	NA	NA	NA	NA	NA	NA	NA	NA	NA	NA	NA	NA	NA	NA	NA	NA	NA	NA	NA
432	CP008701.1	circular	186323	Bacteria	Proteobacteria	Gammaproteobacteria	Enterobacterales	Enterobacteriaceae	Klebsiella	Klebsiella pneumoniae	Klebsiella pneumoniae subsp. pneumoniae KP5-1 plasmid pKp5-1, complete sequence	Alois Bell	2005	USA	taxon:1199150	NA	Nezara viridula (Cotton Pathogen Vector; southern green stink bug)	NA	30.60 N 96.31 W	genomic DNA	Klebsiella pneumoniae subsp. pneumoniae KP5-1	pKp5-1	Kp5-1	NA	pneumoniae	NA	NA	NA	NA	NA	NA	NA	NA	112 m	NA	NA	NA	NA	NA	NA	NA	NA	NA	NA	NA	NA	NA	NA	NA
433	CP008733.1	circular	101321	Bacteria	Proteobacteria	Gammaproteobacteria	Enterobacterales	Enterobacteriaceae	Escherichia	Escherichia coli	Escherichia coli strain E17.16 plasmid pE17.16, complete sequence	NA	NA	NA	taxon:562	NA	NA	NA	NA	genomic DNA	Escherichia coli	pE17.16	E17.16	NA	NA	NA	NA	NA	NA	NA	NA	NA	NA	NA	NA	NA	NA	NA	NA	NA	NA	NA	NA	NA	NA	NA	NA	NA	NA
434	CP008734.1	circular	89503	Bacteria	Proteobacteria	Gammaproteobacteria	Enterobacterales	Enterobacteriaceae	Escherichia	Escherichia coli	Escherichia coli strain ESBL117 plasmid pESBL-117, complete sequence	NA	NA	NA	taxon:562	NA	NA	NA	NA	genomic DNA	Escherichia coli	pESBL-117	ESBL117	NA	NA	NA	NA	NA	NA	NA	NA	NA	NA	NA	NA	NA	NA	NA	NA	NA	NA	NA	NA	NA	NA	NA	NA	NA	NA
435	CP008735.1	circular	96463	Bacteria	Proteobacteria	Gammaproteobacteria	Enterobacterales	Enterobacteriaceae	Escherichia	Escherichia coli	Escherichia coli strain ESBL-12 plasmid pESBL-12, complete sequence	NA	NA	NA	taxon:562	NA	NA	NA	NA	genomic DNA	Escherichia coli	pESBL-12	ESBL-12	NA	NA	NA	NA	NA	NA	NA	NA	NA	NA	NA	NA	NA	NA	NA	NA	NA	NA	NA	NA	NA	NA	NA	NA	NA	NA
436	CP008736.1	circular	110137	Bacteria	Proteobacteria	Gammaproteobacteria	Enterobacterales	Enterobacteriaceae	Escherichia	Escherichia coli	Escherichia coli strain ESBL-283 plasmid pESBL-283, complete sequence	NA	NA	NA	taxon:562	NA	NA	NA	NA	genomic DNA	Escherichia coli	pESBL-283	ESBL-283	NA	NA	NA	NA	NA	NA	NA	NA	NA	NA	NA	NA	NA	NA	NA	NA	NA	NA	NA	NA	NA	NA	NA	NA	NA	NA
437	CP008737.1	circular	107552	Bacteria	Proteobacteria	Gammaproteobacteria	Enterobacterales	Enterobacteriaceae	Escherichia	Escherichia coli	Escherichia coli strain ESBL-305 plasmid pESBL-305, complete sequence	NA	NA	NA	taxon:562	NA	NA	NA	NA	genomic DNA	Escherichia coli	pESBL-305	ESBL-305	NA	NA	NA	NA	NA	NA	NA	NA	NA	NA	NA	NA	NA	NA	NA	NA	NA	NA	NA	NA	NA	NA	NA	NA	NA	NA
438	CP008738.1	circular	93037	Bacteria	Proteobacteria	Gammaproteobacteria	Enterobacterales	Enterobacteriaceae	Escherichia	Escherichia coli	Escherichia coli strain ESBL-315 plasmid pESBL-315, complete sequence	NA	NA	NA	taxon:562	NA	NA	NA	NA	genomic DNA	Escherichia coli	pESBL-315	ESBL-315	NA	NA	NA	NA	NA	NA	NA	NA	NA	NA	NA	NA	NA	NA	NA	NA	NA	NA	NA	NA	NA	NA	NA	NA	NA	NA
439	CP008904.1	circular	38364	Bacteria	Firmicutes	Bacilli	Bacillales	Bacillaceae	Geobacillus	Geobacillus sp. LC300	Geobacillus sp. LC300 plasmid pGt35, complete sequence	NA	NA	NA	taxon:1519377	NA	NA	NA	NA	genomic DNA	Geobacillus sp. LC300	pGt35	LC300	NA	NA	NA	NA	NA	NA	NA	NA	NA	NA	NA	NA	NA	NA	NA	NA	NA	NA	NA	NA	NA	NA	NA	NA	NA	NA
440	CP008937.1	circular	148131	Bacteria	Proteobacteria	Alphaproteobacteria	Holosporales	Caedimonadaceae	Candidatus Paracaedimonas	Candidatus Paracaedimonas acanthamoebae	Candidatus Caedibacter acanthamoebae plasmid Plasmid_00001, complete sequence	NA	2009-09-30	NA	taxon:244581	NA	Acanthamoeba polyphaga HN-3	NA	NA	genomic DNA	Candidatus Paracaedimonas acanthamoebae	Plasmid_00001	NA	NA	NA	NA	30173	NA	NA	NA	NA	NA	NA	NA	NA	NA	NA	NA	NA	NA	NA	NA	NA	NA	NA	NA	NA	NA	NA
441	CP008938.1	circular	71042	Bacteria	Proteobacteria	Alphaproteobacteria	Holosporales	Caedimonadaceae	Candidatus Paracaedimonas	Candidatus Paracaedimonas acanthamoebae	Candidatus Caedibacter acanthamoebae plasmid Plasmid_00002, complete sequence	NA	2009-09-30	NA	taxon:244581	NA	Acanthamoeba polyphaga HN-3	NA	NA	genomic DNA	Candidatus Paracaedimonas acanthamoebae	Plasmid_00002	NA	NA	NA	NA	30173	NA	NA	NA	NA	NA	NA	NA	NA	NA	NA	NA	NA	NA	NA	NA	NA	NA	NA	NA	NA	NA	NA
442	CP008939.1	circular	169123	Bacteria	Proteobacteria	Alphaproteobacteria	Holosporales	Caedimonadaceae	Candidatus Paracaedimonas	Candidatus Paracaedimonas acanthamoebae	Candidatus Caedibacter acanthamoebae plasmid Plasmid_00003, complete sequence	NA	2009-09-30	NA	taxon:244581	NA	Acanthamoeba polyphaga HN-3	NA	NA	genomic DNA	Candidatus Paracaedimonas acanthamoebae	Plasmid_00003	NA	NA	NA	NA	30173	NA	NA	NA	NA	NA	NA	NA	NA	NA	NA	NA	NA	NA	NA	NA	NA	NA	NA	NA	NA	NA	NA
443	CP008940.1	circular	65130	Bacteria	Proteobacteria	Alphaproteobacteria	Holosporales	Caedimonadaceae	Candidatus Paracaedimonas	Candidatus Paracaedimonas acanthamoebae	Candidatus Caedibacter acanthamoebae plasmid Plasmid_00004, complete sequence	NA	2009-09-30	NA	taxon:244581	NA	Acanthamoeba polyphaga HN-3	NA	NA	genomic DNA	Candidatus Paracaedimonas acanthamoebae	Plasmid_00004	NA	NA	NA	NA	30173	NA	NA	NA	NA	NA	NA	NA	NA	NA	NA	NA	NA	NA	NA	NA	NA	NA	NA	NA	NA	NA	NA
444	CP008952.1	linear	25175	Bacteria	Actinobacteria	Actinobacteria	Corynebacteriales	Nocardiaceae	Rhodococcus	Rhodococcus opacus	Rhodococcus opacus strain R7 plasmid pPDG5, complete sequence	Dr. Patrizia Di Gennaro	2001	Italy	taxon:37919	NA	NA	hydrocarbon contaminated soil	NA	genomic DNA	Rhodococcus opacus	pPDG5	R7	NA	NA	NA	NA	NA	NA	CIP:107348	NA	NA	NA	NA	NA	NA	NA	NA	NA	NA	NA	NA	NA	NA	NA	NA	NA	NA	NA
445	CP009051.1	circular	97258	Bacteria	Proteobacteria	Gammaproteobacteria	Enterobacterales	Enterobacteriaceae	Escherichia	Escherichia coli	Escherichia coli NCCP15648 plasmid p15648-1, complete sequence	NA	2001	South Korea	taxon:1200752	NA	NA	stool	NA	genomic DNA	Escherichia coli NCCP15648	p15648-1	NCCP15648	NA	NA	NA	NA	NA	NA	NA	NA	NA	NA	NA	NA	NA	NA	NA	NA	NA	NA	NA	NA	NA	NA	NA	NA	NA	NA
446	CP009052.1	circular	83860	Bacteria	Proteobacteria	Gammaproteobacteria	Enterobacterales	Enterobacteriaceae	Escherichia	Escherichia coli	Escherichia coli NCCP15648 plasmid p15648-2, complete sequence	NA	2001	South Korea	taxon:1200752	NA	NA	stool	NA	genomic DNA	Escherichia coli NCCP15648	p15648-2	NCCP15648	NA	NA	NA	NA	NA	NA	NA	NA	NA	NA	NA	NA	NA	NA	NA	NA	NA	NA	NA	NA	NA	NA	NA	NA	NA	NA
447	CP009053.1	circular	78111	Bacteria	Proteobacteria	Gammaproteobacteria	Enterobacterales	Enterobacteriaceae	Escherichia	Escherichia coli	Escherichia coli NCCP15648 plasmid p15648-3, complete sequence	NA	2001	South Korea	taxon:1200752	NA	NA	stool	NA	genomic DNA	Escherichia coli NCCP15648	p15648-3	NCCP15648	NA	NA	NA	NA	NA	NA	NA	NA	NA	NA	NA	NA	NA	NA	NA	NA	NA	NA	NA	NA	NA	NA	NA	NA	NA	NA
448	CP009154.1	circular	47098	Bacteria	Proteobacteria	Betaproteobacteria	Burkholderiales	Burkholderiaceae	Burkholderia	Burkholderia pseudomallei	Burkholderia pseudomallei strain TSV202 plasmid 2, complete sequence	NA	NA	Australia	taxon:28450	NA	NA	NA	19.2806167 S 147.0308833 E	genomic DNA	Burkholderia pseudomallei	2	TSV202	NA	NA	NA	NA	NA	NA	NA	NA	NA	NA	NA	NA	NA	NA	NA	NA	NA	NA	NA	NA	NA	NA	NA	NA	NA	NA
449	CP009155.1	circular	271168	Bacteria	Proteobacteria	Betaproteobacteria	Burkholderiales	Burkholderiaceae	Burkholderia	Burkholderia pseudomallei	Burkholderia pseudomallei strain TSV202 plasmid 1, complete sequence	NA	NA	Australia	taxon:28450	NA	NA	NA	19.2806167 S 147.0308833 E	genomic DNA	Burkholderia pseudomallei	1	TSV202	NA	NA	NA	NA	NA	NA	NA	NA	NA	NA	NA	NA	NA	NA	NA	NA	NA	NA	NA	NA	NA	NA	NA	NA	NA	NA
450	CP009231.1	circular	155456	Bacteria	Proteobacteria	Gammaproteobacteria	Enterobacterales	Enterobacteriaceae	Escherichia	Escherichia coli	Escherichia coli strain CA14 plasmid pCA14, complete sequence	NA	NA	USA	taxon:562	NA	NA	NA	NA	genomic DNA	Escherichia coli	pCA14	CA14	NA	NA	NA	NA	NA	NA	NA	NA	NA	NA	NA	NA	NA	NA	NA	NA	NA	NA	NA	NA	NA	NA	NA	NA	NA	NA
451	CP009232.1	circular	172280	Bacteria	Proteobacteria	Gammaproteobacteria	Enterobacterales	Enterobacteriaceae	Escherichia	Escherichia coli	Escherichia coli strain CA28 plasmid pCA28, complete sequence	NA	NA	NA	taxon:562	NA	NA	NA	NA	genomic DNA	Escherichia coli	pCA28	CA28	NA	NA	NA	NA	NA	NA	NA	NA	NA	NA	NA	NA	NA	NA	NA	NA	NA	NA	NA	NA	NA	NA	NA	NA	NA	NA
452	CP009233.1	circular	154789	Bacteria	Proteobacteria	Gammaproteobacteria	Enterobacterales	Enterobacteriaceae	Escherichia	Escherichia coli	Escherichia coli strain CA08 plasmid pCA08, complete sequence	NA	NA	NA	taxon:562	NA	NA	NA	NA	genomic DNA	Escherichia coli	pCA08	CA08	NA	NA	NA	NA	NA	NA	NA	NA	NA	NA	NA	NA	NA	NA	NA	NA	NA	NA	NA	NA	NA	NA	NA	NA	NA	NA
453	CP009410.2	circular	132146	Bacteria	Proteobacteria	Gammaproteobacteria	Enterobacterales	Enterobacteriaceae	Salmonella	Salmonella enterica	Salmonella enterica strain CFSAN007405 plasmid pCFSAN007405_01, complete sequence	FDA	2003-06	USA: CA	taxon:28901	NA	NA	Ground Turkey	NA	genomic DNA	Salmonella enterica	pCFSAN007405_01	CFSAN007405	Typhimurium	NA	NA	30034	NA	NA	NA	NA	NA	NA	NA	NA	NA	NA	NA	NA	NA	NA	NA	NA	NA	NA	NA	NA	NA	NA
454	CP009411.2	circular	166496	Bacteria	Proteobacteria	Gammaproteobacteria	Enterobacterales	Enterobacteriaceae	Salmonella	Salmonella enterica	Salmonella enterica strain CFSAN007425 plasmid pCFSAN007425_01, complete sequence	FDA	2002-10	USA: MD	taxon:28901	NA	NA	Ground Turkey	NA	genomic DNA	Salmonella enterica	pCFSAN007425_01	CFSAN007425	Newport	NA	NA	22697	NA	NA	NA	NA	NA	NA	NA	NA	NA	NA	NA	NA	NA	NA	NA	NA	NA	NA	NA	NA	NA	NA
455	CP009412.2	circular	103586	Bacteria	Proteobacteria	Gammaproteobacteria	Enterobacterales	Enterobacteriaceae	Salmonella	Salmonella enterica	Salmonella enterica strain CFSAN007426 plasmid pCFSAN007426_01, complete sequence	FDA	2008-11	USA: CO	taxon:28901	NA	NA	Ground Turkey	NA	genomic DNA	Salmonella enterica	pCFSAN007426_01	CFSAN007426	Agona	NA	NA	N19767	NA	NA	NA	NA	NA	NA	NA	NA	NA	NA	NA	NA	NA	NA	NA	NA	NA	NA	NA	NA	NA	NA
456	CP009413.2	circular	175517	Bacteria	Proteobacteria	Gammaproteobacteria	Enterobacterales	Enterobacteriaceae	Salmonella	Salmonella enterica	Salmonella enterica strain CFSAN007427 plasmid pCFSAN007427_01, complete sequence	FDA	2009-07	USA: NM	taxon:28901	NA	NA	Ground Turkey	NA	genomic DNA	Salmonella enterica	pCFSAN007427_01	CFSAN007427	Infantis	NA	NA	N20272	NA	NA	NA	NA	NA	NA	NA	NA	NA	NA	NA	NA	NA	NA	NA	NA	NA	NA	NA	NA	NA	NA
457	CP009414.2	circular	164924	Bacteria	Proteobacteria	Gammaproteobacteria	Enterobacterales	Enterobacteriaceae	Salmonella	Salmonella enterica	Salmonella enterica strain CFSAN007428 plasmid pCFSAN007428_01, complete sequence	FDA	2006-09	USA: NM	taxon:28901	NA	NA	Chicken breast	NA	genomic DNA	Salmonella enterica	pCFSAN007428_01	CFSAN007428	Kentucky	NA	NA	N11150	NA	NA	NA	NA	NA	NA	NA	NA	NA	NA	NA	NA	NA	NA	NA	NA	NA	NA	NA	NA	NA	NA
458	CP009911.1	circular	27126	Bacteria	Spirochaetes	Spirochaetia	Spirochaetales	Borreliaceae	Borreliella	Borreliella chilensis	Borreliella chilensis strain VA1 plasmid cp26, complete sequence	NA	NA	NA	taxon:1245910	NA	NA	NA	NA	genomic DNA	Borreliella chilensis	cp26	VA1	NA	NA	NA	NA	NA	NA	NA	NA	type strain of Borreliella chilensis	NA	NA	NA	NA	NA	NA	NA	NA	NA	NA	NA	NA	NA	NA	NA	NA	NA
459	CP009912.1	linear	54418	Bacteria	Spirochaetes	Spirochaetia	Spirochaetales	Borreliaceae	Borreliella	Borreliella chilensis	Borreliella chilensis strain VA1 plasmid lp54, complete sequence	NA	NA	NA	taxon:1245910	NA	NA	NA	NA	genomic DNA	Borreliella chilensis	lp54	VA1	NA	NA	NA	NA	NA	NA	NA	NA	type strain of Borreliella chilensis	NA	NA	NA	NA	NA	NA	NA	NA	NA	NA	NA	NA	NA	NA	NA	NA	NA
460	CP010513.1	circular	23128	Bacteria	Proteobacteria	Gammaproteobacteria	Enterobacterales	Enterobacteriaceae	Enterobacter	Enterobacter cloacae	Enterobacter cloacae strain colR/S plasmid, complete sequence	NA	2013	USA: Georgia: Atlanta	taxon:550	NA	Homo sapiens	bronchoalveolar lavage from kidney transplant patient	33.7911 N 84.3233 W	genomic DNA	Enterobacter cloacae	unnamed	colR/S	NA	NA	NA	NA	NA	NA	NA	NA	NA	NA	NA	NA	NA	NA	NA	NA	NA	NA	NA	NA	NA	NA	NA	NA	NA	NA
461	CP010830.1	circular	215551	Bacteria	Proteobacteria	Gammaproteobacteria	Enterobacterales	Enterobacteriaceae	Shigella	Shigella sonnei	Shigella sonnei strain FORC_011 plasmid pFORC11.1, complete sequence	NA	1999-03-20	South Korea	taxon:624	NA	Homo sapiens	Stool	37.53 N 126.96 E	genomic DNA	Shigella sonnei	pFORC11.1	FORC_011	NA	NA	NA	NA	NA	NA	NA	NA	NA	NA	NA	NA	NA	NA	NA	NA	NA	NA	NA	NA	NA	NA	NA	NA	NA	NA
462	CP010831.1	circular	83905	Bacteria	Proteobacteria	Gammaproteobacteria	Enterobacterales	Enterobacteriaceae	Shigella	Shigella sonnei	Shigella sonnei strain FORC_011 plasmid pFORC11.2, complete sequence	NA	1999-03-20	South Korea	taxon:624	NA	Homo sapiens	Stool	37.53 N 126.96 E	genomic DNA	Shigella sonnei	pFORC11.2	FORC_011	NA	NA	NA	NA	NA	NA	NA	NA	NA	NA	NA	NA	NA	NA	NA	NA	NA	NA	NA	NA	NA	NA	NA	NA	NA	NA
463	CP010832.1	circular	8405	Bacteria	Proteobacteria	Gammaproteobacteria	Enterobacterales	Enterobacteriaceae	Shigella	Shigella sonnei	Shigella sonnei strain FORC_011 plasmid pFORC11.3, complete sequence	NA	1999-03-20	South Korea	taxon:624	NA	Homo sapiens	Stool	37.53 N 126.96 E	genomic DNA	Shigella sonnei	pFORC11.3	FORC_011	NA	NA	NA	NA	NA	NA	NA	NA	NA	NA	NA	NA	NA	NA	NA	NA	NA	NA	NA	NA	NA	NA	NA	NA	NA	NA
464	CP011000.1	circular	198992	Bacteria	Proteobacteria	Alphaproteobacteria	Rhizobiales	Rhizobiaceae	Sinorhizobium	Sinorhizobium meliloti	Sinorhizobium meliloti strain USDA1963 plasmid pHRB800, complete sequence	NA	NA	NA	taxon:382	NA	NA	NA	NA	genomic DNA	Sinorhizobium meliloti	pHRB800	USDA1963	NA	NA	NA	NA	NA	NA	NA	NA	NA	NA	NA	NA	NA	NA	NA	NA	NA	NA	NA	NA	NA	NA	NA	NA	NA	NA
465	CP011075.1	circular	733520	Bacteria	Firmicutes	Bacilli	Bacillales	Paenibacillaceae	Brevibacillus	Brevibacillus laterosporus	Brevibacillus laterosporus strain B9 plasmid unnamed1, complete sequence	NA	2012-10-20	China: Zhejiang	taxon:1465	NA	Oryza sativa	soil	28.88 N 105.42 E	genomic DNA	Brevibacillus laterosporus	unnamed1	B9	NA	NA	NA	NA	NA	NA	NA	NA	NA	NA	NA	NA	NA	NA	NA	NA	NA	NA	NA	NA	NA	NA	NA	NA	NA	NA
466	CP011076.1	circular	1376691	Bacteria	Firmicutes	Bacilli	Bacillales	Paenibacillaceae	Brevibacillus	Brevibacillus laterosporus	Brevibacillus laterosporus strain B9 plasmid unnamed2, complete sequence	NA	2012-10-20	China: Zhejiang	taxon:1465	NA	Oryza sativa	soil	28.88 N 105.42 E	genomic DNA	Brevibacillus laterosporus	unnamed2	B9	NA	NA	NA	NA	NA	NA	NA	NA	NA	NA	NA	NA	NA	NA	NA	NA	NA	NA	NA	NA	NA	NA	NA	NA	NA	NA
467	CP011251.1	circular	33022	Bacteria	Proteobacteria	Gammaproteobacteria	Xanthomonadales	Xanthomonadaceae	Xanthomonas	Xanthomonas citri	Xanthomonas fuscans subsp. aurantifolii strain FDC 1561 plasmid pXfb33, complete sequence	NA	1981	Argentina	taxon:76802	NA	Citrus limon	NA	NA	genomic DNA	Xanthomonas citri pv. aurantifolii	pXfb33	FDC 1561	NA	aurantifolii	NA	NA	pathovar: aurantifolii	NA	NA	NA	NA	NA	NA	NA	NA	NA	NA	NA	NA	NA	NA	NA	NA	NA	NA	NA	NA	NA
468	CP011490.1	circular	14857	Bacteria	Firmicutes	Bacilli	Bacillales	Staphylococcaceae	Staphylococcus	Staphylococcus pseudintermedius	Staphylococcus pseudintermedius strain 222 plasmid p222, complete sequence	NA	NA	NA	taxon:283734	NA	NA	NA	NA	genomic DNA	Staphylococcus pseudintermedius	p222	222	NA	NA	NA	NA	NA	NA	NA	NA	NA	NA	NA	NA	NA	NA	NA	NA	NA	NA	NA	NA	NA	NA	NA	NA	NA	NA
469	CP011499.1	linear	37805	Bacteria	Actinobacteria	Actinobacteria	Streptomycetales	Streptomycetaceae	Streptomyces	Streptomyces incarnatus	Streptomyces incarnatus strain NRRL 8089 plasmid unnamed_2, complete sequence	NA	15-May-2015	Japan: Okayama	taxon:665007	NA	NA	soil	NA	genomic DNA	Streptomyces incarnatus	unnamed_2	NRRL 8089	NA	NA	NA	Taxonomy ID: 665007	NA	NA	NRRL:8089	NA	NA	NA	NA	NA	NA	NA	NA	NA	NA	NA	NA	NA	NA	NA	NA	NA	NA	NA
470	CP011500.1	linear	3038	Bacteria	Actinobacteria	Actinobacteria	Streptomycetales	Streptomycetaceae	Streptomyces	Streptomyces incarnatus	Streptomyces incarnatus strain NRRL 8089 plasmid unnamed_3, complete sequence	NA	15-May-2015	Japan: Okayama	taxon:665007	NA	NA	soil	NA	genomic DNA	Streptomyces incarnatus	unnamed_3	NRRL 8089	NA	NA	NA	Taxonomy ID: 665007	NA	NA	NRRL:8089	NA	NA	NA	NA	NA	NA	NA	NA	NA	NA	NA	NA	NA	NA	NA	NA	NA	NA	NA
471	CP011540.1	circular	174066	Bacteria	Proteobacteria	Gammaproteobacteria	Enterobacterales	Enterobacteriaceae	Klebsiella	Klebsiella aerogenes	Klebsiella aerogenes strain G7 plasmid pGPN1, complete sequence	NA	1997	France	taxon:548	NA	Homo sapiens	NA	NA	genomic DNA	Klebsiella aerogenes	pGPN1	G7	NA	NA	NA	NA	NA	NA	NA	NA	NA	NA	NA	NA	NA	NA	NA	NA	NA	NA	NA	NA	NA	NA	NA	NA	NA	NA
472	CP011833.1	circular	32689	Bacteria	Firmicutes	Bacilli	Bacillales	Bacillaceae	Geobacillus	Geobacillus sp. 12AMOR1	Geobacillus sp. 12AMOR1 plasmid pGARCT, complete sequence	NA	2012-07-01	Norway: Troll Wall vent field near the Jan Mayen Island	taxon:1629723	NA	NA	thermophilic sediment	71.29665 N 5.773133 W	genomic DNA	Geobacillus sp. 12AMOR1	pGARCT	12AMOR1	NA	NA	NA	NA	NA	NA	DSM:100439	NA	NA	NA	NA	NA	NA	NA	NA	NA	NA	NA	NA	NA	NA	NA	NA	NA	NA	NA
473	CP011841.1	circular	3372	Bacteria	Proteobacteria	Gammaproteobacteria	Enterobacterales	Enterobacteriaceae	Salmonella	Salmonella enterica	Salmonella enterica subsp. enterica serovar Enteritidis strain OLF-SE2-98984-6 plasmid intermediate, complete sequence	NA	2000	Canada	taxon:149539	NA	NA	NA	NA	genomic DNA	Salmonella enterica subsp. enterica serovar Enteritidis	intermediate	OLF-SE2-98984-6	Enteritidis	enterica	NA	NA	NA	NA	NA	NA	NA	NA	NA	NA	NA	NA	NA	NA	NA	NA	NA	NA	NA	NA	NA	NA	NA	NA
474	CP011842.1	circular	2096	Bacteria	Proteobacteria	Gammaproteobacteria	Enterobacterales	Enterobacteriaceae	Salmonella	Salmonella enterica	Salmonella enterica subsp. enterica serovar Enteritidis strain OLF-SE2-98984-6 plasmid small, complete sequence	NA	2000	Canada	taxon:149539	NA	NA	NA	NA	genomic DNA	Salmonella enterica subsp. enterica serovar Enteritidis	small	OLF-SE2-98984-6	Enteritidis	enterica	NA	NA	NA	NA	NA	NA	NA	NA	NA	NA	NA	NA	NA	NA	NA	NA	NA	NA	NA	NA	NA	NA	NA	NA
475	CP011843.1	circular	59372	Bacteria	Proteobacteria	Gammaproteobacteria	Enterobacterales	Enterobacteriaceae	Salmonella	Salmonella enterica	Salmonella enterica subsp. enterica serovar Enteritidis strain OLF-SE3-98983-4 plasmid virulence, complete sequence	NA	2000	Canada	taxon:149539	NA	NA	NA	NA	genomic DNA	Salmonella enterica subsp. enterica serovar Enteritidis	virulence	OLF-SE3-98983-4	Enteritidis	enterica	NA	NA	NA	NA	NA	NA	NA	NA	NA	NA	NA	NA	NA	NA	NA	NA	NA	NA	NA	NA	NA	NA	NA	NA
476	CP011953.1	circular	6417	Bacteria	Firmicutes	Bacilli	Lactobacillales	Lactobacillaceae	Lactobacillus	Lactobacillus farciminis	Lactobacillus farciminis strain CNCM-I-3699-S plasmid unnamed 1, complete sequence	NA	1997-01-01	France	taxon:1612	NA	Capra hircus	goat rumen	NA	genomic DNA	Lactobacillus farciminis	unnamed 1	CNCM-I-3699-S	NA	NA	NA	NA	NA	NA	NA	NA	NA	NA	NA	NA	NA	NA	NA	NA	NA	NA	NA	NA	NA	NA	NA	NA	NA	NA
477	CP011954.1	circular	35418	Bacteria	Firmicutes	Bacilli	Lactobacillales	Lactobacillaceae	Lactobacillus	Lactobacillus farciminis	Lactobacillus farciminis strain CNCM-I-3699-S plasmid unnamed 2, complete sequence	NA	1997-01-01	France	taxon:1612	NA	Capra hircus	goat rumen	NA	genomic DNA	Lactobacillus farciminis	unnamed 2	CNCM-I-3699-S	NA	NA	NA	NA	NA	NA	NA	NA	NA	NA	NA	NA	NA	NA	NA	NA	NA	NA	NA	NA	NA	NA	NA	NA	NA	NA
478	CP011998.1	circular	2008422	Bacteria	Proteobacteria	Betaproteobacteria	Burkholderiales	Burkholderiaceae	Ralstonia	Ralstonia solanacearum	Ralstonia solanacearum strain YC45 plasmid, complete sequence	NA	2006-07-20	China	taxon:305	NA	ginger	NA	NA	genomic DNA	Ralstonia solanacearum	unnamed	YC45	NA	NA	NA	NA	NA	NA	NA	NA	NA	NA	NA	NA	NA	NA	NA	NA	NA	NA	NA	NA	NA	NA	NA	NA	NA	NA
479	CP011999.1	circular	83399	Bacteria	Proteobacteria	Gammaproteobacteria	Enterobacterales	Enterobacteriaceae	Klebsiella	Klebsiella pneumoniae	Klebsiella pneumoniae strain KLP28 plasmid pKp28, complete sequence	University of Pittsburgh	2012-11-13	USA: Pennsylvania	taxon:573	NA	NA	NA	40.44 N 79.97 W	genomic DNA	Klebsiella pneumoniae	pKp28	KLP28	NA	NA	NA	NA	NA	NA	NA	NA	NA	NA	NA	NA	NA	NA	NA	NA	NA	NA	NA	NA	NA	NA	NA	NA	NA	NA
480	CP012000.1	circular	113626	Bacteria	Proteobacteria	Gammaproteobacteria	Enterobacterales	Enterobacteriaceae	Klebsiella	Klebsiella pneumoniae	Klebsiella pneumoniae strain KLP41 plasmid pKp41, complete sequence	University of Pittsburgh	2011-09-02	USA: Pennsylvania	taxon:573	NA	Homo sapiens	NA	40.44 N 79.97 W	genomic DNA	Klebsiella pneumoniae	pKp41	KLP41	NA	NA	NA	NA	NA	NA	NA	NA	NA	NA	NA	NA	NA	NA	NA	NA	NA	NA	NA	NA	NA	NA	NA	NA	NA	NA
481	CP012113.1	circular	132464	Bacteria	Proteobacteria	Gammaproteobacteria	Enterobacterales	Enterobacteriaceae	Escherichia	Escherichia coli	Escherichia coli strain PSUO78 plasmid pPSUO78_1, complete sequence	Animal Diagnostic Lab, University Park, PA16801, USA	2010	USA	taxon:562	NA	Gallus gallus domesticus	peritoneal cavity	40.79 N 77.86 W	genomic DNA	Escherichia coli	pPSUO78_1	PSUO78	NA	NA	NA	NA	NA	NA	NA	NA	NA	NA	NA	NA	NA	NA	NA	NA	NA	NA	NA	NA	NA	NA	NA	NA	NA	NA
482	CP012114.1	circular	109613	Bacteria	Proteobacteria	Gammaproteobacteria	Enterobacterales	Enterobacteriaceae	Escherichia	Escherichia coli	Escherichia coli strain PSUO78 plasmid pPSUO78_2, complete sequence	Animal Diagnostic Lab, University Park, PA16801, USA	2010	USA	taxon:562	NA	Gallus gallus domesticus	peritoneal cavity	40.79 N 77.86 W	genomic DNA	Escherichia coli	pPSUO78_2	PSUO78	NA	NA	NA	NA	NA	NA	NA	NA	NA	NA	NA	NA	NA	NA	NA	NA	NA	NA	NA	NA	NA	NA	NA	NA	NA	NA
483	CP012118.2	circular	27043	Bacteria	Firmicutes	Bacilli	Bacillales	Staphylococcaceae	Staphylococcus	Staphylococcus aureus	Staphylococcus aureus subsp. aureus strain USA300_2014.C01 plasmid pC01, complete sequence	NA	2011	USA: Georgia	taxon:46170	NA	Homo sapiens	Purulent abscess	32.3661 N 84.9692 W	genomic DNA	Staphylococcus aureus subsp. aureus	pC01	USA300_2014.C01	NA	aureus	NA	NA	NA	NA	NA	NA	NA	NA	NA	NA	NA	NA	NA	NA	NA	NA	NA	NA	NA	NA	NA	NA	NA	NA
484	CP012138.1	circular	144188	Bacteria	Proteobacteria	Gammaproteobacteria	Enterobacterales	Enterobacteriaceae	Shigella	Shigella flexneri	Shigella flexneri 2a strain 981 plasmid 981p1, complete sequence	NA	1998	China	taxon:42897	NA	Homo sapiens	NA	NA	genomic DNA	Shigella flexneri 2a	981p1	981	NA	NA	NA	NA	NA	NA	NA	NA	NA	NA	NA	NA	NA	NA	NA	NA	NA	NA	NA	NA	NA	NA	NA	NA	NA	NA
485	CP012139.1	circular	86407	Bacteria	Proteobacteria	Gammaproteobacteria	Enterobacterales	Enterobacteriaceae	Shigella	Shigella flexneri	Shigella flexneri 2a strain 981 plasmid 981p2, complete sequence	NA	1998	China	taxon:42897	NA	Homo sapiens	NA	NA	genomic DNA	Shigella flexneri 2a	981p2	981	NA	NA	NA	NA	NA	NA	NA	NA	NA	NA	NA	NA	NA	NA	NA	NA	NA	NA	NA	NA	NA	NA	NA	NA	NA	NA
486	CP012141.1	circular	248368	Bacteria	Proteobacteria	Gammaproteobacteria	Enterobacterales	Enterobacteriaceae	Shigella	Shigella flexneri	Shigella flexneri 4c strain 1205 plasmid 1205p1, complete sequence	NA	NA	NA	taxon:1617964	NA	NA	NA	NA	genomic DNA	Shigella flexneri 4c	1205p1	1205	NA	NA	NA	NA	NA	NA	NA	NA	NA	NA	NA	NA	NA	NA	NA	NA	NA	NA	NA	NA	NA	NA	NA	NA	NA	NA
487	CP012142.1	circular	222060	Bacteria	Proteobacteria	Gammaproteobacteria	Enterobacterales	Enterobacteriaceae	Shigella	Shigella flexneri	Shigella flexneri 4c strain 1205 plasmid 1205p2, complete sequence	NA	NA	NA	taxon:1617964	NA	NA	NA	NA	genomic DNA	Shigella flexneri 4c	1205p2	1205	NA	NA	NA	NA	NA	NA	NA	NA	NA	NA	NA	NA	NA	NA	NA	NA	NA	NA	NA	NA	NA	NA	NA	NA	NA	NA
488	CP012143.1	circular	42002	Bacteria	Proteobacteria	Gammaproteobacteria	Enterobacterales	Enterobacteriaceae	Shigella	Shigella flexneri	Shigella flexneri 4c strain 1205 plasmid 1205p3, complete sequence	NA	NA	NA	taxon:1617964	NA	NA	NA	NA	genomic DNA	Shigella flexneri 4c	1205p3	1205	NA	NA	NA	NA	NA	NA	NA	NA	NA	NA	NA	NA	NA	NA	NA	NA	NA	NA	NA	NA	NA	NA	NA	NA	NA	NA
489	CP012178.1	circular	6462	Bacteria	Firmicutes	Bacilli	Lactobacillales	Lactobacillaceae	Lactobacillus	Lactobacillus farciminis	Lactobacillus farciminis strain CNCM-I-3699-R plasmid, complete sequence	NA	1997-01-01	France	taxon:1612	NA	Capra hircus	rumen	NA	genomic DNA	Lactobacillus farciminis	unnamed	CNCM-I-3699-R	NA	NA	NA	NA	NA	NA	NA	NA	NA	NA	NA	NA	NA	NA	NA	NA	NA	NA	NA	NA	NA	NA	NA	NA	NA	NA
490	CP012197.1	circular	185134	Bacteria	Proteobacteria	Gammaproteobacteria	Enterobacterales	Enterobacteriaceae	Escherichia	Escherichia coli	Escherichia coli strain ECwhn14 plasmid pECwhn14, complete sequence	Hong-Ning Wang	2014-10-18	China: Hebei	taxon:562	NA	NA	Chicken	38.52 N 115.31 E	genomic DNA	Escherichia coli	pECwhn14	ECwhn14	NA	NA	NA	NA	genotype: ST167	NA	NA	NA	NA	NA	NA	NA	NA	NA	NA	NA	NA	NA	NA	NA	NA	NA	NA	NA	NA	NA
491	CP012198.1	circular	8401	Bacteria	Proteobacteria	Gammaproteobacteria	Enterobacterales	Enterobacteriaceae	Escherichia	Escherichia coli	Escherichia coli strain ECwhn14 plasmid p8401, complete sequence	Hong-Ning Wang	2014-10-18	China: Hebei	taxon:562	NA	NA	Chicken	38.52 N 115.31 E	genomic DNA	Escherichia coli	p8401	ECwhn14	NA	NA	NA	NA	genotype: ST167	NA	NA	NA	NA	NA	NA	NA	NA	NA	NA	NA	NA	NA	NA	NA	NA	NA	NA	NA	NA	NA
492	CP012377.1	circular	125121	Bacteria	Proteobacteria	Gammaproteobacteria	Enterobacterales	Enterobacteriaceae	Escherichia	Escherichia coli	Escherichia coli strain GE3 plasmid pGE3, complete sequence	NA	NA	China	taxon:562	NA	NA	human faeces of different individuals	NA	genomic DNA	Escherichia coli	pGE3	GE3	NA	NA	NA	human faeces	NA	NA	NA	NA	NA	NA	NA	NA	NA	NA	NA	NA	NA	NA	NA	NA	NA	NA	NA	NA	NA	NA
493	CP012477.1	circular	754192	Bacteria	Actinobacteria	Actinobacteria	Micrococcales	Micrococcaceae	Arthrobacter	Arthrobacter sp. ERGS1:01	Arthrobacter sp. ERGS1:01 plasmid unnamed2, complete sequence	NA	NA	NA	taxon:1704044	NA	NA	NA	NA	genomic DNA	Arthrobacter sp. ERGS1:01	unnamed2	ERGS1:01	NA	NA	NA	NA	NA	NA	NA	NA	NA	NA	NA	NA	NA	NA	NA	NA	NA	NA	NA	NA	NA	NA	NA	NA	NA	NA
494	CP012494.1	circular	96228	Bacteria	Proteobacteria	Gammaproteobacteria	Enterobacterales	Enterobacteriaceae	Escherichia	Escherichia coli	Escherichia coli strain CFSAN004177 plasmid pCFSAN004177G_03, complete sequence	CDC	2004	USA	taxon:562	NA	Homo sapiens	NA	NA	genomic DNA	Escherichia coli	pCFSAN004177G_03	CFSAN004177	NA	NA	NA	NA	05-3014; serogroup: O145	NA	NA	NA	NA	NA	NA	NA	NA	NA	NA	NA	NA	NA	NA	NA	NA	NA	NA	NA	NA	NA
495	CP012495.1	circular	52297	Bacteria	Proteobacteria	Gammaproteobacteria	Enterobacterales	Enterobacteriaceae	Escherichia	Escherichia coli	Escherichia coli strain CFSAN004177 plasmid pCFSAN004177P_02, complete sequence	CDC	2004	USA	taxon:562	NA	Homo sapiens	NA	NA	genomic DNA	Escherichia coli	pCFSAN004177P_02	CFSAN004177	NA	NA	NA	NA	05-3014; serogroup: O145	NA	NA	NA	NA	NA	NA	NA	NA	NA	NA	NA	NA	NA	NA	NA	NA	NA	NA	NA	NA	NA
496	CP012496.1	circular	34714	Bacteria	Proteobacteria	Gammaproteobacteria	Enterobacterales	Enterobacteriaceae	Escherichia	Escherichia coli	Escherichia coli strain CFSAN004177 plasmid pCFSAN004177P_01, complete sequence	CDC	2004	USA	taxon:562	NA	Homo sapiens	NA	NA	genomic DNA	Escherichia coli	pCFSAN004177P_01	CFSAN004177	NA	NA	NA	NA	05-3014; serogroup: O145	NA	NA	NA	NA	NA	NA	NA	NA	NA	NA	NA	NA	NA	NA	NA	NA	NA	NA	NA	NA	NA
497	CP012732.1	circular	25194	Bacteria	Proteobacteria	Gammaproteobacteria	Enterobacterales	Enterobacteriaceae	Shigella	Shigella flexneri	Shigella flexneri 1a strain 0228 plasmid, complete sequence	NA	2002	China	taxon:374923	NA	Homo sapiens	NA	NA	genomic DNA	Shigella flexneri 1a	unnamed	228	NA	NA	NA	NA	NA	NA	NA	NA	NA	NA	NA	NA	NA	NA	NA	NA	NA	NA	NA	NA	NA	NA	NA	NA	NA	NA
498	CP012733.1	circular	41686	Bacteria	Proteobacteria	Gammaproteobacteria	Enterobacterales	Enterobacteriaceae	Shigella	Shigella flexneri	Shigella flexneri 1a strain 0228 plasmid, complete sequence	NA	2002	China	taxon:374923	NA	Homo sapiens	NA	NA	genomic DNA	Shigella flexneri 1a	unnamed	228	NA	NA	NA	NA	NA	NA	NA	NA	NA	NA	NA	NA	NA	NA	NA	NA	NA	NA	NA	NA	NA	NA	NA	NA	NA	NA
499	CP012734.1	circular	63412	Bacteria	Proteobacteria	Gammaproteobacteria	Enterobacterales	Enterobacteriaceae	Shigella	Shigella flexneri	Shigella flexneri 1a strain 0228 plasmid, complete sequence	NA	2002	China	taxon:374923	NA	Homo sapiens	NA	NA	genomic DNA	Shigella flexneri 1a	unnamed	228	NA	NA	NA	NA	NA	NA	NA	NA	NA	NA	NA	NA	NA	NA	NA	NA	NA	NA	NA	NA	NA	NA	NA	NA	NA	NA
500	CP012736.1	circular	24419	Bacteria	Proteobacteria	Gammaproteobacteria	Enterobacterales	Enterobacteriaceae	Shigella	Shigella flexneri	Shigella flexneri 1a strain 0228 plasmid, complete sequence	NA	2002	China	taxon:374923	NA	Homo sapiens	NA	NA	genomic DNA	Shigella flexneri 1a	unnamed	228	NA	NA	NA	NA	NA	NA	NA	NA	NA	NA	NA	NA	NA	NA	NA	NA	NA	NA	NA	NA	NA	NA	NA	NA	NA	NA
501	CP012848.1	circular	5651	Bacteria	Proteobacteria	Gammaproteobacteria	Enterobacterales	Enterobacteriaceae	Candidatus Riesia	Candidatus Riesia sp. GBBU	Candidatus Riesia sp. GBBU plasmid, complete sequence	NA	NA	Uganda	taxon:1719125	NA	Pthirus gorillae	Kenya	NA	genomic DNA	Candidatus Riesia sp. GBBU	unnamed	GBBU	NA	NA	NA	NA	NA	NA	NA	NA	NA	NA	NA	NA	NA	NA	NA	NA	NA	NA	NA	NA	NA	NA	NA	NA	NA	NA
502	CP012902.1	circular	176048	Bacteria	Proteobacteria	Gammaproteobacteria	Enterobacterales	Enterobacteriaceae	Escherichia	Escherichia coli	Escherichia coli strain N15-01078 plasmid pNDM15-1078, complete sequence	NA	2015	Canada	taxon:562	NA	NA	NA	NA	genomic DNA	Escherichia coli	pNDM15-1078	N15-01078	NA	NA	NA	NA	NA	NA	NA	NA	NA	NA	NA	NA	NA	NA	NA	NA	NA	NA	NA	NA	NA	NA	NA	NA	NA	NA
503	CP012903.1	circular	117812	Bacteria	Proteobacteria	Gammaproteobacteria	Enterobacterales	Morganellaceae	Providencia	Providencia rettgeri	Providencia rettgeri strain N15-01091 plasmid pNDM15-1091, complete sequence	NA	2015	Canada	taxon:587	NA	Homo sapiens	NA	NA	genomic DNA	Providencia rettgeri	pNDM15-1091	N15-01091	NA	NA	NA	NA	NA	NA	NA	NA	NA	NA	NA	NA	NA	NA	NA	NA	NA	NA	NA	NA	NA	NA	NA	NA	NA	NA
504	CP012904.1	circular	12294	Bacteria	Proteobacteria	Gammaproteobacteria	Enterobacterales	Morganellaceae	Providencia	Providencia rettgeri	Providencia rettgeri strain N15-01091 plasmid pOXA181-15-1091, complete sequence	NA	2015	Canada	taxon:587	NA	Homo sapiens	NA	NA	genomic DNA	Providencia rettgeri	pOXA181-15-1091	N15-01091	NA	NA	NA	NA	NA	NA	NA	NA	NA	NA	NA	NA	NA	NA	NA	NA	NA	NA	NA	NA	NA	NA	NA	NA	NA	NA
505	CP012955.1	circular	9276	Bacteria	Proteobacteria	Gammaproteobacteria	Pseudomonadales	Moraxellaceae	Acinetobacter	Acinetobacter baumannii	Acinetobacter baumannii strain D36 plasmid pD36-3, complete sequence	Clarence Fernandez	2008	Australia: Sydney	taxon:470	NA	Homo sapiens	Wound	33.8650 S 151.2094 E	genomic DNA	Acinetobacter baumannii	pD36-3	D36	NA	NA	NA	NA	genotype: GC1	NA	NA	NA	NA	GC1	NA	NA	NA	NA	NA	NA	NA	NA	NA	NA	NA	NA	NA	NA	NA	NA
506	CP012956.1	circular	47457	Bacteria	Proteobacteria	Gammaproteobacteria	Pseudomonadales	Moraxellaceae	Acinetobacter	Acinetobacter baumannii	Acinetobacter baumannii strain D36 plasmid pD36-4, complete sequence	Clarence Fernandez	NA	Australia: Sydney	taxon:470	NA	Homo sapiens	NA	33.8650 S 151.2094 E	genomic DNA	Acinetobacter baumannii	pD36-4	D36	NA	NA	NA	NA	genotype: GC1	NA	NA	NA	NA	GC1	NA	NA	NA	NA	NA	NA	NA	NA	NA	NA	NA	NA	NA	NA	NA	NA
507	CP013001.1	circular	393620	Bacteria	Firmicutes	Bacilli	Bacillales	Bacillaceae	Bacillus	Bacillus thuringiensis	Bacillus thuringiensis strain XL6 plasmid, complete sequence	NA	2006-10-01	China: Inner Mongolia	taxon:1428	NA	NA	soil sample	NA	genomic DNA	Bacillus thuringiensis	unnamed	XL6	NA	NA	NA	NA	NA	NA	NA	NA	NA	NA	NA	NA	NA	NA	NA	NA	NA	NA	NA	NA	NA	NA	NA	NA	NA	NA
508	CP013100.1	circular	106908	Bacteria	Proteobacteria	Gammaproteobacteria	Chromatiales	Chromatiaceae	Candidatus Tenderia	Candidatus Tenderia electrophaga	Candidatus Tenderia electrophaga isolate NRL1 plasmid unnamed, complete sequence	NA	2015-08-16	USA: Washington D.C.	taxon:1748243	NA	NA	Biocathode MCL	NA	genomic DNA	Candidatus Tenderia electrophaga	unnamed	NA	NA	NA	NA	NRL1	metagenomic	NA	NA	NA	NA	NA	NA	NA	NA	NA		NA	NA	NA	NA	NA	NA	NA	NA	NA	NA	NA
509	CP013115.1	circular	268412	Bacteria	Proteobacteria	Gammaproteobacteria	Alteromonadales	Shewanellaceae	Shewanella	Shewanella xiamenensis	Shewanella xiamenensis strain T17 plasmid pSx1, complete sequence	NA	2012	Algeria: Tizi Ouzou	taxon:332186	NA	NA	Hospital effluents	36.71 N 4.039999999999964 E	genomic DNA	Shewanella xiamenensis	pSx1	T17	NA	NA	NA	NA	NA	NA	NA	NA	NA	NA	NA	NA	NA	NA	NA	NA	NA	NA	NA	NA	NA	NA	NA	NA	NA	NA
510	CP013201.1	circular	11169	Bacteria	Actinobacteria	Actinobacteria	Micrococcales	Micrococcaceae	Arthrobacter	Arthrobacter alpinus	Arthrobacter alpinus strain ERGS4:06 plasmid pRK01, complete sequence	Rakshak Kumar	15-May-2014	India: East Rathong Glacier, Sikkim	taxon:656366	NA	NA	glacial stream water	27.33 N 88.06999999999994 E	genomic DNA	Arthrobacter alpinus	pRK01	ERGS4:06	NA	NA	NA	NA	NA	NA	NA	NA	NA	NA	4700 m	NA	NA	NA	NA	NA	NA	NA	NA	NA	NA	NA	NA	NA	NA	NA
511	CP013204.1	circular	115513	Bacteria	Firmicutes	Bacilli	Bacillales	Paenibacillaceae	Paenibacillus	Paenibacillus sp. IHB B 3084	Paenibacillus sp. IHB B 3084 plasmid pHD01, complete sequence	Dr. Arvind Gulati	2007-06-10	India:Gete, Lahaul & Spiti	taxon:867076	NA	NA	Lake sediment	32.18 N 78.00999999999999 E	genomic DNA	Paenibacillus sp. IHB B 3084	pHD01	IHB B 3084	NA	NA	NA	NA	NA	Dr. Arvind Gulati	NA	NA	NA	NA	4385 m	NA	NA	NA	NA	NA	NA	NA	NA	NA	NA	NA	NA	NA	NA	NA
512	CP013205.1	circular	100758	Bacteria	Firmicutes	Bacilli	Bacillales	Paenibacillaceae	Paenibacillus	Paenibacillus sp. IHB B 3084	Paenibacillus sp. IHB B 3084 plasmid pHD02, complete sequence	Dr. Arvind Gulati	2007-06-10	India:Gete, Lahaul & Spiti	taxon:867076	NA	NA	Lake sediment	32.18 N 78.00999999999999 E	genomic DNA	Paenibacillus sp. IHB B 3084	pHD02	IHB B 3084	NA	NA	NA	NA	NA	Dr. Arvind Gulati	NA	NA	NA	NA	4385 m	NA	NA	NA	NA	NA	NA	NA	NA	NA	NA	NA	NA	NA	NA	NA
513	CP013206.1	circular	61492	Bacteria	Firmicutes	Bacilli	Bacillales	Paenibacillaceae	Paenibacillus	Paenibacillus sp. IHB B 3084	Paenibacillus sp. IHB B 3084 plasmid pHD03, complete sequence	Dr. Arvind Gulati	2007-06-10	India:Gete, Lahaul & Spiti	taxon:867076	NA	NA	Lake sediment	32.18 N 78.00999999999999 E	genomic DNA	Paenibacillus sp. IHB B 3084	pHD03	IHB B 3084	NA	NA	NA	NA	NA	Dr. Arvind Gulati	NA	NA	NA	NA	4385 m	NA	NA	NA	NA	NA	NA	NA	NA	NA	NA	NA	NA	NA	NA	NA
514	CP013207.1	circular	55914	Bacteria	Firmicutes	Bacilli	Bacillales	Paenibacillaceae	Paenibacillus	Paenibacillus sp. IHB B 3084	Paenibacillus sp. IHB B 3084 plasmid pHD04, complete sequence	Dr. Arvind Gulati	2007-06-10	India:Gete, Lahaul & Spiti	taxon:867076	NA	NA	Lake sediment	32.18 N 78.00999999999999 E	genomic DNA	Paenibacillus sp. IHB B 3084	pHD04	IHB B 3084	NA	NA	NA	NA	NA	Dr. Arvind Gulati	NA	NA	NA	NA	4385 m	NA	NA	NA	NA	NA	NA	NA	NA	NA	NA	NA	NA	NA	NA	NA
515	CP013208.1	circular	39609	Bacteria	Firmicutes	Bacilli	Bacillales	Paenibacillaceae	Paenibacillus	Paenibacillus sp. IHB B 3084	Paenibacillus sp. IHB B 3084 plasmid pHD05, complete sequence	Dr. Arvind Gulati	2007-06-10	India:Gete, Lahaul & Spiti	taxon:867076	NA	NA	Lake sediment	32.18 N 78.00999999999999 E	genomic DNA	Paenibacillus sp. IHB B 3084	pHD05	IHB B 3084	NA	NA	NA	NA	NA	Dr. Arvind Gulati	NA	NA	NA	NA	4385 m	NA	NA	NA	NA	NA	NA	NA	NA	NA	NA	NA	NA	NA	NA	NA
516	CP013209.1	circular	2943	Bacteria	Firmicutes	Bacilli	Bacillales	Paenibacillaceae	Paenibacillus	Paenibacillus sp. IHB B 3084	Paenibacillus sp. IHB B 3084 plasmid pHD06, complete sequence	Dr. Arvind Gulati	2007-06-10	India:Gete, Lahaul & Spiti	taxon:867076	NA	NA	Lake sediment	32.18 N 78.00999999999999 E	genomic DNA	Paenibacillus sp. IHB B 3084	pHD06	IHB B 3084	NA	NA	NA	NA	NA	Dr. Arvind Gulati	NA	NA	NA	NA	4385 m	NA	NA	NA	NA	NA	NA	NA	NA	NA	NA	NA	NA	NA	NA	NA
517	CP013215.1	circular	284628	Bacteria	Proteobacteria	Gammaproteobacteria	Enterobacterales	Enterobacteriaceae	Klebsiella	Klebsiella pneumoniae	Klebsiella pneumoniae subsp. pneumoniae strain H11 plasmid pH11, complete sequence	Laboratory Medicine, Peking University Peoples Hospital	2010-07-08	China:Beijing	taxon:72407	NA	Homo sapiens	separated from patients sputum	39.56 N 116.20 E	genomic DNA	Klebsiella pneumoniae subsp. pneumoniae	pH11	H11	NA	pneumoniae	NA	NA	NA	NA	NA	NA	NA	NA	NA	NA	NA	NA	NA	NA	NA	NA	NA	NA	NA	NA	NA	NA	NA	NA
518	CP013276.2	circular	359560	Bacteria	Firmicutes	Bacilli	Bacillales	Bacillaceae	Bacillus	Bacillus thuringiensis	Bacillus thuringiensis serovar israelensis strain AM65-52 plasmid pAM65-52-1-360K, complete sequence	Alexei Sorokin	2014-06-20	France	taxon:1430	NA	NA	NA	NA	genomic DNA	Bacillus thuringiensis serovar israelensis	pAM65-52-1-360K	AM65-52	israelensis	NA	NA	NA	NA	Alexei Sorokin	NA	NA	NA	NA	100 m	NA	NA	NA	NA	NA	NA	NA	NA	NA	NA	NA	NA	NA	NA	NA
519	CP013277.1	circular	349600	Bacteria	Firmicutes	Bacilli	Bacillales	Bacillaceae	Bacillus	Bacillus thuringiensis	Bacillus thuringiensis serovar israelensis strain AM65-52 plasmid pAM65-52-2-350K, complete sequence	Alexei Sorokin	2014-06-20	France	taxon:1430	NA	NA	NA	NA	genomic DNA	Bacillus thuringiensis serovar israelensis	pAM65-52-2-350K	AM65-52	israelensis	NA	NA	NA	complete	Alexei Sorokin	NA	NA	NA	NA	100 m	NA	NA	NA	NA	NA	NA	NA	NA	NA	NA	NA	NA	NA	NA	NA
520	CP013278.1	circular	235424	Bacteria	Firmicutes	Bacilli	Bacillales	Bacillaceae	Bacillus	Bacillus thuringiensis	Bacillus thuringiensis serovar israelensis strain AM65-52 plasmid pAM65-52-3-235K, complete sequence	Alexei Sorokin	2014-06-20	France	taxon:1430	NA	NA	NA	NA	genomic DNA	Bacillus thuringiensis serovar israelensis	pAM65-52-3-235K	AM65-52	israelensis	NA	NA	NA	complete	Alexei Sorokin	NA	NA	NA	NA	100 m	NA	NA	NA	NA	NA	NA	NA	NA	NA	NA	NA	NA	NA	NA	NA
521	CP013279.1	circular	127938	Bacteria	Firmicutes	Bacilli	Bacillales	Bacillaceae	Bacillus	Bacillus thuringiensis	Bacillus thuringiensis serovar israelensis strain AM65-52 plasmid pAM65-52-4-128K, complete sequence	Alexei Sorokin	2014-06-20	France	taxon:1430	NA	NA	NA	NA	genomic DNA	Bacillus thuringiensis serovar israelensis	pAM65-52-4-128K	AM65-52	israelensis	NA	NA	NA	complete	Alexei Sorokin	NA	NA	NA	NA	100 m	NA	NA	NA	NA	NA	NA	NA	NA	NA	NA	NA	NA	NA	NA	NA
522	CP013280.1	circular	99993	Bacteria	Firmicutes	Bacilli	Bacillales	Bacillaceae	Bacillus	Bacillus thuringiensis	Bacillus thuringiensis serovar israelensis strain AM65-52 plasmid pAM65-52-5-100K, complete sequence	Alexei Sorokin	2014-06-20	France	taxon:1430	NA	NA	NA	NA	genomic DNA	Bacillus thuringiensis serovar israelensis	pAM65-52-5-100K	AM65-52	israelensis	NA	NA	NA	complete	Alexei Sorokin	NA	NA	NA	NA	100 m	NA	NA	NA	NA	NA	NA	NA	NA	NA	NA	NA	NA	NA	NA	NA
523	CP013281.1	circular	16147	Bacteria	Firmicutes	Bacilli	Bacillales	Bacillaceae	Bacillus	Bacillus thuringiensis	Bacillus thuringiensis serovar israelensis strain AM65-52 plasmid pAM65-52-6-16K, complete sequence	Alexei Sorokin	2014-06-20	France	taxon:1430	NA	NA	NA	NA	genomic DNA	Bacillus thuringiensis serovar israelensis	pAM65-52-6-16K	AM65-52	israelensis	NA	NA	NA	complete	Alexei Sorokin	NA	NA	NA	NA	100 m	NA	NA	NA	NA	NA	NA	NA	NA	NA	NA	NA	NA	NA	NA	NA
524	CP013284.1	circular	4830	Bacteria	Firmicutes	Bacilli	Bacillales	Bacillaceae	Bacillus	Bacillus thuringiensis	Bacillus thuringiensis serovar israelensis strain AM65-52 plasmid pAM65-52-9-5K, complete sequence	Alexei Sorokin	2014-06-20	France	taxon:1430	NA	NA	NA	NA	genomic DNA	Bacillus thuringiensis serovar israelensis	pAM65-52-9-5K	AM65-52	israelensis	NA	NA	NA	complete	Alexei Sorokin	NA	NA	NA	NA	100 m	NA	NA	NA	NA	NA	NA	NA	NA	NA	NA	NA	NA	NA	NA	NA
525	CP013295.1	circular	196981	Bacteria	Firmicutes	Clostridia	Clostridiales	Clostridiaceae	Clostridium	Clostridium botulinum	Clostridium botulinum strain CDC_54064 plasmid pNPD1_1, complete sequence	NA	NA	NA	taxon:1491	NA	NA	NA	NA	genomic DNA	Clostridium botulinum	pNPD1_1	CDC_54064	NA	NA	NA	NA	Botulism neurotoxin serotype A genotype A3	NA	NA	NA	NA	NA	NA	NA	NA	NA	NA	NA	NA	NA	NA	NA	NA	NA	NA	NA	NA	NA
526	CP013329.1	circular	6510	Bacteria	Fusobacteria	Fusobacteriia	Fusobacteriales	Fusobacteriaceae	Fusobacterium	Fusobacterium nucleatum	Fusobacterium nucleatum subsp. polymorphum strain ChDC F319 plasmid unnamed1, complete sequence	NA	2005-03-01	South Korea: Gwangju	taxon:76857	NA	Homo sapiens	subgingival dental plaque	36.09 N 128.05 E	genomic DNA	Fusobacterium nucleatum subsp. polymorphum	unnamed1	ChDC F319	NA	polymorphum	NA	NA	NA	NA	KCOM:1281	NA	NA	NA	NA	NA	NA	NA	NA	NA	NA	NA	NA	NA	NA	NA	NA	NA	NA	NA
527	CP013330.1	circular	5079	Bacteria	Fusobacteria	Fusobacteriia	Fusobacteriales	Fusobacteriaceae	Fusobacterium	Fusobacterium nucleatum	Fusobacterium nucleatum subsp. polymorphum strain ChDC F319 plasmid unnamed2, complete sequence	NA	2005-03-01	South Korea: Gwangju	taxon:76857	NA	Homo sapiens	subgingival dental plaque	36.09 N 128.05 E	genomic DNA	Fusobacterium nucleatum subsp. polymorphum	unnamed2	ChDC F319	NA	polymorphum	NA	NA	NA	NA	KCOM:1281	NA	NA	NA	NA	NA	NA	NA	NA	NA	NA	NA	NA	NA	NA	NA	NA	NA	NA	NA
528	CP013471.1	circular	24736	Bacteria	Proteobacteria	Alphaproteobacteria	Rhodospirillales	Acetobacteraceae	Acetobacter	Acetobacter pasteurianus	Acetobacter pasteurianus strain Ab3 plasmid ApAb3p3, complete sequence	NA	2013-01-01	China:Huzhou	taxon:438	NA	NA	vinegar factory	NA	genomic DNA	Acetobacter pasteurianus	ApAb3p3	Ab3	NA	NA	NA	NA	NA	NA	CCTCC:M2013116	NA	NA	NA	NA	NA	NA	NA	NA	NA	NA	NA	NA	NA	NA	NA	NA	NA	NA	NA
529	CP013473.1	circular	2616	Bacteria	Proteobacteria	Alphaproteobacteria	Rhodospirillales	Acetobacteraceae	Acetobacter	Acetobacter pasteurianus	Acetobacter pasteurianus strain Ab3 plasmid ApAb3p5, complete sequence	NA	2013-01-01	China:Huzhou	taxon:438	NA	NA	vinegar factory	NA	genomic DNA	Acetobacter pasteurianus	ApAb3p5	Ab3	NA	NA	NA	NA	NA	NA	CCTCC:M2013116	NA	NA	NA	NA	NA	NA	NA	NA	NA	NA	NA	NA	NA	NA	NA	NA	NA	NA	NA
530	CP013474.1	circular	2046	Bacteria	Proteobacteria	Alphaproteobacteria	Rhodospirillales	Acetobacteraceae	Acetobacter	Acetobacter pasteurianus	Acetobacter pasteurianus strain Ab3 plasmid ApAb3p6, complete sequence	NA	2013-01-01	China:Huzhou	taxon:438	NA	NA	vinegar factory	NA	genomic DNA	Acetobacter pasteurianus	ApAb3p6	Ab3	NA	NA	NA	NA	NA	NA	CCTCC:M2013116	NA	NA	NA	NA	NA	NA	NA	NA	NA	NA	NA	NA	NA	NA	NA	NA	NA	NA	NA
531	CP013622.1	circular	4447	Bacteria	Firmicutes	Bacilli	Bacillales	Staphylococcaceae	Staphylococcus	Staphylococcus aureus	Staphylococcus aureus strain RIVM0677 plasmid pRIVM0677, complete sequence	Dutch National Institute for Public Health and the Environment (RIVM)	20-Feb-2008	Netherlands: Bilthoven	taxon:1280	NA	Homo sapiens	NA	52.13 N 5.210 E	genomic DNA	Staphylococcus aureus	pRIVM0677	RIVM0677	NA	NA	NA	NA	NA	NA	NA	NA	NA	NA	NA	NA	NA	NA	NA	NA	NA	NA	NA	NA	NA	NA	NA	NA	NA	NA
532	CP013623.1	circular	4397	Bacteria	Firmicutes	Bacilli	Bacillales	Staphylococcaceae	Staphylococcus	Staphylococcus aureus	Staphylococcus aureus strain RIVM4390 plasmid pRIVM4390, complete sequence	Dutch National Institute for Public Health and the Environment (RIVM)	2009-10-16	Netherlands: Bilthoven	taxon:1280	NA	Homo sapiens	NA	52.13 N 5.210 E	genomic DNA	Staphylococcus aureus	pRIVM4390	RIVM4390	NA	NA	NA	NA	NA	NA	NA	NA	NA	NA	NA	NA	NA	NA	NA	NA	NA	NA	NA	NA	NA	NA	NA	NA	NA	NA
533	CP013624.1	circular	2216	Bacteria	Firmicutes	Bacilli	Bacillales	Staphylococcaceae	Staphylococcus	Staphylococcus aureus	Staphylococcus aureus strain RIVM1076 plasmid pRIVM1076, complete sequence	Dutch National Institute for Public Health and the Environment (RIVM)	2009-03-10	Netherlands: Bilthoven	taxon:1280	NA	Homo sapiens	NA	52.13 N 5.210 E	genomic DNA	Staphylococcus aureus	pRIVM1076	RIVM1076	NA	NA	NA	NA	NA	NA	NA	NA	NA	NA	NA	NA	NA	NA	NA	NA	NA	NA	NA	NA	NA	NA	NA	NA	NA	NA
534	CP013625.1	circular	3113	Bacteria	Firmicutes	Bacilli	Bacillales	Staphylococcaceae	Staphylococcus	Staphylococcus aureus	Staphylococcus aureus strain RIVM4294 plasmid pRIVM4294, complete sequence	Dutch National Institute for Public Health and the Environment (RIVM)	2009-10-09	Netherlands: Bilthoven	taxon:1280	NA	Homo sapiens	NA	52.13 N 5.210 E	genomic DNA	Staphylococcus aureus	pRIVM4294	RIVM4294	NA	NA	NA	NA	NA	NA	NA	NA	NA	NA	NA	NA	NA	NA	NA	NA	NA	NA	NA	NA	NA	NA	NA	NA	NA	NA
535	CP013626.1	circular	2992	Bacteria	Firmicutes	Bacilli	Bacillales	Staphylococcaceae	Staphylococcus	Staphylococcus aureus	Staphylococcus aureus strain RIVM4296 plasmid pRIVM4296, complete sequence	Dutch National Institute for Public Health and the Environment (RIVM)	2009-10-09	Netherlands: Bilthoven	taxon:1280	NA	Homo sapiens	NA	52.13 N 5.210 E	genomic DNA	Staphylococcus aureus	pRIVM4296	RIVM4296	NA	NA	NA	NA	NA	NA	NA	NA	NA	NA	NA	NA	NA	NA	NA	NA	NA	NA	NA	NA	NA	NA	NA	NA	NA	NA
536	CP013627.1	circular	6183	Bacteria	Firmicutes	Bacilli	Bacillales	Staphylococcaceae	Staphylococcus	Staphylococcus aureus	Staphylococcus aureus strain RIVM1183 plasmid pRIVM1183, complete sequence	Dutch National Institute for Public Health and the Environment (RIVM)	04-Apr-2008	Netherlands: Bilthoven	taxon:1280	NA	Homo sapiens	NA	52.13 N 5.210 E	genomic DNA	Staphylococcus aureus	pRIVM1183	RIVM1183	NA	NA	NA	NA	NA	NA	NA	NA	NA	NA	NA	NA	NA	NA	NA	NA	NA	NA	NA	NA	NA	NA	NA	NA	NA	NA
537	CP013628.1	circular	6686	Bacteria	Firmicutes	Bacilli	Bacillales	Staphylococcaceae	Staphylococcus	Staphylococcus aureus	Staphylococcus aureus strain RIVM4293 plasmid pRIVM4293, complete sequence	Dutch National Institute for Public Health and the Environment (RIVM)	2009-10-09	Netherlands: Bilthoven	taxon:1280	NA	Homo sapiens	NA	52.13 N 5.210 E	genomic DNA	Staphylococcus aureus	pRIVM4293	RIVM4293	NA	NA	NA	NA	NA	NA	NA	NA	NA	NA	NA	NA	NA	NA	NA	NA	NA	NA	NA	NA	NA	NA	NA	NA	NA	NA
538	CP013629.1	circular	7320	Bacteria	Firmicutes	Bacilli	Bacillales	Staphylococcaceae	Staphylococcus	Staphylococcus aureus	Staphylococcus aureus strain RIVM4256 plasmid pRIVM4256, complete sequence	Dutch National Institute for Public Health and the Environment (RIVM)	03-Dec-2010	Netherlands: Bilthoven	taxon:1280	NA	Homo sapiens	NA	52.13 N 5.210 E	genomic DNA	Staphylococcus aureus	pRIVM4256	RIVM4256	NA	NA	NA	NA	NA	NA	NA	NA	NA	NA	NA	NA	NA	NA	NA	NA	NA	NA	NA	NA	NA	NA	NA	NA	NA	NA
539	CP013682.1	circular	196981	Bacteria	Firmicutes	Clostridia	Clostridiales	Clostridiaceae	Clostridium	Clostridium botulinum	Clostridium botulinum strain 1169 plasmid pRSJ8_1, complete sequence	NA	NA	Argentina	taxon:1491	NA	NA	NA	NA	genomic DNA	Clostridium botulinum	pRSJ8_1	1169	NA	NA	NA	NA	Botulism neurotoxin type A3	NA	NA	NA	NA	NA	NA	NA	NA	NA	NA	NA	NA	NA	NA	NA	NA	NA	NA	NA	NA	NA
540	CP013684.1	circular	266230	Bacteria	Firmicutes	Clostridia	Clostridiales	Clostridiaceae	Clostridium	Clostridium botulinum	Clostridium botulinum strain AM282 plasmid pRSJ10_1, complete sequence	NA	NA	Australia	taxon:1491	NA	NA	NA	NA	genomic DNA	Clostridium botulinum	pRSJ10_1	AM282	NA	NA	NA	NA	Botulism neurotoxin type A2	NA	NA	NA	NA	NA	NA	NA	NA	NA	NA	NA	NA	NA	NA	NA	NA	NA	NA	NA	NA	NA
541	CP013687.1	circular	10089	Bacteria	Firmicutes	Clostridia	Clostridiales	Clostridiaceae	Clostridium	Clostridium botulinum	Clostridium botulinum strain F1425 plasmid pRSJ9_1, complete sequence	NA	NA	Argentina	taxon:1491	NA	NA	NA	NA	genomic DNA	Clostridium botulinum	pRSJ9_1	F1425	NA	NA	NA	NA	Botulism neurotoxin type F4	NA	NA	NA	NA	NA	NA	NA	NA	NA	NA	NA	NA	NA	NA	NA	NA	NA	NA	NA	NA	NA
542	CP013706.1	circular	17568	Bacteria	Firmicutes	Clostridia	Clostridiales	Clostridiaceae	Clostridium	Clostridium botulinum	Clostridium botulinum strain F160 plasmid pRSJ3_1, complete sequence	NA	NA	Argentina	taxon:1491	NA	NA	NA	NA	genomic DNA	Clostridium botulinum	pRSJ3_1	F160	NA	NA	NA	NA	Botulinum neurotoxin type F4	NA	NA	NA	NA	NA	NA	NA	NA	NA	NA	NA	NA	NA	NA	NA	NA	NA	NA	NA	NA	NA
543	CP013708.1	circular	11471	Bacteria	Firmicutes	Clostridia	Clostridiales	Clostridiaceae	Clostridium	Clostridium botulinum	Clostridium botulinum strain F634 plasmid pRSJ2_1, complete sequence	NA	NA	Argentina	taxon:1491	NA	NA	NA	NA	genomic DNA	Clostridium botulinum	pRSJ2_1	F634	NA	NA	NA	NA	Botulism neurotoxin type F5	NA	NA	NA	NA	NA	NA	NA	NA	NA	NA	NA	NA	NA	NA	NA	NA	NA	NA	NA	NA	NA
544	CP013709.1	circular	205718	Bacteria	Firmicutes	Clostridia	Clostridiales	Clostridiaceae	Clostridium	Clostridium botulinum	Clostridium botulinum strain F634 plasmid pRSJ2_2, complete sequence	NA	NA	Argentina	taxon:1491	NA	NA	NA	NA	genomic DNA	Clostridium botulinum	pRSJ2_2	F634	NA	NA	NA	NA	Botulism neurotoxin type F5	NA	NA	NA	NA	NA	NA	NA	NA	NA	NA	NA	NA	NA	NA	NA	NA	NA	NA	NA	NA	NA
545	CP013710.1	circular	244784	Bacteria	Firmicutes	Clostridia	Clostridiales	Clostridiaceae	Clostridium	Clostridium botulinum	Clostridium botulinum strain F634 plasmid pRSJ2_3, complete sequence	NA	NA	Argentina	taxon:1491	NA	NA	NA	NA	genomic DNA	Clostridium botulinum	pRSJ2_3	F634	NA	NA	NA	NA	Botulism neurotoxin type F5	NA	NA	NA	NA	NA	NA	NA	NA	NA	NA	NA	NA	NA	NA	NA	NA	NA	NA	NA	NA	NA
546	CP013836.1	circular	140502	Bacteria	Proteobacteria	Gammaproteobacteria	Enterobacterales	Enterobacteriaceae	Escherichia	Escherichia coli	Escherichia coli strain JJ1897 plasmid pJJ1897_1, complete sequence	NA	2004	USA: Minneapolis	taxon:562	NA	Homo sapiens	NA	44.9778 N 93.2650 W	genomic DNA	Escherichia coli	pJJ1897_1	JJ1897	NA	NA	NA	NA	NA	NA	NA	NA	NA	NA	NA	NA	NA	NA	NA	NA	NA	NA	NA	NA	NA	NA	NA	NA	NA	NA
547	CP013931.1	circular	292506	Bacteria	Proteobacteria	Gammaproteobacteria	Alteromonadales	Alteromonadaceae	Alteromonas	Alteromonas mediterranea	Alteromonas mediterranea strain U10 plasmid pAMED10_300, complete sequence	NA	1998	Greece: Ionian Sea	taxon:314275	NA	NA	seawater	35.1 N 21.299999999999955 E	genomic DNA	Alteromonas mediterranea	pAMED10_300	U10	NA	NA	NA	NA	NA	NA	NA	NA	NA	NA	NA	NA	NA	NA	NA	NA	NA	NA	NA	NA	NA	NA	NA	NA	NA	NA
548	CP013960.1	circular	43115	Bacteria	Firmicutes	Bacilli	Bacillales	Staphylococcaceae	Staphylococcus	Staphylococcus aureus	Staphylococcus aureus strain V605 plasmid pV605, complete sequence	Korean Centers for Disease Control and Prevention	2011	South Korea: Cheonju	taxon:1280	NA	Homo sapiens	blood	36.63 N 127.32 E	genomic DNA	Staphylococcus aureus	pV605	V605	NA	NA	NA	NA	NA	NA	NA	NA	NA	NA	NA	NA	NA	NA	NA	NA	NA	NA	NA	NA	NA	NA	NA	NA	NA	NA
549	CP013986.1	circular	163254	Bacteria	Proteobacteria	Gammaproteobacteria	Enterobacterales	Enterobacteriaceae	Klebsiella	Klebsiella variicola	Klebsiella variicola strain LMG 23571 plasmid, complete sequence	NA	1999-10-30	Singapore	taxon:244366	NA	NA	soil	NA	genomic DNA	Klebsiella variicola	unnamed	LMG 23571	NA	NA	NA	NA	NA	NA	LMG:23571	NA	NA	NA	NA	NA	NA	NA	NA	NA	NA	NA	NA	NA	NA	NA	NA	NA	NA	NA
550	CP014058.2	circular	27920	Bacteria	Firmicutes	Bacilli	Bacillales	Staphylococcaceae	Staphylococcus	Staphylococcus saprophyticus	Staphylococcus saprophyticus strain FDAARGOS_137 plasmid, complete sequence	NA	01-Feb-2014	USA: DC	taxon:29385	NA	Homo sapiens	Urine clean catch	NA	genomic DNA	Staphylococcus saprophyticus	unnamed	FDAARGOS_137	NA	NA	NA	NA	NA	NA	NA	NA	NA	NA	NA	NA	NA	NA	NA	NA	NA	NA	NA	NA	NA	NA	NA	NA	NA	NA
551	CP014059.2	circular	21970	Bacteria	Proteobacteria	Betaproteobacteria	Burkholderiales	Alcaligenaceae	Achromobacter	Achromobacter xylosoxidans	Achromobacter xylosoxidans strain FDAARGOS_147 plasmid, complete sequence	NA	2014-03-29	USA: DC	taxon:85698	NA	Homo sapiens	Broviac blood	NA	genomic DNA	Achromobacter xylosoxidans	unnamed	FDAARGOS_147	NA	NA	NA	NA	NA	NA	NA	NA	NA	NA	NA	NA	NA	NA	NA	NA	NA	NA	NA	NA	NA	NA	NA	NA	NA	NA
552	CP014061.1	circular	60588	Bacteria	Proteobacteria	Gammaproteobacteria	Pseudomonadales	Pseudomonadaceae	Pseudomonas	Pseudomonas monteilii	Pseudomonas monteilii strain FDAARGOS_171 plasmid unnamed, complete sequence	Childrens National Hospital	2014-06-26	USA: DC	taxon:76759	NA	Homo sapiens	Sputum	NA	genomic DNA	Pseudomonas monteilii	unnamed	FDAARGOS_171	NA	NA	NA	NA	NA	NA	FDA:FDAARGOS_171	NA	NA	NA	NA	NA	NA	NA	NA	NA	NA	NA	NA	NA	NA	NA	NA	NA	NA	NA
553	CP014063.1	circular	37980	Bacteria	Firmicutes	Bacilli	Bacillales	Staphylococcaceae	Staphylococcus	Staphylococcus aureus	Staphylococcus aureus strain FDAARGOS_159 plasmid unnamed, complete sequence	NA	15-May-2014	USA: DC	taxon:1280	NA	Homo sapiens	Skin swab	NA	genomic DNA	Staphylococcus aureus	unnamed	FDAARGOS_159	NA	NA	NA	NA	NA	NA	NA	NA	NA	NA	NA	NA	NA	NA	NA	NA	NA	NA	NA	NA	NA	NA	NA	NA	NA	NA
554	CP014066.2	circular	18415	Bacteria	Proteobacteria	Betaproteobacteria	Burkholderiales	Alcaligenaceae	Achromobacter	Achromobacter xylosoxidans	Achromobacter xylosoxidans strain FDAARGOS_162 plasmid unnamed, complete sequence	NA	20-May-2014	USA: DC	taxon:85698	NA	Homo sapiens	Sputum	NA	genomic DNA	Achromobacter xylosoxidans	unnamed	FDAARGOS_162	NA	NA	NA	NA	NA	NA	NA	NA	NA	NA	NA	NA	NA	NA	NA	NA	NA	NA	NA	NA	NA	NA	NA	NA	NA	NA
555	CP014068.2	circular	88126	Bacteria	Firmicutes	Bacilli	Lactobacillales	Enterococcaceae	Enterococcus	Enterococcus gallinarum	Enterococcus gallinarum strain FDAARGOS_163 plasmid unnamed, complete sequence	Childrens National Hospital	23-May-2014	USA: DC	taxon:1353	NA	Homo sapiens	Elbow swab	NA	genomic DNA	Enterococcus gallinarum	unnamed	FDAARGOS_163	NA	NA	NA	NA	NA	NA	FDA:FDAARGOS_163	NA	NA	NA	NA	NA	NA	NA	NA	NA	NA	NA	NA	NA	NA	NA	NA	NA	NA	NA
556	CP014096.2	circular	82828	Bacteria	Proteobacteria	Gammaproteobacteria	Enterobacterales	Enterobacteriaceae	Shigella	Shigella sonnei	Shigella sonnei strain FDAARGOS_90 plasmid unnamed1, complete sequence	NA	2013-09-08	USA: DC	taxon:624	NA	Homo sapiens	Stool	NA	genomic DNA	Shigella sonnei	unnamed1	FDAARGOS_90	NA	NA	NA	NA	NA	NA	NA	NA	NA	NA	NA	NA	NA	NA	NA	NA	NA	NA	NA	NA	NA	NA	NA	NA	NA	NA
557	CP014098.1	circular	8141	Bacteria	Proteobacteria	Gammaproteobacteria	Enterobacterales	Enterobacteriaceae	Shigella	Shigella sonnei	Shigella sonnei strain FDAARGOS_90 plasmid unnamed3, complete sequence	NA	2013-09-08	USA: DC	taxon:624	NA	Homo sapiens	Stool	NA	genomic DNA	Shigella sonnei	unnamed3	FDAARGOS_90	NA	NA	NA	NA	NA	NA	NA	NA	NA	NA	NA	NA	NA	NA	NA	NA	NA	NA	NA	NA	NA	NA	NA	NA	NA	NA
558	CP014100.1	circular	8421	Bacteria	Proteobacteria	Gammaproteobacteria	Enterobacterales	Enterobacteriaceae	Shigella	Shigella sonnei	Shigella sonnei strain FDAARGOS_90 plasmid unnamed4, complete sequence	NA	2013-09-08	USA: DC	taxon:624	NA	Homo sapiens	Stool	NA	genomic DNA	Shigella sonnei	unnamed4	FDAARGOS_90	NA	NA	NA	NA	NA	NA	NA	NA	NA	NA	NA	NA	NA	NA	NA	NA	NA	NA	NA	NA	NA	NA	NA	NA	NA	NA
559	CP014101.1	circular	8420	Bacteria	Proteobacteria	Gammaproteobacteria	Enterobacterales	Enterobacteriaceae	Shigella	Shigella sonnei	Shigella sonnei strain FDAARGOS_90 plasmid unnamed5, complete sequence	NA	2013-09-08	USA: DC	taxon:624	NA	Homo sapiens	Stool	NA	genomic DNA	Shigella sonnei	unnamed5	FDAARGOS_90	NA	NA	NA	NA	NA	NA	NA	NA	NA	NA	NA	NA	NA	NA	NA	NA	NA	NA	NA	NA	NA	NA	NA	NA	NA	NA
560	CP014114.1	circular	36907	Bacteria	Firmicutes	Bacilli	Bacillales	Staphylococcaceae	Staphylococcus	Staphylococcus saprophyticus	Staphylococcus saprophyticus strain FDAARGOS_168 plasmid unnamed1, complete sequence	NA	2014-06-19	USA: DC	taxon:29385	NA	Homo sapiens	Urine	NA	genomic DNA	Staphylococcus saprophyticus	unnamed1	FDAARGOS_168	NA	NA	NA	NA	NA	NA	NA	NA	NA	NA	NA	NA	NA	NA	NA	NA	NA	NA	NA	NA	NA	NA	NA	NA	NA	NA
561	CP014115.1	circular	29612	Bacteria	Firmicutes	Bacilli	Bacillales	Staphylococcaceae	Staphylococcus	Staphylococcus saprophyticus	Staphylococcus saprophyticus strain FDAARGOS_168 plasmid unnamed2, complete sequence	NA	2014-06-19	USA: DC	taxon:29385	NA	Homo sapiens	Urine	NA	genomic DNA	Staphylococcus saprophyticus	unnamed2	FDAARGOS_168	NA	NA	NA	NA	NA	NA	NA	NA	NA	NA	NA	NA	NA	NA	NA	NA	NA	NA	NA	NA	NA	NA	NA	NA	NA	NA
562	CP014198.2	circular	7057	Bacteria	Proteobacteria	Gammaproteobacteria	Enterobacterales	Enterobacteriaceae	Escherichia	Escherichia coli	Escherichia coli strain MRE600 plasmid pColE1-MRE600, complete sequence	NA	1950	United Kingdom	taxon:562	NA	NA	NA	NA	genomic DNA	Escherichia coli	pColE1-MRE600	MRE600	NA	NA	NA	NA	NA	NA	ATCC:29417	NA	NA	NA	NA	NA	NA	NA	NA	NA	NA	NA	NA	NA	NA	NA	NA	NA	NA	NA
563	CP014199.1	circular	89107	Bacteria	Proteobacteria	Gammaproteobacteria	Enterobacterales	Enterobacteriaceae	Escherichia	Escherichia coli	Escherichia coli strain MRE600 plasmid pMRE600-1, complete sequence	NA	1950	United Kingdom	taxon:562	NA	NA	NA	NA	genomic DNA	Escherichia coli	pMRE600-1	MRE600	NA	NA	NA	NA	NA	NA	ATCC:29417	NA	NA	NA	NA	NA	NA	NA	NA	NA	NA	NA	NA	NA	NA	NA	NA	NA	NA	NA
564	CP014200.1	circular	56887	Bacteria	Proteobacteria	Gammaproteobacteria	Enterobacterales	Enterobacteriaceae	Escherichia	Escherichia coli	Escherichia coli strain MRE600 plasmid pMRE600-2, complete sequence	NA	1950	United Kingdom	taxon:562	NA	NA	NA	NA	genomic DNA	Escherichia coli	pMRE600-2	MRE600	NA	NA	NA	NA	NA	NA	ATCC:29417	NA	NA	NA	NA	NA	NA	NA	NA	NA	NA	NA	NA	NA	NA	NA	NA	NA	NA	NA
565	CP014292.1	circular	84967	Bacteria	Proteobacteria	Gammaproteobacteria	Pseudomonadales	Moraxellaceae	Acinetobacter	Acinetobacter baumannii	Acinetobacter baumannii strain AB34299 plasmid unnamed1, complete sequence	USAMRIID	01-Dec-2015	NA	taxon:470	NA	Homo sapiens	NA	NA	genomic DNA	Acinetobacter baumannii	unnamed1	AB34299	NA	NA	NA	NA	NA	NA	NA	NA	NA	NA	NA	NA	NA	NA	NA	NA	NA	NA	NA	NA	NA	NA	NA	NA	NA	NA
566	CP014293.1	circular	15645	Bacteria	Proteobacteria	Gammaproteobacteria	Pseudomonadales	Moraxellaceae	Acinetobacter	Acinetobacter baumannii	Acinetobacter baumannii strain AB34299 plasmid unnamed2, complete sequence	USAMRIID	01-Dec-2015	NA	taxon:470	NA	Homo sapiens	NA	NA	genomic DNA	Acinetobacter baumannii	unnamed2	AB34299	NA	NA	NA	NA	NA	NA	NA	NA	NA	NA	NA	NA	NA	NA	NA	NA	NA	NA	NA	NA	NA	NA	NA	NA	NA	NA
567	CP014355.1	circular	37397	Bacteria	Proteobacteria	Gammaproteobacteria	Legionellales	Coxiellaceae	Coxiella	Coxiella burnetii	Coxiella burnetii strain 3345937 plasmid, complete sequence	NA	NA	NA	taxon:777	NA	NA	NA	NA	genomic DNA	Coxiella burnetii	unnamed	3345937	NA	NA	NA	NA	NA	NA	NA	NA	NA	NA	NA	NA	NA	NA	NA	NA	NA	NA	NA	NA	NA	NA	NA	NA	NA	NA
568	CP014364.1	circular	27068	Bacteria	Firmicutes	Bacilli	Bacillales	Staphylococcaceae	Staphylococcus	Staphylococcus aureus	Staphylococcus aureus strain USA300-SUR1 plasmid pUSA04-1-SUR1, complete sequence	Sandra Hermelijn	2013-03-26	Suriname: Paramaribo	taxon:1280	NA	Homo sapiens	Perineum	5.86667 N 55.1667 W	genomic DNA	Staphylococcus aureus	pUSA04-1-SUR1	USA300-SUR1	NA	NA	NA	NA	NA	NA	NA	NA	NA	NA	NA	NA	NA	NA	NA	NA	NA	NA	NA	NA	NA	NA	NA	NA	NA	NA
569	CP014369.1	circular	3125	Bacteria	Firmicutes	Bacilli	Bacillales	Staphylococcaceae	Staphylococcus	Staphylococcus aureus	Staphylococcus aureus strain USA300-SUR3 plasmid pUSA01-1-SUR3, complete sequence	Sandra Hermelijn	24-Apr-2013	Suriname: Paramaribo	taxon:1280	NA	Homo sapiens	Wound fluid	5.86667 N 55.1667 W	genomic DNA	Staphylococcus aureus	pUSA01-1-SUR3	USA300-SUR3	NA	NA	NA	NA	NA	NA	NA	NA	NA	NA	NA	NA	NA	NA	NA	NA	NA	NA	NA	NA	NA	NA	NA	NA	NA	NA
570	CP014379.1	circular	2473	Bacteria	Firmicutes	Bacilli	Bacillales	Staphylococcaceae	Staphylococcus	Staphylococcus aureus	Staphylococcus aureus strain USA300-SUR5 plasmid pUSA05-1-SUR5, complete sequence	Sandra Hermelijn	25-Apr-2013	Suriname: Paramaribo	taxon:1280	NA	Homo sapiens	Sputum	5.86667 N 55.1667 W	genomic DNA	Staphylococcus aureus	pUSA05-1-SUR5	USA300-SUR5	NA	NA	NA	NA	NA	NA	NA	NA	NA	NA	NA	NA	NA	NA	NA	NA	NA	NA	NA	NA	NA	NA	NA	NA	NA	NA
571	CP014385.1	circular	3125	Bacteria	Firmicutes	Bacilli	Bacillales	Staphylococcaceae	Staphylococcus	Staphylococcus aureus	Staphylococcus aureus strain USA300-SUR7 plasmid pUSA01-1-SUR7, complete sequence	Sandra Hermelijn	30-Apr-2013	Suriname: Paramaribo	taxon:1280	NA	Homo sapiens	Pus leg	5.86667 N 55.1667 W	genomic DNA	Staphylococcus aureus	pUSA01-1-SUR7	USA300-SUR7	NA	NA	NA	NA	NA	NA	NA	NA	NA	NA	NA	NA	NA	NA	NA	NA	NA	NA	NA	NA	NA	NA	NA	NA	NA	NA
572	CP014386.1	circular	26135	Bacteria	Firmicutes	Bacilli	Bacillales	Staphylococcaceae	Staphylococcus	Staphylococcus aureus	Staphylococcus aureus strain USA300-SUR7 plasmid pUSA04-3-SUR7, complete sequence	Sandra Hermelijn	30-Apr-2013	Suriname: Paramaribo	taxon:1280	NA	Homo sapiens	Pus leg	5.86667 N 55.1667 W	genomic DNA	Staphylococcus aureus	pUSA04-3-SUR7	USA300-SUR7	NA	NA	NA	NA	NA	NA	NA	NA	NA	NA	NA	NA	NA	NA	NA	NA	NA	NA	NA	NA	NA	NA	NA	NA	NA	NA
573	CP014450.1	circular	189452	Bacteria	Firmicutes	Bacilli	Lactobacillales	Enterococcaceae	Enterococcus	Enterococcus faecium	Enterococcus faecium strain ATCC 700221 plasmid unnamed1, complete sequence	NA	NA	NA	taxon:1352	NA	NA	NA	NA	genomic DNA	Enterococcus faecium	unnamed1	ATCC 700221	NA	NA	NA	NA	NA	NA	NA	NA	NA	NA	NA	NA	NA	NA	NA	NA	NA	NA	NA	NA	NA	NA	NA	NA	NA	NA
574	CP014451.1	circular	63692	Bacteria	Firmicutes	Bacilli	Lactobacillales	Enterococcaceae	Enterococcus	Enterococcus faecium	Enterococcus faecium strain ATCC 700221 plasmid unnamed2, complete sequence	NA	NA	NA	taxon:1352	NA	NA	NA	NA	genomic DNA	Enterococcus faecium	unnamed2	ATCC 700221	NA	NA	NA	NA	NA	NA	NA	NA	NA	NA	NA	NA	NA	NA	NA	NA	NA	NA	NA	NA	NA	NA	NA	NA	NA	NA
575	CP014452.1	circular	39138	Bacteria	Firmicutes	Bacilli	Lactobacillales	Enterococcaceae	Enterococcus	Enterococcus faecium	Enterococcus faecium strain ATCC 700221 plasmid unnamed3, complete sequence	NA	NA	NA	taxon:1352	NA	NA	NA	NA	genomic DNA	Enterococcus faecium	unnamed3	ATCC 700221	NA	NA	NA	NA	NA	NA	NA	NA	NA	NA	NA	NA	NA	NA	NA	NA	NA	NA	NA	NA	NA	NA	NA	NA	NA	NA
576	CP014493.1	circular	128305	Bacteria	Proteobacteria	Gammaproteobacteria	Enterobacterales	Enterobacteriaceae	Escherichia	Escherichia coli	Escherichia coli strain MVAST0167 plasmid pMVAST0167_1, complete sequence	NA	2010	USA: Minneapolis	taxon:562	NA	Homo sapiens	NA	44.9778 N 93.2650 W	genomic DNA	Escherichia coli	pMVAST0167_1	MVAST0167	NA	NA	NA	NA	NA	NA	NA	NA	NA	NA	NA	NA	NA	NA	NA	NA	NA	NA	NA	NA	NA	NA	NA	NA	NA	NA
577	CP014494.1	circular	78992	Bacteria	Proteobacteria	Gammaproteobacteria	Enterobacterales	Enterobacteriaceae	Escherichia	Escherichia coli	Escherichia coli strain MVAST0167 plasmid pMVAST0167_2, complete sequence	NA	2010	USA: Minneapolis	taxon:562	NA	Homo sapiens	NA	44.9778 N 93.2650 W	genomic DNA	Escherichia coli	pMVAST0167_2	MVAST0167	NA	NA	NA	NA	NA	NA	NA	NA	NA	NA	NA	NA	NA	NA	NA	NA	NA	NA	NA	NA	NA	NA	NA	NA	NA	NA
578	CP014652.1	circular	141965	Bacteria	Proteobacteria	Gammaproteobacteria	Pseudomonadales	Moraxellaceae	Acinetobacter	Acinetobacter sp. DUT-2	Acinetobacter sp. DUT-2 plasmid unnamed1, complete sequence	Haixia Pan	20-Dec-2015	China: Panjin, Liaodong Bay	taxon:1809055	NA	NA	marine sediments	NA	genomic DNA	Acinetobacter sp. DUT-2	unnamed1	DUT-2	NA	NA	NA	NA	NA	NA	NA	NA	NA	NA	NA	NA	NA	NA	NA	NA	NA	NA	NA	NA	NA	NA	NA	NA	NA	NA
579	CP014653.1	circular	50047	Bacteria	Proteobacteria	Gammaproteobacteria	Pseudomonadales	Moraxellaceae	Acinetobacter	Acinetobacter sp. DUT-2	Acinetobacter sp. DUT-2 plasmid unnamed2, complete sequence	Haixia Pan	20-Dec-2015	China: Panjin, Liaodong Bay	taxon:1809055	NA	NA	marine sediments	NA	genomic DNA	Acinetobacter sp. DUT-2	unnamed2	DUT-2	NA	NA	NA	NA	NA	NA	NA	NA	NA	NA	NA	NA	NA	NA	NA	NA	NA	NA	NA	NA	NA	NA	NA	NA	NA	NA
580	CP014654.1	circular	19820	Bacteria	Proteobacteria	Gammaproteobacteria	Pseudomonadales	Moraxellaceae	Acinetobacter	Acinetobacter sp. DUT-2	Acinetobacter sp. DUT-2 plasmid unnamed3, complete sequence	Haixia Pan	20-Dec-2015	China: Panjin, Liaodong Bay	taxon:1809055	NA	NA	marine sediments	NA	genomic DNA	Acinetobacter sp. DUT-2	unnamed3	DUT-2	NA	NA	NA	NA	NA	NA	NA	NA	NA	NA	NA	NA	NA	NA	NA	NA	NA	NA	NA	NA	NA	NA	NA	NA	NA	NA
581	CP014655.1	circular	11158	Bacteria	Proteobacteria	Gammaproteobacteria	Pseudomonadales	Moraxellaceae	Acinetobacter	Acinetobacter sp. DUT-2	Acinetobacter sp. DUT-2 plasmid unnamed4, complete sequence	Haixia Pan	20-Dec-2015	China: Panjin, Liaodong Bay	taxon:1809055	NA	NA	marine sediments	NA	genomic DNA	Acinetobacter sp. DUT-2	unnamed4	DUT-2	NA	NA	NA	NA	NA	NA	NA	NA	NA	NA	NA	NA	NA	NA	NA	NA	NA	NA	NA	NA	NA	NA	NA	NA	NA	NA
582	CP014656.1	circular	5511	Bacteria	Proteobacteria	Gammaproteobacteria	Pseudomonadales	Moraxellaceae	Acinetobacter	Acinetobacter sp. DUT-2	Acinetobacter sp. DUT-2 plasmid unnamed5, complete sequence	Haixia Pan	20-Dec-2015	China: Panjin, Liaodong Bay	taxon:1809055	NA	NA	marine sediments	NA	genomic DNA	Acinetobacter sp. DUT-2	unnamed5	DUT-2	NA	NA	NA	NA	NA	NA	NA	NA	NA	NA	NA	NA	NA	NA	NA	NA	NA	NA	NA	NA	NA	NA	NA	NA	NA	NA
583	CP014753.1	circular	72996	Bacteria	Proteobacteria	Gammaproteobacteria	Enterobacterales	Enterobacteriaceae	Escherichia	Escherichia coli	Escherichia coli strain PSUO103 plasmid, complete sequence	NA	2012-06-20	USA	taxon:562	NA	Odocoileus virginianus	feces	40.8242 N 77.8546 W	genomic DNA	Escherichia coli	unnamed	PSUO103	NA	NA	NA	NA	NA	NA	NA	NA	NA	NA	NA	NA	NA	NA	NA	NA	NA	NA	NA	NA	NA	NA	NA	NA	NA	NA
584	CP014776.1	circular	242312	Bacteria	Proteobacteria	Gammaproteobacteria	Enterobacterales	Enterobacteriaceae	Pluralibacter	Pluralibacter gergoviae	Pluralibacter gergoviae strain FB2 plasmid pFB2.1, complete sequence	NA	Apr-2013	Malaysia	taxon:61647	NA	NA	Fish ball	NA	genomic DNA	Pluralibacter gergoviae	pFB2.1	FB2	NA	NA	NA	NA	NA	NA	NA	NA	NA	NA	NA	NA	NA	NA	NA	NA	NA	NA	NA	NA	NA	NA	NA	NA	NA	NA
585	CP014777.1	circular	147881	Bacteria	Proteobacteria	Gammaproteobacteria	Enterobacterales	Enterobacteriaceae	Pluralibacter	Pluralibacter gergoviae	Pluralibacter gergoviae strain FB2 plasmid pFB2.2, complete sequence	NA	Apr-2013	Malaysia	taxon:61647	NA	NA	Fish ball	NA	genomic DNA	Pluralibacter gergoviae	pFB2.2	FB2	NA	NA	NA	NA	NA	NA	NA	NA	NA	NA	NA	NA	NA	NA	NA	NA	NA	NA	NA	NA	NA	NA	NA	NA	NA	NA
586	CP014778.1	circular	140505	Bacteria	Proteobacteria	Gammaproteobacteria	Enterobacterales	Enterobacteriaceae	Pluralibacter	Pluralibacter gergoviae	Pluralibacter gergoviae strain FB2 plasmid pFB2.3, complete sequence	NA	Apr-2013	Malaysia	taxon:61647	NA	NA	Fish ball	NA	genomic DNA	Pluralibacter gergoviae	pFB2.3	FB2	NA	NA	NA	NA	NA	NA	NA	NA	NA	NA	NA	NA	NA	NA	NA	NA	NA	NA	NA	NA	NA	NA	NA	NA	NA	NA
587	CP014779.1	circular	14526	Bacteria	Proteobacteria	Gammaproteobacteria	Enterobacterales	Enterobacteriaceae	Pluralibacter	Pluralibacter gergoviae	Pluralibacter gergoviae strain FB2 plasmid pFB2.4, complete sequence	NA	Apr-2013	Malaysia	taxon:61647	NA	NA	Fish ball	NA	genomic DNA	Pluralibacter gergoviae	pFB2.4	FB2	NA	NA	NA	NA	NA	NA	NA	NA	NA	NA	NA	NA	NA	NA	NA	NA	NA	NA	NA	NA	NA	NA	NA	NA	NA	NA
588	CP014788.1	circular	51191	Bacteria	Firmicutes	Bacilli	Lactobacillales	Lactobacillaceae	Lactobacillus	Lactobacillus oris	Lactobacillus oris strain J-1 plasmid unnamed1, complete sequence	NA	NA	NA	taxon:1632	NA	NA	NA	NA	genomic DNA	Lactobacillus oris	unnamed1	J-1	NA	NA	NA	NA	NA	NA	NA	NA	NA	NA	NA	NA	NA	NA	NA	NA	NA	NA	NA	NA	NA	NA	NA	NA	NA	NA
589	CP014789.1	circular	13611	Bacteria	Firmicutes	Bacilli	Lactobacillales	Lactobacillaceae	Lactobacillus	Lactobacillus oris	Lactobacillus oris strain J-1 plasmid unnamed2, complete sequence	NA	NA	NA	taxon:1632	NA	NA	NA	NA	genomic DNA	Lactobacillus oris	unnamed2	J-1	NA	NA	NA	NA	NA	NA	NA	NA	NA	NA	NA	NA	NA	NA	NA	NA	NA	NA	NA	NA	NA	NA	NA	NA	NA	NA
590	CP014962.1	circular	93850	Bacteria	Proteobacteria	Gammaproteobacteria	Enterobacterales	Enterobacteriaceae	Salmonella	Salmonella enterica	Salmonella enterica subsp. enterica serovar Typhimurium str. USDA-ARS-USMARC-1899 plasmid pSTY1-1899, complete sequence	USMARC	Apr-2007	USA: United States BIFSCo Region 1	taxon:1454639	NA	Bos taurus	ground beef	NA	genomic DNA	Salmonella enterica subsp. enterica serovar Typhimurium str. USDA-ARS-USMARC-1899	pSTY1-1899	USDA-ARS-USMARC-1899	Typhimurium	enterica	NA	NA	NA	NA	NA	NA	NA	NA	NA	NA	NA	NA	NA	NA	NA	NA	NA	NA	NA	NA	NA	NA	NA	NA
591	CP015181.1	circular	8208	Bacteria	Firmicutes	Bacilli	Bacillales	Bacillaceae	Bacillus	Bacillus thuringiensis	Bacillus thuringiensis serovar alesti strain BGSC 4C1 plasmid pBMB8208, complete sequence	NA	1987	Czechoslovakia	taxon:1440	NA	NA	soil	NA	genomic DNA	Bacillus thuringiensis serovar alesti	pBMB8208	BGSC 4C1	alesti	NA	NA	NA	NA	NA	NA	NA	NA	NA	NA	NA	NA	NA	NA	NA	NA	NA	NA	NA	NA	NA	NA	NA	NA	NA
592	CP015456.1	circular	13697	Bacteria	Proteobacteria	Deltaproteobacteria	Desulfuromonadales	Desulfuromonadaceae	Pelobacter	Pelobacter acetylenicus	Pelobacter acetylenicus strain DSM 3246 plasmid unnamed, complete sequence	NA	1986	Germany	taxon:29542	NA	NA	sediment	NA	genomic DNA	Pelobacter acetylenicus	unnamed	DSM 3246	NA	NA	NA	NA	NA	NA	NA	NA	type strain of Pelobacter acetylenicus	NA	NA	NA	NA	NA	NA	NA	NA	NA	NA	NA	NA	NA	NA	NA	NA	NA
593	CP015599.1	circular	94046	Bacteria	Proteobacteria	Gammaproteobacteria	Enterobacterales	Enterobacteriaceae	Salmonella	Salmonella enterica	Salmonella enterica strain FORC_030 plasmid pFORC_030, complete sequence	Korea Center for Disease Control and Prevention	2009-12-09	South Korea: Gangwon	taxon:28901	NA	Homo sapiens	stool	37.89 N 127.7300 E	genomic DNA	Salmonella enterica	pFORC_030	FORC_030	NA	NA	NA	NA	NA	NA	NA	NA	NA	NA	NA	NA	NA	NA	NA	NA	NA	NA	NA	NA	NA	NA	NA	NA	NA	NA
594	CP015627.1	circular	2360	Bacteria	Firmicutes	Bacilli	Bacillales	Staphylococcaceae	Staphylococcus	Staphylococcus pseudintermedius	Staphylococcus pseudintermedius strain 063228 plasmid pl1, complete sequence	University of Tennessee	2006	USA	taxon:283734	NA	Canis lupus familiaris	Clinical	35.9544 N 83.92950000000002 W	genomic DNA	Staphylococcus pseudintermedius	pl1	63228	NA	NA	NA	NA	genotype: ST68	NA	NA	NA	NA	NA	NA	NA	NA	NA	NA	NA	NA	NA	NA	NA	NA	NA	NA	NA	NA	NA
595	CP015628.1	circular	2730	Bacteria	Firmicutes	Bacilli	Bacillales	Staphylococcaceae	Staphylococcus	Staphylococcus pseudintermedius	Staphylococcus pseudintermedius strain 063228 plasmid pl2, complete sequence	University of Tennessee	2006	USA	taxon:283734	NA	Canis lupus familiaris	Clinical	35.9544 N 83.92950000000002 W	genomic DNA	Staphylococcus pseudintermedius	pl2	63228	NA	NA	NA	NA	genotype: ST68	NA	NA	NA	NA	NA	NA	NA	NA	NA	NA	NA	NA	NA	NA	NA	NA	NA	NA	NA	NA	NA
596	CP015630.1	linear	159481	Bacteria	Spirochaetes	Spirochaetia	Spirochaetales	Borreliaceae	Borrelia	Borrelia turicatae	Borrelia turicatae strain BTE5EL plasmid lp159, complete sequence	NA	2015	USA: Texas	taxon:142	NA	Homo sapiens	NA	NA	genomic DNA	Borrelia turicatae	lp159	BTE5EL	NA	NA	NA	NA	NA	NA	NA	NA	NA	NA	NA	NA	NA	NA	NA	NA	NA	NA	NA	NA	NA	NA	NA	NA	NA	NA
597	CP015631.1	linear	24053	Bacteria	Spirochaetes	Spirochaetia	Spirochaetales	Borreliaceae	Borrelia	Borrelia turicatae	Borrelia turicatae strain BTE5EL plasmid lp24, complete sequence	NA	2015	USA: Texas	taxon:142	NA	Homo sapiens	NA	NA	genomic DNA	Borrelia turicatae	lp24	BTE5EL	NA	NA	NA	NA	NA	NA	NA	NA	NA	NA	NA	NA	NA	NA	NA	NA	NA	NA	NA	NA	NA	NA	NA	NA	NA	NA
598	CP015632.1	linear	30326	Bacteria	Spirochaetes	Spirochaetia	Spirochaetales	Borreliaceae	Borrelia	Borrelia turicatae	Borrelia turicatae strain BTE5EL plasmid lp30, complete sequence	NA	2015	USA: Texas	taxon:142	NA	Homo sapiens	NA	NA	genomic DNA	Borrelia turicatae	lp30	BTE5EL	NA	NA	NA	NA	NA	NA	NA	NA	NA	NA	NA	NA	NA	NA	NA	NA	NA	NA	NA	NA	NA	NA	NA	NA	NA	NA
599	CP015633.1	linear	31767	Bacteria	Spirochaetes	Spirochaetia	Spirochaetales	Borreliaceae	Borrelia	Borrelia turicatae	Borrelia turicatae strain BTE5EL plasmid lp31, complete sequence	NA	2015	USA: Texas	taxon:142	NA	Homo sapiens	NA	NA	genomic DNA	Borrelia turicatae	lp31	BTE5EL	NA	NA	NA	NA	NA	NA	NA	NA	NA	NA	NA	NA	NA	NA	NA	NA	NA	NA	NA	NA	NA	NA	NA	NA	NA	NA
600	CP015634.1	linear	40910	Bacteria	Spirochaetes	Spirochaetia	Spirochaetales	Borreliaceae	Borrelia	Borrelia turicatae	Borrelia turicatae strain BTE5EL plasmid lp40, complete sequence	NA	2015	USA: Texas	taxon:142	NA	Homo sapiens	NA	NA	genomic DNA	Borrelia turicatae	lp40	BTE5EL	NA	NA	NA	NA	NA	NA	NA	NA	NA	NA	NA	NA	NA	NA	NA	NA	NA	NA	NA	NA	NA	NA	NA	NA	NA	NA
601	CP015635.1	linear	44848	Bacteria	Spirochaetes	Spirochaetia	Spirochaetales	Borreliaceae	Borrelia	Borrelia turicatae	Borrelia turicatae strain BTE5EL plasmid lp44, complete sequence	NA	2015	USA: Texas	taxon:142	NA	Homo sapiens	NA	NA	genomic DNA	Borrelia turicatae	lp44	BTE5EL	NA	NA	NA	NA	NA	NA	NA	NA	NA	NA	NA	NA	NA	NA	NA	NA	NA	NA	NA	NA	NA	NA	NA	NA	NA	NA
602	CP015636.1	linear	48826	Bacteria	Spirochaetes	Spirochaetia	Spirochaetales	Borreliaceae	Borrelia	Borrelia turicatae	Borrelia turicatae strain BTE5EL plasmid lp48, complete sequence	NA	2015	USA: Texas	taxon:142	NA	Homo sapiens	NA	NA	genomic DNA	Borrelia turicatae	lp48	BTE5EL	NA	NA	NA	NA	NA	NA	NA	NA	NA	NA	NA	NA	NA	NA	NA	NA	NA	NA	NA	NA	NA	NA	NA	NA	NA	NA
603	CP016074.1	circular	3785	Bacteria	Firmicutes	Bacilli	Bacillales	Staphylococcaceae	Staphylococcus	Staphylococcus pseudintermedius	Staphylococcus pseudintermedius strain 081661 plasmid unnamed1, complete sequence	UTCVM	2008	USA	taxon:283734	NA	Canine	skin	35.9544 N 83.92950000000002 W	genomic DNA	Staphylococcus pseudintermedius	unnamed1	81661	NA	NA	NA	20081661	NA	NA	NA	NA	NA	NA	NA	NA	NA	NA	NA	NA	NA	NA	NA	NA	NA	NA	NA	NA	NA	NA
604	CP016075.1	circular	4439	Bacteria	Firmicutes	Bacilli	Bacillales	Staphylococcaceae	Staphylococcus	Staphylococcus pseudintermedius	Staphylococcus pseudintermedius strain 081661 plasmid unnamed2, complete sequence	UTCVM	2008	USA	taxon:283734	NA	Canine	skin	35.9544 N 83.92950000000002 W	genomic DNA	Staphylococcus pseudintermedius	unnamed2	81661	NA	NA	NA	20081661	NA	NA	NA	NA	NA	NA	NA	NA	NA	NA	NA	NA	NA	NA	NA	NA	NA	NA	NA	NA	NA	NA
605	CP016081.1	linear	1095	Bacteria	Actinobacteria	Actinobacteria	Streptomycetales	Streptomycetaceae	Streptomyces	Streptomyces sp. SAT1	Streptomyces sp. SAT1 plasmid unnamed1, complete sequence	NA	2011-10-30	China: Beijing	taxon:1849967	NA	Adenophora trachelioides Maxim.	NA	NA	genomic DNA	Streptomyces sp. SAT1	unnamed1	SAT1	NA	NA	NA	NA	NA	NA	NA	NA	NA	NA	NA	NA	NA	NA	NA	NA	NA	NA	NA	NA	NA	NA	NA	NA	NA	NA
606	CP016082.1	linear	343282	Bacteria	Actinobacteria	Actinobacteria	Streptomycetales	Streptomycetaceae	Streptomyces	Streptomyces sp. SAT1	Streptomyces sp. SAT1 plasmid unnamed2, complete sequence	NA	2011-10-30	China: Beijing	taxon:1849967	NA	Adenophora trachelioides Maxim.	NA	NA	genomic DNA	Streptomyces sp. SAT1	unnamed2	SAT1	NA	NA	NA	NA	NA	NA	NA	NA	NA	NA	NA	NA	NA	NA	NA	NA	NA	NA	NA	NA	NA	NA	NA	NA	NA	NA
607	CP016083.1	linear	840523	Bacteria	Actinobacteria	Actinobacteria	Streptomycetales	Streptomycetaceae	Streptomyces	Streptomyces sp. SAT1	Streptomyces sp. SAT1 plasmid unnamed3, complete sequence	NA	2011-10-30	China: Beijing	taxon:1849967	NA	Adenophora trachelioides Maxim.	NA	NA	genomic DNA	Streptomyces sp. SAT1	unnamed3	SAT1	NA	NA	NA	NA	NA	NA	NA	NA	NA	NA	NA	NA	NA	NA	NA	NA	NA	NA	NA	NA	NA	NA	NA	NA	NA	NA
608	CP016084.1	linear	92538	Bacteria	Actinobacteria	Actinobacteria	Streptomycetales	Streptomycetaceae	Streptomyces	Streptomyces sp. SAT1	Streptomyces sp. SAT1 plasmid unnamed4, complete sequence	NA	2011-10-30	China: Beijing	taxon:1849967	NA	Adenophora trachelioides Maxim.	NA	NA	genomic DNA	Streptomyces sp. SAT1	unnamed4	SAT1	NA	NA	NA	NA	NA	NA	NA	NA	NA	NA	NA	NA	NA	NA	NA	NA	NA	NA	NA	NA	NA	NA	NA	NA	NA	NA
609	CP016183.1	circular	230278	Bacteria	Proteobacteria	Gammaproteobacteria	Enterobacterales	Enterobacteriaceae	Escherichia	Escherichia coli	Escherichia coli strain EC2_1 plasmid pEC2_1-4, complete sequence	NA	NA	NA	taxon:562	NA	NA	NA	NA	genomic DNA	Escherichia coli	pEC2_1-4	EC2_1	NA	NA	NA	NA	NA	NA	NA	NA	NA	NA	NA	NA	NA	NA	NA	NA	NA	NA	NA	NA	NA	NA	NA	NA	NA	NA
610	CP016184.1	circular	235403	Bacteria	Proteobacteria	Gammaproteobacteria	Enterobacterales	Enterobacteriaceae	Escherichia	Escherichia coli	Escherichia coli strain EC2 plasmid pEC2-4, complete sequence	NA	NA	NA	taxon:562	NA	NA	NA	NA	genomic DNA	Escherichia coli	pEC2-4	EC2	NA	NA	NA	NA	NA	NA	NA	NA	NA	NA	NA	NA	NA	NA	NA	NA	NA	NA	NA	NA	NA	NA	NA	NA	NA	NA
611	CP016185.1	circular	61735	Bacteria	Proteobacteria	Gammaproteobacteria	Enterobacterales	Enterobacteriaceae	Escherichia	Escherichia coli	Escherichia coli strain EC5 plasmid pEC5-1, complete sequence	NA	NA	NA	taxon:562	NA	NA	NA	NA	genomic DNA	Escherichia coli	pEC5-1	EC5	NA	NA	NA	NA	NA	NA	NA	NA	NA	NA	NA	NA	NA	NA	NA	NA	NA	NA	NA	NA	NA	NA	NA	NA	NA	NA
612	CP016186.1	circular	60218	Bacteria	Proteobacteria	Gammaproteobacteria	Enterobacterales	Enterobacteriaceae	Escherichia	Escherichia coli	Escherichia coli strain EC13 plasmid pEC13-1, complete sequence	NA	NA	NA	taxon:562	NA	NA	NA	NA	genomic DNA	Escherichia coli	pEC13-1	EC13	NA	NA	NA	NA	NA	NA	NA	NA	NA	NA	NA	NA	NA	NA	NA	NA	NA	NA	NA	NA	NA	NA	NA	NA	NA	NA
613	CP016187.1	circular	60950	Bacteria	Proteobacteria	Gammaproteobacteria	Enterobacterales	Enterobacteriaceae	Escherichia	Escherichia coli	Escherichia coli strain S2.14 plasmid pS2.14-2, complete sequence	NA	NA	NA	taxon:562	NA	NA	NA	NA	genomic DNA	Escherichia coli	pS2.14-2	S2.14	NA	NA	NA	NA	NA	NA	NA	NA	NA	NA	NA	NA	NA	NA	NA	NA	NA	NA	NA	NA	NA	NA	NA	NA	NA	NA
614	CP016195.1	circular	317818	Bacteria	Firmicutes	Bacilli	Bacillales	Bacillaceae	Bacillus	Bacillus thuringiensis	Bacillus thuringiensis serovar coreanensis strain ST7 plasmid pST7-1, complete sequence	NA	NA	NA	taxon:180843	NA	NA	NA	NA	genomic DNA	Bacillus thuringiensis serovar coreanensis	pST7-1	ST7	coreanensis	NA	NA	NA	NA	NA	NA	NA	NA	NA	NA	NA	NA	NA	NA	NA	NA	NA	NA	NA	NA	NA	NA	NA	NA	NA
615	CP016196.1	circular	149450	Bacteria	Firmicutes	Bacilli	Bacillales	Bacillaceae	Bacillus	Bacillus thuringiensis	Bacillus thuringiensis serovar coreanensis strain ST7 plasmid pST7-2, complete sequence	NA	NA	NA	taxon:180843	NA	NA	NA	NA	genomic DNA	Bacillus thuringiensis serovar coreanensis	pST7-2	ST7	coreanensis	NA	NA	NA	NA	NA	NA	NA	NA	NA	NA	NA	NA	NA	NA	NA	NA	NA	NA	NA	NA	NA	NA	NA	NA	NA
616	CP016197.1	circular	92610	Bacteria	Firmicutes	Bacilli	Bacillales	Bacillaceae	Bacillus	Bacillus thuringiensis	Bacillus thuringiensis serovar coreanensis strain ST7 plasmid pST7-3, complete sequence	NA	NA	NA	taxon:180843	NA	NA	NA	NA	genomic DNA	Bacillus thuringiensis serovar coreanensis	pST7-3	ST7	coreanensis	NA	NA	NA	NA	NA	NA	NA	NA	NA	NA	NA	NA	NA	NA	NA	NA	NA	NA	NA	NA	NA	NA	NA	NA	NA
617	CP016198.1	circular	60883	Bacteria	Firmicutes	Bacilli	Bacillales	Bacillaceae	Bacillus	Bacillus thuringiensis	Bacillus thuringiensis serovar coreanensis strain ST7 plasmid pST7-4, complete sequence	NA	NA	NA	taxon:180843	NA	NA	NA	NA	genomic DNA	Bacillus thuringiensis serovar coreanensis	pST7-4	ST7	coreanensis	NA	NA	NA	NA	NA	NA	NA	NA	NA	NA	NA	NA	NA	NA	NA	NA	NA	NA	NA	NA	NA	NA	NA	NA	NA
618	CP016203.1	linear	3336	Bacteria	Firmicutes	Clostridia	Clostridiales	Clostridiales Family XIII. Incertae Sedis	NA	Eubacterium minutum	Eubacterium minutum ATCC 700079 plasmid unnamed1, complete sequence	NA	NA	Japan: Niigata	taxon:888721	NA	Homo sapiens	curette	37.92 N 139.04 E	genomic DNA	Eubacterium minutum ATCC 700079	unnamed1	ATCC 700079	NA	NA	NA	NA	NA	NA	ATCC:700079	NA	type strain of Eubacterium minutum	NA	NA	NA	NA	NA	NA	NA	NA	NA	NA	NA	NA	NA	NA	NA	NA	NA
619	CP016253.1	circular	65072	Bacteria	Proteobacteria	Gammaproteobacteria	Vibrionales	Vibrionaceae	Vibrio	Vibrio anguillarum	Vibrio anguillarum strain 87-9-117 plasmid pJM1, complete sequence	NA	1995-03-01	Finland	taxon:55601	NA	NA	Rainbow trout	NA	genomic DNA	Vibrio anguillarum	pJM1	87-9-117	NA	NA	NA	NA	NA	NA	NA	NA	NA	NA	NA	NA	NA	NA	NA	NA	NA	NA	NA	NA	NA	NA	NA	NA	NA	NA
620	CP016281.1	circular	62833	Bacteria	Firmicutes	Clostridia	Clostridiales	Clostridiaceae	Clostridium	Clostridium tyrobutyricum	Clostridium tyrobutyricum strain W428 plasmid pW428, complete sequence	NA	2015-10-30	China: Xinjiang Uyghur Autonomous Region	taxon:1519	NA	NA	bovine rumen	NA	genomic DNA	Clostridium tyrobutyricum	pW428	W428	NA	NA	NA	NA	NA	NA	CCTCC:M 2016090	NA	NA	NA	NA	NA	NA	NA	NA	NA	NA	NA	NA	NA	NA	NA	NA	NA	NA	NA
621	CP016287.1	circular	1254530	Bacteria	Proteobacteria	Alphaproteobacteria	Rhizobiales	Rhizobiaceae	Rhizobium	Rhizobium leguminosarum	Rhizobium leguminosarum strain Vaf10 plasmid unnamed1, complete sequence	NA	2012	Russia: North Osetia, Caucasus	taxon:384	NA	Vavilovia formosa	NA	NA	genomic DNA	Rhizobium leguminosarum	unnamed1	Vaf10	NA	NA	NA	NA	NA	NA	NA	NA	NA	NA	NA	NA	NA	NA	NA	NA	NA	NA	NA	NA	NA	NA	NA	NA	NA	NA
622	CP016288.1	circular	247808	Bacteria	Proteobacteria	Alphaproteobacteria	Rhizobiales	Rhizobiaceae	Rhizobium	Rhizobium leguminosarum	Rhizobium leguminosarum strain Vaf10 plasmid unnamed7, complete sequence	NA	2012	Russia: North Osetia, Caucasus	taxon:384	NA	Vavilovia formosa	NA	NA	genomic DNA	Rhizobium leguminosarum	unnamed7	Vaf10	NA	NA	NA	NA	NA	NA	NA	NA	NA	NA	NA	NA	NA	NA	NA	NA	NA	NA	NA	NA	NA	NA	NA	NA	NA	NA
623	CP016289.1	circular	622622	Bacteria	Proteobacteria	Alphaproteobacteria	Rhizobiales	Rhizobiaceae	Rhizobium	Rhizobium leguminosarum	Rhizobium leguminosarum strain Vaf10 plasmid unnamed2, complete sequence	NA	2012	Russia: North Osetia, Caucasus	taxon:384	NA	Vavilovia formosa	NA	NA	genomic DNA	Rhizobium leguminosarum	unnamed2	Vaf10	NA	NA	NA	NA	NA	NA	NA	NA	NA	NA	NA	NA	NA	NA	NA	NA	NA	NA	NA	NA	NA	NA	NA	NA	NA	NA
624	CP016290.1	circular	557598	Bacteria	Proteobacteria	Alphaproteobacteria	Rhizobiales	Rhizobiaceae	Rhizobium	Rhizobium leguminosarum	Rhizobium leguminosarum strain Vaf10 plasmid unnamed3, complete sequence	NA	2012	Russia: North Osetia, Caucasus	taxon:384	NA	Vavilovia formosa	NA	NA	genomic DNA	Rhizobium leguminosarum	unnamed3	Vaf10	NA	NA	NA	NA	NA	NA	NA	NA	NA	NA	NA	NA	NA	NA	NA	NA	NA	NA	NA	NA	NA	NA	NA	NA	NA	NA
625	CP016291.1	circular	265603	Bacteria	Proteobacteria	Alphaproteobacteria	Rhizobiales	Rhizobiaceae	Rhizobium	Rhizobium leguminosarum	Rhizobium leguminosarum strain Vaf10 plasmid unnamed6, complete sequence	NA	2012	Russia: North Osetia, Caucasus	taxon:384	NA	Vavilovia formosa	NA	NA	genomic DNA	Rhizobium leguminosarum	unnamed6	Vaf10	NA	NA	NA	NA	NA	NA	NA	NA	NA	NA	NA	NA	NA	NA	NA	NA	NA	NA	NA	NA	NA	NA	NA	NA	NA	NA
626	CP016292.1	circular	309378	Bacteria	Proteobacteria	Alphaproteobacteria	Rhizobiales	Rhizobiaceae	Rhizobium	Rhizobium leguminosarum	Rhizobium leguminosarum strain Vaf10 plasmid unnamed4, complete sequence	NA	2012	Russia: North Osetia, Caucasus	taxon:384	NA	Vavilovia formosa	NA	NA	genomic DNA	Rhizobium leguminosarum	unnamed4	Vaf10	NA	NA	NA	NA	NA	NA	NA	NA	NA	NA	NA	NA	NA	NA	NA	NA	NA	NA	NA	NA	NA	NA	NA	NA	NA	NA
627	CP016293.1	circular	274981	Bacteria	Proteobacteria	Alphaproteobacteria	Rhizobiales	Rhizobiaceae	Rhizobium	Rhizobium leguminosarum	Rhizobium leguminosarum strain Vaf10 plasmid unnamed5, complete sequence	NA	2012	Russia: North Osetia, Caucasus	taxon:384	NA	Vavilovia formosa	NA	NA	genomic DNA	Rhizobium leguminosarum	unnamed5	Vaf10	NA	NA	NA	NA	NA	NA	NA	NA	NA	NA	NA	NA	NA	NA	NA	NA	NA	NA	NA	NA	NA	NA	NA	NA	NA	NA
628	CP016334.1	circular	8188	Bacteria	Firmicutes	Clostridia	Clostridiales	Clostridiaceae	Clostridium	Clostridium butyricum	Clostridium butyricum strain TK520 plasmid, complete sequence	NA	2015	China	taxon:1492	NA	NA	feces	NA	genomic DNA	Clostridium butyricum	unnamed	TK520	NA	NA	NA	NA	NA	NA	NA	NA	NA	NA	NA	NA	NA	NA	NA	NA	NA	NA	NA	NA	NA	NA	NA	NA	NA	NA
629	CP016402.1	circular	57009	Bacteria	Proteobacteria	Gammaproteobacteria	Enterobacterales	Enterobacteriaceae	Klebsiella	Klebsiella pneumoniae	Klebsiella pneumoniae subsp. pneumoniae strain F77 plasmid pF77, complete sequence	Fujian Provincial Hospital	2014-09-23	China	taxon:72407	NA	Homo sapiens	bile	26.5 N 119.18000000000006 E	genomic DNA	Klebsiella pneumoniae subsp. pneumoniae	pF77	F77	NA	pneumoniae	NA	NA	NA	NA	NA	NA	NA	NA	NA	NA	NA	NA	NA	NA	NA	NA	NA	NA	NA	NA	NA	NA	NA	NA
630	CP016403.1	circular	105125	Bacteria	Proteobacteria	Gammaproteobacteria	Enterobacterales	Enterobacteriaceae	Klebsiella	Klebsiella pneumoniae	Klebsiella pneumoniae subsp. pneumoniae strain F5 plasmid pF5, complete sequence	Fujian Provincial Hospital	29-May-2014	China	taxon:72407	NA	Homo sapiens	Sputum	26.5 N 119.18000000000006 E	genomic DNA	Klebsiella pneumoniae subsp. pneumoniae	pF5	F5	NA	pneumoniae	NA	NA	NA	NA	NA	NA	NA	NA	NA	NA	NA	NA	NA	NA	NA	NA	NA	NA	NA	NA	NA	NA	NA	NA
631	CP016419.1	circular	7506	Bacteria	Chlamydiae	Chlamydiia	Chlamydiales	Chlamydiaceae	Chlamydia	Chlamydia trachomatis	Chlamydia trachomatis strain SB002739 plasmid unnamed1, complete sequence	Robert Butcher	2013-11-01	Solomon Islands: Temotu	taxon:813	NA	Homo sapiens	Right conjunctiva of a child with trachoma	NA	genomic DNA	Chlamydia trachomatis	unnamed1	SB002739	NA	NA	NA	NA	NA	NA	NA	NA	NA	NA	NA	NA	NA	NA	NA	NA	NA	NA	NA	NA	NA	NA	NA	NA	NA	NA
632	CP016691.1	circular	9735	Bacteria	Firmicutes	Bacilli	Lactobacillales	Streptococcaceae	Lactococcus	Lactococcus lactis	Lactococcus lactis subsp. lactis strain 184 plasmid p184A, complete sequence	University College Cork	2012	NA	taxon:1360	NA	NA	Dairy fermentation	NA	genomic DNA	Lactococcus lactis subsp. lactis	p184A	184	NA	lactis	NA	NA	NA	NA	NA	NA	NA	NA	NA	NA	NA	NA	NA	NA	NA	NA	NA	NA	NA	NA	NA	NA	NA	NA
633	CP016692.1	circular	5929	Bacteria	Firmicutes	Bacilli	Lactobacillales	Streptococcaceae	Lactococcus	Lactococcus lactis	Lactococcus lactis subsp. lactis strain 184 plasmid p184B, complete sequence	University College Cork	2012	NA	taxon:1360	NA	NA	Dairy fermentation	NA	genomic DNA	Lactococcus lactis subsp. lactis	p184B	184	NA	lactis	NA	NA	NA	NA	NA	NA	NA	NA	NA	NA	NA	NA	NA	NA	NA	NA	NA	NA	NA	NA	NA	NA	NA	NA
634	CP016693.1	circular	10488	Bacteria	Firmicutes	Bacilli	Lactobacillales	Streptococcaceae	Lactococcus	Lactococcus lactis	Lactococcus lactis subsp. lactis strain 184 plasmid p184C, complete sequence	University College Cork	2012	NA	taxon:1360	NA	NA	Dairy fermentation	NA	genomic DNA	Lactococcus lactis subsp. lactis	p184C	184	NA	lactis	NA	NA	NA	NA	NA	NA	NA	NA	NA	NA	NA	NA	NA	NA	NA	NA	NA	NA	NA	NA	NA	NA	NA	NA
635	CP016703.1	circular	2120	Bacteria	Firmicutes	Bacilli	Lactobacillales	Streptococcaceae	Lactococcus	Lactococcus lactis	Lactococcus lactis subsp. lactis strain C10 plasmid pC10A, complete sequence	University College Cork	2012	NA	taxon:1360	NA	NA	Dairy fermentation	NA	genomic DNA	Lactococcus lactis subsp. lactis	pC10A	C10	NA	lactis	NA	NA	NA	NA	NA	NA	NA	NA	NA	NA	NA	NA	NA	NA	NA	NA	NA	NA	NA	NA	NA	NA	NA	NA
636	CP016763.1	circular	127005	Bacteria	Proteobacteria	Gammaproteobacteria	Enterobacterales	Enterobacteriaceae	Citrobacter	Citrobacter freundii	Citrobacter freundii strain B38 plasmid pOZ172, complete sequence	NA	Dec-1998	China: Guangzhou	taxon:546	NA	Homo sapiens	Sun Yat-sen Memorial Hospital	23.11 N 113.26 E	genomic DNA	Citrobacter freundii	pOZ172	B38	NA	NA	NA	NA	NA	NA	NA	NA	NA	NA	NA	NA	NA	NA	NA	NA	NA	NA	NA	NA	NA	NA	NA	NA	NA	NA
637	CP016838.1	circular	341373	Bacteria	Proteobacteria	Gammaproteobacteria	Enterobacterales	Enterobacteriaceae	Salmonella	Salmonella enterica	Salmonella enterica subsp. enterica serovar Senftenberg strain 775W plasmid pSSE-ATCC-43845, complete sequence	E. Beckler	1941	USA: Massachusetts	taxon:28150	NA	NA	Chinese egg powder	NA	genomic DNA	Salmonella enterica subsp. enterica serovar Senftenberg	pSSE-ATCC-43845	775W	Senftenberg	enterica	NA	NA	NA	NA	ATCC:43845	NA	NA	NA	NA	NA	NA	NA	NA	NA	NA	NA	NA	NA	NA	NA	NA	NA	NA	NA
638	CP016920.1	circular	6139	Bacteria	Proteobacteria	Gammaproteobacteria	Enterobacterales	Enterobacteriaceae	Klebsiella	Klebsiella pneumoniae	Klebsiella pneumoniae isolate 11 plasmid pColKP3_DHQP1300920, complete sequence	PA State Health Department	2013-03-14	USA: Pennsylvania	taxon:573	NA	Homo sapiens	Urine	NA	genomic DNA	Klebsiella pneumoniae	pColKP3_DHQP1300920	NA	NA	NA	NA	11	NA	NA	NA	NA	NA	NA	NA	NA	NA	NA	NA	NA	NA	NA	NA	NA	NA	NA	NA	NA	NA	NA
639	CP016921.1	circular	283369	Bacteria	Proteobacteria	Gammaproteobacteria	Enterobacterales	Enterobacteriaceae	Klebsiella	Klebsiella pneumoniae	Klebsiella pneumoniae isolate 11 plasmid pIncHI1B_DHQP1300920, complete sequence	PA State Health Department	2013-03-14	USA: Pennsylvania	taxon:573	NA	Homo sapiens	Urine	NA	genomic DNA	Klebsiella pneumoniae	pIncHI1B_DHQP1300920	NA	NA	NA	NA	11	NA	NA	NA	NA	NA	NA	NA	NA	NA	NA	NA	NA	NA	NA	NA	NA	NA	NA	NA	NA	NA	NA
640	CP016924.1	circular	111539	Bacteria	Proteobacteria	Gammaproteobacteria	Enterobacterales	Enterobacteriaceae	Klebsiella	Klebsiella pneumoniae	Klebsiella pneumoniae isolate 23 plasmid pIncFIB_DHQP1400954, complete sequence	MN State Health Department	2014-03-08	USA: Minnesota	taxon:573	NA	Homo sapiens	Tracheal Aspirate	NA	genomic DNA	Klebsiella pneumoniae	pIncFIB_DHQP1400954	NA	NA	NA	NA	23	NA	NA	NA	NA	NA	NA	NA	NA	NA	NA	NA	NA	NA	NA	NA	NA	NA	NA	NA	NA	NA	NA
641	CP016969.1	circular	22987	Bacteria	Firmicutes	Bacilli	Bacillales	Staphylococcaceae	Staphylococcus	Staphylococcus epidermidis	Staphylococcus epidermidis strain DAR1907 plasmid unnamed1, complete sequence	D. Ashley Robinson	05-May-2007	USA: New York	taxon:1282	NA	Homo sapiens	Blood	41.1290213474951 N 74.190673828125 W	genomic DNA	Staphylococcus epidermidis	unnamed1	DAR1907	NA	NA	NA	NA	NA	NA	NA	NA	NA	NA	NA	NA	NA	NA	NA	NA	NA	NA	NA	NA	NA	NA	NA	NA	NA	NA
642	CP016970.1	circular	28575	Bacteria	Firmicutes	Bacilli	Bacillales	Staphylococcaceae	Staphylococcus	Staphylococcus epidermidis	Staphylococcus epidermidis strain DAR1907 plasmid unnamed2, complete sequence	D. Ashley Robinson	05-May-2007	USA: New York	taxon:1282	NA	Homo sapiens	Blood	41.1290213474951 N 74.190673828125 W	genomic DNA	Staphylococcus epidermidis	unnamed2	DAR1907	NA	NA	NA	NA	NA	NA	NA	NA	NA	NA	NA	NA	NA	NA	NA	NA	NA	NA	NA	NA	NA	NA	NA	NA	NA	NA
643	CP016971.1	circular	13552	Bacteria	Firmicutes	Bacilli	Bacillales	Staphylococcaceae	Staphylococcus	Staphylococcus epidermidis	Staphylococcus epidermidis strain DAR1907 plasmid unnamed3, complete sequence	D. Ashley Robinson	05-May-2007	USA: New York	taxon:1282	NA	Homo sapiens	Blood	41.1290213474951 N 74.190673828125 W	genomic DNA	Staphylococcus epidermidis	unnamed3	DAR1907	NA	NA	NA	NA	NA	NA	NA	NA	NA	NA	NA	NA	NA	NA	NA	NA	NA	NA	NA	NA	NA	NA	NA	NA	NA	NA
644	CP017095.2	circular	32660	Bacteria	Firmicutes	Bacilli	Bacillales	Staphylococcaceae	Staphylococcus	Staphylococcus aureus	Staphylococcus aureus subsp. aureus strain 2148.C01 plasmid p2148.C01b, complete sequence	Uniformed Services University	2011-10-11	USA: Ft. Benning, Georgia	taxon:46170	NA	Homo sapiens	purulent absess from military trainee	32.3913 N 84.8229 W	genomic DNA	Staphylococcus aureus subsp. aureus	p2148.C01b	2148.C01	NA	aureus	NA	NA	NA	NA	NA	NA	NA	NA	NA	NA	NA	NA	NA	NA	NA	NA	NA	NA	NA	NA	NA	NA	NA	NA
645	CP017309.1	circular	75753	Bacteria	Proteobacteria	Gammaproteobacteria	Xanthomonadales	Xanthomonadaceae	Xanthomonas	Xanthomonas campestris	Xanthomonas campestris pv. campestris str. CN03 plasmid unnamed, complete sequence	NA	2002	China	taxon:1358004	NA	Brassica rapa subsp. pekinensis	Brassica rapa subsp. pekinensis	NA	genomic DNA	Xanthomonas campestris pv. campestris str. CN03	unnamed	CN03	NA	NA	NA	NA	pathovar: campestris	NA	NA	NA	NA	NA	NA	NA	NA	NA	NA	NA	NA	NA	NA	NA	NA	NA	NA	NA	NA	NA
646	CP017416.1	circular	44917	Bacteria	Proteobacteria	Epsilonproteobacteria	Campylobacterales	Campylobacteraceae	Campylobacter	Campylobacter jejuni	Campylobacter jejuni strain MTVDSCj07 plasmid pMTVDSCj07-1, complete sequence	ME Taveirne	2013-10-01	USA: Michigan	taxon:197	NA	NA	Chicken Cecal Content	42.33 N 83.88 W	genomic DNA	Campylobacter jejuni	pMTVDSCj07-1	MTVDSCj07	NA	NA	NA	NA	NA	NA	NA	NA	NA	NA	NA	NA	NA	NA	NA	NA	NA	NA	NA	NA	NA	NA	NA	NA	NA	NA
647	CP017417.1	circular	73372	Bacteria	Proteobacteria	Epsilonproteobacteria	Campylobacterales	Campylobacteraceae	Campylobacter	Campylobacter jejuni	Campylobacter jejuni strain MTVDSCj13 plasmid pMTVDSCj13-2, complete sequence	ME Taveirne	2013-10-01	USA: Michigan	taxon:197	NA	NA	Chicken Cecal Content	42.33 N 83.88 W	genomic DNA	Campylobacter jejuni	pMTVDSCj13-2	MTVDSCj13	NA	NA	NA	NA	NA	NA	NA	NA	NA	NA	NA	NA	NA	NA	NA	NA	NA	NA	NA	NA	NA	NA	NA	NA	NA	NA
648	CP017418.1	circular	44687	Bacteria	Proteobacteria	Epsilonproteobacteria	Campylobacterales	Campylobacteraceae	Campylobacter	Campylobacter jejuni	Campylobacter jejuni strain MTVDSCj13 plasmid pMTVDSCj13-1, complete sequence	ME Taveirne	2013-10-01	USA: Michigan	taxon:197	NA	NA	Chicken Cecal Content	42.33 N 83.88 W	genomic DNA	Campylobacter jejuni	pMTVDSCj13-1	MTVDSCj13	NA	NA	NA	NA	NA	NA	NA	NA	NA	NA	NA	NA	NA	NA	NA	NA	NA	NA	NA	NA	NA	NA	NA	NA	NA	NA
649	CP017419.1	circular	42686	Bacteria	Proteobacteria	Epsilonproteobacteria	Campylobacterales	Campylobacteraceae	Campylobacter	Campylobacter jejuni	Campylobacter jejuni strain MTVDSCj16 plasmid pMTVDSCj16-1, complete sequence	ME Taveirne	2013-10-01	USA: Michigan	taxon:197	NA	NA	Chicken Cecal Content	42.33 N 83.88 W	genomic DNA	Campylobacter jejuni	pMTVDSCj16-1	MTVDSCj16	NA	NA	NA	NA	NA	NA	NA	NA	NA	NA	NA	NA	NA	NA	NA	NA	NA	NA	NA	NA	NA	NA	NA	NA	NA	NA
650	CP017618.1	circular	93055	Bacteria	Proteobacteria	Gammaproteobacteria	Enterobacterales	Enterobacteriaceae	Salmonella	Salmonella enterica	Salmonella enterica subsp. enterica serovar Typhimurium strain 22495 plasmid unnamed1, complete sequence	NA	2007	Canada	taxon:90371	NA	gull	NA	NA	genomic DNA	Salmonella enterica subsp. enterica serovar Typhimurium	unnamed1	22495	Typhimurium	enterica	NA	NA	virulence plasmid	NA	NA	NA	NA	NA	NA	NA	NA	NA	NA	NA	NA	NA	NA	NA	NA	NA	NA	NA	NA	NA
651	CP017619.1	circular	2097	Bacteria	Proteobacteria	Gammaproteobacteria	Enterobacterales	Enterobacteriaceae	Salmonella	Salmonella enterica	Salmonella enterica subsp. enterica serovar Typhimurium strain 22495 plasmid unnamed2, complete sequence	NA	2007	Canada	taxon:90371	NA	gull	NA	NA	genomic DNA	Salmonella enterica subsp. enterica serovar Typhimurium	unnamed2	22495	Typhimurium	enterica	NA	NA	small plasmid	NA	NA	NA	NA	NA	NA	NA	NA	NA	NA	NA	NA	NA	NA	NA	NA	NA	NA	NA	NA	NA
652	CP017672.1	circular	108417	Bacteria	Proteobacteria	Gammaproteobacteria	Enterobacterales	Morganellaceae	Providencia	Providencia rettgeri	Providencia rettgeri strain RB151 plasmid pRB151-NDM, complete sequence	NA	NA	NA	taxon:587	NA	NA	NA	NA	genomic DNA	Providencia rettgeri	pRB151-NDM	RB151	NA	NA	NA	NA	NA	NA	NA	NA	NA	NA	NA	NA	NA	NA	NA	NA	NA	NA	NA	NA	NA	NA	NA	NA	NA	NA
653	CP017835.1	linear	42228	Bacteria	Proteobacteria	Oligoflexia	Silvanigrellales	Silvanigrellaceae	Silvanigrella	Silvanigrella aquatica	Silvanigrella aquatica strain MWH-Nonnen-W8red plasmid pNonnen1, complete sequence	NA	2008-07-28	Germany: Black Forest (Schwarzwald), Baden-Wuertemberg	taxon:1915309	NA	NA	freshwater	NA	genomic DNA	Silvanigrella aquatica	pNonnen1	MWH-Nonnen-W8red	NA	NA	NA	NA	NA	NA	NA	NA	type strain of Silvanigrella aquatica	NA	927 m	NA	NA	NA	NA	NA	NA	NA	NA	NA	NA	NA	NA	NA	NA	NA
654	CP017836.1	linear	36988	Bacteria	Proteobacteria	Oligoflexia	Silvanigrellales	Silvanigrellaceae	Silvanigrella	Silvanigrella aquatica	Silvanigrella aquatica strain MWH-Nonnen-W8red plasmid pNonnen2, complete sequence	NA	2008-07-28	Germany: Black Forest (Schwarzwald), Baden-Wuertemberg	taxon:1915309	NA	NA	freshwater	NA	genomic DNA	Silvanigrella aquatica	pNonnen2	MWH-Nonnen-W8red	NA	NA	NA	NA	NA	NA	NA	NA	type strain of Silvanigrella aquatica	NA	927 m	NA	NA	NA	NA	NA	NA	NA	NA	NA	NA	NA	NA	NA	NA	NA
655	CP017887.1	circular	371069	Bacteria	Proteobacteria	Gammaproteobacteria	Pseudomonadales	Pseudomonadaceae	Pseudomonas	Pseudomonas frederiksbergensis	Pseudomonas frederiksbergensis strain ERDD5:01 plasmid unnamed1, complete sequence	Rakshak Kumar	2015-09-28	India: West Sikkim	taxon:104087	NA	NA	glacial stream	27.34 N 88.06 E	genomic DNA	Pseudomonas frederiksbergensis	unnamed1	ERDD5:01	NA	NA	NA	NA	NA	Rakshak Kumar	MCC:2990	NA	NA	NA	4718 m	NA	NA	NA	NA	NA	NA	NA	NA	NA	NA	NA	NA	NA	NA	NA
656	CP017893.1	circular	280614	Bacteria	Proteobacteria	Gammaproteobacteria	Vibrionales	Vibrionaceae	Vibrio	Vibrio alginolyticus	Vibrio alginolyticus strain K04M1 plasmid pL280, complete sequence	NA	May-2011	Germany	taxon:663	NA	Syngnathus typhle	Kiel Fjord	NA	genomic DNA	Vibrio alginolyticus	pL280	K04M1	NA	NA	NA	NA	NA	NA	NA	NA	NA	NA	NA	NA	NA	NA	NA	NA	NA	NA	NA	NA	NA	NA	NA	NA	NA	NA
657	CP017894.1	circular	19690	Bacteria	Proteobacteria	Gammaproteobacteria	Vibrionales	Vibrionaceae	Vibrio	Vibrio alginolyticus	Vibrio alginolyticus strain K04M1 plasmid pL19, complete sequence	NA	May-2011	Germany	taxon:663	NA	Syngnathus typhle	Kiel Fjord	NA	genomic DNA	Vibrio alginolyticus	pL19	K04M1	NA	NA	NA	NA	NA	NA	NA	NA	NA	NA	NA	NA	NA	NA	NA	NA	NA	NA	NA	NA	NA	NA	NA	NA	NA	NA
658	CP017904.1	circular	289065	Bacteria	Proteobacteria	Gammaproteobacteria	Vibrionales	Vibrionaceae	Vibrio	Vibrio alginolyticus	Vibrio alginolyticus strain K05K4 plasmid pL289, complete sequence	NA	May-2011	Germany	taxon:663	NA	Syngnathus typhle	Kiel Fjord	NA	genomic DNA	Vibrio alginolyticus	pL289	K05K4	NA	NA	NA	NA	NA	NA	NA	NA	NA	NA	NA	NA	NA	NA	NA	NA	NA	NA	NA	NA	NA	NA	NA	NA	NA	NA
659	CP017929.1	circular	113105	Bacteria	Proteobacteria	Gammaproteobacteria	Enterobacterales	Enterobacteriaceae	Klebsiella	Klebsiella oxytoca	Klebsiella oxytoca strain CAV1015 plasmid pKPC_UVA02, complete sequence	Clinical Microbiology University of Virginia Health System	2007-08	USA:Virginia	taxon:571	NA	Homo sapiens	Blood	38.14 N 78.45 W	genomic DNA	Klebsiella oxytoca	pKPC_UVA02	CAV1015	NA	NA	NA	NA	NA	NA	NA	NA	NA	NA	NA	NA	NA	NA	NA	NA	NA	NA	NA	NA	NA	NA	NA	NA	NA	NA
660	CP017991.1	circular	144025	Bacteria	Proteobacteria	Gammaproteobacteria	Enterobacterales	Enterobacteriaceae	Enterobacter	Enterobacter cloacae complex sp. ECNIH7	Enterobacter cloacae complex sp. ECNIH7 plasmid pENT-1ac, complete sequence	NA	2014	USA	taxon:1915310	NA	NA	NA	38.9847 N 77.0947 W	genomic DNA	Enterobacter cloacae complex sp. ECNIH7	pENT-1ac	ECNIH7	NA	NA	NA	NA	NA	NA	NA	NA	NA	NA	NA	NA	NA	NA	NA	NA	NA	NA	NA	NA	NA	NA	NA	NA	NA	NA
661	CP018141.1	circular	12170	Bacteria	Proteobacteria	Gammaproteobacteria	Pseudomonadales	Moraxellaceae	Acinetobacter	Acinetobacter larvae	Acinetobacter sp. BRTC-1 plasmid pRW1, complete sequence	NA	Dec-2015	China	taxon:1789224	NA	Omphisa fuscidentalis Hampson	NA	21.55 N 100.45 E	genomic DNA	Acinetobacter larvae	pRW1	BRTC-1	NA	NA	NA	NA	NA	NA	NA	NA	NA	NA	NA	NA	NA	NA	NA	NA	NA	NA	NA	NA	NA	NA	NA	NA	NA	NA
662	CP018142.1	circular	8455	Bacteria	Proteobacteria	Gammaproteobacteria	Pseudomonadales	Moraxellaceae	Acinetobacter	Acinetobacter larvae	Acinetobacter sp. BRTC-1 plasmid pRW2, complete sequence	NA	Dec-2015	China	taxon:1789224	NA	Omphisa fuscidentalis Hampson	NA	21.55 N 100.45 E	genomic DNA	Acinetobacter larvae	pRW2	BRTC-1	NA	NA	NA	NA	NA	NA	NA	NA	NA	NA	NA	NA	NA	NA	NA	NA	NA	NA	NA	NA	NA	NA	NA	NA	NA	NA
663	CP018310.1	circular	70734	Bacteria	Proteobacteria	Gammaproteobacteria	Vibrionales	Vibrionaceae	Vibrio	Vibrio mediterranei	Vibrio mediterranei strain QT6D1 plasmid unnamed, complete sequence	Xiaolei Wang	2015-10	China: East China Sea	taxon:689	NA	NA	bottom water	26.8957 N 122.0051 E	genomic DNA	Vibrio mediterranei	unnamed	QT6D1	NA	NA	NA	NA	NA	Xiaolei Wang	NA	NA	NA	NA	NA	NA	NA	NA	NA	NA	NA	NA	NA	NA	NA	NA	NA	NA	NA	NA
664	CP018652.1	circular	200045	Bacteria	Proteobacteria	Gammaproteobacteria	Enterobacterales	Enterobacteriaceae	Salmonella	Salmonella enterica	Salmonella enterica subsp. enterica serovar Enteritidis strain 81-1705 plasmid pSE81-1705-1, complete sequence	NA	1981	USA	taxon:149539	NA	NA	Human	NA	genomic DNA	Salmonella enterica subsp. enterica serovar Enteritidis	pSE81-1705-1	81-1705	Enteritidis	enterica	NA	NA	NA	NA	NA	NA	NA	NA	NA	NA	NA	NA	NA	NA	NA	NA	NA	NA	NA	NA	NA	NA	NA	NA
665	CP018767.1	circular	26856	Bacteria	Firmicutes	Bacilli	Bacillales	Staphylococcaceae	Staphylococcus	Staphylococcus aureus	Staphylococcus aureus subsp. aureus strain UCI62 plasmid pUCI62, complete sequence	NA	2010	USA: California	taxon:46170	NA	Homo sapiens	Human_no contact with swine	NA	genomic DNA	Staphylococcus aureus subsp. aureus	pUCI62	UCI62	NA	aureus	NA	NA	NA	NA	NA	NA	NA	NA	NA	NA	NA	NA	NA	NA	NA	NA	NA	NA	NA	NA	NA	NA	NA	NA
666	CP019078.1	circular	70987	Bacteria	Proteobacteria	Gammaproteobacteria	Enterobacterales	Enterobacteriaceae	Klebsiella	Klebsiella pneumoniae	Klebsiella pneumoniae strain DT1 plasmid pDT1, complete sequence	NA	2015-10-22	Germany: Hamburg	taxon:573	NA	Homo sapiens	central venous catheter	NA	genomic DNA	Klebsiella pneumoniae	pDT1	DT1	NA	NA	NA	NA	NA	NA	NA	NA	NA	NA	NA	NA	NA	NA	NA	NA	NA	NA	NA	NA	NA	NA	NA	NA	NA	NA
667	CP019195.1	circular	341263	Bacteria	Proteobacteria	Gammaproteobacteria	Enterobacterales	Enterobacteriaceae	Salmonella	Salmonella enterica	Salmonella enterica subsp. enterica serovar Senftenberg str. ATCC 43845 plasmid pATCC43845, complete sequence	FDA	NA	NA	taxon:930772	NA	NA	NA	NA	genomic DNA	Salmonella enterica subsp. enterica serovar Senftenberg str. ATCC 43845	pATCC43845	ATCC 43845	Senftenberg	enterica	NA	NA	NA	NA	ATCC:43845	NA	NA	NA	NA	NA	NA	NA	NA	NA	NA	NA	NA	NA	NA	NA	NA	NA	NA	NA
668	CP019349.1	circular	10536	Bacteria	Firmicutes	Bacilli	Lactobacillales	Lactobacillaceae	Lactobacillus	Lactobacillus plantarum	Lactobacillus plantarum strain KLDS1.0391 plasmid unnamed1, complete sequence	NA	2002-10-01	China	taxon:1590	NA	NA	NA	NA	genomic DNA	Lactobacillus plantarum	unnamed1	KLDS1.0391	NA	NA	NA	NA	NA	NA	NA	NA	NA	NA	NA	NA	NA	NA	NA	NA	NA	NA	NA	NA	NA	NA	NA	NA	NA	NA
669	CP019350.1	circular	3152	Bacteria	Firmicutes	Bacilli	Lactobacillales	Lactobacillaceae	Lactobacillus	Lactobacillus plantarum	Lactobacillus plantarum strain KLDS1.0391 plasmid unnamed2, complete sequence	NA	2002-10-01	China	taxon:1590	NA	NA	NA	NA	genomic DNA	Lactobacillus plantarum	unnamed2	KLDS1.0391	NA	NA	NA	NA	NA	NA	NA	NA	NA	NA	NA	NA	NA	NA	NA	NA	NA	NA	NA	NA	NA	NA	NA	NA	NA	NA
670	CP019351.1	circular	10614	Bacteria	Firmicutes	Bacilli	Lactobacillales	Lactobacillaceae	Lactobacillus	Lactobacillus plantarum	Lactobacillus plantarum strain KLDS1.0391 plasmid unnamed3, complete sequence	NA	2002-10-01	China	taxon:1590	NA	NA	NA	NA	genomic DNA	Lactobacillus plantarum	unnamed3	KLDS1.0391	NA	NA	NA	NA	NA	NA	NA	NA	NA	NA	NA	NA	NA	NA	NA	NA	NA	NA	NA	NA	NA	NA	NA	NA	NA	NA
671	CP019561.1	circular	148529	Bacteria	Proteobacteria	Gammaproteobacteria	Enterobacterales	Enterobacteriaceae	Escherichia	Escherichia coli	Escherichia coli strain KSC1031 plasmid pMRGN1031, complete sequence	NA	2014-04-29	USA	taxon:562	NA	NA	porcine	NA	genomic DNA	Escherichia coli	pMRGN1031	KSC1031	NA	NA	NA	NA	NA	NA	NA	NA	NA	NA	NA	NA	NA	NA	NA	NA	NA	NA	NA	NA	NA	NA	NA	NA	NA	NA
672	CP019598.1	circular	29492	Bacteria	Firmicutes	Bacilli	Bacillales	Staphylococcaceae	Staphylococcus	Staphylococcus cohnii	Staphylococcus cohnii strain SNUDS-2 plasmid pSC-SNUDS-2-1, complete sequence	Seoul National University	2011-03-01	South Korea: Chungnam	taxon:29382	NA	duck with tremor	NA	36.83 N 126.98 E	genomic DNA	Staphylococcus cohnii	pSC-SNUDS-2-1	SNUDS-2	NA	NA	NA	NA	NA	NA	NA	NA	NA	NA	NA	NA	NA	NA	NA	NA	NA	NA	NA	NA	NA	NA	NA	NA	NA	NA
673	CP019599.1	circular	10332	Bacteria	Firmicutes	Bacilli	Bacillales	Staphylococcaceae	Staphylococcus	Staphylococcus cohnii	Staphylococcus cohnii strain SNUDS-2 plasmid pSC-SNUDS-2-2, complete sequence	Seoul National University	2011-03-01	South Korea: Chungnam	taxon:29382	NA	duck with tremor	NA	36.83 N 126.98 E	genomic DNA	Staphylococcus cohnii	pSC-SNUDS-2-2	SNUDS-2	NA	NA	NA	NA	NA	NA	NA	NA	NA	NA	NA	NA	NA	NA	NA	NA	NA	NA	NA	NA	NA	NA	NA	NA	NA	NA
674	CP019647.1	circular	275801	Bacteria	Proteobacteria	Gammaproteobacteria	Enterobacterales	Enterobacteriaceae	Salmonella	Salmonella enterica	Salmonella enterica subsp. enterica serovar Typhimurium strain TW-Stm6 plasmid pSTM6-275, complete sequence	Tom Weaver	2014-06-19	Australia	taxon:90371	NA	Sus scrofa domesticus	pooled feces	NA	genomic DNA	Salmonella enterica subsp. enterica serovar Typhimurium	pSTM6-275	TW-Stm6	Typhimurium	enterica	NA	NA	NA	NA	NA	4,5,12:i:-	NA	NA	NA	NA	NA	NA	NA	NA	NA	NA	NA	NA	NA	NA	NA	NA	NA	NA
675	CP019690.1	circular	59559	Bacteria	Proteobacteria	Gammaproteobacteria	Enterobacterales	Enterobacteriaceae	Shigella	Shigella sonnei	Shigella sonnei strain 75/02 plasmid p75-02_2, complete sequence	National Center for Epidemiology, Budapest, Hungary	2002	Hungary: Halimba	taxon:624	NA	Homo sapiens	feces	47.0335 N 17.5364 E	genomic DNA	Shigella sonnei	p75-02_2	75/02	NA	NA	NA	NA	NA	NA	NA	NA	NA	NA	NA	NA	NA	NA	NA	NA	NA	NA	NA	NA	NA	NA	NA	NA	NA	NA
676	CP019691.1	circular	40443	Bacteria	Proteobacteria	Gammaproteobacteria	Enterobacterales	Enterobacteriaceae	Shigella	Shigella sonnei	Shigella sonnei strain 75/02 plasmid p75-02_3, complete sequence	National Center for Epidemiology, Budapest, Hungary	2002	Hungary: Halimba	taxon:624	NA	Homo sapiens	feces	47.0335 N 17.5364 E	genomic DNA	Shigella sonnei	p75-02_3	75/02	NA	NA	NA	NA	NA	NA	NA	NA	NA	NA	NA	NA	NA	NA	NA	NA	NA	NA	NA	NA	NA	NA	NA	NA	NA	NA
677	CP019692.1	circular	6341	Bacteria	Proteobacteria	Gammaproteobacteria	Enterobacterales	Enterobacteriaceae	Shigella	Shigella sonnei	Shigella sonnei strain 75/02 plasmid p75-02_4, complete sequence	National Center for Epidemiology, Budapest, Hungary	2002	Hungary: Halimba	taxon:624	NA	Homo sapiens	feces	47.0335 N 17.5364 E	genomic DNA	Shigella sonnei	p75-02_4	75/02	NA	NA	NA	NA	NA	NA	NA	NA	NA	NA	NA	NA	NA	NA	NA	NA	NA	NA	NA	NA	NA	NA	NA	NA	NA	NA
678	CP019693.1	circular	5114	Bacteria	Proteobacteria	Gammaproteobacteria	Enterobacterales	Enterobacteriaceae	Shigella	Shigella sonnei	Shigella sonnei strain 75/02 plasmid p75-02_5, complete sequence	National Center for Epidemiology, Budapest, Hungary	2002	Hungary: Halimba	taxon:624	NA	Homo sapiens	feces	47.0335 N 17.5364 E	genomic DNA	Shigella sonnei	p75-02_5	75/02	NA	NA	NA	NA	NA	NA	NA	NA	NA	NA	NA	NA	NA	NA	NA	NA	NA	NA	NA	NA	NA	NA	NA	NA	NA	NA
679	CP019694.1	circular	3619	Bacteria	Proteobacteria	Gammaproteobacteria	Enterobacterales	Enterobacteriaceae	Shigella	Shigella sonnei	Shigella sonnei strain 75/02 plasmid p75-02_6, complete sequence	National Center for Epidemiology, Budapest, Hungary	2002	Hungary: Halimba	taxon:624	NA	Homo sapiens	feces	47.0335 N 17.5364 E	genomic DNA	Shigella sonnei	p75-02_6	75/02	NA	NA	NA	NA	NA	NA	NA	NA	NA	NA	NA	NA	NA	NA	NA	NA	NA	NA	NA	NA	NA	NA	NA	NA	NA	NA
680	CP019695.1	circular	2690	Bacteria	Proteobacteria	Gammaproteobacteria	Enterobacterales	Enterobacteriaceae	Shigella	Shigella sonnei	Shigella sonnei strain 75/02 plasmid p75-02_7, complete sequence	National Center for Epidemiology, Budapest, Hungary	2002	Hungary: Halimba	taxon:624	NA	Homo sapiens	feces	47.0335 N 17.5364 E	genomic DNA	Shigella sonnei	p75-02_7	75/02	NA	NA	NA	NA	NA	NA	NA	NA	NA	NA	NA	NA	NA	NA	NA	NA	NA	NA	NA	NA	NA	NA	NA	NA	NA	NA
681	CP019696.1	circular	214565	Bacteria	Proteobacteria	Gammaproteobacteria	Enterobacterales	Enterobacteriaceae	Shigella	Shigella sonnei	Shigella sonnei strain 75/02 plasmid pInv_75_02_1, complete sequence	National Center for Epidemiology, Budapest, Hungary	2002	Hungary: Halimba	taxon:624	NA	Homo sapiens	feces	47.0335 N 17.5364 E	genomic DNA	Shigella sonnei	pInv_75_02_1	75/02	NA	NA	NA	NA	NA	NA	NA	NA	NA	NA	NA	NA	NA	NA	NA	NA	NA	NA	NA	NA	NA	NA	NA	NA	NA	NA
682	CP019709.1	circular	96196	Bacteria	Proteobacteria	Gammaproteobacteria	Enterobacterales	Yersiniaceae	Yersinia	Yersinia pestis	Yersinia pestis strain 195/P plasmid pMT1, complete sequence	NA	2015-12-08	NA	taxon:632	NA	NA	lab strain	NA	genomic DNA	Yersinia pestis	pMT1	195/P	NA	NA	NA	NA	NA	NA	NA	NA	NA	NA	NA	NA	NA	NA	NA	NA	NA	NA	NA	NA	NA	NA	NA	NA	NA	NA
683	CP019710.1	circular	69706	Bacteria	Proteobacteria	Gammaproteobacteria	Enterobacterales	Yersiniaceae	Yersinia	Yersinia pestis	Yersinia pestis strain 195/P plasmid pCD1, complete sequence	NA	2015-12-08	NA	taxon:632	NA	NA	lab strain	NA	genomic DNA	Yersinia pestis	pCD1	195/P	NA	NA	NA	NA	NA	NA	NA	NA	NA	NA	NA	NA	NA	NA	NA	NA	NA	NA	NA	NA	NA	NA	NA	NA	NA	NA
684	CP019711.1	circular	9605	Bacteria	Proteobacteria	Gammaproteobacteria	Enterobacterales	Yersiniaceae	Yersinia	Yersinia pestis	Yersinia pestis strain 195/P plasmid pPCP1, complete sequence	NA	2015-12-08	NA	taxon:632	NA	NA	lab strain	NA	genomic DNA	Yersinia pestis	pPCP1	195/P	NA	NA	NA	NA	NA	NA	NA	NA	NA	NA	NA	NA	NA	NA	NA	NA	NA	NA	NA	NA	NA	NA	NA	NA	NA	NA
685	CP019727.1	circular	180858	Bacteria	Firmicutes	Bacilli	Bacillales	Bacillaceae	Bacillus	Bacillus anthracis	Bacillus anthracis strain Sterne 34F2 plasmid pXO1, complete sequence	NA	2015-11-17	NA	taxon:1392	NA	NA	lab strain	NA	genomic DNA	Bacillus anthracis	pXO1	Sterne 34F2	NA	NA	NA	NA	NA	NA	NA	NA	NA	NA	NA	NA	NA	NA	NA	NA	NA	NA	NA	NA	NA	NA	NA	NA	NA	NA
686	CP019890.1	circular	124759	Bacteria	Proteobacteria	Gammaproteobacteria	Enterobacterales	Enterobacteriaceae	Enterobacter	Enterobacter cloacae	Enterobacter cloacae strain FRM plasmid unnamed1, complete sequence	NA	2008-10-30	China	taxon:550	NA	NA	high concentration of fluoride	NA	genomic DNA	Enterobacter cloacae	unnamed1	FRM	NA	NA	NA	NA	NA	NA	NA	NA	NA	NA	NA	NA	NA	NA	NA	NA	NA	NA	NA	NA	NA	NA	NA	NA	NA	NA
687	CP019891.1	circular	112190	Bacteria	Proteobacteria	Gammaproteobacteria	Enterobacterales	Enterobacteriaceae	Enterobacter	Enterobacter cloacae	Enterobacter cloacae strain FRM plasmid unnamed2, complete sequence	NA	2008-10-30	China	taxon:550	NA	NA	high concentration of fluoride	NA	genomic DNA	Enterobacter cloacae	unnamed2	FRM	NA	NA	NA	NA	NA	NA	NA	NA	NA	NA	NA	NA	NA	NA	NA	NA	NA	NA	NA	NA	NA	NA	NA	NA	NA	NA
688	CP019895.1	circular	3910	Bacteria	Proteobacteria	Gammaproteobacteria	Enterobacterales	Enterobacteriaceae	Salmonella	Salmonella enterica	Salmonella enterica subsp. enterica serovar Typhimurium str. USDA-ARS-USMARC-1899 plasmid pSTY2-1899, complete sequence	NA	May-2007	USA: United States BIFSCo Region 1	taxon:1454639	NA	NA	ground beef	NA	genomic DNA	Salmonella enterica subsp. enterica serovar Typhimurium str. USDA-ARS-USMARC-1899	pSTY2-1899	USDA-ARS-USMARC-1899	Typhimurium	enterica	NA	NA	NA	NA	NA	NA	NA	NA	NA	NA	NA	NA	NA	NA	NA	NA	NA	NA	NA	NA	NA	NA	NA	NA
689	CP019896.1	circular	3904	Bacteria	Proteobacteria	Gammaproteobacteria	Enterobacterales	Enterobacteriaceae	Salmonella	Salmonella enterica	Salmonella enterica subsp. enterica serovar Anatum str. USDA-ARS-USMARC-1677 isolate SAN222 plasmid pSAN1-1677, complete sequence	USMARC	2005-07-01	USA: BIFSCo Region 6	taxon:1454588	NA	Bovine	ground beef	NA	genomic DNA	Salmonella enterica subsp. enterica serovar Anatum str. USDA-ARS-USMARC-1677	pSAN1-1677	USDA-ARS-USMARC-1677	Anatum	enterica	NA	SAN222	NA	NA	NA	NA	NA	NA	NA	NA	NA	NA	NA	NA	NA	NA	NA	NA	NA	NA	NA	NA	NA	NA
690	CP019897.1	circular	3126	Bacteria	Proteobacteria	Gammaproteobacteria	Enterobacterales	Enterobacteriaceae	Salmonella	Salmonella enterica	Salmonella enterica subsp. enterica serovar Anatum str. USDA-ARS-USMARC-1677 isolate SAN222 plasmid pSAN2-1677, complete sequence	USMARC	2005-07-01	USA: BIFSCo Region 6	taxon:1454588	NA	Bovine	ground beef	NA	genomic DNA	Salmonella enterica subsp. enterica serovar Anatum str. USDA-ARS-USMARC-1677	pSAN2-1677	USDA-ARS-USMARC-1677	Anatum	enterica	NA	SAN222	NA	NA	NA	NA	NA	NA	NA	NA	NA	NA	NA	NA	NA	NA	NA	NA	NA	NA	NA	NA	NA	NA
691	CP019898.1	circular	10280	Bacteria	Proteobacteria	Gammaproteobacteria	Enterobacterales	Enterobacteriaceae	Salmonella	Salmonella enterica	Salmonella enterica subsp. enterica serovar Anatum str. USDA-ARS-USMARC-1175 plasmid pSAN1-1175, complete sequence	NA	2006-09-01	USA: United States BIFSCo Region 3	taxon:1454590	NA	NA	ground beef	NA	genomic DNA	Salmonella enterica subsp. enterica serovar Anatum str. USDA-ARS-USMARC-1175	pSAN1-1175	USDA-ARS-USMARC-1175	Anatum	enterica	NA	NA	NA	NA	NA	NA	NA	NA	NA	NA	NA	NA	NA	NA	NA	NA	NA	NA	NA	NA	NA	NA	NA	NA
692	CP019900.1	circular	108910	Bacteria	Proteobacteria	Gammaproteobacteria	Enterobacterales	Enterobacteriaceae	Raoultella	Raoultella planticola	Raoultella planticola strain GODA plasmid unnamed1, complete sequence	National Chung Cheng University	2016-04-16	Taiwan	taxon:575	NA	Homo sapiens	blood	24.11 N 120.35 E	genomic DNA	Raoultella planticola	unnamed1	GODA	NA	NA	NA	NA	NA	NA	NA	NA	NA	NA	NA	NA	NA	NA	NA	NA	NA	NA	NA	NA	NA	NA	NA	NA	NA	NA
693	CP019902.1	circular	4682	Bacteria	Proteobacteria	Gammaproteobacteria	Enterobacterales	Enterobacteriaceae	Raoultella	Raoultella planticola	Raoultella planticola strain GODA plasmid unnamed3, complete sequence	National Chung Cheng University	2016-04-16	Taiwan	taxon:575	NA	Homo sapiens	blood	24.11 N 120.35 E	genomic DNA	Raoultella planticola	unnamed3	GODA	NA	NA	NA	NA	NA	NA	NA	NA	NA	NA	NA	NA	NA	NA	NA	NA	NA	NA	NA	NA	NA	NA	NA	NA	NA	NA
694	CP019954.1	circular	160021	Bacteria	Proteobacteria	Gammaproteobacteria	Enterobacterales	Enterobacteriaceae	Escherichia	Escherichia coli	Escherichia coli plasmid unnamed1, complete sequence	NA	2012-07-12	Switzerland	taxon:562	NA	Mus musculus C57Bl/6J	ob/ob mice	46.5515 N 6.68867 E	genomic DNA	Escherichia coli	unnamed1	M8	NA	NA	NA	NA	NA	NA	NA	NA	NA	NA	NA	NA	NA	NA	NA	NA	NA	NA	NA	NA	NA	NA	NA	NA	NA	NA
695	CP019955.1	circular	6075	Bacteria	Proteobacteria	Gammaproteobacteria	Enterobacterales	Enterobacteriaceae	Escherichia	Escherichia coli	Escherichia coli plasmid unnamed2, complete sequence	NA	2012-07-12	Switzerland	taxon:562	NA	Mus musculus C57Bl/6J	ob/ob mice	46.5515 N 6.68867 E	genomic DNA	Escherichia coli	unnamed2	M8	NA	NA	NA	NA	NA	NA	NA	NA	NA	NA	NA	NA	NA	NA	NA	NA	NA	NA	NA	NA	NA	NA	NA	NA	NA	NA
696	CP019956.1	circular	4707	Bacteria	Proteobacteria	Gammaproteobacteria	Enterobacterales	Enterobacteriaceae	Escherichia	Escherichia coli	Escherichia coli plasmid unnamed3, complete sequence	NA	2012-07-12	Switzerland	taxon:562	NA	Mus musculus C57Bl/6J	ob/ob mice	46.5515 N 6.68867 E	genomic DNA	Escherichia coli	unnamed3	M8	NA	NA	NA	NA	NA	NA	NA	NA	NA	NA	NA	NA	NA	NA	NA	NA	NA	NA	NA	NA	NA	NA	NA	NA	NA	NA
697	CP019996.1	circular	85439	Bacteria	Proteobacteria	Gammaproteobacteria	Enterobacterales	Enterobacteriaceae	Salmonella	Salmonella enterica	Salmonella enterica subsp. enterica serovar Anatum str. USDA-ARS-USMARC-1781 plasmid pSAN1-08-1092, complete sequence	CDC	May-2007	USA: BIFSCo Region 8	taxon:1454596	NA	Homo sapiens	stool	NA	genomic DNA	Salmonella enterica subsp. enterica serovar Anatum str. USDA-ARS-USMARC-1781	pSAN1-08-1092	USDA-ARS-USMARC-1781	Anatum	enterica	NA	NA	NA	NA	NA	NA	NA	NA	NA	NA	NA	NA	NA	NA	NA	NA	NA	NA	NA	NA	NA	NA	NA	NA
698	CP019997.1	circular	4018	Bacteria	Proteobacteria	Gammaproteobacteria	Enterobacterales	Enterobacteriaceae	Salmonella	Salmonella enterica	Salmonella enterica subsp. enterica serovar Anatum str. USDA-ARS-USMARC-1765 plasmid pSAN2-06-0624, complete sequence	CDC	2006-07-01	USA: BIFSCo Region 5	taxon:1454593	NA	Homo sapiens	stool	NA	genomic DNA	Salmonella enterica subsp. enterica serovar Anatum str. USDA-ARS-USMARC-1765	pSAN2-06-0624	USDA-ARS-USMARC-1765	Anatum	enterica	NA	NA	NA	NA	NA	NA	NA	NA	NA	NA	NA	NA	NA	NA	NA	NA	NA	NA	NA	NA	NA	NA	NA	NA
699	CP020003.1	circular	55336	Bacteria	Firmicutes	Bacilli	Bacillales	Bacillaceae	Bacillus	Bacillus thuringiensis	Bacillus thuringiensis strain L-7601 plasmid unnamed1, complete sequence	NA	2015-10-02	China:tianjin	taxon:1428	NA	NA	NA	NA	genomic DNA	Bacillus thuringiensis	unnamed1	L-7601	NA	NA	NA	NA	NA	NA	NA	NA	NA	NA	NA	NA	NA	NA	NA	NA	NA	NA	NA	NA	NA	NA	NA	NA	NA	NA
700	CP020004.1	circular	49952	Bacteria	Firmicutes	Bacilli	Bacillales	Bacillaceae	Bacillus	Bacillus thuringiensis	Bacillus thuringiensis strain L-7601 plasmid unnamed2, complete sequence	NA	2015-10-02	China:tianjin	taxon:1428	NA	NA	NA	NA	genomic DNA	Bacillus thuringiensis	unnamed2	L-7601	NA	NA	NA	NA	NA	NA	NA	NA	NA	NA	NA	NA	NA	NA	NA	NA	NA	NA	NA	NA	NA	NA	NA	NA	NA	NA
701	CP020005.1	circular	408071	Bacteria	Firmicutes	Bacilli	Bacillales	Bacillaceae	Bacillus	Bacillus thuringiensis	Bacillus thuringiensis strain L-7601 plasmid unnamed3, complete sequence	NA	2015-10-02	China:tianjin	taxon:1428	NA	NA	NA	NA	genomic DNA	Bacillus thuringiensis	unnamed3	L-7601	NA	NA	NA	NA	NA	NA	NA	NA	NA	NA	NA	NA	NA	NA	NA	NA	NA	NA	NA	NA	NA	NA	NA	NA	NA	NA
702	CP020084.1	circular	145829	Bacteria	Proteobacteria	Alphaproteobacteria	Sphingomonadales	Sphingomonadaceae	Blastomonas	Blastomonas fulva	Blastomonas fulva strain T2 plasmid unnamed, complete sequence	NA	2016-01	South Korea: Daejeon	taxon:1550728	NA	NA	microcystis culture	NA	genomic DNA	Blastomonas fulva	unnamed	T2	NA	NA	NA	NA	NA	NA	KCTC:42354	NA	NA	NA	NA	NA	NA	NA	NA	NA	NA	NA	NA	NA	NA	NA	NA	NA	NA	NA
703	CP020087.1	circular	228834	Bacteria	Proteobacteria	Gammaproteobacteria	Enterobacterales	Enterobacteriaceae	Shigella	Shigella flexneri	Shigella flexneri 1a strain 0670 plasmid unnamed1, complete sequence	NA	2006	China: Hangzhou	taxon:374923	NA	Homo sapiens	hospitalized patients	NA	genomic DNA	Shigella flexneri 1a	unnamed1	670	NA	NA	NA	NA	NA	NA	NA	NA	NA	NA	NA	NA	NA	NA	NA	NA	NA	NA	NA	NA	NA	NA	NA	NA	NA	NA
704	CP020088.1	circular	47674	Bacteria	Proteobacteria	Gammaproteobacteria	Enterobacterales	Enterobacteriaceae	Shigella	Shigella flexneri	Shigella flexneri 1a strain 0670 plasmid unnamed2, complete sequence	NA	2006	China: Hangzhou	taxon:374923	NA	Homo sapiens	hospitalized patients	NA	genomic DNA	Shigella flexneri 1a	unnamed2	670	NA	NA	NA	NA	NA	NA	NA	NA	NA	NA	NA	NA	NA	NA	NA	NA	NA	NA	NA	NA	NA	NA	NA	NA	NA	NA
705	CP020113.1	circular	140518	Bacteria	Proteobacteria	Gammaproteobacteria	Enterobacterales	Enterobacteriaceae	Salmonella	Salmonella enterica	Salmonella enterica subsp. enterica serovar Typhimurium str. USDA-ARS-USMARC-1810 plasmid pSTY1-1810, complete sequence	USMARC	2005-10-01	USA: BIFSCo Region 5	taxon:1454647	NA	Bos taurus	bovine pre-evisceration carcass	NA	genomic DNA	Salmonella enterica subsp. enterica serovar Typhimurium str. USDA-ARS-USMARC-1810	pSTY1-1810	USDA-ARS-USMARC-1810	Typhimurium	enterica	NA	NA	NA	NA	NA	NA	NA	NA	NA	NA	NA	NA	NA	NA	NA	NA	NA	NA	NA	NA	NA	NA	NA	NA
706	CP020337.1	circular	223354	Bacteria	Proteobacteria	Gammaproteobacteria	Enterobacterales	Enterobacteriaceae	Shigella	Shigella flexneri	Shigella flexneri 4c strain 1602 plasmid unnamed1, complete sequence	NA	2016	China:Hangzhou	taxon:1617964	NA	NA	hospitalized patients	NA	genomic DNA	Shigella flexneri 4c	unnamed1	1602	NA	NA	NA	NA	NA	NA	NA	NA	NA	NA	NA	NA	NA	NA	NA	NA	NA	NA	NA	NA	NA	NA	NA	NA	NA	NA
707	CP020338.1	circular	95633	Bacteria	Proteobacteria	Gammaproteobacteria	Enterobacterales	Enterobacteriaceae	Shigella	Shigella flexneri	Shigella flexneri 4c strain 1602 plasmid unnamed2, complete sequence	NA	2016	China:Hangzhou	taxon:1617964	NA	NA	hospitalized patients	NA	genomic DNA	Shigella flexneri 4c	unnamed2	1602	NA	NA	NA	NA	NA	NA	NA	NA	NA	NA	NA	NA	NA	NA	NA	NA	NA	NA	NA	NA	NA	NA	NA	NA	NA	NA
708	CP020340.1	circular	73096	Bacteria	Proteobacteria	Gammaproteobacteria	Enterobacterales	Enterobacteriaceae	Shigella	Shigella flexneri	Shigella flexneri 4c strain 0702 plasmid unnamed1, complete sequence	NA	2007	China: Hangzhou	taxon:1617964	NA	NA	hospitalized patients	NA	genomic DNA	Shigella flexneri 4c	unnamed1	702	NA	NA	NA	NA	NA	NA	NA	NA	NA	NA	NA	NA	NA	NA	NA	NA	NA	NA	NA	NA	NA	NA	NA	NA	NA	NA
709	CP020341.1	circular	47688	Bacteria	Proteobacteria	Gammaproteobacteria	Enterobacterales	Enterobacteriaceae	Shigella	Shigella flexneri	Shigella flexneri 4c strain 0702 plasmid unnamed2, complete sequence	NA	2007	China: Hangzhou	taxon:1617964	NA	NA	hospitalized patients	NA	genomic DNA	Shigella flexneri 4c	unnamed2	702	NA	NA	NA	NA	NA	NA	NA	NA	NA	NA	NA	NA	NA	NA	NA	NA	NA	NA	NA	NA	NA	NA	NA	NA	NA	NA
710	CP020343.1	circular	144194	Bacteria	Proteobacteria	Gammaproteobacteria	Enterobacterales	Enterobacteriaceae	Shigella	Shigella flexneri	Shigella flexneri 1a strain 0439 plasmid unnamed1, complete sequence	NA	2004	China: Hangzhou	taxon:374923	NA	Homo sapiens	NA	NA	genomic DNA	Shigella flexneri 1a	unnamed1	439	NA	NA	NA	NA	NA	NA	NA	NA	NA	NA	NA	NA	NA	NA	NA	NA	NA	NA	NA	NA	NA	NA	NA	NA	NA	NA
711	CP020344.1	circular	78308	Bacteria	Proteobacteria	Gammaproteobacteria	Enterobacterales	Enterobacteriaceae	Shigella	Shigella flexneri	Shigella flexneri 1a strain 0439 plasmid unnamed2, complete sequence	NA	2004	China: Hangzhou	taxon:374923	NA	Homo sapiens	NA	NA	genomic DNA	Shigella flexneri 1a	unnamed2	439	NA	NA	NA	NA	NA	NA	NA	NA	NA	NA	NA	NA	NA	NA	NA	NA	NA	NA	NA	NA	NA	NA	NA	NA	NA	NA
712	CP020348.1	circular	34596	Bacteria	Proteobacteria	Gammaproteobacteria	Pasteurellales	Pasteurellaceae	Pasteurella	Pasteurella multocida	Pasteurella multocida subsp. septica strain CIRMBP-0873 plasmid unnamed1, complete sequence	Labovet	NA	France: Pays de la Loire	taxon:115545	NA	Oryctolagus cuniculus	lung	NA	genomic DNA	Pasteurella multocida subsp. septica	unnamed1	CIRMBP-0873	NA	septica	NA	NA	NA	NA	NA	NA	NA	NA	NA	NA	NA	NA	NA	NA	NA	NA	NA	NA	NA	NA	NA	NA	NA	NA
713	CP020349.1	circular	28093	Bacteria	Proteobacteria	Gammaproteobacteria	Pasteurellales	Pasteurellaceae	Pasteurella	Pasteurella multocida	Pasteurella multocida subsp. septica strain CIRMBP-0873 plasmid unnamed2, complete sequence	Labovet	NA	France: Pays de la Loire	taxon:115545	NA	Oryctolagus cuniculus	lung	NA	genomic DNA	Pasteurella multocida subsp. septica	unnamed2	CIRMBP-0873	NA	septica	NA	NA	NA	NA	NA	NA	NA	NA	NA	NA	NA	NA	NA	NA	NA	NA	NA	NA	NA	NA	NA	NA	NA	NA
714	CP020376.1	circular	31224	Bacteria	Proteobacteria	Gammaproteobacteria	Enterobacterales	Enterobacteriaceae	Escherichia	Escherichia coli	Escherichia coli strain ICBEC79H plasmid pICBEC79Hmcr, complete sequence	Marco Vianello	10-Aug-2016	Brazil: Natal	taxon:562	NA	Homo sapiens	urine infection	5.77926 S 35.2009 W	genomic DNA	Escherichia coli	pICBEC79Hmcr	ICBEC79H	NA	NA	NA	NA	NA	NA	NA	NA	NA	NA	NA	NA	NA	NA	NA	NA	NA	NA	NA	NA	NA	NA	NA	NA	NA	NA
715	CP020571.1	circular	11273	Bacteria	Deinococcus-Thermus	Deinococci	Thermales	Thermaceae	Thermus	Thermus aquaticus	Thermus aquaticus strain YT-1 plasmid p11, complete sequence	NA	2015-01-01	Poland: Gdansk	taxon:271	NA	NA	NA	NA	genomic DNA	Thermus aquaticus	p11	YT-1	NA	NA	NA	NA	NA	NA	NA	NA	type strain of Thermus aquaticus	NA	NA	NA	NA	NA	NA	NA	NA	NA	NA	NA	NA	NA	NA	NA	NA	NA
716	CP020572.1	circular	60786	Bacteria	Deinococcus-Thermus	Deinococci	Thermales	Thermaceae	Thermus	Thermus aquaticus	Thermus aquaticus strain YT-1 plasmid p61, complete sequence	NA	2015-01-01	Poland: Gdansk	taxon:271	NA	NA	NA	NA	genomic DNA	Thermus aquaticus	p61	YT-1	NA	NA	NA	NA	NA	NA	NA	NA	type strain of Thermus aquaticus	NA	NA	NA	NA	NA	NA	NA	NA	NA	NA	NA	NA	NA	NA	NA	NA	NA
717	CP020721.1	linear	91195	Bacteria	Bacteroidetes	NA	Bacteroidetes Order II. Incertae sedis	Rhodothermaceae	Salinibacter	Salinibacter ruber	Salinibacter ruber strain ST67 plasmid unnamed1, complete sequence	NA	2010	Spain: Tarragona	taxon:146919	NA	NA	brine	NA	genomic DNA	Salinibacter ruber	unnamed1	ST67	NA	NA	NA	NA	NA	NA	CECT:9123	NA	NA	NA	NA	NA	NA	NA	NA	NA	NA	NA	NA	NA	NA	NA	NA	NA	NA	NA
718	CP020736.1	circular	6453	Bacteria	Firmicutes	Bacilli	Bacillales	Staphylococcaceae	Staphylococcus	Staphylococcus lugdunensis	Staphylococcus lugdunensis strain VISLISI_27 plasmid pVISLISI_2 complete sequence	EA-7290	2014-10-01	France: Strasbourg	taxon:28035	NA	Homo sapiens	NA	48.34 N 7.45 E	genomic DNA	Staphylococcus lugdunensis	pVISLISI_2	VISLISI_27	NA	NA	NA	NA	NA	NA	NA	NA	NA	NA	NA	NA	NA	NA	NA	NA	NA	NA	NA	NA	NA	NA	NA	NA	NA	NA
719	CP020755.1	circular	600505	Bacteria	Firmicutes	Bacilli	Bacillales	Bacillaceae	Bacillus	Bacillus thuringiensis	Bacillus thuringiensis strain ATCC 10792 plasmid pLDW-16, complete sequence	NA	1946	USA	taxon:1428	NA	NA	Tissue, animal	NA	genomic DNA	Bacillus thuringiensis	pLDW-16	ATCC 10792	NA	NA	NA	NA	NA	NA	NA	NA	type strain of Bacillus thuringiensis	NA	NA	NA	NA	NA	NA	NA	NA	NA	NA	NA	NA	NA	NA	NA	NA	NA
720	CP020756.1	circular	137311	Bacteria	Firmicutes	Bacilli	Bacillales	Bacillaceae	Bacillus	Bacillus thuringiensis	Bacillus thuringiensis strain ATCC 10792 plasmid pLDW-17, complete sequence	NA	1946	USA	taxon:1428	NA	NA	Tissue, animal	NA	genomic DNA	Bacillus thuringiensis	pLDW-17	ATCC 10792	NA	NA	NA	NA	NA	NA	NA	NA	type strain of Bacillus thuringiensis	NA	NA	NA	NA	NA	NA	NA	NA	NA	NA	NA	NA	NA	NA	NA	NA	NA
721	CP020757.1	circular	85218	Bacteria	Firmicutes	Bacilli	Bacillales	Bacillaceae	Bacillus	Bacillus thuringiensis	Bacillus thuringiensis strain ATCC 10792 plasmid pLDW-18, complete sequence	NA	1946	USA	taxon:1428	NA	NA	Tissue, animal	NA	genomic DNA	Bacillus thuringiensis	pLDW-18	ATCC 10792	NA	NA	NA	NA	NA	NA	NA	NA	type strain of Bacillus thuringiensis	NA	NA	NA	NA	NA	NA	NA	NA	NA	NA	NA	NA	NA	NA	NA	NA	NA
722	CP020758.1	circular	73623	Bacteria	Firmicutes	Bacilli	Bacillales	Bacillaceae	Bacillus	Bacillus thuringiensis	Bacillus thuringiensis strain ATCC 10792 plasmid pLDW-19, complete sequence	NA	1946	USA	taxon:1428	NA	NA	Tissue, animal	NA	genomic DNA	Bacillus thuringiensis	pLDW-19	ATCC 10792	NA	NA	NA	NA	NA	NA	NA	NA	type strain of Bacillus thuringiensis	NA	NA	NA	NA	NA	NA	NA	NA	NA	NA	NA	NA	NA	NA	NA	NA	NA
723	CP020759.1	circular	10076	Bacteria	Firmicutes	Bacilli	Bacillales	Bacillaceae	Bacillus	Bacillus thuringiensis	Bacillus thuringiensis strain ATCC 10792 plasmid pLDW-20, complete sequence	NA	1946	USA	taxon:1428	NA	NA	Tissue, animal	NA	genomic DNA	Bacillus thuringiensis	pLDW-20	ATCC 10792	NA	NA	NA	NA	NA	NA	NA	NA	type strain of Bacillus thuringiensis	NA	NA	NA	NA	NA	NA	NA	NA	NA	NA	NA	NA	NA	NA	NA	NA	NA
724	CP020760.1	circular	10021	Bacteria	Firmicutes	Bacilli	Bacillales	Bacillaceae	Bacillus	Bacillus thuringiensis	Bacillus thuringiensis strain ATCC 10792 plasmid pLDW-21, complete sequence	NA	1946	USA	taxon:1428	NA	NA	Tissue, animal	NA	genomic DNA	Bacillus thuringiensis	pLDW-21	ATCC 10792	NA	NA	NA	NA	NA	NA	NA	NA	type strain of Bacillus thuringiensis	NA	NA	NA	NA	NA	NA	NA	NA	NA	NA	NA	NA	NA	NA	NA	NA	NA
725	CP020765.1	circular	3110	Bacteria	Firmicutes	Bacilli	Bacillales	Staphylococcaceae	Staphylococcus	Staphylococcus lugdunensis	Staphylococcus lugdunensis strain VISLISI_22 plasmid pVISLISI_1, complete sequence	xavier argemi	2015-08	France: strasbourg	taxon:28035	NA	Homo sapiens	blood culture	48.35 N 7.44 E	genomic DNA	Staphylococcus lugdunensis	pVISLISI_1	VISLISI_22	NA	NA	NA	NA	NA	NA	NA	NA	NA	NA	NA	NA	NA	NA	NA	NA	NA	NA	NA	NA	NA	NA	NA	NA	NA	NA
726	CP020766.1	circular	12579	Bacteria	Firmicutes	Bacilli	Bacillales	Staphylococcaceae	Staphylococcus	Staphylococcus lugdunensis	Staphylococcus lugdunensis strain C_33 plasmid pVISLISI_5, complete sequence	Xavier Argemi	2015-01	France: strasbourg	taxon:28035	NA	Homo sapiens	Cutaneous swab	48.35 N 7.44 E	genomic DNA	Staphylococcus lugdunensis	pVISLISI_5	C_33	NA	NA	NA	NA	NA	NA	NA	NA	NA	NA	NA	NA	NA	NA	NA	NA	NA	NA	NA	NA	NA	NA	NA	NA	NA	NA
727	CP020770.1	circular	4319	Bacteria	Firmicutes	Bacilli	Bacillales	Staphylococcaceae	Staphylococcus	Staphylococcus lugdunensis	Staphylococcus lugdunensis strain VISLISI_33 plasmid pVISLISI_3, complete sequence	xavier argemi	2015-09	France: Strasbourg	taxon:28035	NA	Homo sapiens	liver abscess	NA	genomic DNA	Staphylococcus lugdunensis	pVISLISI_3	VISLISI_33	NA	NA	NA	NA	NA	xavier argemi	NA	NA	NA	NA	NA	NA	NA	NA	NA	NA	NA	NA	NA	NA	NA	NA	NA	NA	NA	NA
728	CP020871.1	circular	35273	Bacteria	Proteobacteria	Gammaproteobacteria	Xanthomonadales	Xanthomonadaceae	Xylella	Xylella fastidiosa	Xylella fastidiosa subsp. pauca strain De Donno plasmid pXF-De_Donno, complete sequence	NA	2014-06-01	Italy: Apulia (region)	taxon:698414	NA	Olea europaea	NA	NA	genomic DNA	Xylella fastidiosa subsp. pauca	pXF-De_Donno	De Donno	NA	pauca	NA	NA	NA	NA	NA	NA	NA	NA	NA	NA	NA	NA	NA	NA	NA	NA	NA	NA	NA	NA	NA	NA	NA	NA
729	CP020963.1	circular	5222	Bacteria	Proteobacteria	Alphaproteobacteria	Rhodospirillales	Rhodospirillaceae	Magnetospirillum	Magnetospirillum sp. ME-1	Magnetospirillum sp. ME-1 plasmid unnamed1, complete sequence	NA	2007-03-01	China: East Lake sediment, Wuhan city	taxon:1639348	NA	NA	water	30.55 N 114.36 E	genomic DNA	Magnetospirillum sp. ME-1	unnamed1	ME-1	NA	NA	NA	NA	NA	NA	NA	NA	NA	NA	NA	NA	NA	NA	NA	NA	NA	NA	NA	NA	NA	NA	NA	NA	NA	NA
730	CP020972.1	circular	77320	Bacteria	Proteobacteria	Gammaproteobacteria	Xanthomonadales	Xanthomonadaceae	Xanthomonas	Xanthomonas phaseoli	Xanthomonas axonopodis pv. phaseoli strain CFBP6546R plasmid pA, complete sequence	NA	NA	USA	taxon:317013	NA	Phaseolus vulgaris	NA	NA	genomic DNA	Xanthomonas phaseoli pv. phaseoli	pA	CFBP6546R	NA	NA	NA	NA	pathovar: phaseoli	NA	CFBP:6546	NA	NA	NA	NA	NA	NA	NA	NA	NA	NA	NA	NA	NA	NA	NA	NA	NA	NA	NA
731	CP020973.1	circular	70397	Bacteria	Proteobacteria	Gammaproteobacteria	Xanthomonadales	Xanthomonadaceae	Xanthomonas	Xanthomonas phaseoli	Xanthomonas axonopodis pv. phaseoli strain CFBP6546R plasmid pC, complete sequence	NA	NA	USA	taxon:317013	NA	Phaseolus vulgaris	NA	NA	genomic DNA	Xanthomonas phaseoli pv. phaseoli	pC	CFBP6546R	NA	NA	NA	NA	pathovar: phaseoli	NA	CFBP:6546	NA	NA	NA	NA	NA	NA	NA	NA	NA	NA	NA	NA	NA	NA	NA	NA	NA	NA	NA
732	CP020974.1	circular	28940	Bacteria	Proteobacteria	Gammaproteobacteria	Xanthomonadales	Xanthomonadaceae	Xanthomonas	Xanthomonas phaseoli	Xanthomonas axonopodis pv. phaseoli strain CFBP6546R plasmid unnamed1, complete sequence	NA	NA	USA	taxon:317013	NA	Phaseolus vulgaris	NA	NA	genomic DNA	Xanthomonas phaseoli pv. phaseoli	unnamed1	CFBP6546R	NA	NA	NA	NA	pathovar: phaseoli	NA	CFBP:6546	NA	NA	NA	NA	NA	NA	NA	NA	NA	NA	NA	NA	NA	NA	NA	NA	NA	NA	NA
733	CP021013.1	circular	52701	Bacteria	Proteobacteria	Gammaproteobacteria	Xanthomonadales	Xanthomonadaceae	Xanthomonas	Xanthomonas citri	Xanthomonas citri pv. phaseoli var. fuscans strain CFBP7767 plasmid pA, complete sequence	NA	2009	Cameroon	taxon:473423	NA	Phaseolus sp.	NA	NA	genomic DNA	Xanthomonas citri pv. phaseoli var. fuscans	pA	CFBP7767	NA	NA	NA	NA	NA	NA	CFBP:7767	NA	NA	NA	NA	NA	NA	NA	NA	NA	NA	NA	NA	NA	NA	NA	NA	NA	NA	NA
734	CP021014.1	circular	52117	Bacteria	Proteobacteria	Gammaproteobacteria	Xanthomonadales	Xanthomonadaceae	Xanthomonas	Xanthomonas citri	Xanthomonas citri pv. phaseoli var. fuscans strain CFBP7767 plasmid pC, complete sequence	NA	2009	Cameroon	taxon:473423	NA	Phaseolus sp.	NA	NA	genomic DNA	Xanthomonas citri pv. phaseoli var. fuscans	pC	CFBP7767	NA	NA	NA	NA	NA	NA	CFBP:7767	NA	NA	NA	NA	NA	NA	NA	NA	NA	NA	NA	NA	NA	NA	NA	NA	NA	NA	NA
735	CP021082.1	circular	642681	Bacteria	Deinococcus-Thermus	Deinococci	Deinococcales	Deinococcaceae	Deinococcus	Deinococcus ficus	Deinococcus ficus strain CC-FR2-10 plasmid pDFI1, complete sequence	Wei-An Lai	2005-03-09	Taiwan: Taichung	taxon:317577	NA	Ficus religiosa L.	rhizosphere	24.1213 N 120.676 E	genomic DNA	Deinococcus ficus	pDFI1	CC-FR2-10	NA	NA	NA	NA	NA	Wei-Shuo Huang	NA	NA	type strain of Deinococcus ficus	NA	NA	NA	NA	NA	NA	NA	NA	NA	NA	NA	NA	NA	NA	NA	NA	NA
736	CP021083.1	circular	395118	Bacteria	Deinococcus-Thermus	Deinococci	Deinococcales	Deinococcaceae	Deinococcus	Deinococcus ficus	Deinococcus ficus strain CC-FR2-10 plasmid pDFI2, complete sequence	Wei-An Lai	2005-03-09	Taiwan: Taichung	taxon:317577	NA	Ficus religiosa L.	rhizosphere	24.1213 N 120.676 E	genomic DNA	Deinococcus ficus	pDFI2	CC-FR2-10	NA	NA	NA	NA	NA	Wei-Shuo Huang	NA	NA	type strain of Deinococcus ficus	NA	NA	NA	NA	NA	NA	NA	NA	NA	NA	NA	NA	NA	NA	NA	NA	NA
737	CP021084.1	circular	311736	Bacteria	Deinococcus-Thermus	Deinococci	Deinococcales	Deinococcaceae	Deinococcus	Deinococcus ficus	Deinococcus ficus strain CC-FR2-10 plasmid pDFI3, complete sequence	Wei-An Lai	2005-03-09	Taiwan: Taichung	taxon:317577	NA	Ficus religiosa L.	rhizosphere	24.1213 N 120.676 E	genomic DNA	Deinococcus ficus	pDFI3	CC-FR2-10	NA	NA	NA	NA	NA	Wei-Shuo Huang	NA	NA	type strain of Deinococcus ficus	NA	NA	NA	NA	NA	NA	NA	NA	NA	NA	NA	NA	NA	NA	NA	NA	NA
738	CP021085.1	circular	5785	Bacteria	Deinococcus-Thermus	Deinococci	Deinococcales	Deinococcaceae	Deinococcus	Deinococcus ficus	Deinococcus ficus strain CC-FR2-10 plasmid pDFI4, complete sequence	Wei-An Lai	2005-03-09	Taiwan: Taichung	taxon:317577	NA	Ficus religiosa L.	rhizosphere	24.1213 N 120.676 E	genomic DNA	Deinococcus ficus	pDFI4	CC-FR2-10	NA	NA	NA	NA	NA	Wei-Shuo Huang	NA	NA	type strain of Deinococcus ficus	NA	NA	NA	NA	NA	NA	NA	NA	NA	NA	NA	NA	NA	NA	NA	NA	NA
739	CP021131.1	circular	271068	Bacteria	Deinococcus-Thermus	Deinococci	Thermales	Thermaceae	Meiothermus	Meiothermus taiwanensis	Meiothermus taiwanensis strain WR-220 plasmid pMtWR-220, complete sequence	NA	NA	Taiwan	taxon:172827	NA	NA	NA	NA	genomic DNA	Meiothermus taiwanensis	pMtWR-220	WR-220	NA	NA	NA	NA	NA	NA	NA	NA	NA	NA	NA	NA	NA	NA	NA	NA	NA	NA	NA	NA	NA	NA	NA	NA	NA	NA
740	CP021194.1	circular	59711	Bacteria	Proteobacteria	Gammaproteobacteria	Enterobacterales	Enterobacteriaceae	Escherichia	Escherichia coli	Escherichia coli strain H17 plasmid pH17-1, complete sequence	SRRSH hospital	2012-10	China: Hefei	taxon:562	NA	Homo sapiens	hospital	31.85 N 117.26 E	genomic DNA	Escherichia coli	pH17-1	H17	NA	NA	NA	NA	NA	NA	NA	NA	NA	NA	NA	NA	NA	NA	NA	NA	NA	NA	NA	NA	NA	NA	NA	NA	NA	NA
741	CP021195.1	circular	107793	Bacteria	Proteobacteria	Gammaproteobacteria	Enterobacterales	Enterobacteriaceae	Escherichia	Escherichia coli	Escherichia coli strain H17 plasmid pH17-2, complete sequence	SRRSH hospital	2012-10	China: Hefei	taxon:562	NA	Homo sapiens	hospital	31.85 N 117.26 E	genomic DNA	Escherichia coli	pH17-2	H17	NA	NA	NA	NA	NA	NA	NA	NA	NA	NA	NA	NA	NA	NA	NA	NA	NA	NA	NA	NA	NA	NA	NA	NA	NA	NA
742	CP021196.1	circular	252257	Bacteria	Proteobacteria	Gammaproteobacteria	Enterobacterales	Enterobacteriaceae	Escherichia	Escherichia coli	Escherichia coli strain H17 plasmid pH17-3, complete sequence	SRRSH hospital	2012-10	China: Hefei	taxon:562	NA	Homo sapiens	hospital	31.85 N 117.26 E	genomic DNA	Escherichia coli	pH17-3	H17	NA	NA	NA	NA	NA	NA	NA	NA	NA	NA	NA	NA	NA	NA	NA	NA	NA	NA	NA	NA	NA	NA	NA	NA	NA	NA
743	CP021197.1	circular	99593	Bacteria	Proteobacteria	Gammaproteobacteria	Enterobacterales	Enterobacteriaceae	Escherichia	Escherichia coli	Escherichia coli strain H17 plasmid pH17-4, complete sequence	SRRSH hospital	2012-10	China: Hefei	taxon:562	NA	Homo sapiens	hospital	31.85 N 117.26 E	genomic DNA	Escherichia coli	pH17-4	H17	NA	NA	NA	NA	NA	NA	NA	NA	NA	NA	NA	NA	NA	NA	NA	NA	NA	NA	NA	NA	NA	NA	NA	NA	NA	NA
744	CP021198.1	circular	157585	Bacteria	Proteobacteria	Gammaproteobacteria	Enterobacterales	Enterobacteriaceae	Escherichia	Escherichia coli	Escherichia coli strain H17 plasmid pH17-5, complete sequence	SRRSH hospital	2012-10	China: Hefei	taxon:562	NA	Homo sapiens	hospital	31.85 N 117.26 E	genomic DNA	Escherichia coli	pH17-5	H17	NA	NA	NA	NA	NA	NA	NA	NA	NA	NA	NA	NA	NA	NA	NA	NA	NA	NA	NA	NA	NA	NA	NA	NA	NA	NA
745	CP021236.1	circular	204027	Bacteria	Bacteroidetes	Cytophagia	Cytophagales	Hymenobacteraceae	Pontibacter	Pontibacter actiniarum	Pontibacter actiniarum DSM 19842 plasmid, complete sequence	NA	2005	Russia: Pacific Ocean, Rudnaya Bay	taxon:323450	NA	NA	unidentified actinians	NA	genomic DNA	Pontibacter actiniarum	unnamed	DSM 19842	NA	NA	NA	NA	NA	NA	DSM:19842, KMM:6156	NA	NA	NA	NA	NA	NA	NA	NA	NA	NA	NA	NA	NA	NA	NA	NA	NA	NA	NA
746	CP021331.1	circular	174698	Bacteria	Proteobacteria	Alphaproteobacteria	Rhizobiales	Hyphomicrobiaceae	Maritalea	Maritalea myrionectae	Maritalea myrionectae strain HL2708#5 plasmid pHL2708X3, complete sequence	NA	2016	South Korea: Cheju Island	taxon:454601	NA	NA	lava	NA	genomic DNA	Maritalea myrionectae	pHL2708X3	HL2708#5	NA	NA	NA	NA	NA	NA	NA	NA	NA	NA	NA	NA	NA	NA	NA	NA	NA	NA	NA	NA	NA	NA	NA	NA	NA	NA
747	CP021332.1	circular	148622	Bacteria	Proteobacteria	Alphaproteobacteria	Rhizobiales	Hyphomicrobiaceae	Maritalea	Maritalea myrionectae	Maritalea myrionectae strain HL2708#5 plasmid pHL2708Y3, complete sequence	NA	2016	South Korea: Cheju Island	taxon:454601	NA	NA	lava	NA	genomic DNA	Maritalea myrionectae	pHL2708Y3	HL2708#5	NA	NA	NA	NA	NA	NA	NA	NA	NA	NA	NA	NA	NA	NA	NA	NA	NA	NA	NA	NA	NA	NA	NA	NA	NA	NA
748	CP021372.1	circular	516813	Bacteria	Proteobacteria	Alphaproteobacteria	Rhizobiales	Rhizobiaceae	Rhizobium	Rhizobium sp. ACO-34A	Rhizobium sp. ACO-34A plasmid pRACO34Ad, complete sequence	Reiner Rincon Rosales	2014-03-16	Mexico: Comitan de Dominguez, Chiapas	taxon:1571470	NA	Agave americana L.	rhizosphere	NA	genomic DNA	Rhizobium sp. ACO-34A	pRACO34Ad	ACO-34A	NA	NA	NA	NA	NA	NA	NA	NA	NA	NA	NA	NA	NA	NA	NA	NA	NA	NA	NA	NA	NA	NA	NA	NA	NA	NA
749	CP021373.1	circular	494144	Bacteria	Proteobacteria	Alphaproteobacteria	Rhizobiales	Rhizobiaceae	Rhizobium	Rhizobium sp. ACO-34A	Rhizobium sp. ACO-34A plasmid pRACO34Ac, complete sequence	Reiner Rincon Rosales	2014-03-16	Mexico: Comitan de Dominguez, Chiapas	taxon:1571470	NA	Agave americana L.	rhizosphere	NA	genomic DNA	Rhizobium sp. ACO-34A	pRACO34Ac	ACO-34A	NA	NA	NA	NA	NA	NA	NA	NA	NA	NA	NA	NA	NA	NA	NA	NA	NA	NA	NA	NA	NA	NA	NA	NA	NA	NA
750	CP021374.1	circular	305590	Bacteria	Proteobacteria	Alphaproteobacteria	Rhizobiales	Rhizobiaceae	Rhizobium	Rhizobium sp. ACO-34A	Rhizobium sp. ACO-34A plasmid pRACO34Ab, complete sequence	Reiner Rincon Rosales	2014-03-16	Mexico: Comitan de Dominguez, Chiapas	taxon:1571470	NA	Agave americana L.	rhizosphere	NA	genomic DNA	Rhizobium sp. ACO-34A	pRACO34Ab	ACO-34A	NA	NA	NA	NA	NA	NA	NA	NA	NA	NA	NA	NA	NA	NA	NA	NA	NA	NA	NA	NA	NA	NA	NA	NA	NA	NA
751	CP021375.1	circular	213273	Bacteria	Proteobacteria	Alphaproteobacteria	Rhizobiales	Rhizobiaceae	Rhizobium	Rhizobium sp. ACO-34A	Rhizobium sp. ACO-34A plasmid pRACO34Aa, complete sequence	Reiner Rincon Rosales	2014-03-16	Mexico: Comitan de Dominguez, Chiapas	taxon:1571470	NA	Agave americana L.	rhizosphere	NA	genomic DNA	Rhizobium sp. ACO-34A	pRACO34Aa	ACO-34A	NA	NA	NA	NA	NA	NA	NA	NA	NA	NA	NA	NA	NA	NA	NA	NA	NA	NA	NA	NA	NA	NA	NA	NA	NA	NA
752	CP021418.1	circular	31224	Bacteria	Proteobacteria	Gammaproteobacteria	Enterobacterales	Enterobacteriaceae	Escherichia	Escherichia coli	Escherichia coli strain ICBEC171S plasmid pICBEC171Smcr, complete sequence	Marina Moreno	2012-07-05	Brazil:Minas Gerais	taxon:562	NA	Sus scrofa	rectal swab	18.5122 S 44.5550 W	genomic DNA	Escherichia coli	pICBEC171Smcr	ICBEC171S	NA	NA	NA	NA	NA	NA	NA	NA	NA	NA	NA	NA	NA	NA	NA	NA	NA	NA	NA	NA	NA	NA	NA	NA	NA	NA
753	CP021419.1	circular	33304	Bacteria	Proteobacteria	Gammaproteobacteria	Enterobacterales	Enterobacteriaceae	Escherichia	Escherichia coli	Escherichia coli strain ICBEC12-3F plasmid pICBEC12-3mcr, complete sequence	Luciana K. Otutumi	10-Aug-2013	Brazil:Parana	taxon:562	NA	Gallus gallus	Cloacal swab	25.2521 S 52.0215 W	genomic DNA	Escherichia coli	pICBEC12-3mcr	ICBEC12-3F	NA	NA	NA	NA	NA	NA	NA	NA	NA	NA	NA	NA	NA	NA	NA	NA	NA	NA	NA	NA	NA	NA	NA	NA	NA	NA
754	CP021492.1	circular	37363	Bacteria	Firmicutes	Bacilli	Lactobacillales	Leuconostocaceae	Leuconostoc	Leuconostoc mesenteroides	Leuconostoc mesenteroides strain WiKim33 plasmid unnamed1, complete sequence	World Institude of Kimchi	2015	South Korea: Gwangju	taxon:1245	NA	NA	Baechu-kimchi	35.11 N 126.87 E	genomic DNA	Leuconostoc mesenteroides	unnamed1	WiKim33	NA	NA	NA	NA	NA	Moeun Lee	NA	NA	NA	NA	NA	NA	NA	NA	NA	NA	NA	NA	NA	NA	NA	NA	NA	NA	NA	NA
755	CP021493.1	circular	18960	Bacteria	Firmicutes	Bacilli	Lactobacillales	Leuconostocaceae	Leuconostoc	Leuconostoc mesenteroides	Leuconostoc mesenteroides strain WiKim33 plasmid unnamed2, complete sequence	World Institude of Kimchi	2015	South Korea: Gwangju	taxon:1245	NA	NA	Baechu-kimchi	35.11 N 126.87 E	genomic DNA	Leuconostoc mesenteroides	unnamed2	WiKim33	NA	NA	NA	NA	NA	Moeun Lee	NA	NA	NA	NA	NA	NA	NA	NA	NA	NA	NA	NA	NA	NA	NA	NA	NA	NA	NA	NA
756	CP021494.1	circular	18944	Bacteria	Firmicutes	Bacilli	Lactobacillales	Leuconostocaceae	Leuconostoc	Leuconostoc mesenteroides	Leuconostoc mesenteroides strain WiKim33 plasmid unnamed3, complete sequence	World Institude of Kimchi	2015	South Korea: Gwangju	taxon:1245	NA	NA	Baechu-kimchi	35.11 N 126.87 E	genomic DNA	Leuconostoc mesenteroides	unnamed3	WiKim33	NA	NA	NA	NA	NA	Moeun Lee	NA	NA	NA	NA	NA	NA	NA	NA	NA	NA	NA	NA	NA	NA	NA	NA	NA	NA	NA	NA
757	CP021660.1	circular	148316	Bacteria	Proteobacteria	Gammaproteobacteria	Enterobacterales	Yersiniaceae	Candidatus Fukatsuia	Candidatus Fukatsuia symbiotica	Candidatus Fukatsuia symbiotica strain 5D plasmid p5D_Fsymbiotica-1, complete sequence	NA	2016-03-01	USA	taxon:1878942	NA	Acyrthosiphon pisum	cell culture	NA	genomic DNA	Candidatus Fukatsuia symbiotica	p5D_Fsymbiotica-1	5D	NA	NA	NA	NA	NA	NA	NA	NA	NA	NA	NA	NA	NA	NA	NA	NA	NA	NA	NA	NA	NA	NA	NA	NA	NA	NA
758	CP021662.1	circular	67447	Bacteria	Proteobacteria	Gammaproteobacteria	Enterobacterales	Yersiniaceae	Candidatus Fukatsuia	Candidatus Fukatsuia symbiotica	Candidatus Fukatsuia symbiotica strain 5D plasmid p5D_Fsymbiotica-3, complete sequence	NA	2016-03-01	USA	taxon:1878942	NA	Acyrthosiphon pisum	cell culture	NA	genomic DNA	Candidatus Fukatsuia symbiotica	p5D_Fsymbiotica-3	5D	NA	NA	NA	NA	NA	NA	NA	NA	NA	NA	NA	NA	NA	NA	NA	NA	NA	NA	NA	NA	NA	NA	NA	NA	NA	NA
759	CP021763.1	circular	2094505	Bacteria	Proteobacteria	Betaproteobacteria	Burkholderiales	Burkholderiaceae	Ralstonia	Ralstonia pseudosolanacearum	Ralstonia pseudosolanacearum strain RS 476 plasmid unnamed, complete sequence	NA	2011-12-20	Brazil: Dom Pedro, Maranhao	taxon:1310165	NA	Solanum lycopersicum	Tomato with bacterial wilt symptoms	4.4833 S 44.45 W	genomic DNA	Ralstonia pseudosolanacearum	unnamed	RS 476	NA	NA	NA	NA	NA	NA	NA	NA	NA	NA	NA	NA	NA	NA	NA	NA	NA	NA	NA	NA	NA	NA	NA	NA	NA	NA
760	CP021765.1	circular	2094523	Bacteria	Proteobacteria	Betaproteobacteria	Burkholderiales	Burkholderiaceae	Ralstonia	Ralstonia pseudosolanacearum	Ralstonia pseudosolanacearum strain CRMRs218 plasmid unnamed, complete sequence	NA	2014-05-18	Brazil: Camocim de Sao Felix, Pernambuco	taxon:1310165	NA	Solanum melongena	Eggplant plant with bacterial wilt symptoms	8.3593 S 35.7639 W	genomic DNA	Ralstonia pseudosolanacearum	unnamed	CRMRs218	NA	NA	NA	NA	NA	NA	NA	NA	NA	NA	NA	NA	NA	NA	NA	NA	NA	NA	NA	NA	NA	NA	NA	NA	NA	NA
761	CP021792.1	circular	1743	Bacteria	Proteobacteria	Alphaproteobacteria	Sphingomonadales	Sphingomonadaceae	Zymomonas	Zymomonas mobilis	Zymomonas mobilis subsp. mobilis strain NRRL B-1960 plasmid pZMO1960_1A, complete sequence	NA	2017	United Kingdom: Scotland	taxon:120045	NA	NA	spoiled apple cider	56.4907 N 4.2026 W	genomic DNA	Zymomonas mobilis subsp. mobilis	pZMO1960_1A	NRRL B-1960	NA	mobilis	NA	NA	NA	NA	NA	NA	NA	NA	NA	NA	NA	NA	NA	NA	NA	NA	NA	NA	NA	NA	NA	NA	NA	NA
762	CP021873.1	linear	73089	Bacteria	Spirochaetes	Spirochaetia	Spirochaetales	Borreliaceae	Borrelia	Borrelia miyamotoi	Borrelia miyamotoi strain CA17-2241 plasmid lp72, complete sequence	NA	2015	USA: California	taxon:47466	NA	Ixodes pacificus	NA	NA	genomic DNA	Borrelia miyamotoi	lp72	CA17-2241	NA	NA	NA	NA	NA	NA	NA	NA	NA	NA	NA	NA	NA	NA	NA	NA	NA	NA	NA	NA	NA	NA	NA	NA	NA	NA
763	CP021895.1	circular	5524	Bacteria	Proteobacteria	Gammaproteobacteria	Enterobacterales	Pectobacteriaceae	Pectobacterium	Pectobacterium carotovorum	Pectobacterium carotovorum strain SCC1 plasmid pSCC1, complete sequence	NA	1982	Finland	taxon:554	NA	Solanum tuberosum	NA	NA	genomic DNA	Pectobacterium carotovorum	pSCC1	SCC1	NA	NA	NA	NA	NA	NA	CFBP:8537	NA	NA	NA	NA	NA	NA	NA	NA	NA	NA	NA	NA	NA	NA	NA	NA	NA	NA	NA
764	CP022016.1	circular	473456	Bacteria	Proteobacteria	Gammaproteobacteria	Enterobacterales	Enterobacteriaceae	Salmonella	Salmonella enterica	Salmonella enterica subsp. enterica serovar India str. SA20085604 plasmid unnamed1, complete sequence	Laboratoire depidemiosurveillance animale du Quebec, Saint-Hyacinthe, QC	2008-09-01	Canada: Quebec: Saint-Hyacinthe	taxon:1242098	NA	NA	NA	NA	genomic DNA	Salmonella enterica subsp. enterica serovar India str. SA20085604	unnamed1	SA20085604	India	enterica	NA	NA	NA	NA	NA	NA	NA	NA	NA	NA	NA	NA	NA	NA	NA	NA	NA	NA	NA	NA	NA	NA	NA	NA
765	CP022017.1	circular	9815	Bacteria	Proteobacteria	Gammaproteobacteria	Enterobacterales	Enterobacteriaceae	Salmonella	Salmonella enterica	Salmonella enterica subsp. enterica serovar Quebec str. S-1267 plasmid punnamed2, complete sequence	National Microbiology Laboratory, Public Health Agency of Canada, Winnipeg, MB	NA	NA	taxon:1243591	NA	NA	NA	NA	genomic DNA	Salmonella enterica subsp. enterica serovar Quebec str. S-1267	punnamed2	S-1267	Quebec	enterica	NA	NA	NA	NA	NA	NA	NA	NA	NA	NA	NA	NA	NA	NA	NA	NA	NA	NA	NA	NA	NA	NA	NA	NA
766	CP022090.2	circular	38118	Bacteria	Proteobacteria	Gammaproteobacteria	Alteromonadales	Shewanellaceae	Shewanella	Shewanella sp. FDAARGOS_354	Shewanella sp. FDAARGOS_354 plasmid unnamed1, complete sequence	USAMRIID < UCC < NMRC	NA	NA	taxon:1930557	NA	NA	NA	NA	genomic DNA	Shewanella sp. FDAARGOS_354	unnamed1	FDAARGOS_354	NA	NA	NA	NA	NA	NA	FDA:FDAARGOS_354	NA	NA	NA	NA	NA	NA	NA	NA	NA	NA	NA	NA	NA	NA	NA	NA	NA	NA	NA
767	CP022125.1	circular	187721	Bacteria	Proteobacteria	Gammaproteobacteria	Enterobacterales	Enterobacteriaceae	Klebsiella	Klebsiella pneumoniae	Klebsiella pneumoniae strain DHQP1605752_NV plasmid p1605752FIB, complete sequence	Washoe County Health District	2016-08-19	USA: Nevada	taxon:573	NA	Homo sapiens	wound	NA	genomic DNA	Klebsiella pneumoniae	p1605752FIB	DHQP1605752_NV	NA	NA	NA	NA	type: MLST-15	NA	NA	NA	NA	NA	NA	NA	NA	NA	NA	NA	NA	NA	NA	NA	NA	NA	NA	NA	NA	NA
768	CP022126.1	circular	140133	Bacteria	Proteobacteria	Gammaproteobacteria	Enterobacterales	Enterobacteriaceae	Klebsiella	Klebsiella pneumoniae	Klebsiella pneumoniae strain DHQP1605752_NV plasmid p1605752AC2, complete sequence	Washoe County Health District	2016-08-19	USA: Nevada	taxon:573	NA	Homo sapiens	wound	NA	genomic DNA	Klebsiella pneumoniae	p1605752AC2	DHQP1605752_NV	NA	NA	NA	NA	type: MLST-15	NA	NA	NA	NA	NA	NA	NA	NA	NA	NA	NA	NA	NA	NA	NA	NA	NA	NA	NA	NA	NA
769	CP022128.1	circular	111692	Bacteria	Proteobacteria	Gammaproteobacteria	Enterobacterales	Enterobacteriaceae	Klebsiella	Klebsiella pneumoniae	Klebsiella pneumoniae strain DHQP1605752_NV plasmid p1605752FIB_2, complete sequence	Washoe County Health District	2016-08-19	USA: Nevada	taxon:573	NA	Homo sapiens	wound	NA	genomic DNA	Klebsiella pneumoniae	p1605752FIB_2	DHQP1605752_NV	NA	NA	NA	NA	type: MLST-15	NA	NA	NA	NA	NA	NA	NA	NA	NA	NA	NA	NA	NA	NA	NA	NA	NA	NA	NA	NA	NA
770	CP022284.1	circular	12381	Bacteria	Proteobacteria	Gammaproteobacteria	Pseudomonadales	Moraxellaceae	Acinetobacter	Acinetobacter baumannii	Acinetobacter baumannii strain 7804 plasmid pAba7804a, complete sequence	Hospital Universitario de Nuevo Leon	2006-07-05	Mexico: Monterrey, Nuevo Leon	taxon:470	NA	Homo sapiens	bronchoalveolar lavage fluid	NA	genomic DNA	Acinetobacter baumannii	pAba7804a	7804	NA	NA	NA	NA	NA	NA	NA	NA	NA	NA	NA	NA	NA	NA	NA	NA	NA	NA	NA	NA	NA	NA	NA	NA	NA	NA
771	CP022285.1	circular	170420	Bacteria	Proteobacteria	Gammaproteobacteria	Pseudomonadales	Moraxellaceae	Acinetobacter	Acinetobacter baumannii	Acinetobacter baumannii strain 7804 plasmid pAba7804b, complete sequence	Hospital Universitario de Nuevo Leon	2006-07-05	Mexico: Monterrey, Nuevo Leon	taxon:470	NA	Homo sapiens	bronchoalveolar lavage fluid	NA	genomic DNA	Acinetobacter baumannii	pAba7804b	7804	NA	NA	NA	NA	NA	NA	NA	NA	NA	NA	NA	NA	NA	NA	NA	NA	NA	NA	NA	NA	NA	NA	NA	NA	NA	NA
772	CP022320.1	circular	32110	Bacteria	Firmicutes	Bacilli	Bacillales	Bacillaceae	Bacillus	Bacillus altitudinis	Bacillus altitudinis strain SGAir0031 plasmid pSGAir0031, complete sequence	NA	2014-11-25	Singapore	taxon:293387	NA	NA	air	NA	genomic DNA	Bacillus altitudinis	pSGAir0031	SGAir0031	NA	NA	NA	NA	NA	NA	NA	NA	NA	NA	NA	NA	NA	NA	NA	NA	NA	NA	NA	NA	NA	NA	NA	NA	NA	NA
773	CP022357.1	circular	5539	Bacteria	Proteobacteria	Gammaproteobacteria	Vibrionales	Vibrionaceae	Paraphotobacterium	Paraphotobacterium marinum	Paraphotobacterium marinum strain NSCS20N07D plasmid p1, complete sequence	NA	15-May-2015	China:South China Sea	taxon:1755811	NA	NA	Surface seawater of South China Sea	NA	genomic DNA	Paraphotobacterium marinum	p1	NSCS20N07D	NA	NA	NA	NA	NA	NA	NA	NA	type strain of Paraphotobacterium marinum	NA	NA	NA	NA	NA	NA	NA	NA	NA	NA	NA	NA	NA	NA	NA	NA	NA
774	CP022456.1	circular	87762	Bacteria	Proteobacteria	Gammaproteobacteria	Enterobacterales	Enterobacteriaceae	Shigella	Shigella sonnei	Shigella sonnei strain 2015C-3794 plasmid unnamed1, complete sequence	CDC	NA	USA	taxon:624	NA	Homo sapiens	NA	NA	genomic DNA	Shigella sonnei	unnamed1	2015C-3794	NA	NA	NA	NA	NA	NA	NA	NA	NA	NA	NA	NA	NA	NA	NA	NA	NA	NA	NA	NA	NA	NA	NA	NA	NA	NA
775	CP022458.1	circular	55820	Bacteria	Proteobacteria	Gammaproteobacteria	Enterobacterales	Enterobacteriaceae	Shigella	Shigella sonnei	Shigella sonnei strain 2015C-3566 plasmid unnamed1, complete sequence	CDC	NA	USA	taxon:624	NA	Homo sapiens	NA	NA	genomic DNA	Shigella sonnei	unnamed1	2015C-3566	NA	NA	NA	NA	NA	NA	NA	NA	NA	NA	NA	NA	NA	NA	NA	NA	NA	NA	NA	NA	NA	NA	NA	NA	NA	NA
776	CP022460.1	circular	67979	Bacteria	Proteobacteria	Gammaproteobacteria	Enterobacterales	Enterobacteriaceae	Shigella	Shigella sonnei	Shigella sonnei strain 2015C-3807 plasmid unnamed1, complete sequence	CDC	NA	USA	taxon:624	NA	Homo sapiens	NA	NA	genomic DNA	Shigella sonnei	unnamed1	2015C-3807	NA	NA	NA	NA	NA	NA	NA	NA	NA	NA	NA	NA	NA	NA	NA	NA	NA	NA	NA	NA	NA	NA	NA	NA	NA	NA
777	CP022461.1	circular	66524	Bacteria	Proteobacteria	Gammaproteobacteria	Enterobacterales	Enterobacteriaceae	Shigella	Shigella sonnei	Shigella sonnei strain 2015C-3807 plasmid unnamed2, complete sequence	CDC	NA	USA	taxon:624	NA	Homo sapiens	NA	NA	genomic DNA	Shigella sonnei	unnamed2	2015C-3807	NA	NA	NA	NA	NA	NA	NA	NA	NA	NA	NA	NA	NA	NA	NA	NA	NA	NA	NA	NA	NA	NA	NA	NA	NA	NA
778	CP022517.1	circular	526773	Bacteria	Proteobacteria	Gammaproteobacteria	Enterobacterales	Erwiniaceae	Pantoea	Pantoea vagans	Pantoea vagans strain FBS135 plasmid unnamed1, complete sequence	NA	10-Apr-2016	China: Nanjing	taxon:470934	NA	masson pine	NA	NA	genomic DNA	Pantoea vagans	unnamed1	FBS135	NA	NA	NA	NA	NA	NA	NA	NA	NA	NA	NA	NA	NA	NA	NA	NA	NA	NA	NA	NA	NA	NA	NA	NA	NA	NA
779	CP022518.1	circular	196103	Bacteria	Proteobacteria	Gammaproteobacteria	Enterobacterales	Erwiniaceae	Pantoea	Pantoea vagans	Pantoea vagans strain FBS135 plasmid unnamed2, complete sequence	NA	10-Apr-2016	China: Nanjing	taxon:470934	NA	masson pine	NA	NA	genomic DNA	Pantoea vagans	unnamed2	FBS135	NA	NA	NA	NA	NA	NA	NA	NA	NA	NA	NA	NA	NA	NA	NA	NA	NA	NA	NA	NA	NA	NA	NA	NA	NA	NA
780	CP022519.1	circular	130944	Bacteria	Proteobacteria	Gammaproteobacteria	Enterobacterales	Erwiniaceae	Pantoea	Pantoea vagans	Pantoea vagans strain FBS135 plasmid unnamed3, complete sequence	NA	10-Apr-2016	China: Nanjing	taxon:470934	NA	masson pine	NA	NA	genomic DNA	Pantoea vagans	unnamed3	FBS135	NA	NA	NA	NA	NA	NA	NA	NA	NA	NA	NA	NA	NA	NA	NA	NA	NA	NA	NA	NA	NA	NA	NA	NA	NA	NA
781	CP022520.1	circular	72356	Bacteria	Proteobacteria	Gammaproteobacteria	Enterobacterales	Erwiniaceae	Pantoea	Pantoea vagans	Pantoea vagans strain FBS135 plasmid unnamed4, complete sequence	NA	10-Apr-2016	China: Nanjing	taxon:470934	NA	masson pine	NA	NA	genomic DNA	Pantoea vagans	unnamed4	FBS135	NA	NA	NA	NA	NA	NA	NA	NA	NA	NA	NA	NA	NA	NA	NA	NA	NA	NA	NA	NA	NA	NA	NA	NA	NA	NA
782	CP022546.1	linear	51329	Bacteria	Actinobacteria	Actinobacteria	Streptomycetales	Streptomycetaceae	Streptomyces	Streptomyces sp. 11-1-2	Streptomyces sp. 11-1-2 plasmid unnamed1, complete sequence	NA	2011-11	Canada: Newfoundland	taxon:1851167	NA	Solanum tuberosum	Scab lesion on potato tuber	NA	genomic DNA	Streptomyces sp. 11-1-2	unnamed1	2002-01-11	NA	NA	NA	NA	NA	NA	NA	NA	NA	NA	NA	NA	NA	NA	NA	NA	NA	NA	NA	NA	NA	NA	NA	NA	NA	NA
783	CP022581.1	circular	105060	Bacteria	Actinobacteria	Actinobacteria	Corynebacteriales	Gordoniaceae	Gordonia	Gordonia rubripertincta	Gordonia rubripertincta strain CWB2 plasmid pGCWB2, complete sequence	Drik Tischler	2007-12-20	Germany: Freiberg	taxon:36822	NA	NA	soil	50.92500 N 13.33333 E	genomic DNA	Gordonia rubripertincta	pGCWB2	CWB2	NA	NA	NA	NA	NA	NA	NA	NA	NA	NA	NA	NA	NA	NA	NA	NA	NA	NA	NA	NA	NA	NA	NA	NA	NA	NA
784	CP022681.1	circular	26370	Bacteria	Firmicutes	Bacilli	Lactobacillales	Streptococcaceae	Streptococcus	Streptococcus respiraculi	Streptococcus respiraculi strain HTS25 plasmid unnamed1, complete sequence	NA	2015-10-30	China:Qinghai-Tibet Plateau	taxon:2021971	NA	Marmota himalayana	NA	NA	genomic DNA	Streptococcus respiraculi	unnamed1	HTS25	NA	NA	NA	NA	NA	NA	NA	NA	NA	NA	NA	NA	NA	NA	NA	NA	NA	NA	NA	NA	NA	NA	NA	NA	NA	NA
785	CP022703.1	circular	2069295	Bacteria	Proteobacteria	Betaproteobacteria	Burkholderiales	Burkholderiaceae	Ralstonia	Ralstonia solanacearum	Ralstonia solanacearum strain 10319 plasmid p10319MP, complete sequence	NA	2008-03	Philippines: Los Banos	taxon:305	NA	Solanum lycopersicum	bacterial wilt-infected tomatoes	14.1667 N 121.2167 E	genomic DNA	Ralstonia solanacearum	p10319MP	10319	NA	NA	NA	NA	NA	NA	NA	NA	NA	NA	NA	NA	NA	NA	NA	NA	NA	NA	NA	NA	NA	NA	NA	NA	NA	NA
786	CP022716.1	circular	7699	Bacteria	Proteobacteria	Gammaproteobacteria	Pasteurellales	Pasteurellaceae	Actinobacillus	Actinobacillus pleuropneumoniae	Actinobacillus pleuropneumoniae strain KL 16 plasmid unnamed1, complete sequence	NA	2017	South Korea	taxon:715	NA	Porcine	Lung	NA	genomic DNA	Actinobacillus pleuropneumoniae	unnamed1	KL 16	NA	NA	NA	NA	NA	NA	NA	NA	NA	NA	NA	NA	NA	NA	NA	NA	NA	NA	NA	NA	NA	NA	NA	NA	NA	NA
787	CP023058.1	circular	10207	Bacteria	Proteobacteria	Gammaproteobacteria	Pasteurellales	Pasteurellaceae	Glaesserella	Glaesserella sp. 15-184	Glaesserella sp. 15-184 plasmid unnamed1, complete sequence	Faculty of Agricultural and Veterinary Sciences Melbourne University	2015-04	Australia: Victoria	taxon:2030797	NA	Sus scrofa	NA	NA	genomic DNA	Glaesserella sp. 15-184	unnamed1	15-184	NA	NA	NA	NA	NA	Rhys Bushell	NA	NA	NA	NA	NA	NA	NA	NA	NA	NA	NA	NA	NA	NA	NA	NA	NA	NA	NA	NA
788	CP023059.1	circular	2645	Bacteria	Proteobacteria	Gammaproteobacteria	Pasteurellales	Pasteurellaceae	Glaesserella	Glaesserella sp. 15-184	Glaesserella sp. 15-184 plasmid unnamed2, complete sequence	Faculty of Agricultural and Veterinary Sciences Melbourne University	2015-04	Australia: Victoria	taxon:2030797	NA	Sus scrofa	NA	NA	genomic DNA	Glaesserella sp. 15-184	unnamed2	15-184	NA	NA	NA	NA	NA	Rhys Bushell	NA	NA	NA	NA	NA	NA	NA	NA	NA	NA	NA	NA	NA	NA	NA	NA	NA	NA	NA	NA
789	CP023060.1	circular	2365	Bacteria	Proteobacteria	Gammaproteobacteria	Pasteurellales	Pasteurellaceae	Glaesserella	Glaesserella sp. 15-184	Glaesserella sp. 15-184 plasmid unnamed3, complete sequence	Faculty of Agricultural and Veterinary Sciences Melbourne University	2015-04	Australia: Victoria	taxon:2030797	NA	Sus scrofa	NA	NA	genomic DNA	Glaesserella sp. 15-184	unnamed3	15-184	NA	NA	NA	NA	NA	Rhys Bushell	NA	NA	NA	NA	NA	NA	NA	NA	NA	NA	NA	NA	NA	NA	NA	NA	NA	NA	NA	NA
790	CP023135.2	circular	211454	Bacteria	Proteobacteria	Gammaproteobacteria	Enterobacterales	Enterobacteriaceae	Klebsiella	Klebsiella pneumoniae	Klebsiella pneumoniae subsp. pneumoniae strain KpvK54 plasmid pKpvK54, complete sequence	St. Georges Hospital	01-May-2017	United Kingdom	taxon:72407	NA	Homo sapiens	Pus	51.42 N 0.17 W	genomic DNA	Klebsiella pneumoniae subsp. pneumoniae	pKpvK54	KpvK54	NA	pneumoniae	NA	NA	genotype: ST2849	NA	NA	K54	NA	NA	NA	NA	NA	NA	NA	NA	NA	NA	NA	NA	NA	NA	NA	NA	NA	NA
791	CP023246.1	circular	546185	Bacteria	Firmicutes	Bacilli	Bacillales	Bacillaceae	Bacillus	Bacillus cereus	Bacillus cereus strain HBL-AI plasmid unnamed1, complete sequence	NA	2016-07-07	China: Baoding	taxon:1396	NA	bacteria	air in Laboratory	NA	genomic DNA	Bacillus cereus	unnamed1	HBL-AI	NA	NA	NA	NA	isolated by gradient dilution	NA	NA	NA	NA	NA	NA	NA	NA	NA	NA	NA	NA	NA	NA	NA	NA	NA	NA	NA	NA	NA
792	CP023428.1	circular	6610	Bacteria	Firmicutes	Bacilli	Bacillales	Bacillaceae	Bacillus	Bacillus subtilis	Bacillus subtilis strain TLO3 plasmid pBsTLO3, complete sequence	NA	2017-04-10	China:Gansu	taxon:1423	NA	Homo sapiens	dental plaque	36.03 N 103.5 E	genomic DNA	Bacillus subtilis	pBsTLO3	TLO3	NA	NA	NA	NA	NA	NA	NA	NA	NA	NA	NA	NA	NA	NA	NA	NA	NA	NA	NA	NA	NA	NA	NA	NA	NA	NA
793	CP023447.1	circular	103409	Bacteria	Proteobacteria	Epsilonproteobacteria	Campylobacterales	Campylobacteraceae	Campylobacter	Campylobacter jejuni	Campylobacter jejuni strain 100 plasmid pJc100, complete sequence	NA	2016	Brazil:Pelotas	taxon:197	NA	chicken	NA	NA	genomic DNA	Campylobacter jejuni	pJc100	100	NA	NA	NA	NA	NA	NA	NA	NA	NA	NA	NA	NA	NA	NA	NA	NA	NA	NA	NA	NA	NA	NA	NA	NA	NA	NA
794	CP023542.1	circular	161452	Bacteria	Proteobacteria	Gammaproteobacteria	Enterobacterales	Enterobacteriaceae	Escherichia	Escherichia coli	Escherichia coli O104:H21 str. CFSAN002236 plasmid pO104_H21, complete sequence	FDA	1994	USA: MT	taxon:1335303	NA	Homo sapiens	stool	NA	genomic DNA	Escherichia coli O104:H21 str. CFSAN002236	pO104_H21	CFSAN002236	NA	NA	NA	NA	NA	NA	ATCC:BAA-178	NA	NA	NA	NA	NA	NA	NA	NA	NA	NA	NA	NA	NA	NA	NA	NA	NA	NA	NA
795	CP023646.1	circular	214673	Bacteria	Proteobacteria	Gammaproteobacteria	Enterobacterales	Enterobacteriaceae	Shigella	Shigella sonnei	Shigella sonnei strain CFSAN030807 plasmid pCFSAN030807_1, complete sequence	NA	NA	Somalia	taxon:624	NA	Homo sapiens	NA	NA	genomic DNA	Shigella sonnei	pCFSAN030807_1	CFSAN030807	Serotype group D	NA	NA	NA	NA	NA	NA	NA	NA	NA	NA	NA	NA	NA	NA	NA	NA	NA	NA	NA	NA	NA	NA	NA	NA	NA
796	CP023647.1	circular	8401	Bacteria	Proteobacteria	Gammaproteobacteria	Enterobacterales	Enterobacteriaceae	Shigella	Shigella sonnei	Shigella sonnei strain CFSAN030807 plasmid pCFSAN030807_2, complete sequence	NA	NA	Somalia	taxon:624	NA	Homo sapiens	NA	NA	genomic DNA	Shigella sonnei	pCFSAN030807_2	CFSAN030807	Serotype group D	NA	NA	NA	NA	NA	NA	NA	NA	NA	NA	NA	NA	NA	NA	NA	NA	NA	NA	NA	NA	NA	NA	NA	NA	NA
797	CP023648.1	circular	2136	Bacteria	Proteobacteria	Gammaproteobacteria	Enterobacterales	Enterobacteriaceae	Shigella	Shigella sonnei	Shigella sonnei strain CFSAN030807 plasmid pCFSAN030807_3, complete sequence	NA	NA	Somalia	taxon:624	NA	Homo sapiens	NA	NA	genomic DNA	Shigella sonnei	pCFSAN030807_3	CFSAN030807	Serotype group D	NA	NA	NA	NA	NA	NA	NA	NA	NA	NA	NA	NA	NA	NA	NA	NA	NA	NA	NA	NA	NA	NA	NA	NA	NA
798	CP023649.1	circular	7098	Bacteria	Proteobacteria	Gammaproteobacteria	Enterobacterales	Enterobacteriaceae	Shigella	Shigella sonnei	Shigella sonnei strain CFSAN030807 plasmid pCFSAN030807_4, complete sequence	NA	NA	Somalia	taxon:624	NA	Homo sapiens	NA	NA	genomic DNA	Shigella sonnei	pCFSAN030807_4	CFSAN030807	Serotype group D	NA	NA	NA	NA	NA	NA	NA	NA	NA	NA	NA	NA	NA	NA	NA	NA	NA	NA	NA	NA	NA	NA	NA	NA	NA
799	CP023650.1	circular	5153	Bacteria	Proteobacteria	Gammaproteobacteria	Enterobacterales	Enterobacteriaceae	Shigella	Shigella sonnei	Shigella sonnei strain CFSAN030807 plasmid pCFSAN030807_5, complete sequence	NA	NA	Somalia	taxon:624	NA	Homo sapiens	NA	NA	genomic DNA	Shigella sonnei	pCFSAN030807_5	CFSAN030807	Serotype group D	NA	NA	NA	NA	NA	NA	NA	NA	NA	NA	NA	NA	NA	NA	NA	NA	NA	NA	NA	NA	NA	NA	NA	NA	NA
800	CP023651.1	circular	5114	Bacteria	Proteobacteria	Gammaproteobacteria	Enterobacterales	Enterobacteriaceae	Shigella	Shigella sonnei	Shigella sonnei strain CFSAN030807 plasmid pCFSAN030807_6, complete sequence	NA	NA	Somalia	taxon:624	NA	Homo sapiens	NA	NA	genomic DNA	Shigella sonnei	pCFSAN030807_6	CFSAN030807	Serotype group D	NA	NA	NA	NA	NA	NA	NA	NA	NA	NA	NA	NA	NA	NA	NA	NA	NA	NA	NA	NA	NA	NA	NA	NA	NA
801	CP023652.1	circular	4238	Bacteria	Proteobacteria	Gammaproteobacteria	Enterobacterales	Enterobacteriaceae	Shigella	Shigella sonnei	Shigella sonnei strain CFSAN030807 plasmid pCFSAN030807_7, complete sequence	NA	NA	Somalia	taxon:624	NA	Homo sapiens	NA	NA	genomic DNA	Shigella sonnei	pCFSAN030807_7	CFSAN030807	Serotype group D	NA	NA	NA	NA	NA	NA	NA	NA	NA	NA	NA	NA	NA	NA	NA	NA	NA	NA	NA	NA	NA	NA	NA	NA	NA
802	CP023653.1	circular	2690	Bacteria	Proteobacteria	Gammaproteobacteria	Enterobacterales	Enterobacteriaceae	Shigella	Shigella sonnei	Shigella sonnei strain CFSAN030807 plasmid pCFSAN030807_8, complete sequence	NA	NA	Somalia	taxon:624	NA	Homo sapiens	NA	NA	genomic DNA	Shigella sonnei	pCFSAN030807_8	CFSAN030807	Serotype group D	NA	NA	NA	NA	NA	NA	NA	NA	NA	NA	NA	NA	NA	NA	NA	NA	NA	NA	NA	NA	NA	NA	NA	NA	NA
803	CP023723.1	circular	297984	Bacteria	Proteobacteria	Gammaproteobacteria	Enterobacterales	Enterobacteriaceae	Klebsiella	Klebsiella pneumoniae	Klebsiella pneumoniae strain TVGHCRE225 plasmid unnamed1, complete sequence	Taipei Veterans General Hospital	13-Aug-2014	Taiwan: Taipei	taxon:573	NA	Homo sapiens	intraabdominal abscess	25.1195 N 121.5201 E	genomic DNA	Klebsiella pneumoniae	unnamed1	TVGHCRE225	NA	NA	NA	NA	NA	NA	NA	NA	NA	NA	NA	NA	NA	NA	NA	NA	NA	NA	NA	NA	NA	NA	NA	NA	NA	NA
804	CP023724.1	circular	159072	Bacteria	Proteobacteria	Gammaproteobacteria	Enterobacterales	Enterobacteriaceae	Klebsiella	Klebsiella pneumoniae	Klebsiella pneumoniae strain TVGHCRE225 plasmid unnamed2, complete sequence	Taipei Veterans General Hospital	13-Aug-2014	Taiwan: Taipei	taxon:573	NA	Homo sapiens	intraabdominal abscess	25.1195 N 121.5201 E	genomic DNA	Klebsiella pneumoniae	unnamed2	TVGHCRE225	NA	NA	NA	NA	NA	NA	NA	NA	NA	NA	NA	NA	NA	NA	NA	NA	NA	NA	NA	NA	NA	NA	NA	NA	NA	NA
805	CP023725.1	circular	103454	Bacteria	Proteobacteria	Gammaproteobacteria	Enterobacterales	Enterobacteriaceae	Klebsiella	Klebsiella pneumoniae	Klebsiella pneumoniae strain TVGHCRE225 plasmid unnamed3, complete sequence	Taipei Veterans General Hospital	13-Aug-2014	Taiwan: Taipei	taxon:573	NA	Homo sapiens	intraabdominal abscess	25.1195 N 121.5201 E	genomic DNA	Klebsiella pneumoniae	unnamed3	TVGHCRE225	NA	NA	NA	NA	NA	NA	NA	NA	NA	NA	NA	NA	NA	NA	NA	NA	NA	NA	NA	NA	NA	NA	NA	NA	NA	NA
806	CP023879.1	circular	196943	Bacteria	Proteobacteria	Gammaproteobacteria	Enterobacterales	Enterobacteriaceae	Klebsiella	Klebsiella oxytoca	Klebsiella oxytoca strain FDAARGOS_430 plasmid unnamed1, complete sequence	BC Centre for Disease Control	2015-06-01	Canada: BC	taxon:571	NA	Homo sapiens	Rectal	NA	genomic DNA	Klebsiella oxytoca	unnamed1	FDAARGOS_430	NA	NA	NA	NA	NA	NA	FDA:FDAARGOS_430	NA	NA	NA	NA	NA	NA	NA	NA	NA	NA	NA	NA	NA	NA	NA	NA	NA	NA	NA
807	CP023880.1	circular	10345	Bacteria	Proteobacteria	Gammaproteobacteria	Enterobacterales	Enterobacteriaceae	Klebsiella	Klebsiella oxytoca	Klebsiella oxytoca strain FDAARGOS_430 plasmid unnamed2, complete sequence	BC Centre for Disease Control	2015-06-01	Canada: BC	taxon:571	NA	Homo sapiens	Rectal	NA	genomic DNA	Klebsiella oxytoca	unnamed2	FDAARGOS_430	NA	NA	NA	NA	NA	NA	FDA:FDAARGOS_430	NA	NA	NA	NA	NA	NA	NA	NA	NA	NA	NA	NA	NA	NA	NA	NA	NA	NA	NA
808	CP023881.1	circular	4942	Bacteria	Proteobacteria	Gammaproteobacteria	Enterobacterales	Enterobacteriaceae	Klebsiella	Klebsiella oxytoca	Klebsiella oxytoca strain FDAARGOS_430 plasmid unnamed3, complete sequence	BC Centre for Disease Control	2015-06-01	Canada: BC	taxon:571	NA	Homo sapiens	Rectal	NA	genomic DNA	Klebsiella oxytoca	unnamed3	FDAARGOS_430	NA	NA	NA	NA	NA	NA	FDA:FDAARGOS_430	NA	NA	NA	NA	NA	NA	NA	NA	NA	NA	NA	NA	NA	NA	NA	NA	NA	NA	NA
809	CP024156.1	circular	60258	Bacteria	Proteobacteria	Gammaproteobacteria	Enterobacterales	Enterobacteriaceae	Escherichia	Escherichia coli	Escherichia coli strain 14EC047 plasmid p14EC047a, complete sequence	NA	2014	China	taxon:562	NA	NA	clinical patient	NA	genomic DNA	Escherichia coli	p14EC047a	14EC047	NA	NA	NA	NA	NA	NA	NA	NA	NA	NA	NA	NA	NA	NA	NA	NA	NA	NA	NA	NA	NA	NA	NA	NA	NA	NA
810	CP024157.1	circular	88736	Bacteria	Proteobacteria	Gammaproteobacteria	Enterobacterales	Enterobacteriaceae	Escherichia	Escherichia coli	Escherichia coli strain 14EC047 plasmid p14EC047b, complete sequence	NA	2014	China	taxon:562	NA	NA	clinical patient	NA	genomic DNA	Escherichia coli	p14EC047b	14EC047	NA	NA	NA	NA	NA	NA	NA	NA	NA	NA	NA	NA	NA	NA	NA	NA	NA	NA	NA	NA	NA	NA	NA	NA	NA	NA
811	CP024158.1	circular	106324	Bacteria	Proteobacteria	Gammaproteobacteria	Enterobacterales	Enterobacteriaceae	Escherichia	Escherichia coli	Escherichia coli strain 14EC047 plasmid p14EC047c, complete sequence	NA	2014	China	taxon:562	NA	NA	clinical patient	NA	genomic DNA	Escherichia coli	p14EC047c	14EC047	NA	NA	NA	NA	NA	NA	NA	NA	NA	NA	NA	NA	NA	NA	NA	NA	NA	NA	NA	NA	NA	NA	NA	NA	NA	NA
812	CP024249.1	circular	167230	Bacteria	Proteobacteria	Gammaproteobacteria	Enterobacterales	Enterobacteriaceae	Escherichia	Escherichia coli	Escherichia coli O182:H21 strain D181 plasmid unnamed1, complete sequence	NA	1993/1994	Jordan	taxon:2048779	NA	NA	NA	NA	genomic DNA	Escherichia coli O182:H21	unnamed1	D181	NA	NA	NA	NA	NA	NA	NA	O182:H21	NA	NA	NA	NA	NA	NA	NA	NA	NA	NA	NA	NA	NA	NA	NA	NA	NA	NA
813	CP024250.1	circular	99099	Bacteria	Proteobacteria	Gammaproteobacteria	Enterobacterales	Enterobacteriaceae	Escherichia	Escherichia coli	Escherichia coli O182:H21 strain D181 plasmid unnamed2, complete sequence	NA	1993/1994	Jordan	taxon:2048779	NA	NA	NA	NA	genomic DNA	Escherichia coli O182:H21	unnamed2	D181	NA	NA	NA	NA	NA	NA	NA	O182:H21	NA	NA	NA	NA	NA	NA	NA	NA	NA	NA	NA	NA	NA	NA	NA	NA	NA	NA
814	CP024467.1	circular	54993	Bacteria	Proteobacteria	Gammaproteobacteria	Enterobacterales	Enterobacteriaceae	Shigella	Shigella dysenteriae	Shigella dysenteriae strain BU53M1 plasmid unnamed1, complete sequence	NA	1990	Burundi	taxon:622	NA	NA	NA	NA	genomic DNA	Shigella dysenteriae	unnamed1	BU53M1	NA	NA	NA	NA	NA	NA	NA	1	NA	NA	NA	NA	NA	NA	NA	NA	NA	NA	NA	NA	NA	NA	NA	NA	NA	NA
815	CP024468.1	circular	115922	Bacteria	Proteobacteria	Gammaproteobacteria	Enterobacterales	Enterobacteriaceae	Shigella	Shigella dysenteriae	Shigella dysenteriae strain BU53M1 plasmid pBU53M1, complete sequence	NA	1990	Burundi	taxon:622	NA	NA	NA	NA	genomic DNA	Shigella dysenteriae	pBU53M1	BU53M1	NA	NA	NA	NA	NA	NA	NA	1	NA	NA	NA	NA	NA	NA	NA	NA	NA	NA	NA	NA	NA	NA	NA	NA	NA	NA
816	CP024469.1	circular	184894	Bacteria	Proteobacteria	Gammaproteobacteria	Enterobacterales	Enterobacteriaceae	Shigella	Shigella dysenteriae	Shigella dysenteriae strain BU53M1 plasmid unnamed3, complete sequence	NA	1990	Burundi	taxon:622	NA	NA	NA	NA	genomic DNA	Shigella dysenteriae	unnamed3	BU53M1	NA	NA	NA	NA	NA	NA	NA	1	NA	NA	NA	NA	NA	NA	NA	NA	NA	NA	NA	NA	NA	NA	NA	NA	NA	NA
817	CP024471.1	circular	97011	Bacteria	Proteobacteria	Gammaproteobacteria	Enterobacterales	Enterobacteriaceae	Shigella	Shigella flexneri	Shigella flexneri strain 71-2783 plasmid unnamed1, complete sequence	NA	NA	NA	taxon:623	NA	NA	NA	NA	genomic DNA	Shigella flexneri	unnamed1	71-2783	NA	NA	NA	NA	NA	NA	NA	3a	NA	NA	NA	NA	NA	NA	NA	NA	NA	NA	NA	NA	NA	NA	NA	NA	NA	NA
818	CP024472.1	circular	159299	Bacteria	Proteobacteria	Gammaproteobacteria	Enterobacterales	Enterobacteriaceae	Shigella	Shigella flexneri	Shigella flexneri strain 71-2783 plasmid unnamed2, complete sequence	NA	NA	NA	taxon:623	NA	NA	NA	NA	genomic DNA	Shigella flexneri	unnamed2	71-2783	NA	NA	NA	NA	NA	NA	NA	3a	NA	NA	NA	NA	NA	NA	NA	NA	NA	NA	NA	NA	NA	NA	NA	NA	NA	NA
819	CP024474.1	circular	69554	Bacteria	Proteobacteria	Gammaproteobacteria	Enterobacterales	Enterobacteriaceae	Shigella	Shigella flexneri	Shigella flexneri 7b strain 94-3007 plasmid unnamed1, complete sequence	NA	NA	NA	taxon:2049486	NA	NA	NA	NA	genomic DNA	Shigella flexneri 7b	unnamed1	94-3007	NA	NA	NA	NA	NA	NA	NA	7b	NA	NA	NA	NA	NA	NA	NA	NA	NA	NA	NA	NA	NA	NA	NA	NA	NA	NA
820	CP024475.1	circular	82833	Bacteria	Proteobacteria	Gammaproteobacteria	Enterobacterales	Enterobacteriaceae	Shigella	Shigella flexneri	Shigella flexneri 7b strain 94-3007 plasmid unnamed2, complete sequence	NA	NA	NA	taxon:2049486	NA	NA	NA	NA	genomic DNA	Shigella flexneri 7b	unnamed2	94-3007	NA	NA	NA	NA	NA	NA	NA	7b	NA	NA	NA	NA	NA	NA	NA	NA	NA	NA	NA	NA	NA	NA	NA	NA	NA	NA
821	CP024476.1	circular	220282	Bacteria	Proteobacteria	Gammaproteobacteria	Enterobacterales	Enterobacteriaceae	Shigella	Shigella flexneri	Shigella flexneri 7b strain 94-3007 plasmid unnamed3, complete sequence	NA	NA	NA	taxon:2049486	NA	NA	NA	NA	genomic DNA	Shigella flexneri 7b	unnamed3	94-3007	NA	NA	NA	NA	NA	NA	NA	7b	NA	NA	NA	NA	NA	NA	NA	NA	NA	NA	NA	NA	NA	NA	NA	NA	NA	NA
822	CP024782.1	circular	25840	Bacteria	Firmicutes	Bacilli	Lactobacillales	Lactobacillaceae	Lactobacillus	Lactobacillus johnsonii	Lactobacillus johnsonii pf01 plasmid pLJPF01L, complete sequence	NA	NA	NA	taxon:1037411	NA	pig	NA	NA	genomic DNA	Lactobacillus johnsonii pf01	pLJPF01L	pf01	NA	NA	NA	NA	NA	NA	NA	NA	NA	NA	NA	NA	NA	NA	NA	NA	NA	NA	NA	NA	NA	NA	NA	NA	NA	NA
823	CP024783.1	circular	13905	Bacteria	Firmicutes	Bacilli	Lactobacillales	Lactobacillaceae	Lactobacillus	Lactobacillus johnsonii	Lactobacillus johnsonii pf01 plasmid pLJPF01S, complete sequence	NA	NA	NA	taxon:1037411	NA	pig	NA	NA	genomic DNA	Lactobacillus johnsonii pf01	pLJPF01S	pf01	NA	NA	NA	NA	NA	NA	NA	NA	NA	NA	NA	NA	NA	NA	NA	NA	NA	NA	NA	NA	NA	NA	NA	NA	NA	NA
824	CP024909.1	circular	108404	Bacteria	Proteobacteria	Gammaproteobacteria	Enterobacterales	Enterobacteriaceae	Enterobacter	Enterobacter cloacae	Enterobacter cloacae strain OSUKPC4_L plasmid pOSUEC_L, complete sequence	The Ohio State University College of Veterinary Medicine	2016-09-09	USA: Ohio, Columbus	taxon:550	NA	Canis lupus familiaris	Bite Wound	40.0142 N 83.0309 W	genomic DNA	Enterobacter cloacae	pOSUEC_L	OSUKPC4_L	NA	NA	NA	NA	NA	NA	NA	NA	NA	NA	NA	NA	NA	NA	NA	NA	NA	NA	NA	NA	NA	NA	NA	NA	NA	NA
825	CP024910.1	circular	351806	Bacteria	Proteobacteria	Gammaproteobacteria	Enterobacterales	Enterobacteriaceae	Enterobacter	Enterobacter cloacae	Enterobacter cloacae strain OSUKPC4_L plasmid pOSUKPC4, complete sequence	The Ohio State University College of Veterinary Medicine	2016-09-09	USA: Ohio, Columbus	taxon:550	NA	Canis lupus familiaris	Bite Wound	40.0142 N 83.0309 W	genomic DNA	Enterobacter cloacae	pOSUKPC4	OSUKPC4_L	NA	NA	NA	NA	NA	NA	NA	NA	NA	NA	NA	NA	NA	NA	NA	NA	NA	NA	NA	NA	NA	NA	NA	NA	NA	NA
826	CP024913.1	circular	86432	Bacteria	Cyanobacteria	NA	Chroococcales	Cyanobacteriaceae	Cyanobacterium	Cyanobacterium sp. HL-69	Cyanobacterium sp. HL-69 plasmid pCHL69-1, complete sequence	NA	14-Dec-2012	NA	taxon:2054282	NA	NA	enrichment cultures from UCC Lynda-Stan	NA	genomic DNA	Cyanobacterium sp. HL-69	pCHL69-1	NA	NA	NA	NA	HL-69	NA	NA	NA	NA	NA	NA	NA	NA	NA	NA		NA	NA	NA	NA	NA	NA	NA	NA	NA	NA	NA
827	CP024914.1	circular	55266	Bacteria	Cyanobacteria	NA	Chroococcales	Cyanobacteriaceae	Cyanobacterium	Cyanobacterium sp. HL-69	Cyanobacterium sp. HL-69 plasmid pCHL69-2, complete sequence	NA	14-Dec-2012	NA	taxon:2054282	NA	NA	enrichment cultures from UCC Lynda-Stan	NA	genomic DNA	Cyanobacterium sp. HL-69	pCHL69-2	NA	NA	NA	NA	HL-69	NA	NA	NA	NA	NA	NA	NA	NA	NA	NA		NA	NA	NA	NA	NA	NA	NA	NA	NA	NA	NA
828	CP025075.1	circular	28002	Bacteria	Firmicutes	Bacilli	Bacillales	Bacillaceae	Geobacillus	Bacillus caldolyticus	[Bacillus] caldolyticus strain NEB414 plasmid pBcl1, complete sequence	Tony Atkinson	1978	United Kingdom	taxon:1394	NA	NA	agar plate	NA	genomic DNA	Bacillus caldolyticus	pBcl1	NEB414	NA	NA	NA	NA	NA	Tony Atkinson	NA	NA	NA	NA	NA	NA	NA	NA	NA	NA	NA	NA	NA	NA	NA	NA	NA	NA	NA	NA
829	CP025139.1	circular	103103	Bacteria	Proteobacteria	Gammaproteobacteria	Enterobacterales	Enterobacteriaceae	Escherichia	Escherichia coli	Escherichia coli strain BH100L substr. MG2017 plasmid pBH100alpha, complete sequence	Edmar Chartone Souza	1974	Brazil: Belo Horizonte	taxon:562	NA	Homo sapiens	urine	19.9245 S 43.9352 W	genomic DNA	Escherichia coli	pBH100alpha	BH100L	NA	NA	NA	NA	NA	NA	NA	NA	NA	NA	NA	NA	NA	NA	NA	MG2017	NA	NA	NA	NA	NA	NA	NA	NA	NA	NA
830	CP025212.1	circular	145759	Bacteria	Proteobacteria	Gammaproteobacteria	Enterobacterales	Enterobacteriaceae	Klebsiella	Klebsiella pneumoniae	Klebsiella pneumoniae strain HZW25 plasmid unnamed1, complete sequence	Chen Qiong	2016-03-05	China: Hangzhou	taxon:573	NA	Homo sapiens	blie	30.26 N 120.19 E	genomic DNA	Klebsiella pneumoniae	unnamed1	HZW25	NA	NA	NA	NA	NA	NA	NA	NA	NA	NA	NA	NA	NA	NA	NA	NA	NA	NA	NA	NA	NA	NA	NA	NA	NA	NA
831	CP025213.1	circular	103957	Bacteria	Proteobacteria	Gammaproteobacteria	Enterobacterales	Enterobacteriaceae	Klebsiella	Klebsiella pneumoniae	Klebsiella pneumoniae strain HZW25 plasmid unnamed2, complete sequence	Chen Qiong	2016-03-05	China: Hangzhou	taxon:573	NA	Homo sapiens	blie	30.26 N 120.19 E	genomic DNA	Klebsiella pneumoniae	unnamed2	HZW25	NA	NA	NA	NA	NA	NA	NA	NA	NA	NA	NA	NA	NA	NA	NA	NA	NA	NA	NA	NA	NA	NA	NA	NA	NA	NA
832	CP025214.1	circular	87395	Bacteria	Proteobacteria	Gammaproteobacteria	Enterobacterales	Enterobacteriaceae	Klebsiella	Klebsiella pneumoniae	Klebsiella pneumoniae strain HZW25 plasmid unnamed3, complete sequence	Chen Qiong	2016-03-05	China: Hangzhou	taxon:573	NA	Homo sapiens	blie	30.26 N 120.19 E	genomic DNA	Klebsiella pneumoniae	unnamed3	HZW25	NA	NA	NA	NA	NA	NA	NA	NA	NA	NA	NA	NA	NA	NA	NA	NA	NA	NA	NA	NA	NA	NA	NA	NA	NA	NA
833	CP025215.1	circular	68637	Bacteria	Proteobacteria	Gammaproteobacteria	Enterobacterales	Enterobacteriaceae	Klebsiella	Klebsiella pneumoniae	Klebsiella pneumoniae strain HZW25 plasmid unnamed4, complete sequence	Chen Qiong	2016-03-05	China: Hangzhou	taxon:573	NA	Homo sapiens	blie	30.26 N 120.19 E	genomic DNA	Klebsiella pneumoniae	unnamed4	HZW25	NA	NA	NA	NA	NA	NA	NA	NA	NA	NA	NA	NA	NA	NA	NA	NA	NA	NA	NA	NA	NA	NA	NA	NA	NA	NA
834	CP025254.1	circular	102316	Bacteria	Proteobacteria	Gammaproteobacteria	Enterobacterales	Enterobacteriaceae	Escherichia	Escherichia coli	Escherichia coli strain BH100L substr. MG2014 plasmid pBH100alpha, complete sequence	Edmar Chartone Souza	1974	Brazil: Belo Horizonte	taxon:562	NA	Homo sapiens	urine	19.9245 S 43.9352 W	genomic DNA	Escherichia coli	pBH100alpha	BH100L	NA	NA	NA	NA	NA	NA	NA	NA	NA	NA	NA	NA	NA	NA	NA	MG2014	NA	NA	NA	NA	NA	NA	NA	NA	NA	NA
835	CP025255.1	circular	119751	Bacteria	Proteobacteria	Gammaproteobacteria	Enterobacterales	Enterobacteriaceae	Salmonella	Salmonella enterica	Salmonella enterica subsp. enterica serovar Newport str. CDC 2010K-2159 plasmid pSNE1-2010K-2159, complete sequence	CDC	Aug-2010	USA: BIFSCo Region 7	taxon:1454627	NA	Homo sapiens	stool	NA	genomic DNA	Salmonella enterica subsp. enterica serovar Newport str. CDC 2010K-2159	pSNE1-2010K-2159	CDC 2010K-2159	Newport	enterica	NA	NA	NA	NA	NA	NA	NA	NA	NA	NA	NA	NA	NA	NA	NA	NA	NA	NA	NA	NA	NA	NA	NA	NA
836	CP025397.1	circular	16882	Bacteria	Firmicutes	Bacilli	Bacillales	Staphylococcaceae	Staphylococcus	Staphylococcus haemolyticus	Staphylococcus haemolyticus strain 83131B plasmid p83131A-B, complete sequence	UMCG	2016	Netherlands: Groningen	taxon:1283	NA	Homo sapiens	NA	53.2223 N 6.57377 E	genomic DNA	Staphylococcus haemolyticus	p83131A-B	83131B	NA	NA	NA	NA	NA	NA	NA	NA	NA	NA	NA	NA	NA	NA	NA	NA	NA	NA	NA	NA	NA	NA	NA	NA	NA	NA
837	CP025398.1	circular	2366	Bacteria	Firmicutes	Bacilli	Bacillales	Staphylococcaceae	Staphylococcus	Staphylococcus haemolyticus	Staphylococcus haemolyticus strain 83131B plasmid p83131B, complete sequence	UMCG	2016	Netherlands: Groningen	taxon:1283	NA	Homo sapiens	NA	53.2223 N 6.57377 E	genomic DNA	Staphylococcus haemolyticus	p83131B	83131B	NA	NA	NA	NA	NA	NA	NA	NA	NA	NA	NA	NA	NA	NA	NA	NA	NA	NA	NA	NA	NA	NA	NA	NA	NA	NA
838	CP025497.1	circular	61505	Bacteria	Firmicutes	Bacilli	Bacillales	Staphylococcaceae	Staphylococcus	Staphylococcus aureus	Staphylococcus aureus subsp. aureus strain 3020.C01 plasmid p3020.C01b, complete sequence	Uniformed Services University	2011-07-19	USA: Ft. Benning, Georgia	taxon:46170	NA	Homo sapiens	purulent abscess	32.3913 N 84.8229 W	genomic DNA	Staphylococcus aureus subsp. aureus	p3020.C01b	3020.C01	NA	aureus	NA	NA	NA	NA	NA	NA	NA	NA	NA	NA	NA	NA	NA	NA	NA	NA	NA	NA	NA	NA	NA	NA	NA	NA
839	CP025502.1	circular	81826	Bacteria	Firmicutes	Clostridia	Clostridiales	Clostridiaceae	Clostridium	Clostridium perfringens	Clostridium perfringens strain EHE-NE18 plasmid pJIR3535, complete sequence	NA	2002-07-30	Australia:Sealake	taxon:1502	NA	Gallus gallus	gut contents	NA	genomic DNA	Clostridium perfringens	pJIR3535	EHE-NE18	NA	NA	NA	NA	NA	NA	NA	NA	NA	NA	NA	NA	NA	NA	NA	NA	NA	NA	NA	NA	NA	NA	NA	NA	NA	NA
840	CP025503.1	circular	69606	Bacteria	Firmicutes	Clostridia	Clostridiales	Clostridiaceae	Clostridium	Clostridium perfringens	Clostridium perfringens strain EHE-NE18 plasmid pJIR3844, complete sequence	NA	2002-07-30	Australia:Sealake	taxon:1502	NA	Gallus gallus	gut contents	NA	genomic DNA	Clostridium perfringens	pJIR3844	EHE-NE18	NA	NA	NA	NA	NA	NA	NA	NA	NA	NA	NA	NA	NA	NA	NA	NA	NA	NA	NA	NA	NA	NA	NA	NA	NA	NA
841	CP025504.1	circular	48779	Bacteria	Firmicutes	Clostridia	Clostridiales	Clostridiaceae	Clostridium	Clostridium perfringens	Clostridium perfringens strain EHE-NE18 plasmid pJIR3537, complete sequence	NA	2002-07-30	Australia:Sealake	taxon:1502	NA	Gallus gallus	gut contents	NA	genomic DNA	Clostridium perfringens	pJIR3537	EHE-NE18	NA	NA	NA	NA	NA	NA	NA	NA	NA	NA	NA	NA	NA	NA	NA	NA	NA	NA	NA	NA	NA	NA	NA	NA	NA	NA
842	CP025516.1	circular	159714	Bacteria	Proteobacteria	Gammaproteobacteria	Enterobacterales	Enterobacteriaceae	Klebsiella	Klebsiella pneumoniae	Klebsiella pneumoniae strain 002SK2 plasmid p002SK2_A, complete sequence	NA	2016-01-01	Switzerland: Basel	taxon:573	NA	NA	water	47.5 N 7.6 E	genomic DNA	Klebsiella pneumoniae	p002SK2_A	002SK2	NA	NA	NA	NA	NA	NA	NA	NA	NA	NA	NA	NA	NA	NA	NA	NA	NA	NA	NA	NA	NA	NA	NA	NA	NA	NA
843	CP025517.1	circular	77809	Bacteria	Proteobacteria	Gammaproteobacteria	Enterobacterales	Enterobacteriaceae	Klebsiella	Klebsiella pneumoniae	Klebsiella pneumoniae strain 002SK2 plasmid p002SK2_B, complete sequence	NA	2016-01-01	Switzerland: Basel	taxon:573	NA	NA	water	47.5 N 7.6 E	genomic DNA	Klebsiella pneumoniae	p002SK2_B	002SK2	NA	NA	NA	NA	NA	NA	NA	NA	NA	NA	NA	NA	NA	NA	NA	NA	NA	NA	NA	NA	NA	NA	NA	NA	NA	NA
844	CP025617.1	circular	86829	Bacteria	Actinobacteria	Actinobacteria	Micrococcales	Micrococcaceae	Micrococcus	Micrococcus luteus	Micrococcus luteus strain SGAir0127 plasmid pSGAir0127, complete sequence	NA	2014-11-25	Singapore	taxon:1270	NA	NA	air	NA	genomic DNA	Micrococcus luteus	pSGAir0127	SGAir0127	NA	NA	NA	NA	NA	NA	NA	NA	NA	NA	NA	NA	NA	NA	NA	NA	NA	NA	NA	NA	NA	NA	NA	NA	NA	NA
845	CP025992.1	circular	117339	Bacteria	Firmicutes	Bacilli	Lactobacillales	Lactobacillaceae	Lactobacillus	Lactobacillus plantarum	Lactobacillus plantarum subsp. plantarum strain LB1-2 plasmid pLB1-2A, complete sequence	Andrew D. Montecillo	2006-06	Philippines: Los Banos	taxon:337330	NA	Apis mellifera	beehive	NA	genomic DNA	Lactobacillus plantarum subsp. plantarum	pLB1-2A	LB1-2	NA	plantarum	NA	NA	NA	Andrew D. Montecillo	NA	NA	NA	NA	NA	NA	NA	NA	NA	NA	NA	NA	NA	NA	NA	NA	NA	NA	NA	NA
846	CP026267.1	circular	53893	Bacteria	Proteobacteria	Alphaproteobacteria	Rhizobiales	Phyllobacteriaceae	Aminobacter	Aminobacter sp. MSH1	Aminobacter sp. MSH1 plasmid pBAM2, complete sequence	Maria S.Holtze	2007	Denmark: near Hvidovre	taxon:374606	NA	NA	soil from courtyard of a former plant nursery located above a BAM-contaminated aquifer	NA	genomic DNA	Aminobacter sp. MSH1	pBAM2	MSH1	NA	NA	NA	NA	NA	Sebastian R. Sorensen	NA	NA	NA	NA	NA	NA	NA	GEUS Denmark	NA	NA	NA	NA	NA	NA	NA	NA	NA	NA	NA	NA
847	CP026636.1	circular	24792	Bacteria	Firmicutes	Bacilli	Bacillales	Bacillaceae	Bacillus	Bacillus filamentosus	Bacillus filamentosus strain HL2HP6 plasmid pHL2HP61, complete sequence	Salma Mukhtar	2015-07	Pakistan: Khewra Salt Mine, Punjab	taxon:1402861	NA	Salsola stocksii	root endosphere	NA	genomic DNA	Bacillus filamentosus	pHL2HP61	HL2HP6	NA	NA	NA	NA	NA	NA	NA	NA	NA	NA	32.64 m	NA	NA	NA	NA	NA	NA	NA	NA	NA	NA	NA	NA	NA	NA	NA
848	CP026733.1	circular	51078	Bacteria	Proteobacteria	Gammaproteobacteria	Enterobacterales	Enterobacteriaceae	Shigella	Shigella boydii	Shigella boydii strain ATCC 8700 plasmid unnamed2, complete sequence	NA	NA	NA	taxon:621	NA	NA	NA	NA	genomic DNA	Shigella boydii	unnamed2	ATCC 8700	NA	NA	NA	NA	NA	NA	ATCC:8700	2	type strain of Shigella boydii	NA	NA	NA	NA	NA	NA	NA	NA	NA	NA	NA	NA	NA	NA	NA	NA	NA
849	CP026745.1	circular	142547	Bacteria	Actinobacteria	Actinobacteria	Corynebacteriales	Nocardiaceae	Nocardia	Nocardia cyriacigeorgica	Nocardia cyriacigeorgica strain MDA3349 plasmid p_unnamed, complete sequence	Heer Mehta	2016	USA: Texas	taxon:135487	NA	Homo sapiens	NA	29.7604 N 95.3698 W	genomic DNA	Nocardia cyriacigeorgica	p_unnamed	MDA3349	NA	NA	NA	NA	NA	NA	NA	NA	NA	NA	NA	NA	NA	NA	NA	NA	NA	NA	NA	NA	NA	NA	NA	NA	NA	NA
850	CP026764.1	circular	68319	Bacteria	Proteobacteria	Gammaproteobacteria	Enterobacterales	Enterobacteriaceae	Shigella	Shigella flexneri	Shigella flexneri strain 04-3145 plasmid unnamed, complete sequence	NA	NA	NA	taxon:623	NA	NA	NA	NA	genomic DNA	Shigella flexneri	unnamed	3145-04-01	NA	NA	NA	NA	NA	NA	NA	7	NA	NA	NA	NA	NA	NA	NA	NA	NA	NA	NA	NA	NA	NA	NA	NA	NA	NA
851	CP026771.1	circular	220759	Bacteria	Proteobacteria	Gammaproteobacteria	Enterobacterales	Enterobacteriaceae	Shigella	Shigella flexneri	Shigella flexneri Y strain 93-3063 plasmid unnamed3, complete sequence	NA	NA	NA	taxon:424720	NA	NA	NA	NA	genomic DNA	Shigella flexneri Y	unnamed3	93-3063	NA	NA	NA	NA	NA	NA	NA	Y	NA	NA	NA	NA	NA	NA	NA	NA	NA	NA	NA	NA	NA	NA	NA	NA	NA	NA
852	CP026775.1	circular	182697	Bacteria	Proteobacteria	Gammaproteobacteria	Enterobacterales	Enterobacteriaceae	Shigella	Shigella dysenteriae	Shigella dysenteriae strain ATCC 13313 plasmid unnamed, complete sequence	NA	NA	NA	taxon:622	NA	NA	NA	NA	genomic DNA	Shigella dysenteriae	unnamed	ATCC 13313	NA	NA	NA	NA	NA	NA	ATCC:13313	1	type strain of Shigella dysenteriae	NA	NA	NA	NA	NA	NA	NA	NA	NA	NA	NA	NA	NA	NA	NA	NA	NA
853	CP026779.1	circular	202417	Bacteria	Proteobacteria	Gammaproteobacteria	Enterobacterales	Enterobacteriaceae	Shigella	Shigella dysenteriae	Shigella dysenteriae strain 69-3818 plasmid unnamed2, complete sequence	NA	NA	NA	taxon:622	NA	NA	NA	NA	genomic DNA	Shigella dysenteriae	unnamed2	69-3818	NA	NA	NA	NA	NA	NA	NA	1	NA	NA	NA	NA	NA	NA	NA	NA	NA	NA	NA	NA	NA	NA	NA	NA	NA	NA
854	CP026783.1	circular	183210	Bacteria	Proteobacteria	Gammaproteobacteria	Enterobacterales	Enterobacteriaceae	Shigella	Shigella dysenteriae	Shigella dysenteriae strain 08-3380 plasmid unnamed, complete sequence	NA	NA	NA	taxon:622	NA	NA	NA	NA	genomic DNA	Shigella dysenteriae	unnamed	3380-08-01	NA	NA	NA	NA	NA	NA	NA	1	NA	NA	NA	NA	NA	NA	NA	NA	NA	NA	NA	NA	NA	NA	NA	NA	NA	NA
855	CP026789.1	circular	113130	Bacteria	Proteobacteria	Gammaproteobacteria	Enterobacterales	Enterobacteriaceae	Shigella	Shigella flexneri	Shigella flexneri 2a strain ATCC 29903 plasmid unnamed1, complete sequence	NA	NA	NA	taxon:42897	NA	NA	NA	NA	genomic DNA	Shigella flexneri 2a	unnamed1	ATCC 29903	NA	NA	NA	NA	NA	NA	ATCC:29903	2a	type strain of Shigella flexneri	NA	NA	NA	NA	NA	NA	NA	NA	NA	NA	NA	NA	NA	NA	NA	NA	NA
856	CP026790.1	circular	165702	Bacteria	Proteobacteria	Gammaproteobacteria	Enterobacterales	Enterobacteriaceae	Shigella	Shigella flexneri	Shigella flexneri 2a strain ATCC 29903 plasmid unnamed2, complete sequence	NA	NA	NA	taxon:42897	NA	NA	NA	NA	genomic DNA	Shigella flexneri 2a	unnamed2	ATCC 29903	NA	NA	NA	NA	NA	NA	ATCC:29903	2a	type strain of Shigella flexneri	NA	NA	NA	NA	NA	NA	NA	NA	NA	NA	NA	NA	NA	NA	NA	NA	NA
857	CP026791.1	circular	59834	Bacteria	Proteobacteria	Gammaproteobacteria	Enterobacterales	Enterobacteriaceae	Shigella	Shigella flexneri	Shigella flexneri strain 61-4982 plasmid unnamed, complete sequence	NA	NA	NA	taxon:623	NA	NA	NA	NA	genomic DNA	Shigella flexneri	unnamed	61-4982	NA	NA	NA	NA	NA	NA	NA	4b	NA	NA	NA	NA	NA	NA	NA	NA	NA	NA	NA	NA	NA	NA	NA	NA	NA	NA
858	CP026798.1	circular	146337	Bacteria	Proteobacteria	Gammaproteobacteria	Enterobacterales	Enterobacteriaceae	Shigella	Shigella boydii	Shigella boydii strain NCTC 9353 plasmid unnamed, complete sequence	NA	NA	NA	taxon:621	NA	NA	NA	NA	genomic DNA	Shigella boydii	unnamed	NCTC 9353	NA	NA	NA	NA	NA	NA	NCTC:9353	8	NA	NA	NA	NA	NA	NA	NA	NA	NA	NA	NA	NA	NA	NA	NA	NA	NA	NA
859	CP026800.1	circular	135368	Bacteria	Proteobacteria	Gammaproteobacteria	Enterobacterales	Enterobacteriaceae	Shigella	Shigella flexneri	Shigella flexneri strain NCTC 9728 plasmid unnamed, complete sequence	NA	NA	NA	taxon:623	NA	NA	NA	NA	genomic DNA	Shigella flexneri	unnamed	NCTC 9728	NA	NA	NA	NA	NA	NA	NCTC:9728	5b	NA	NA	NA	NA	NA	NA	NA	NA	NA	NA	NA	NA	NA	NA	NA	NA	NA	NA
860	CP026806.1	circular	69966	Bacteria	Proteobacteria	Gammaproteobacteria	Enterobacterales	Enterobacteriaceae	Shigella	Shigella dysenteriae	Shigella dysenteriae strain 2017C-4522 plasmid unnamed, complete sequence	NA	NA	NA	taxon:622	NA	NA	NA	NA	genomic DNA	Shigella dysenteriae	unnamed	2017C-4522	NA	NA	NA	NA	NA	NA	NA	Provisional 2009C-3478	NA	NA	NA	NA	NA	NA	NA	NA	NA	NA	NA	NA	NA	NA	NA	NA	NA	NA
861	CP026808.1	circular	79695	Bacteria	Proteobacteria	Gammaproteobacteria	Enterobacterales	Enterobacteriaceae	Shigella	Shigella dysenteriae	Shigella dysenteriae strain 204/96 plasmid unnamed1, complete sequence	NA	NA	NA	taxon:622	NA	NA	NA	NA	genomic DNA	Shigella dysenteriae	unnamed1	204/96	NA	NA	NA	NA	NA	NA	NA	Provisional 204/96	NA	NA	NA	NA	NA	NA	NA	NA	NA	NA	NA	NA	NA	NA	NA	NA	NA	NA
862	CP026809.1	circular	226481	Bacteria	Proteobacteria	Gammaproteobacteria	Enterobacterales	Enterobacteriaceae	Shigella	Shigella dysenteriae	Shigella dysenteriae strain 204/96 plasmid unnamed2, complete sequence	NA	NA	NA	taxon:622	NA	NA	NA	NA	genomic DNA	Shigella dysenteriae	unnamed2	204/96	NA	NA	NA	NA	NA	NA	NA	Provisional 204/96	NA	NA	NA	NA	NA	NA	NA	NA	NA	NA	NA	NA	NA	NA	NA	NA	NA	NA
863	CP026812.1	circular	181479	Bacteria	Proteobacteria	Gammaproteobacteria	Enterobacterales	Enterobacteriaceae	Shigella	Shigella flexneri	Shigella flexneri strain 64-5500 plasmid unnamed, complete sequence	NA	NA	NA	taxon:623	NA	NA	NA	NA	genomic DNA	Shigella flexneri	unnamed	64-5500	NA	NA	NA	NA	NA	NA	NA	6	NA	NA	NA	NA	NA	NA	NA	NA	NA	NA	NA	NA	NA	NA	NA	NA	NA	NA
864	CP026813.1	circular	122029	Bacteria	Proteobacteria	Gammaproteobacteria	Enterobacterales	Enterobacteriaceae	Shigella	Shigella boydii	Shigella boydii strain 83-578 plasmid unnamed, complete sequence	NA	NA	NA	taxon:621	NA	NA	NA	NA	genomic DNA	Shigella boydii	unnamed	83-578	NA	NA	NA	NA	NA	NA	NA	19	NA	NA	NA	NA	NA	NA	NA	NA	NA	NA	NA	NA	NA	NA	NA	NA	NA	NA
865	CP026816.1	circular	79553	Bacteria	Proteobacteria	Gammaproteobacteria	Enterobacterales	Enterobacteriaceae	Shigella	Shigella dysenteriae	Shigella dysenteriae strain 93-119 plasmid unnamed1, complete sequence	NA	NA	NA	taxon:622	NA	NA	NA	NA	genomic DNA	Shigella dysenteriae	unnamed1	93-119	NA	NA	NA	NA	NA	NA	NA	Provisional 93-119	NA	NA	NA	NA	NA	NA	NA	NA	NA	NA	NA	NA	NA	NA	NA	NA	NA	NA
866	CP026817.1	circular	226441	Bacteria	Proteobacteria	Gammaproteobacteria	Enterobacterales	Enterobacteriaceae	Shigella	Shigella dysenteriae	Shigella dysenteriae strain 93-119 plasmid unnamed2, complete sequence	NA	NA	NA	taxon:622	NA	NA	NA	NA	genomic DNA	Shigella dysenteriae	unnamed2	93-119	NA	NA	NA	NA	NA	NA	NA	Provisional 93-119	NA	NA	NA	NA	NA	NA	NA	NA	NA	NA	NA	NA	NA	NA	NA	NA	NA	NA
867	CP026818.1	circular	80213	Bacteria	Proteobacteria	Gammaproteobacteria	Enterobacterales	Enterobacteriaceae	Shigella	Shigella dysenteriae	Shigella dysenteriae strain 96-265 plasmid unnamed1, complete sequence	NA	NA	NA	taxon:622	NA	NA	NA	NA	genomic DNA	Shigella dysenteriae	unnamed1	96-265	NA	NA	NA	NA	NA	NA	NA	Provisional 96-265	NA	NA	NA	NA	NA	NA	NA	NA	NA	NA	NA	NA	NA	NA	NA	NA	NA	NA
868	CP026820.1	circular	195489	Bacteria	Proteobacteria	Gammaproteobacteria	Enterobacterales	Enterobacteriaceae	Shigella	Shigella dysenteriae	Shigella dysenteriae strain 96-265 plasmid unnamed2, complete sequence	NA	NA	NA	taxon:622	NA	NA	NA	NA	genomic DNA	Shigella dysenteriae	unnamed2	96-265	NA	NA	NA	NA	NA	NA	NA	Provisional 96-265	NA	NA	NA	NA	NA	NA	NA	NA	NA	NA	NA	NA	NA	NA	NA	NA	NA	NA
869	CP026821.1	circular	79586	Bacteria	Proteobacteria	Gammaproteobacteria	Enterobacterales	Enterobacteriaceae	Shigella	Shigella dysenteriae	Shigella dysenteriae strain 96-3162 plasmid unnamed1, complete sequence	NA	NA	NA	taxon:622	NA	NA	NA	NA	genomic DNA	Shigella dysenteriae	unnamed1	96-3162	NA	NA	NA	NA	NA	NA	NA	Provisional 96-3162	NA	NA	NA	NA	NA	NA	NA	NA	NA	NA	NA	NA	NA	NA	NA	NA	NA	NA
870	CP026822.1	circular	215820	Bacteria	Proteobacteria	Gammaproteobacteria	Enterobacterales	Enterobacteriaceae	Shigella	Shigella dysenteriae	Shigella dysenteriae strain 96-3162 plasmid unnamed2, complete sequence	NA	NA	NA	taxon:622	NA	NA	NA	NA	genomic DNA	Shigella dysenteriae	unnamed2	96-3162	NA	NA	NA	NA	NA	NA	NA	Provisional 96-3162	NA	NA	NA	NA	NA	NA	NA	NA	NA	NA	NA	NA	NA	NA	NA	NA	NA	NA
871	CP026829.1	circular	216328	Bacteria	Proteobacteria	Gammaproteobacteria	Enterobacterales	Enterobacteriaceae	Shigella	Shigella dysenteriae	Shigella dysenteriae strain ATCC 12037 plasmid unnamed, complete sequence	NA	NA	NA	taxon:622	NA	NA	NA	NA	genomic DNA	Shigella dysenteriae	unnamed	ATCC 12037	NA	NA	NA	NA	NA	NA	ATCC:12037	9	NA	NA	NA	NA	NA	NA	NA	NA	NA	NA	NA	NA	NA	NA	NA	NA	NA	NA
872	CP026830.1	circular	181100	Bacteria	Proteobacteria	Gammaproteobacteria	Enterobacterales	Enterobacteriaceae	Shigella	Shigella dysenteriae	Shigella dysenteriae strain ATCC 12039 plasmid unnamed, complete sequence	NA	NA	NA	taxon:622	NA	NA	NA	NA	genomic DNA	Shigella dysenteriae	unnamed	ATCC 12039	NA	NA	NA	NA	NA	NA	ATCC:12039	10	NA	NA	NA	NA	NA	NA	NA	NA	NA	NA	NA	NA	NA	NA	NA	NA	NA	NA
873	CP026833.1	circular	224419	Bacteria	Proteobacteria	Gammaproteobacteria	Enterobacterales	Enterobacteriaceae	Shigella	Shigella dysenteriae	Shigella dysenteriae strain ATCC 49346 plasmid unnamed, complete sequence	NA	NA	NA	taxon:622	NA	Homo sapiens	Feces of patient with diarrhea	NA	genomic DNA	Shigella dysenteriae	unnamed	ATCC 49346	NA	NA	NA	NA	NA	NA	ATCC:49346	NA	NA	NA	NA	NA	NA	NA	NA	NA	NA	NA	NA	NA	NA	NA	NA	NA	NA	NA
874	CP026835.1	circular	99066	Bacteria	Proteobacteria	Gammaproteobacteria	Enterobacterales	Enterobacteriaceae	Shigella	Shigella dysenteriae	Shigella dysenteriae strain ATCC 49347 plasmid unnamed, complete sequence	NA	NA	NA	taxon:622	NA	Homo sapiens	Feces of patient with diarrhea	NA	genomic DNA	Shigella dysenteriae	unnamed	ATCC 49347	NA	NA	NA	NA	NA	NA	ATCC:49347	NA	NA	NA	NA	NA	NA	NA	NA	NA	NA	NA	NA	NA	NA	NA	NA	NA	NA	NA
875	CP026837.1	circular	213410	Bacteria	Proteobacteria	Gammaproteobacteria	Enterobacterales	Enterobacteriaceae	Shigella	Shigella boydii	Shigella boydii strain ATCC 49812 plasmid unnamed, complete sequence	NA	NA	NA	taxon:621	NA	NA	NA	NA	genomic DNA	Shigella boydii	unnamed	ATCC 49812	NA	NA	NA	NA	NA	NA	ATCC:49812	9	NA	NA	NA	NA	NA	NA	NA	NA	NA	NA	NA	NA	NA	NA	NA	NA	NA	NA
876	CP026838.1	circular	103367	Bacteria	Proteobacteria	Gammaproteobacteria	Enterobacterales	Enterobacteriaceae	Shigella	Shigella dysenteriae	Shigella dysenteriae strain ATCC 9752 plasmid unnamed, complete sequence	NA	NA	NA	taxon:622	NA	NA	NA	NA	genomic DNA	Shigella dysenteriae	unnamed	ATCC 9752	NA	NA	NA	NA	NA	NA	ATCC:9752	7	NA	NA	NA	NA	NA	NA	NA	NA	NA	NA	NA	NA	NA	NA	NA	NA	NA	NA
877	CP026841.1	circular	215925	Bacteria	Proteobacteria	Gammaproteobacteria	Enterobacterales	Enterobacteriaceae	Shigella	Shigella dysenteriae	Shigella dysenteriae strain ATCC 9753 plasmid unnamed, complete sequence	NA	NA	NA	taxon:622	NA	NA	NA	NA	genomic DNA	Shigella dysenteriae	unnamed	ATCC 9753	NA	NA	NA	NA	NA	NA	ATCC:9753	4	NA	NA	NA	NA	NA	NA	NA	NA	NA	NA	NA	NA	NA	NA	NA	NA	NA	NA
878	CP026843.1	circular	106437	Bacteria	Proteobacteria	Gammaproteobacteria	Enterobacterales	Enterobacteriaceae	Shigella	Shigella dysenteriae	Shigella dysenteriae strain ATCC 9754 plasmid unnamed, complete sequence	NA	NA	NA	taxon:622	NA	NA	NA	NA	genomic DNA	Shigella dysenteriae	unnamed	ATCC 9754	NA	NA	NA	NA	NA	NA	ATCC:9754	6	NA	NA	NA	NA	NA	NA	NA	NA	NA	NA	NA	NA	NA	NA	NA	NA	NA	NA
879	CP026844.1	circular	230094	Bacteria	Proteobacteria	Gammaproteobacteria	Enterobacterales	Enterobacteriaceae	Shigella	Shigella boydii	Shigella boydii strain NCTC 9733 plasmid unnamed, complete sequence	NA	NA	NA	taxon:621	NA	NA	NA	NA	genomic DNA	Shigella boydii	unnamed	NCTC 9733	NA	NA	NA	NA	NA	NA	NCTC:9733	5	NA	NA	NA	NA	NA	NA	NA	NA	NA	NA	NA	NA	NA	NA	NA	NA	NA	NA
880	CP026876.1	circular	166502	Bacteria	Proteobacteria	Gammaproteobacteria	Enterobacterales	Enterobacteriaceae	Shigella	Shigella boydii	Shigella boydii strain ATCC 35964 plasmid unnamed, complete sequence	NA	NA	NA	taxon:621	NA	Homo sapiens	Feces of patient with dysentery	NA	genomic DNA	Shigella boydii	unnamed	ATCC 35964	NA	NA	NA	NA	isolated in Indochina	NA	ATCC:35964	NA	NA	NA	NA	NA	NA	NA	NA	NA	NA	NA	NA	NA	NA	NA	NA	NA	NA	NA
881	CP026879.1	circular	69799	Bacteria	Proteobacteria	Gammaproteobacteria	Enterobacterales	Enterobacteriaceae	Shigella	Shigella dysenteriae	Shigella dysenteriae strain 07-3308 plasmid unnamed, complete sequence	NA	NA	NA	taxon:622	NA	NA	NA	NA	genomic DNA	Shigella dysenteriae	unnamed	3308-07-01	NA	NA	NA	NA	NA	NA	NA	1	NA	NA	NA	NA	NA	NA	NA	NA	NA	NA	NA	NA	NA	NA	NA	NA	NA	NA
882	CP027121.1	circular	72105	Bacteria	Proteobacteria	Gammaproteobacteria	Pseudomonadales	Moraxellaceae	Acinetobacter	Acinetobacter baumannii	Acinetobacter baumannii strain AR_0056 plasmid unnamed2, complete sequence	NA	NA	NA	taxon:470	NA	NA	NA	NA	genomic DNA	Acinetobacter baumannii	unnamed2	AR_0056	NA	NA	NA	NA	NA	NA	NA	NA	NA	NA	NA	NA	NA	NA	NA	NA	NA	NA	NA	NA	NA	NA	NA	NA	NA	NA
883	CP027122.1	circular	113706	Bacteria	Proteobacteria	Gammaproteobacteria	Pseudomonadales	Moraxellaceae	Acinetobacter	Acinetobacter baumannii	Acinetobacter baumannii strain AR_0056 plasmid unnamed1, complete sequence	NA	NA	NA	taxon:470	NA	NA	NA	NA	genomic DNA	Acinetobacter baumannii	unnamed1	AR_0056	NA	NA	NA	NA	NA	NA	NA	NA	NA	NA	NA	NA	NA	NA	NA	NA	NA	NA	NA	NA	NA	NA	NA	NA	NA	NA
884	CP027124.1	circular	8731	Bacteria	Proteobacteria	Gammaproteobacteria	Pseudomonadales	Moraxellaceae	Acinetobacter	Acinetobacter baumannii	Acinetobacter baumannii strain AR_0056 plasmid unnamed3, complete sequence	NA	NA	NA	taxon:470	NA	NA	NA	NA	genomic DNA	Acinetobacter baumannii	unnamed3	AR_0056	NA	NA	NA	NA	NA	NA	NA	NA	NA	NA	NA	NA	NA	NA	NA	NA	NA	NA	NA	NA	NA	NA	NA	NA	NA	NA
885	CP027128.1	circular	1565	Bacteria	Proteobacteria	Gammaproteobacteria	Enterobacterales	Enterobacteriaceae	Escherichia	Escherichia coli	Escherichia coli strain AR_0374 plasmid unnamed1, complete sequence	NA	NA	NA	taxon:562	NA	NA	NA	NA	genomic DNA	Escherichia coli	unnamed1	AR_0374	NA	NA	NA	NA	NA	NA	NA	NA	NA	NA	NA	NA	NA	NA	NA	NA	NA	NA	NA	NA	NA	NA	NA	NA	NA	NA
886	CP027130.1	circular	170292	Bacteria	Proteobacteria	Gammaproteobacteria	Enterobacterales	Enterobacteriaceae	Escherichia	Escherichia coli	Escherichia coli strain AR_0372 plasmid unnamed1, complete sequence	NA	NA	NA	taxon:562	NA	NA	NA	NA	genomic DNA	Escherichia coli	unnamed1	AR_0372	NA	NA	NA	NA	NA	NA	NA	NA	NA	NA	NA	NA	NA	NA	NA	NA	NA	NA	NA	NA	NA	NA	NA	NA	NA	NA
887	CP027131.1	circular	1552	Bacteria	Proteobacteria	Gammaproteobacteria	Enterobacterales	Enterobacteriaceae	Escherichia	Escherichia coli	Escherichia coli strain AR_0372 plasmid unnamed3, complete sequence	NA	NA	NA	taxon:562	NA	NA	NA	NA	genomic DNA	Escherichia coli	unnamed3	AR_0372	NA	NA	NA	NA	NA	NA	NA	NA	NA	NA	NA	NA	NA	NA	NA	NA	NA	NA	NA	NA	NA	NA	NA	NA	NA	NA
888	CP027132.1	circular	2101	Bacteria	Proteobacteria	Gammaproteobacteria	Enterobacterales	Enterobacteriaceae	Escherichia	Escherichia coli	Escherichia coli strain AR_0372 plasmid unnamed2, complete sequence	NA	NA	NA	taxon:562	NA	NA	NA	NA	genomic DNA	Escherichia coli	unnamed2	AR_0372	NA	NA	NA	NA	NA	NA	NA	NA	NA	NA	NA	NA	NA	NA	NA	NA	NA	NA	NA	NA	NA	NA	NA	NA	NA	NA
889	CP027137.1	circular	49534	Bacteria	Proteobacteria	Gammaproteobacteria	Enterobacterales	Enterobacteriaceae	Escherichia	Escherichia coli	Escherichia coli strain AR_0369 plasmid unnamed1, complete sequence	NA	NA	NA	taxon:562	NA	NA	NA	NA	genomic DNA	Escherichia coli	unnamed1	AR_0369	NA	NA	NA	NA	NA	NA	NA	NA	NA	NA	NA	NA	NA	NA	NA	NA	NA	NA	NA	NA	NA	NA	NA	NA	NA	NA
890	CP027144.1	circular	328871	Bacteria	Proteobacteria	Gammaproteobacteria	Enterobacterales	Enterobacteriaceae	Enterobacter	"Enterobacter cloacae complexHoffmann cluster III"	Enterobacter cloacae complex 'Hoffmann cluster III' strain AR_0365 plasmid unnamed1, complete sequence	NA	NA	NA	taxon:1812934	NA	NA	NA	NA	genomic DNA	Enterobacter cloacae complex Hoffmann cluster III	unnamed1	AR_0365	NA	NA	NA	NA	NA	NA	NA	NA	NA	NA	NA	NA	NA	NA	NA	NA	NA	NA	NA	NA	NA	NA	NA	NA	NA	NA
891	CP027145.1	circular	101548	Bacteria	Proteobacteria	Gammaproteobacteria	Enterobacterales	Enterobacteriaceae	Enterobacter	"Enterobacter cloacae complexHoffmann cluster III"	Enterobacter cloacae complex 'Hoffmann cluster III' strain AR_0365 plasmid unnamed2, complete sequence	NA	NA	NA	taxon:1812934	NA	NA	NA	NA	genomic DNA	Enterobacter cloacae complex Hoffmann cluster III	unnamed2	AR_0365	NA	NA	NA	NA	NA	NA	NA	NA	NA	NA	NA	NA	NA	NA	NA	NA	NA	NA	NA	NA	NA	NA	NA	NA	NA	NA
892	CP027152.1	circular	208849	Bacteria	Proteobacteria	Gammaproteobacteria	Enterobacterales	Enterobacteriaceae	Klebsiella	Klebsiella pneumoniae	Klebsiella pneumoniae strain AR_0363 plasmid unnamed1, complete sequence	NA	NA	NA	taxon:573	NA	NA	NA	NA	genomic DNA	Klebsiella pneumoniae	unnamed1	AR_0363	NA	NA	NA	NA	NA	NA	NA	NA	NA	NA	NA	NA	NA	NA	NA	NA	NA	NA	NA	NA	NA	NA	NA	NA	NA	NA
893	CP027158.1	circular	113639	Bacteria	Proteobacteria	Gammaproteobacteria	Enterobacterales	Enterobacteriaceae	Klebsiella	Klebsiella pneumoniae	Klebsiella pneumoniae strain AR_0361 plasmid unnamed2, complete sequence	NA	NA	NA	taxon:573	NA	NA	NA	NA	genomic DNA	Klebsiella pneumoniae	unnamed2	AR_0361	NA	NA	NA	NA	NA	NA	NA	NA	NA	NA	NA	NA	NA	NA	NA	NA	NA	NA	NA	NA	NA	NA	NA	NA	NA	NA
894	CP027161.1	circular	207543	Bacteria	Proteobacteria	Gammaproteobacteria	Enterobacterales	Enterobacteriaceae	Klebsiella	Klebsiella pneumoniae	Klebsiella pneumoniae strain AR_0361 plasmid unnamed1, complete sequence	NA	NA	NA	taxon:573	NA	NA	NA	NA	genomic DNA	Klebsiella pneumoniae	unnamed1	AR_0361	NA	NA	NA	NA	NA	NA	NA	NA	NA	NA	NA	NA	NA	NA	NA	NA	NA	NA	NA	NA	NA	NA	NA	NA	NA	NA
895	CP027167.1	circular	165365	Bacteria	Proteobacteria	Gammaproteobacteria	Pseudomonadales	Pseudomonadaceae	Pseudomonas	Pseudomonas aeruginosa	Pseudomonas aeruginosa strain AR_0356 plasmid unnamed3, complete sequence	NA	NA	NA	taxon:287	NA	NA	NA	NA	genomic DNA	Pseudomonas aeruginosa	unnamed3	AR_0356	NA	NA	NA	NA	NA	NA	NA	NA	NA	NA	NA	NA	NA	NA	NA	NA	NA	NA	NA	NA	NA	NA	NA	NA	NA	NA
896	CP027168.1	circular	57053	Bacteria	Proteobacteria	Gammaproteobacteria	Pseudomonadales	Pseudomonadaceae	Pseudomonas	Pseudomonas aeruginosa	Pseudomonas aeruginosa strain AR_0356 plasmid unnamed1, complete sequence	NA	NA	NA	taxon:287	NA	NA	NA	NA	genomic DNA	Pseudomonas aeruginosa	unnamed1	AR_0356	NA	NA	NA	NA	NA	NA	NA	NA	NA	NA	NA	NA	NA	NA	NA	NA	NA	NA	NA	NA	NA	NA	NA	NA	NA	NA
897	CP027170.1	circular	438531	Bacteria	Proteobacteria	Gammaproteobacteria	Pseudomonadales	Pseudomonadaceae	Pseudomonas	Pseudomonas aeruginosa	Pseudomonas aeruginosa strain AR_0356 plasmid unnamed2, complete sequence	NA	NA	NA	taxon:287	NA	NA	NA	NA	genomic DNA	Pseudomonas aeruginosa	unnamed2	AR_0356	NA	NA	NA	NA	NA	NA	NA	NA	NA	NA	NA	NA	NA	NA	NA	NA	NA	NA	NA	NA	NA	NA	NA	NA	NA	NA
898	CP027173.1	circular	41559	Bacteria	Proteobacteria	Gammaproteobacteria	Pseudomonadales	Pseudomonadaceae	Pseudomonas	Pseudomonas aeruginosa	Pseudomonas aeruginosa strain AR_0353 plasmid unnamed1, complete sequence	NA	NA	NA	taxon:287	NA	NA	NA	NA	genomic DNA	Pseudomonas aeruginosa	unnamed1	AR_0353	NA	NA	NA	NA	NA	NA	NA	NA	NA	NA	NA	NA	NA	NA	NA	NA	NA	NA	NA	NA	NA	NA	NA	NA	NA	NA
899	CP027179.1	circular	39535	Bacteria	Proteobacteria	Gammaproteobacteria	Pseudomonadales	Moraxellaceae	Acinetobacter	Acinetobacter baumannii	Acinetobacter baumannii strain AR_0070 plasmid unnamed1, complete sequence	NA	NA	NA	taxon:470	NA	NA	NA	NA	genomic DNA	Acinetobacter baumannii	unnamed1	AR_0070	NA	NA	NA	NA	NA	NA	NA	NA	NA	NA	NA	NA	NA	NA	NA	NA	NA	NA	NA	NA	NA	NA	NA	NA	NA	NA
900	CP027180.1	circular	73018	Bacteria	Proteobacteria	Gammaproteobacteria	Pseudomonadales	Moraxellaceae	Acinetobacter	Acinetobacter baumannii	Acinetobacter baumannii strain AR_0070 plasmid unnamed2, complete sequence	NA	NA	NA	taxon:470	NA	NA	NA	NA	genomic DNA	Acinetobacter baumannii	unnamed2	AR_0070	NA	NA	NA	NA	NA	NA	NA	NA	NA	NA	NA	NA	NA	NA	NA	NA	NA	NA	NA	NA	NA	NA	NA	NA	NA	NA
901	CP027181.1	circular	6078	Bacteria	Proteobacteria	Gammaproteobacteria	Pseudomonadales	Moraxellaceae	Acinetobacter	Acinetobacter baumannii	Acinetobacter baumannii strain AR_0070 plasmid unnamed3, complete sequence	NA	NA	NA	taxon:470	NA	NA	NA	NA	genomic DNA	Acinetobacter baumannii	unnamed3	AR_0070	NA	NA	NA	NA	NA	NA	NA	NA	NA	NA	NA	NA	NA	NA	NA	NA	NA	NA	NA	NA	NA	NA	NA	NA	NA	NA
902	CP027182.1	circular	105127	Bacteria	Proteobacteria	Gammaproteobacteria	Pseudomonadales	Moraxellaceae	Acinetobacter	Acinetobacter baumannii	Acinetobacter baumannii strain AR_0070 plasmid unnamed4, complete sequence	NA	NA	NA	taxon:470	NA	NA	NA	NA	genomic DNA	Acinetobacter baumannii	unnamed4	AR_0070	NA	NA	NA	NA	NA	NA	NA	NA	NA	NA	NA	NA	NA	NA	NA	NA	NA	NA	NA	NA	NA	NA	NA	NA	NA	NA
903	CP027184.1	circular	60699	Bacteria	Proteobacteria	Gammaproteobacteria	Pseudomonadales	Moraxellaceae	Acinetobacter	Acinetobacter baumannii	Acinetobacter baumannii strain AR_0052 plasmid unnamed2, complete sequence	NA	NA	NA	taxon:470	NA	NA	NA	NA	genomic DNA	Acinetobacter baumannii	unnamed2	AR_0052	NA	NA	NA	NA	NA	NA	NA	NA	NA	NA	NA	NA	NA	NA	NA	NA	NA	NA	NA	NA	NA	NA	NA	NA	NA	NA
904	CP027185.1	circular	105128	Bacteria	Proteobacteria	Gammaproteobacteria	Pseudomonadales	Moraxellaceae	Acinetobacter	Acinetobacter baumannii	Acinetobacter baumannii strain AR_0052 plasmid unnamed1, complete sequence	NA	NA	NA	taxon:470	NA	NA	NA	NA	genomic DNA	Acinetobacter baumannii	unnamed1	AR_0052	NA	NA	NA	NA	NA	NA	NA	NA	NA	NA	NA	NA	NA	NA	NA	NA	NA	NA	NA	NA	NA	NA	NA	NA	NA	NA
905	CP027187.1	circular	6078	Bacteria	Proteobacteria	Gammaproteobacteria	Pseudomonadales	Moraxellaceae	Acinetobacter	Acinetobacter baumannii	Acinetobacter baumannii strain AR_0052 plasmid unnamed3, complete sequence	NA	NA	NA	taxon:470	NA	NA	NA	NA	genomic DNA	Acinetobacter baumannii	unnamed3	AR_0052	NA	NA	NA	NA	NA	NA	NA	NA	NA	NA	NA	NA	NA	NA	NA	NA	NA	NA	NA	NA	NA	NA	NA	NA	NA	NA
906	CP027364.1	circular	74659	Bacteria	Proteobacteria	Gammaproteobacteria	Enterobacterales	Enterobacteriaceae	Escherichia	Escherichia coli	Escherichia coli strain 88-3001 plasmid unnamed, complete sequence	NA	NA	NA	taxon:562	NA	NA	NA	NA	genomic DNA	Escherichia coli	unnamed	88-3001	NA	NA	NA	NA	NA	NA	NA	O165:H25	NA	NA	NA	NA	NA	NA	NA	NA	NA	NA	NA	NA	NA	NA	NA	NA	NA	NA
907	CP027377.1	circular	70152	Bacteria	Proteobacteria	Gammaproteobacteria	Enterobacterales	Enterobacteriaceae	Escherichia	Escherichia coli	Escherichia coli strain 2013C-4404 plasmid unnamed1, complete sequence	NA	Aug-2013	NA	taxon:562	NA	Homo sapiens	stool	NA	genomic DNA	Escherichia coli	unnamed1	2013C-4404	NA	NA	NA	NA	NA	NA	NA	O91:H14	NA	NA	NA	NA	NA	NA	NA	NA	NA	NA	NA	NA	NA	NA	NA	NA	NA	NA
908	CP027379.1	circular	104889	Bacteria	Proteobacteria	Gammaproteobacteria	Enterobacterales	Enterobacteriaceae	Escherichia	Escherichia coli	Escherichia coli strain 2013C-4404 plasmid unnamed3, complete sequence	NA	Aug-2013	NA	taxon:562	NA	Homo sapiens	stool	NA	genomic DNA	Escherichia coli	unnamed3	2013C-4404	NA	NA	NA	NA	NA	NA	NA	O91:H14	NA	NA	NA	NA	NA	NA	NA	NA	NA	NA	NA	NA	NA	NA	NA	NA	NA	NA
909	CP027485.1	circular	147394	Bacteria	Proteobacteria	Gammaproteobacteria	Enterobacterales	Enterobacteriaceae	Escherichia	Escherichia coli	Escherichia coli strain 2013C-4390 plasmid unnamed, complete sequence	NA	Aug-2013	NA	taxon:562	NA	Homo sapiens	stool	NA	genomic DNA	Escherichia coli	unnamed	2013C-4390	NA	NA	NA	NA	NA	NA	NA	O76:H19	NA	NA	NA	NA	NA	NA	NA	NA	NA	NA	NA	NA	NA	NA	NA	NA	NA	NA
910	CP027641.1	circular	126957	Bacteria	Proteobacteria	Gammaproteobacteria	Enterobacterales	Enterobacteriaceae	Escherichia	Escherichia coli	Escherichia coli strain 2014C-4705 plasmid unnamed, complete sequence	NA	2014-11-01	NA	taxon:562	NA	Homo sapiens	stool	NA	genomic DNA	Escherichia coli	unnamed	2014C-4705	NA	NA	NA	NA	NA	NA	NA	O112:H21	NA	NA	NA	NA	NA	NA	NA	NA	NA	NA	NA	NA	NA	NA	NA	NA	NA	NA
911	CP027674.1	circular	133420	Bacteria	Proteobacteria	Gammaproteobacteria	Enterobacterales	Enterobacteriaceae	Escherichia	Escherichia coli	Escherichia coli strain 2014C-3003 plasmid unnamed2, complete sequence	NA	Dec-2013	NA	taxon:562	NA	Homo sapiens	stool	NA	genomic DNA	Escherichia coli	unnamed2	2014C-3003	NA	NA	NA	NA	NA	NA	NA	O76:H19	NA	NA	NA	NA	NA	NA	NA	NA	NA	NA	NA	NA	NA	NA	NA	NA	NA	NA
912	CP027765.1	circular	66388	Bacteria	Proteobacteria	Gammaproteobacteria	Enterobacterales	Enterobacteriaceae	Escherichia	Escherichia coli	Escherichia coli strain 2015C-3125 plasmid unnamed2, complete sequence	NA	2014-09-01	NA	taxon:562	NA	Homo sapiens	stool	NA	genomic DNA	Escherichia coli	unnamed2	2015C-3125	NA	NA	NA	NA	NA	NA	NA	O145:H28	NA	NA	NA	NA	NA	NA	NA	NA	NA	NA	NA	NA	NA	NA	NA	NA	NA	NA
913	CP028380.1	circular	89518	Bacteria	Proteobacteria	Gammaproteobacteria	Enterobacterales	Enterobacteriaceae	Escherichia	Escherichia coli	Escherichia coli strain RM9872 plasmid pRM9872-1, complete sequence	USDA ARS PSM	2009-07-01	USA: Salinas, California	taxon:562	NA	Bos taurus	feces	36.68 N 121.67 W	genomic DNA	Escherichia coli	pRM9872-1	RM9872	NA	NA	NA	NA	NA	NA	NA	O145	NA	NA	NA	NA	NA	NA	NA	NA	NA	NA	NA	NA	NA	NA	NA	NA	NA	NA
914	CP028556.1	circular	7547	Bacteria	Proteobacteria	Gammaproteobacteria	Pseudomonadales	Moraxellaceae	Acinetobacter	Acinetobacter sp. WCHA45	Acinetobacter sp. WCHA45 plasmid p1_010045, complete sequence	NA	2015-10-31	China: Sichuan, Chengdu	taxon:2004644	NA	NA	Sewage	NA	genomic DNA	Acinetobacter sp. WCHA45	p1_010045	WCHA45	NA	NA	NA	NA	NA	NA	NA	NA	NA	NA	NA	NA	NA	NA	NA	NA	NA	NA	NA	NA	NA	NA	NA	NA	NA	NA
915	CP028557.1	circular	7282	Bacteria	Proteobacteria	Gammaproteobacteria	Pseudomonadales	Moraxellaceae	Acinetobacter	Acinetobacter sp. WCHA45	Acinetobacter sp. WCHA45 plasmid p2_010045, complete sequence	NA	2015-10-31	China: Sichuan, Chengdu	taxon:2004644	NA	NA	Sewage	NA	genomic DNA	Acinetobacter sp. WCHA45	p2_010045	WCHA45	NA	NA	NA	NA	NA	NA	NA	NA	NA	NA	NA	NA	NA	NA	NA	NA	NA	NA	NA	NA	NA	NA	NA	NA	NA	NA
916	CP028558.1	circular	6132	Bacteria	Proteobacteria	Gammaproteobacteria	Pseudomonadales	Moraxellaceae	Acinetobacter	Acinetobacter sp. WCHA45	Acinetobacter sp. WCHA45 plasmid p3_010045, complete sequence	NA	2015-10-31	China: Sichuan, Chengdu	taxon:2004644	NA	NA	Sewage	NA	genomic DNA	Acinetobacter sp. WCHA45	p3_010045	WCHA45	NA	NA	NA	NA	NA	NA	NA	NA	NA	NA	NA	NA	NA	NA	NA	NA	NA	NA	NA	NA	NA	NA	NA	NA	NA	NA
917	CP028559.1	circular	4344	Bacteria	Proteobacteria	Gammaproteobacteria	Pseudomonadales	Moraxellaceae	Acinetobacter	Acinetobacter sp. WCHA45	Acinetobacter sp. WCHA45 plasmid p4_010045, complete sequence	NA	2015-10-31	China: Sichuan, Chengdu	taxon:2004644	NA	NA	Sewage	NA	genomic DNA	Acinetobacter sp. WCHA45	p4_010045	WCHA45	NA	NA	NA	NA	NA	NA	NA	NA	NA	NA	NA	NA	NA	NA	NA	NA	NA	NA	NA	NA	NA	NA	NA	NA	NA	NA
918	CP028560.1	circular	190170	Bacteria	Proteobacteria	Gammaproteobacteria	Pseudomonadales	Moraxellaceae	Acinetobacter	Acinetobacter sp. WCHA45	Acinetobacter sp. WCHA45 plasmid pNDM1_010045, complete sequence	NA	2015-10-31	China: Sichuan, Chengdu	taxon:2004644	NA	NA	Sewage	NA	genomic DNA	Acinetobacter sp. WCHA45	pNDM1_010045	WCHA45	NA	NA	NA	NA	NA	NA	NA	NA	NA	NA	NA	NA	NA	NA	NA	NA	NA	NA	NA	NA	NA	NA	NA	NA	NA	NA
919	CP028705.1	circular	46161	Bacteria	Proteobacteria	Gammaproteobacteria	Enterobacterales	Enterobacteriaceae	Escherichia	Escherichia coli	Escherichia coli strain VH1 plasmid pVH1, complete sequence	Bao-Tao Liu	25-May-2017	China:Qingdao	taxon:562	NA	NA	cucumber	37.09 N 121.00 E	genomic DNA	Escherichia coli	pVH1	VH1	NA	NA	NA	NA	NA	NA	NA	NA	NA	NA	NA	NA	NA	NA	NA	NA	NA	NA	NA	NA	NA	NA	NA	NA	NA	NA
920	CP028916.1	circular	148366	Bacteria	Proteobacteria	Gammaproteobacteria	Enterobacterales	Enterobacteriaceae	Klebsiella	Klebsiella pneumoniae	Klebsiella pneumoniae strain NCTC 418 plasmid unnamed1, complete sequence	NA	NA	NA	taxon:573	NA	NA	NA	NA	genomic DNA	Klebsiella pneumoniae	unnamed1	NCTC 418	NA	NA	NA	NA	NA	NA	NCTC:418	NA	NA	NA	NA	NA	NA	NA	NA	NA	NA	NA	NA	NA	NA	NA	NA	NA	NA	NA
921	CP029162.1	circular	7683	Bacteria	Proteobacteria	Gammaproteobacteria	Enterobacterales	Erwiniaceae	Buchnera	Buchnera aphidicola	Buchnera aphidicola (Melanaphis sacchari) strain LSU plasmid unnamed1, complete sequence	NA	2017-01-01	USA: Lincoln, NE	taxon:2173854	NA	Melanaphis sacchari	adult insect on Sorghum bicolor	NA	genomic DNA	Buchnera aphidicola (Melanaphis sacchari)	unnamed1	LSU	NA	NA	NA	NA	NA	NA	NA	NA	NA	NA	NA	NA	NA	NA	NA	NA	NA	NA	NA	NA	NA	NA	NA	NA	NA	NA
922	CP029163.1	circular	3666	Bacteria	Proteobacteria	Gammaproteobacteria	Enterobacterales	Erwiniaceae	Buchnera	Buchnera aphidicola	Buchnera aphidicola (Melanaphis sacchari) strain LSU plasmid unnamed2, complete sequence	NA	2017-01-01	USA: Lincoln, NE	taxon:2173854	NA	Melanaphis sacchari	adult insect on Sorghum bicolor	NA	genomic DNA	Buchnera aphidicola (Melanaphis sacchari)	unnamed2	LSU	NA	NA	NA	NA	NA	NA	NA	NA	NA	NA	NA	NA	NA	NA	NA	NA	NA	NA	NA	NA	NA	NA	NA	NA	NA	NA
923	CP029444.1	circular	3223	Bacteria	Proteobacteria	Gammaproteobacteria	Enterobacterales	Yersiniaceae	Serratia	Serratia marcescens	Serratia marcescens strain CAV1761 plasmid pCAV1761-3223, complete sequence	Clinical Microbiology University of Virginia Health System	2014-03-01	USA:Virginia	taxon:615	NA	Homo sapiens	Peri-rectal	38.14 N 78.45 W	genomic DNA	Serratia marcescens	pCAV1761-3223	CAV1761	NA	NA	NA	NA	NA	NA	NA	NA	NA	NA	NA	NA	NA	NA	NA	NA	NA	NA	NA	NA	NA	NA	NA	NA	NA	NA
924	CP029445.1	circular	6393	Bacteria	Proteobacteria	Gammaproteobacteria	Enterobacterales	Yersiniaceae	Serratia	Serratia marcescens	Serratia marcescens strain CAV1761 plasmid pCAV1761-6393, complete sequence	Clinical Microbiology University of Virginia Health System	2014-03-01	USA:Virginia	taxon:615	NA	Homo sapiens	Peri-rectal	38.14 N 78.45 W	genomic DNA	Serratia marcescens	pCAV1761-6393	CAV1761	NA	NA	NA	NA	NA	NA	NA	NA	NA	NA	NA	NA	NA	NA	NA	NA	NA	NA	NA	NA	NA	NA	NA	NA	NA	NA
925	CP029446.1	circular	69158	Bacteria	Proteobacteria	Gammaproteobacteria	Enterobacterales	Yersiniaceae	Serratia	Serratia marcescens	Serratia marcescens strain CAV1761 plasmid pKPC_CAV1761, complete sequence	Clinical Microbiology University of Virginia Health System	2014-03-01	USA:Virginia	taxon:615	NA	Homo sapiens	Peri-rectal	38.14 N 78.45 W	genomic DNA	Serratia marcescens	pKPC_CAV1761	CAV1761	NA	NA	NA	NA	NA	NA	NA	NA	NA	NA	NA	NA	NA	NA	NA	NA	NA	NA	NA	NA	NA	NA	NA	NA	NA	NA
926	CP029447.1	circular	73100	Bacteria	Proteobacteria	Gammaproteobacteria	Enterobacterales	Yersiniaceae	Serratia	Serratia marcescens	Serratia marcescens strain CAV1761 plasmid pCAV1761-73, complete sequence	Clinical Microbiology University of Virginia Health System	2014-03-01	USA:Virginia	taxon:615	NA	Homo sapiens	Peri-rectal	38.14 N 78.45 W	genomic DNA	Serratia marcescens	pCAV1761-73	CAV1761	NA	NA	NA	NA	NA	NA	NA	NA	NA	NA	NA	NA	NA	NA	NA	NA	NA	NA	NA	NA	NA	NA	NA	NA	NA	NA
927	CP029448.1	circular	204825	Bacteria	Proteobacteria	Gammaproteobacteria	Enterobacterales	Yersiniaceae	Serratia	Serratia marcescens	Serratia marcescens strain CAV1761 plasmid pCAV1761-205, complete sequence	Clinical Microbiology University of Virginia Health System	2014-03-01	USA:Virginia	taxon:615	NA	Homo sapiens	Peri-rectal	38.14 N 78.45 W	genomic DNA	Serratia marcescens	pCAV1761-205	CAV1761	NA	NA	NA	NA	NA	NA	NA	NA	NA	NA	NA	NA	NA	NA	NA	NA	NA	NA	NA	NA	NA	NA	NA	NA	NA	NA
928	CP029656.1	circular	27245	Bacteria	Firmicutes	Bacilli	Bacillales	Staphylococcaceae	Staphylococcus	Staphylococcus aureus	Staphylococcus aureus strain AR_0468 plasmid unnamed1, complete sequence	NA	NA	NA	taxon:1280	NA	NA	NA	NA	genomic DNA	Staphylococcus aureus	unnamed1	AR_0468	NA	NA	NA	NA	NA	NA	NA	NA	NA	NA	NA	NA	NA	NA	NA	NA	NA	NA	NA	NA	NA	NA	NA	NA	NA	NA
929	CP029661.1	circular	28166	Bacteria	Firmicutes	Bacilli	Bacillales	Staphylococcaceae	Staphylococcus	Staphylococcus aureus	Staphylococcus aureus strain AR_0228 plasmid unnamed1, complete sequence	NA	NA	NA	taxon:1280	NA	NA	NA	NA	genomic DNA	Staphylococcus aureus	unnamed1	AR_0228	NA	NA	NA	NA	NA	NA	NA	NA	NA	NA	NA	NA	NA	NA	NA	NA	NA	NA	NA	NA	NA	NA	NA	NA	NA	NA
930	CP029662.1	circular	27238	Bacteria	Firmicutes	Bacilli	Bacillales	Staphylococcaceae	Staphylococcus	Staphylococcus aureus	Staphylococcus aureus strain AR_0228 plasmid unnamed2, complete sequence	NA	NA	NA	taxon:1280	NA	NA	NA	NA	genomic DNA	Staphylococcus aureus	unnamed2	AR_0228	NA	NA	NA	NA	NA	NA	NA	NA	NA	NA	NA	NA	NA	NA	NA	NA	NA	NA	NA	NA	NA	NA	NA	NA	NA	NA
931	CP029665.1	circular	26984	Bacteria	Firmicutes	Bacilli	Bacillales	Staphylococcaceae	Staphylococcus	Staphylococcus aureus	Staphylococcus aureus strain AR_0226 plasmid unnamed1, complete sequence	NA	NA	NA	taxon:1280	NA	NA	NA	NA	genomic DNA	Staphylococcus aureus	unnamed1	AR_0226	NA	NA	NA	NA	NA	NA	NA	NA	NA	NA	NA	NA	NA	NA	NA	NA	NA	NA	NA	NA	NA	NA	NA	NA	NA	NA
932	CP029670.1	circular	27276	Bacteria	Firmicutes	Bacilli	Bacillales	Staphylococcaceae	Staphylococcus	Staphylococcus aureus	Staphylococcus aureus strain AR_0222 plasmid unnamed1, complete sequence	NA	NA	NA	taxon:1280	NA	NA	NA	NA	genomic DNA	Staphylococcus aureus	unnamed1	AR_0222	NA	NA	NA	NA	NA	NA	NA	NA	NA	NA	NA	NA	NA	NA	NA	NA	NA	NA	NA	NA	NA	NA	NA	NA	NA	NA
933	CP029672.1	circular	27269	Bacteria	Firmicutes	Bacilli	Bacillales	Staphylococcaceae	Staphylococcus	Staphylococcus aureus	Staphylococcus aureus strain AR_0220 plasmid unnamed1, complete sequence	NA	NA	NA	taxon:1280	NA	NA	NA	NA	genomic DNA	Staphylococcus aureus	unnamed1	AR_0220	NA	NA	NA	NA	NA	NA	NA	NA	NA	NA	NA	NA	NA	NA	NA	NA	NA	NA	NA	NA	NA	NA	NA	NA	NA	NA
934	CP029690.1	circular	188342	Bacteria	Proteobacteria	Gammaproteobacteria	Enterobacterales	Enterobacteriaceae	Escherichia	Escherichia coli	Escherichia coli strain SD134209 plasmid pSD134209-1, complete sequence	South Dakota Department of Health	2001	USA: South Dakota	taxon:562	NA	Homo sapiens	feces	44.57 N 100.87 W	genomic DNA	Escherichia coli	pSD134209-1	SD134209	NA	NA	NA	NA	NA	NA	NA	NA	NA	NA	NA	NA	NA	NA	NA	NA	NA	NA	NA	NA	NA	NA	NA	NA	NA	NA
935	CP029691.1	circular	78329	Bacteria	Proteobacteria	Gammaproteobacteria	Enterobacterales	Enterobacteriaceae	Escherichia	Escherichia coli	Escherichia coli strain SD134209 plasmid pSD134209-2, complete sequence	South Dakota Department of Health	2001	USA: South Dakota	taxon:562	NA	Homo sapiens	feces	44.57 N 100.87 W	genomic DNA	Escherichia coli	pSD134209-2	SD134209	NA	NA	NA	NA	NA	NA	NA	NA	NA	NA	NA	NA	NA	NA	NA	NA	NA	NA	NA	NA	NA	NA	NA	NA	NA	NA
936	CP029717.1	circular	315949	Bacteria	Proteobacteria	Gammaproteobacteria	Enterobacterales	Enterobacteriaceae	Enterobacter	Enterobacter cloacae	Enterobacter cloacae strain AR_0154 plasmid unnamed4, complete sequence	NA	NA	NA	taxon:550	NA	NA	NA	NA	genomic DNA	Enterobacter cloacae	unnamed4	AR_0154	NA	NA	NA	NA	NA	NA	NA	NA	NA	NA	NA	NA	NA	NA	NA	NA	NA	NA	NA	NA	NA	NA	NA	NA	NA	NA
937	CP029718.1	circular	158987	Bacteria	Proteobacteria	Gammaproteobacteria	Enterobacterales	Enterobacteriaceae	Enterobacter	Enterobacter cloacae	Enterobacter cloacae strain AR_0154 plasmid unnamed5, complete sequence	NA	NA	NA	taxon:550	NA	NA	NA	NA	genomic DNA	Enterobacter cloacae	unnamed5	AR_0154	NA	NA	NA	NA	NA	NA	NA	NA	NA	NA	NA	NA	NA	NA	NA	NA	NA	NA	NA	NA	NA	NA	NA	NA	NA	NA
938	CP029719.1	circular	138933	Bacteria	Proteobacteria	Gammaproteobacteria	Enterobacterales	Enterobacteriaceae	Enterobacter	Enterobacter cloacae	Enterobacter cloacae strain AR_0154 plasmid unnamed1, complete sequence	NA	NA	NA	taxon:550	NA	NA	NA	NA	genomic DNA	Enterobacter cloacae	unnamed1	AR_0154	NA	NA	NA	NA	NA	NA	NA	NA	NA	NA	NA	NA	NA	NA	NA	NA	NA	NA	NA	NA	NA	NA	NA	NA	NA	NA
939	CP029720.1	circular	65672	Bacteria	Proteobacteria	Gammaproteobacteria	Enterobacterales	Enterobacteriaceae	Enterobacter	Enterobacter cloacae	Enterobacter cloacae strain AR_0154 plasmid unnamed2, complete sequence	NA	NA	NA	taxon:550	NA	NA	NA	NA	genomic DNA	Enterobacter cloacae	unnamed2	AR_0154	NA	NA	NA	NA	NA	NA	NA	NA	NA	NA	NA	NA	NA	NA	NA	NA	NA	NA	NA	NA	NA	NA	NA	NA	NA	NA
940	CP029721.1	circular	18990	Bacteria	Proteobacteria	Gammaproteobacteria	Enterobacterales	Enterobacteriaceae	Enterobacter	Enterobacter cloacae	Enterobacter cloacae strain AR_0154 plasmid unnamed3, complete sequence	NA	NA	NA	taxon:550	NA	NA	NA	NA	genomic DNA	Enterobacter cloacae	unnamed3	AR_0154	NA	NA	NA	NA	NA	NA	NA	NA	NA	NA	NA	NA	NA	NA	NA	NA	NA	NA	NA	NA	NA	NA	NA	NA	NA	NA
941	CP029723.1	circular	183663	Bacteria	Proteobacteria	Gammaproteobacteria	Enterobacterales	Enterobacteriaceae	Klebsiella	Klebsiella pneumoniae	Klebsiella pneumoniae strain AR_0140 plasmid unnamed1, complete sequence	NA	NA	NA	taxon:573	NA	NA	NA	NA	genomic DNA	Klebsiella pneumoniae	unnamed1	AR_0140	NA	NA	NA	NA	NA	NA	NA	NA	NA	NA	NA	NA	NA	NA	NA	NA	NA	NA	NA	NA	NA	NA	NA	NA	NA	NA
942	CP029724.1	circular	178561	Bacteria	Proteobacteria	Gammaproteobacteria	Enterobacterales	Enterobacteriaceae	Klebsiella	Klebsiella pneumoniae	Klebsiella pneumoniae strain AR_0140 plasmid unnamed2, complete sequence	NA	NA	NA	taxon:573	NA	NA	NA	NA	genomic DNA	Klebsiella pneumoniae	unnamed2	AR_0140	NA	NA	NA	NA	NA	NA	NA	NA	NA	NA	NA	NA	NA	NA	NA	NA	NA	NA	NA	NA	NA	NA	NA	NA	NA	NA
943	CP029726.1	circular	10024	Bacteria	Proteobacteria	Gammaproteobacteria	Enterobacterales	Morganellaceae	Proteus	Proteus mirabilis	Proteus mirabilis strain AR_0029 plasmid unnamed, complete sequence	NA	NA	NA	taxon:584	NA	NA	NA	NA	genomic DNA	Proteus mirabilis	unnamed	AR_0029	NA	NA	NA	NA	NA	NA	NA	NA	NA	NA	NA	NA	NA	NA	NA	NA	NA	NA	NA	NA	NA	NA	NA	NA	NA	NA
944	CP029728.1	circular	31764	Bacteria	Proteobacteria	Gammaproteobacteria	Enterobacterales	Enterobacteriaceae	Citrobacter	Citrobacter sp. CRE-46	Citrobacter sp. CRE-46 strain AR_0157 plasmid unnamed8, complete sequence	NA	NA	NA	taxon:1703250	NA	NA	NA	NA	genomic DNA	Citrobacter sp. CRE-46	unnamed8	AR_0157	NA	NA	NA	NA	NA	NA	NA	NA	NA	NA	NA	NA	NA	NA	NA	NA	NA	NA	NA	NA	NA	NA	NA	NA	NA	NA
945	CP029729.1	circular	250887	Bacteria	Proteobacteria	Gammaproteobacteria	Enterobacterales	Enterobacteriaceae	Citrobacter	Citrobacter sp. CRE-46	Citrobacter sp. CRE-46 strain AR_0157 plasmid unnamed1, complete sequence	NA	NA	NA	taxon:1703250	NA	NA	NA	NA	genomic DNA	Citrobacter sp. CRE-46	unnamed1	AR_0157	NA	NA	NA	NA	NA	NA	NA	NA	NA	NA	NA	NA	NA	NA	NA	NA	NA	NA	NA	NA	NA	NA	NA	NA	NA	NA
946	CP029730.1	circular	136246	Bacteria	Proteobacteria	Gammaproteobacteria	Enterobacterales	Enterobacteriaceae	Citrobacter	Citrobacter sp. CRE-46	Citrobacter sp. CRE-46 strain AR_0157 plasmid unnamed2, complete sequence	NA	NA	NA	taxon:1703250	NA	NA	NA	NA	genomic DNA	Citrobacter sp. CRE-46	unnamed2	AR_0157	NA	NA	NA	NA	NA	NA	NA	NA	NA	NA	NA	NA	NA	NA	NA	NA	NA	NA	NA	NA	NA	NA	NA	NA	NA	NA
947	CP029731.1	circular	108148	Bacteria	Proteobacteria	Gammaproteobacteria	Enterobacterales	Enterobacteriaceae	Citrobacter	Citrobacter sp. CRE-46	Citrobacter sp. CRE-46 strain AR_0157 plasmid unnamed3, complete sequence	NA	NA	NA	taxon:1703250	NA	NA	NA	NA	genomic DNA	Citrobacter sp. CRE-46	unnamed3	AR_0157	NA	NA	NA	NA	NA	NA	NA	NA	NA	NA	NA	NA	NA	NA	NA	NA	NA	NA	NA	NA	NA	NA	NA	NA	NA	NA
948	CP029732.1	circular	68384	Bacteria	Proteobacteria	Gammaproteobacteria	Enterobacterales	Enterobacteriaceae	Citrobacter	Citrobacter sp. CRE-46	Citrobacter sp. CRE-46 strain AR_0157 plasmid unnamed4, complete sequence	NA	NA	NA	taxon:1703250	NA	NA	NA	NA	genomic DNA	Citrobacter sp. CRE-46	unnamed4	AR_0157	NA	NA	NA	NA	NA	NA	NA	NA	NA	NA	NA	NA	NA	NA	NA	NA	NA	NA	NA	NA	NA	NA	NA	NA	NA	NA
949	CP029733.1	circular	83094	Bacteria	Proteobacteria	Gammaproteobacteria	Enterobacterales	Enterobacteriaceae	Citrobacter	Citrobacter sp. CRE-46	Citrobacter sp. CRE-46 strain AR_0157 plasmid unnamed5, complete sequence	NA	NA	NA	taxon:1703250	NA	NA	NA	NA	genomic DNA	Citrobacter sp. CRE-46	unnamed5	AR_0157	NA	NA	NA	NA	NA	NA	NA	NA	NA	NA	NA	NA	NA	NA	NA	NA	NA	NA	NA	NA	NA	NA	NA	NA	NA	NA
950	CP029734.1	circular	76953	Bacteria	Proteobacteria	Gammaproteobacteria	Enterobacterales	Enterobacteriaceae	Citrobacter	Citrobacter sp. CRE-46	Citrobacter sp. CRE-46 strain AR_0157 plasmid unnamed6, complete sequence	NA	NA	NA	taxon:1703250	NA	NA	NA	NA	genomic DNA	Citrobacter sp. CRE-46	unnamed6	AR_0157	NA	NA	NA	NA	NA	NA	NA	NA	NA	NA	NA	NA	NA	NA	NA	NA	NA	NA	NA	NA	NA	NA	NA	NA	NA	NA
951	CP029735.1	circular	63868	Bacteria	Proteobacteria	Gammaproteobacteria	Enterobacterales	Enterobacteriaceae	Citrobacter	Citrobacter sp. CRE-46	Citrobacter sp. CRE-46 strain AR_0157 plasmid unnamed7, complete sequence	NA	NA	NA	taxon:1703250	NA	NA	NA	NA	genomic DNA	Citrobacter sp. CRE-46	unnamed7	AR_0157	NA	NA	NA	NA	NA	NA	NA	NA	NA	NA	NA	NA	NA	NA	NA	NA	NA	NA	NA	NA	NA	NA	NA	NA	NA	NA
952	CP029737.1	circular	144970	Bacteria	Proteobacteria	Gammaproteobacteria	Enterobacterales	Morganellaceae	Providencia	Providencia rettgeri	Providencia rettgeri strain AR_0082 plasmid unnamed, complete sequence	NA	NA	NA	taxon:587	NA	NA	NA	NA	genomic DNA	Providencia rettgeri	unnamed	AR_0082	NA	NA	NA	NA	NA	NA	NA	NA	NA	NA	NA	NA	NA	NA	NA	NA	NA	NA	NA	NA	NA	NA	NA	NA	NA	NA
953	CP029739.1	circular	175746	Bacteria	Proteobacteria	Gammaproteobacteria	Enterobacterales	Enterobacteriaceae	Klebsiella	Klebsiella pneumoniae	Klebsiella pneumoniae strain AR_0087 plasmid unnamed1, complete sequence	NA	NA	NA	taxon:573	NA	NA	NA	NA	genomic DNA	Klebsiella pneumoniae	unnamed1	AR_0087	NA	NA	NA	NA	NA	NA	NA	NA	NA	NA	NA	NA	NA	NA	NA	NA	NA	NA	NA	NA	NA	NA	NA	NA	NA	NA
954	CP029740.1	circular	103250	Bacteria	Proteobacteria	Gammaproteobacteria	Enterobacterales	Enterobacteriaceae	Klebsiella	Klebsiella pneumoniae	Klebsiella pneumoniae strain AR_0087 plasmid unnamed2, complete sequence	NA	NA	NA	taxon:573	NA	NA	NA	NA	genomic DNA	Klebsiella pneumoniae	unnamed2	AR_0087	NA	NA	NA	NA	NA	NA	NA	NA	NA	NA	NA	NA	NA	NA	NA	NA	NA	NA	NA	NA	NA	NA	NA	NA	NA	NA
955	CP029742.1	circular	139740	Bacteria	Proteobacteria	Gammaproteobacteria	Enterobacterales	Enterobacteriaceae	Escherichia	Escherichia coli	Escherichia coli strain AR_0085 plasmid unnamed1, complete sequence	NA	NA	NA	taxon:562	NA	NA	NA	NA	genomic DNA	Escherichia coli	unnamed1	AR_0085	NA	NA	NA	NA	NA	NA	NA	NA	NA	NA	NA	NA	NA	NA	NA	NA	NA	NA	NA	NA	NA	NA	NA	NA	NA	NA
956	CP029743.1	circular	104555	Bacteria	Proteobacteria	Gammaproteobacteria	Enterobacterales	Enterobacteriaceae	Escherichia	Escherichia coli	Escherichia coli strain AR_0085 plasmid unnamed2, complete sequence	NA	NA	NA	taxon:562	NA	NA	NA	NA	genomic DNA	Escherichia coli	unnamed2	AR_0085	NA	NA	NA	NA	NA	NA	NA	NA	NA	NA	NA	NA	NA	NA	NA	NA	NA	NA	NA	NA	NA	NA	NA	NA	NA	NA
957	CP029744.1	circular	117192	Bacteria	Proteobacteria	Gammaproteobacteria	Enterobacterales	Enterobacteriaceae	Escherichia	Escherichia coli	Escherichia coli strain AR_0085 plasmid unnamed3, complete sequence	NA	NA	NA	taxon:562	NA	NA	NA	NA	genomic DNA	Escherichia coli	unnamed3	AR_0085	NA	NA	NA	NA	NA	NA	NA	NA	NA	NA	NA	NA	NA	NA	NA	NA	NA	NA	NA	NA	NA	NA	NA	NA	NA	NA
958	CP029748.1	circular	276880	Bacteria	Proteobacteria	Gammaproteobacteria	Enterobacterales	Enterobacteriaceae	Escherichia	Escherichia coli	Escherichia coli strain 2016C-3878 plasmid pMCR1-PA, complete sequence	Health Department	31-May-2016	USA	taxon:562	NA	Homo sapiens	Rectal swab	NA	genomic DNA	Escherichia coli	pMCR1-PA	2016C-3878	NA	NA	NA	NA	MCR-1 positive	NA	NA	NA	NA	NA	NA	NA	NA	NA	NA	NA	NA	NA	NA	NA	NA	NA	NA	NA	NA	NA
959	CP029779.1	circular	9080	Bacteria	Proteobacteria	Gammaproteobacteria	Enterobacterales	Enterobacteriaceae	Klebsiella	Klebsiella pneumoniae	Klebsiella pneumoniae strain WCHKP020034 plasmid p1_020034, complete sequence	NA	2017	China: Sichuan, Chengdu	taxon:573	NA	Homo sapiens	NA	NA	genomic DNA	Klebsiella pneumoniae	p1_020034	WCHKP020034	NA	NA	NA	NA	NA	NA	NA	NA	NA	NA	NA	NA	NA	NA	NA	NA	NA	NA	NA	NA	NA	NA	NA	NA	NA	NA
960	CU468231.1	circular	6106	Bacteria	Proteobacteria	Gammaproteobacteria	Pseudomonadales	Moraxellaceae	Acinetobacter	Acinetobacter baumannii	Acinetobacter baumannii SDF plasmid p1ABSDF, complete genome	NA	NA	NA	taxon:509170	NA	NA	NA	NA	genomic DNA	Acinetobacter baumannii SDF	p1ABSDF	SDF	NA	NA	NA	NA	NA	NA	NA	NA	NA	NA	NA	NA	NA	NA	NA	NA	NA	NA	NA	NA	NA	NA	NA	NA	NA	NA
961	CU468232.1	circular	25014	Bacteria	Proteobacteria	Gammaproteobacteria	Pseudomonadales	Moraxellaceae	Acinetobacter	Acinetobacter baumannii	Acinetobacter baumannii SDF plasmid p2ABSDF, complete genome	NA	NA	NA	taxon:509170	NA	NA	NA	NA	genomic DNA	Acinetobacter baumannii SDF	p2ABSDF	SDF	NA	NA	NA	NA	NA	NA	NA	NA	NA	NA	NA	NA	NA	NA	NA	NA	NA	NA	NA	NA	NA	NA	NA	NA	NA	NA
962	CU468233.1	circular	24922	Bacteria	Proteobacteria	Gammaproteobacteria	Pseudomonadales	Moraxellaceae	Acinetobacter	Acinetobacter baumannii	Acinetobacter baumannii SDF plasmid p3ABSDF, complete genome	NA	NA	NA	taxon:509170	NA	NA	NA	NA	genomic DNA	Acinetobacter baumannii SDF	p3ABSDF	SDF	NA	NA	NA	NA	NA	NA	NA	NA	NA	NA	NA	NA	NA	NA	NA	NA	NA	NA	NA	NA	NA	NA	NA	NA	NA	NA
963	CU928147.1	circular	119594	Bacteria	Proteobacteria	Gammaproteobacteria	Enterobacterales	Enterobacteriaceae	Escherichia	Escherichia coli	Escherichia coli str. ED1a plasmid pECOED, complete genome	NA	NA	NA	taxon:585397	NA	NA	NA	NA	genomic DNA	Escherichia coli ED1a	pECOED	ED1a	NA	NA	NA	NA	NA	NA	NA	NA	NA	NA	NA	NA	NA	NA	NA	NA	NA	NA	NA	NA	NA	NA	NA	NA	NA	NA
964	CU928148.1	circular	122301	Bacteria	Proteobacteria	Gammaproteobacteria	Enterobacterales	Enterobacteriaceae	Escherichia	Escherichia coli	Escherichia coli str. UMN026 plasmid p1ESCUM, complete genome	NA	NA	NA	taxon:585056	NA	NA	NA	NA	genomic DNA	Escherichia coli UMN026	p1ESCUM	UMN026	NA	NA	NA	NA	NA	NA	NA	NA	NA	NA	NA	NA	NA	NA	NA	NA	NA	NA	NA	NA	NA	NA	NA	NA	NA	NA
965	CU928149.1	circular	33809	Bacteria	Proteobacteria	Gammaproteobacteria	Enterobacterales	Enterobacteriaceae	Escherichia	Escherichia coli	Escherichia coli str. UMN026 plasmid p2ESCUM, complete genome	NA	NA	NA	taxon:585056	NA	NA	NA	NA	genomic DNA	Escherichia coli UMN026	p2ESCUM	UMN026	NA	NA	NA	NA	NA	NA	NA	NA	NA	NA	NA	NA	NA	NA	NA	NA	NA	NA	NA	NA	NA	NA	NA	NA	NA	NA
966	CU928159.2	circular	72482	Bacteria	Proteobacteria	Gammaproteobacteria	Enterobacterales	Enterobacteriaceae	Escherichia	Escherichia coli	Escherichia coli str. 55989 plasmid 55989p, complete genome	NA	NA	NA	taxon:585055	NA	NA	NA	NA	genomic DNA	Escherichia coli 55989	55989p	55989	NA	NA	NA	NA	NA	NA	NA	NA	NA	NA	NA	NA	NA	NA	NA	NA	NA	NA	NA	NA	NA	NA	NA	NA	NA	NA
967	DQ011112.1	circular	59474	Bacteria	Firmicutes	Bacilli	Lactobacillales	Streptococcaceae	Lactococcus	Lactococcus lactis	Lactococcus lactis subsp. cremoris MG1363 plasmid pFI430, complete sequence	NA	NA	NA	taxon:416870	NA	NA	NA	NA	genomic DNA	Lactococcus lactis subsp. cremoris MG1363	pFI430	MG1363	NA	cremoris	NA	NA	sex factor plasmid	NA	NA	NA	NA	NA	NA	NA	NA	NA	NA	NA	NA	NA	NA	NA	NA	NA	NA	NA	NA	NA
968	DQ011664.1	circular	2540	Bacteria	Actinobacteria	Actinobacteria	Bifidobacteriales	Bifidobacteriaceae	Bifidobacterium	Bifidobacterium catenulatum	Bifidobacterium catenulatum plasmid pBC1, complete sequence	NA	NA	NA	taxon:1686	NA	NA	NA	NA	genomic DNA	Bifidobacterium catenulatum	pBC1	L48	NA	NA	NA	NA	NA	NA	NA	NA	NA	NA	NA	NA	NA	NA	NA	NA	NA	NA	NA	NA	NA	NA	NA	NA	NA	NA
969	DQ017661.1	circular	99331	Bacteria	Proteobacteria	Gammaproteobacteria	Enterobacterales	Enterobacteriaceae	Salmonella	Salmonella enterica	Salmonella enterica plasmid pNF1358, complete sequence	NA	NA	NA	taxon:28901	NA	NA	NA	NA	genomic DNA	Salmonella enterica	pNF1358	NA	NA	NA	NA	NA	NA	NA	NA	NA	NA	NA	NA	NA	NA	NA	NA	NA	NA	NA	NA	NA	NA	NA	NA	NA	NA	NA
970	DQ058764.1	circular	244978	Bacteria	Proteobacteria	Alphaproteobacteria	Rhizobiales	Rhizobiaceae	Agrobacterium	Agrobacterium tumefaciens	Agrobacterium tumefaciens Ti plasmid pTiBo542, complete sequence	NA	NA	NA	taxon:358	NA	NA	NA	NA	genomic DNA	Agrobacterium tumefaciens	Ti plasmid pTiBo542	Bo542	NA	NA	NA	NA	NA	NA	NA	NA	NA	NA	NA	NA	NA	NA	NA	NA	NA	NA	NA	NA	NA	NA	NA	NA	NA	NA
971	DQ063224.1	circular	1298	Bacteria	Proteobacteria	Gammaproteobacteria	Xanthomonadales	Xanthomonadaceae	Xylella	Xylella fastidiosa	Xylella fastidiosa plasmid pUCLAa, complete sequence	NA	NA	NA	taxon:2371	NA	NA	NA	NA	genomic DNA	Xylella fastidiosa	pUCLAa	UCLA	NA	NA	NA	NA	Pierces disease strain	NA	NA	NA	NA	NA	NA	NA	NA	NA	NA	NA	NA	NA	NA	NA	NA	NA	NA	NA	NA	NA
972	DQ063226.1	circular	1284	Bacteria	Proteobacteria	Gammaproteobacteria	Xanthomonadales	Xanthomonadaceae	Xylella	Xylella fastidiosa	Xylella fastidiosa plasmid pUCLAc, complete sequence	NA	NA	NA	taxon:2371	NA	NA	NA	NA	genomic DNA	Xylella fastidiosa	pUCLAc	UCLA	NA	NA	NA	NA	Pierces disease strain	NA	NA	NA	NA	NA	NA	NA	NA	NA	NA	NA	NA	NA	NA	NA	NA	NA	NA	NA	NA	NA
973	DQ069059.1	circular	9631	Bacteria	Proteobacteria	Gammaproteobacteria	Vibrionales	Vibrionaceae	Photobacterium	Photobacterium damselae	Photobacterium damselae subsp. piscicida plasmid pPHDP10, complete sequence	NA	NA	NA	taxon:38294	NA	NA	NA	NA	genomic DNA	Photobacterium damselae subsp. piscicida	pPHDP10	NA	NA	piscicida	NA	MT1415	NA	NA	NA	NA	NA	NA	NA	NA	NA	NA	NA	NA	NA	NA	NA	NA	NA	NA	NA	NA	NA	NA
974	DQ089807.2	circular	16404	Bacteria	Firmicutes	Bacilli	Lactobacillales	Streptococcaceae	Lactococcus	Lactococcus lactis	Lactococcus lactis subsp. lactis bv. diacetylactis plasmid pDBORO, complete sequence	NA	NA	NA	taxon:44688	NA	NA	NA	NA	genomic DNA	Lactococcus lactis subsp. lactis bv. diacetylactis	pDBORO	DB0410	NA	lactis	NA	NA	biovar: diacetylactis	NA	NA	NA	NA	NA	NA	NA	NA	NA	NA	NA	NA	NA	NA	NA	NA	NA	NA	NA	NA	NA
975	DQ099911.1	circular	5529	Bacteria	Firmicutes	Bacilli	Lactobacillales	Lactobacillaceae	Lactobacillus	Lactobacillus plantarum	Lactobacillus plantarum cryptic plasmid pLJ42, complete sequence	NA	NA	NA	taxon:1590	NA	NA	NA	NA	genomic DNA	Lactobacillus plantarum	cryptic plasmid pLJ42	NA	NA	NA	NA	NA	NA	NA	NA	NA	NA	NA	NA	NA	NA	NA	NA	NA	NA	NA	NA	NA	NA	NA	NA	NA	NA	NA
976	DQ103758.1	circular	4815	Bacteria	Actinobacteria	Actinobacteria	Bifidobacteriales	Bifidobacteriaceae	Bifidobacterium	Bifidobacterium pseudolongum	Bifidobacterium pseudolongum subsp. globosum plasmid pASV479, complete sequence	NA	NA	NA	taxon:1690	NA	NA	NA	NA	genomic DNA	Bifidobacterium pseudolongum subsp. globosum	pASV479	NA	NA	globosum	NA	NA	NA	NA	NA	NA	NA	NA	NA	NA	NA	NA	NA	NA	NA	NA	NA	NA	NA	NA	NA	NA	NA	NA
977	DQ115387.2	circular	34595	Bacteria	Proteobacteria	Gammaproteobacteria	Enterobacterales	Enterobacteriaceae	Salmonella	Salmonella enterica	Salmonella enterica subsp. enterica serovar Dublin serovar Dublin plasmid pOU1114, complete sequence	NA	NA	NA	taxon:98360	NA	NA	NA	NA	genomic DNA	Salmonella enterica subsp. enterica serovar Dublin	pOU1114	OU7025	Dublin	enterica	NA	NA	NA	NA	NA	NA	NA	NA	NA	NA	NA	NA	NA	NA	NA	NA	NA	NA	NA	NA	NA	NA	NA	NA
978	DQ115388.2	circular	74589	Bacteria	Proteobacteria	Gammaproteobacteria	Enterobacterales	Enterobacteriaceae	Salmonella	Salmonella enterica	Salmonella enterica subsp. enterica serovar Dublin serovar Dublin plasmid pOU1115, complete sequence	NA	NA	NA	taxon:98360	NA	NA	NA	NA	genomic DNA	Salmonella enterica subsp. enterica serovar Dublin	pOU1115	Lane OU7432	Dublin	enterica	NA	NA	NA	NA	NA	NA	NA	NA	NA	NA	NA	NA	NA	NA	NA	NA	NA	NA	NA	NA	NA	NA	NA	NA
979	DQ116709.1	circular	3497	Bacteria	Firmicutes	Bacilli	Lactobacillales	Lactobacillaceae	Lactobacillus	Lactobacillus casei	Lactobacillus casei plasmid pSMA23, complete sequence	NA	NA	NA	taxon:1582	NA	NA	NA	NA	genomic DNA	Lactobacillus casei	pSMA23	NA	NA	NA	NA	A23	NA	NA	NA	NA	NA	NA	NA	NA	NA	NA	NA	NA	NA	NA	NA	NA	NA	NA	NA	NA	NA	NA
980	DQ119295.1	circular	3773	Bacteria	Tenericutes	Mollicutes	Acholeplasmatales	Acholeplasmataceae	Candidatus Phytoplasma	Candidatus Phytoplasma australiense	Candidatus Phytoplasma australiense plasmid pCPa, complete sequence	NA	NA	NA	taxon:59748	NA	NA	NA	NA	genomic DNA	Candidatus Phytoplasma australiense	pCPa	NA	NA	NA	NA	NA	NA	NA	NA	NA	NA	NA	NA	NA	NA	NA	NA	NA	NA	NA	NA	NA	NA	NA	NA	NA	NA	NA
981	DQ119297.1	circular	3319	Bacteria	Tenericutes	Mollicutes	Acholeplasmatales	Acholeplasmataceae	Candidatus Phytoplasma	Tomato big bud phytoplasma	Tomato big bud phytoplasma plasmid pTBBperi, complete sequence	NA	NA	NA	taxon:35770	NA	Catharanthus roseus	NA	NA	genomic DNA	Tomato big bud phytoplasma	pTBBperi	NA	NA	NA	NA	NA	NA	NA	NA	NA	NA	NA	NA	NA	NA	NA	NA	NA	NA	NA	NA	NA	NA	NA	NA	NA	NA	NA
982	DQ126685.1	circular	55216	Bacteria	Proteobacteria	Gammaproteobacteria	Pseudomonadales	Pseudomonadaceae	Pseudomonas	Pseudomonas sp. CT14	Pseudomonas sp. CT14 plasmid pCT14, complete sequence	NA	NA	NA	taxon:341029	NA	NA	NA	NA	genomic DNA	Pseudomonas sp. CT14	pCT14	CT14	NA	NA	NA	NA	NA	NA	NA	NA	NA	NA	NA	NA	NA	NA	NA	NA	NA	NA	NA	NA	NA	NA	NA	NA	NA	NA
983	DQ140180.1	circular	5841	Bacteria	Actinobacteria	Actinobacteria	Corynebacteriales	Nocardiaceae	Nocardia	Nocardia sp. C-14-1	Nocardia sp. C-14-1 plasmid pC1, complete sequence	NA	NA	NA	taxon:312532	NA	NA	NA	NA	genomic DNA	Nocardia sp. C-14-1	pC1	C-14-1	NA	NA	NA	NA	NA	NA	NA	NA	NA	NA	NA	NA	NA	NA	NA	NA	NA	NA	NA	NA	NA	NA	NA	NA	NA	NA
984	DQ140187.1	circular	6704	Bacteria	Firmicutes	Bacilli	Bacillales	Bacillaceae	Bacillus	Bacillus subtilis	Bacillus subtilis strain ATCC 15841 plasmid pPL1, complete sequence	NA	NA	NA	ATCC:15841, taxon:1423	NA	NA	NA	NA	genomic DNA	Bacillus subtilis	pPL1	ATCC 15841	NA	NA	NA	NA	NA	NA	NA	NA	NA	NA	NA	NA	NA	NA	NA	NA	NA	NA	NA	NA	NA	NA	NA	NA	NA	NA
985	DQ145546.1	circular	144170	Bacteria	Proteobacteria	Alphaproteobacteria	Rhizobiales	Rhizobiaceae	Sinorhizobium	Sinorhizobium meliloti	Sinorhizobium meliloti plasmid pSmeSM11a, complete sequence	NA	NA	NA	taxon:382	NA	NA	isolated from an indigenous Sinorhizobium meliloti strain nodulating alfalfa	NA	genomic DNA	Sinorhizobium meliloti	pSmeSM11a	NA	NA	NA	NA	NA	NA	NA	NA	NA	NA	NA	NA	NA	NA	NA	NA	NA	NA	NA	NA	NA	NA	NA	NA	NA	NA	NA
986	DQ149242.1	circular	10372	Bacteria	Firmicutes	Bacilli	Lactobacillales	Streptococcaceae	Lactococcus	Lactococcus lactis	Lactococcus lactis plasmid pSK11A, complete sequence	NA	NA	NA	taxon:1358	NA	NA	NA	NA	genomic DNA	Lactococcus lactis	pSK11A	SK11	NA	NA	NA	NA	NA	NA	NA	NA	NA	NA	NA	NA	NA	NA	NA	NA	NA	NA	NA	NA	NA	NA	NA	NA	NA	NA
987	DQ149243.1	circular	13332	Bacteria	Firmicutes	Bacilli	Lactobacillales	Streptococcaceae	Lactococcus	Lactococcus lactis	Lactococcus lactis plasmid pSK11B, complete sequence	NA	NA	NA	taxon:1358	NA	NA	NA	NA	genomic DNA	Lactococcus lactis	pSK11B	SK11	NA	NA	NA	NA	NA	NA	NA	NA	NA	NA	NA	NA	NA	NA	NA	NA	NA	NA	NA	NA	NA	NA	NA	NA	NA	NA
988	DQ149244.1	circular	47165	Bacteria	Firmicutes	Bacilli	Lactobacillales	Streptococcaceae	Lactococcus	Lactococcus lactis	Lactococcus lactis plasmid pSK11L, complete sequence	NA	NA	NA	taxon:1358	NA	NA	NA	NA	genomic DNA	Lactococcus lactis	pSK11L	SK11	NA	NA	NA	NA	NA	NA	NA	NA	NA	NA	NA	NA	NA	NA	NA	NA	NA	NA	NA	NA	NA	NA	NA	NA	NA	NA
989	DQ149245.1	circular	75814	Bacteria	Firmicutes	Bacilli	Lactobacillales	Streptococcaceae	Lactococcus	Lactococcus lactis	Lactococcus lactis plasmid pSK11P, complete sequence	NA	NA	NA	taxon:1358	NA	NA	NA	NA	genomic DNA	Lactococcus lactis	pSK11P	SK11	NA	NA	NA	NA	NA	NA	NA	NA	NA	NA	NA	NA	NA	NA	NA	NA	NA	NA	NA	NA	NA	NA	NA	NA	NA	NA
990	DQ173493.1	circular	3578	Bacteria	Firmicutes	Bacilli	Lactobacillales	Streptococcaceae	Streptococcus	Streptococcus dysgalactiae	Streptococcus dysgalactiae subsp. equisimilis strain T132 plasmid pSdyT132, complete sequence	NA	NA	NA	taxon:119602	NA	NA	NA	NA	genomic DNA	Streptococcus dysgalactiae subsp. equisimilis	pSdyT132	T132	NA	equisimilis	NA	NA	Lancefield group G	NA	NA	NA	NA	NA	NA	NA	NA	NA	NA	NA	NA	NA	NA	NA	NA	NA	NA	NA	NA	NA
991	DQ176855.1	circular	5486	Bacteria	Proteobacteria	Gammaproteobacteria	Pasteurellales	Pasteurellaceae	Actinobacillus	Actinobacillus pleuropneumoniae	Actinobacillus pleuropneumoniae plasmid p11745, complete sequence	NA	NA	NA	taxon:715	NA	NA	NA	NA	genomic DNA	Actinobacillus pleuropneumoniae	p11745	APP11745	7	NA	NA	NA	tatracycline resistance plasmid	NA	NA	NA	NA	NA	NA	NA	NA	NA	NA	NA	NA	NA	NA	NA	NA	NA	NA	NA	NA	NA
992	DQ185139.1	circular	2062	Bacteria	Firmicutes	Bacilli	Bacillales	Bacillaceae	Bacillus	Bacillus thuringiensis	Bacillus thuringiensis serovar rongseni plasmid pBMB2062-56, complete genome	NA	NA	NA	taxon:180865	NA	NA	NA	NA	genomic DNA	Bacillus thuringiensis serovar rongseni	pBMB2062-56	H56	rongseni	NA	NA	NA	NA	NA	NA	NA	NA	NA	NA	NA	NA	NA	NA	NA	NA	NA	NA	NA	NA	NA	NA	NA	NA	NA
993	DQ185143.1	circular	2061	Bacteria	Firmicutes	Bacilli	Bacillales	Bacillaceae	Bacillus	Bacillus thuringiensis	Bacillus thuringiensis serovar canadensis plasmid pBMB2062-4ac, complete genome	NA	NA	NA	taxon:180855	NA	NA	NA	NA	genomic DNA	Bacillus thuringiensis serovar canadensis	pBMB2062-4ac	H4ac	canadensis	NA	NA	NA	NA	NA	NA	NA	NA	NA	NA	NA	NA	NA	NA	NA	NA	NA	NA	NA	NA	NA	NA	NA	NA	NA
994	DQ186900.1	circular	2334	Bacteria	Firmicutes	Negativicutes	Selenomonadales	Selenomonadaceae	Selenomonas	Selenomonas ruminantium	Selenomonas ruminantium strain 19 plasmid pSRD192, complete sequence	NA	NA	NA	taxon:971	NA	NA	NA	NA	genomic DNA	Selenomonas ruminantium	pSRD192	19	NA	NA	NA	NA	NA	NA	NA	NA	NA	NA	NA	NA	NA	NA	NA	NA	NA	NA	NA	NA	NA	NA	NA	NA	NA	NA
995	DQ198799.1	circular	8108	Bacteria	Proteobacteria	Epsilonproteobacteria	Campylobacterales	Helicobacteraceae	Helicobacter	Helicobacter pylori	Helicobacter pylori strain CCUG 17874 plasmid pHP666, complete sequence	NA	NA	NA	taxon:210	NA	NA	NA	NA	genomic DNA	Helicobacter pylori	pHP666	CCUG 17874; NCTC 11638	NA	NA	NA	NA	NA	NA	NA	NA	NA	NA	NA	NA	NA	NA	NA	NA	NA	NA	NA	NA	NA	NA	NA	NA	NA	NA
996	DQ220741.1	circular	11661	Bacteria	Firmicutes	Bacilli	Lactobacillales	Lactobacillaceae	Pediococcus	Pediococcus acidilactici	Pediococcus acidilactici plasmid pEOC01, complete sequence	NA	NA	NA	taxon:1254	NA	NA	NA	NA	genomic DNA	Pediococcus acidilactici	pEOC01	NCIMB 6990	NA	NA	NA	NA	erythromycin resistance plasmid	NA	NA	NA	NA	NA	NA	NA	NA	NA	NA	NA	NA	NA	NA	NA	NA	NA	NA	NA	NA	NA
997	DQ223897.1	circular	7318	Bacteria	Proteobacteria	Betaproteobacteria	Neisseriales	Neisseriaceae	Neisseria	Neisseria lactamica	Neisseria lactamica plasmid pNL3.1, complete sequence	NA	NA	NA	taxon:486	NA	NA	NA	NA	genomic DNA	Neisseria lactamica	pNL3.1	NA	NA	NA	NA	3207487	NA	NA	NA	NA	NA	NA	NA	NA	NA	NA	NA	NA	NA	NA	NA	NA	NA	NA	NA	NA	NA	NA
998	DQ223898.1	circular	1986	Bacteria	Proteobacteria	Betaproteobacteria	Neisseriales	Neisseriaceae	Neisseria	Neisseria lactamica	Neisseria lactamica plasmid pNL750149, complete sequence	NA	NA	NA	taxon:486	NA	NA	NA	NA	genomic DNA	Neisseria lactamica	pNL750149	NA	NA	NA	NA	750149	NA	NA	NA	NA	NA	NA	NA	NA	NA	NA	NA	NA	NA	NA	NA	NA	NA	NA	NA	NA	NA	NA
999	DQ223899.1	circular	1986	Bacteria	Proteobacteria	Betaproteobacteria	Neisseriales	Neisseriaceae	Neisseria	Neisseria lactamica	Neisseria lactamica plasmid pNL932024, complete sequence	NA	NA	NA	taxon:486	NA	NA	NA	NA	genomic DNA	Neisseria lactamica	pNL932024	NA	NA	NA	NA	932024	NA	NA	NA	NA	NA	NA	NA	NA	NA	NA	NA	NA	NA	NA	NA	NA	NA	NA	NA	NA	NA	NA
1000	DQ227323.1	circular	2251	Bacteria	Proteobacteria	Betaproteobacteria	Neisseriales	Neisseriaceae	Neisseria	Neisseria lactamica	Neisseria lactamica isolate 102739 plasmid pNL11, complete sequence	NA	NA	NA	taxon:486	NA	NA	NA	NA	genomic DNA	Neisseria lactamica	pNL11	NA	NA	NA	NA	102739	NA	NA	NA	NA	NA	NA	NA	NA	NA	NA	NA	NA	NA	NA	NA	NA	NA	NA	NA	NA	NA	NA
1001	DQ227324.1	circular	2248	Bacteria	Proteobacteria	Betaproteobacteria	Neisseriales	Neisseriaceae	Neisseria	Neisseria lactamica	Neisseria lactamica isolate 9225393 plasmid pNL7.1, complete sequence	NA	NA	NA	taxon:486	NA	NA	NA	NA	genomic DNA	Neisseria lactamica	pNL7.1	NA	NA	NA	NA	9225393	NA	NA	NA	NA	NA	NA	NA	NA	NA	NA	NA	NA	NA	NA	NA	NA	NA	NA	NA	NA	NA	NA
[truncated: 11,083 more rows]
[truncated: 2 more columns]
