# Supplementary material for: Analysis of COMPASS, a New Comprehensive Plasmid Database Revealed Prevalence of Multireplicon and Extensive Diversity of IncF Plasmids
Source: Front Microbiol. 2020 Mar 24;11:483. doi: 10.3389/fmicb.2020.00483 (PMC7105883; doi:10.3389/fmicb.2020.00483)
Supplement: TABLE S5 — MOB-typer results. [file Table_5.XLSX]

## Sheet: COMPASS_typing
#	file_id	rep_type(s)	rep_type_accession(s)	relaxase_type(s)	relaxase_type_accession(s)	mpf_type	mpf_type_accession(s)	orit_type(s)	orit_accession(s)	Predicted Mobility
1	AB007909.1	rep_cluster_1324	000643__NC_019340_00005	-	-	-	-	-	-	Non-mobilizable
2	AB024514.1	rep_cluster_1102	000359__AB024514_00001	-	-	-	-	-	-	Non-mobilizable
3	AB079380.1	rep_cluster_556	001944__MF150537	-	-	-	-	MOBP	NC_004566	Mobilizable
4	AB109805.1	IncQ1	000191__AB109805_00009	MOBQ	NC_005312_00007	-	-	MOBQ	KY463220	Mobilizable
5	AB116387.1	-	-	-	-	-	-	-	-	Non-mobilizable
6	AB118106.1	rep_cluster_707	002182__CP018327	MOBQ	NC_005952_00012	-	-	-	-	Mobilizable
7	AB193120.1	-	-	-	-	-	-	-	-	Non-mobilizable
8	AB211496.1	rep_cluster_912	002397__NC_006975_00002	-	-	-	-	-	-	Non-mobilizable
9	AB534719.1	rep_cluster_1286	000604__NC_014466_00005	-	-	-	-	-	-	Non-mobilizable
10	AE001272.1	rep_cluster_664	002123__AE001272_00061	MOBQ	NC_001949_00004	MPF_T	NC_001949_00010,NC_001949_00016	-	-	Conjugative
11	AE002565.1	rep_cluster_971	002455__NC_002630_00002	MOBC	NC_002630_00014	-	-	-	-	Mobilizable
12	AE007872.2	-	-	MOBQ	NC_015184_00319	MPF_T	NC_015184_00383,NC_003064_00176,NC_015184_00316,NC_015184_00389,NC_015184_00386	-	-	Conjugative
13	AE011191.1	rep_cluster_163	001021__NC_002146_00042	MOB_Unknown	DQ025752	MPF_T	NC_020240_00009	-	-	Conjugative
14	AE016855.1	rep_cluster_283	001567__AE016855_00001	MOBP	NC_004632_00034	MPF_I	NC_004632_00055,NC_004633_00070,NC_004632_00061,NC_004633_00060,NC_004633_00050,NC_004633_00077,NC_004632_00060,NC_004632_00056,NC_004632_00059	-	-	Conjugative
15	AE017171.1	rep_cluster_1281,rep_cluster_1142	000597__NC_005054_00023,000421__NC_013320_00022	MOBQ	NC_013653_00017	MPF_T	NC_013653_00035,NC_010279_00007	-	-	Conjugative
16	AF001314.2	rep_cluster_554	001938__AF001314_00001	-	-	-	-	MOBP	NC_002636	Mobilizable
17	AF003958.2	-	-	-	-	-	-	MOBP	NC_013366	Mobilizable
18	AF015088.1	rep_cluster_1639	001038__NC_003846_00008	-	-	-	-	-	-	Non-mobilizable
19	AF022180.1	rep_cluster_1535	000898__NC_004968_00001	-	-	-	-	-	-	Non-mobilizable
20	AF022647.1	rep_cluster_457	001802__AF022647	MOBP	NC_004974_00002	-	-	-	-	Mobilizable
21	AF025795.1	ColRNAI_rep_cluster_1987	000019__CP000651_00005	MOBP	NC_001848_00006	-	-	MOBP	KT693145	Mobilizable
22	AF027303.1	rep_cluster_1762	001180__NC_001843_00001	-	-	-	-	-	-	Non-mobilizable
23	AF028735.2	-	-	-	-	-	-	-	-	Non-mobilizable
24	AF036485.2	rep_cluster_554,rep_cluster_656,rep_cluster_414,rep_cluster_414	001940__CP020608_00001,002110__KM007160_00048,001745__CP002369_00001,001737__NC_004960_00001	MOB_Unknown,MOBP	JQ821353,NC_019350_00002	-	-	MOBQ,MOBP,MOBP	CP007015,NC_013321,CP016739	Mobilizable
25	AF036712.1	Inc13	000073__AF036712_00003	MOBV	NC_001858_00003	-	-	-	-	Mobilizable
26	AF041836.1	rep_cluster_1374	000710__NC_001910_00001	-	-	-	-	-	-	Non-mobilizable
27	AF047385.1	rep_cluster_1136	000415__NC_005021_00001	-	-	-	-	-	-	Non-mobilizable
28	AF047696.1	rep_cluster_1136	000415__NC_005021_00001	-	-	-	-	-	-	Non-mobilizable
29	AF050494.1	-	-	-	-	MPF_F	NC_002757_00002	-	-	Non-mobilizable
30	AF051917.1	rep_cluster_1281,rep_cluster_1017,rep_cluster_1142,rep_cluster_1018	000597__NC_005054_00023,000264__NC_017336_00001,000421__NC_013320_00022,000268__U32369_00002	MOBV,MOBQ	NC_022618_00010,NC_013653_00017	MPF_T	NC_010279_00007,NC_013653_00035	-	-	Conjugative
31	AF052650.1	rep_cluster_159	000964__AF052650	-	-	-	-	-	-	Non-mobilizable
32	AF053946.1	rep_cluster_645,IncFII	002101__NC_004564_00056,000122__JQ418538	MOBF	NC_010157_00072	-	-	-	-	Mobilizable
33	AF053947.1	IncFIB	000104__CP010386_00052	-	-	-	-	-	-	Non-mobilizable
34	AF055345.1	rep_cluster_961	002447__NC_002109_00002	-	-	-	-	-	-	Non-mobilizable
35	AF056496.1	rep_cluster_60	002033__AF056496_00001	-	-	-	-	-	-	Non-mobilizable
36	AF065404.1	rep_cluster_125	000558__CP013279	MOBP	NC_012579_00171	MPF_unknown	NC_017203_00099	-	-	Conjugative
37	AF069302.1	rep_cluster_640	002095__NC_001277_00006	MOBP	NC_002126_00002	MPF_T	NC_001277_00002	MOBP	NC_008487	Conjugative
38	AF074612.1	rep_cluster_645,IncFII	002101__NC_004564_00056,000122__JQ418538	MOBF	NC_010157_00072	-	-	-	-	Mobilizable
39	AF077006.1	rep_cluster_144	000780__NC_001476_00003	-	-	-	-	-	-	Non-mobilizable
40	AF082180.1	rep_cluster_1262	000574__NC_002130_00004	-	-	-	-	-	-	Non-mobilizable
41	AF085719.1	rep_cluster_680	002147__AF085719_00006	-	-	-	-	-	-	Non-mobilizable
42	AF091592.1	-	-	MOBV,MOBV	NZ_AKYF01000029_00006,NC_005311_00009	-	-	-	-	Mobilizable
43	AF092037.1	rep_cluster_209	001476__NC_010243_00004	-	-	-	-	-	-	Non-mobilizable
44	AF093750.2	rep_cluster_1118	000384__AF093750_00001	-	-	-	-	-	-	Non-mobilizable
45	AF102990.1	IncFII,rep_cluster_645	000122__JQ418538,002101__NC_004564_00056	MOBF	NC_015475_00074	-	-	-	-	Mobilizable
46	AF109691.1	rep_cluster_64	002093__AF109691_00007	-	-	-	-	-	-	Non-mobilizable
47	AF110140.1	-	-	-	-	-	-	-	-	Non-mobilizable
48	AF112856.1	-	-	-	-	-	-	-	-	Non-mobilizable
49	AF113972.1	-	-	-	-	-	-	-	-	Non-mobilizable
50	AF121418.1	rep_cluster_961	002447__NC_002109_00002	-	-	-	-	-	-	Non-mobilizable
51	AF128883.1	rep_cluster_1733	001150__NC_013330_00017	-	-	-	-	-	-	Non-mobilizable
52	AF129811.3	rep_cluster_396	001719__AF129811_00012	MOBP	NC_011131_00010	-	-	-	-	Mobilizable
53	AF131076.1	rep_cluster_478	001833__NC_011526_00036	-	-	-	-	-	-	Non-mobilizable
54	AF135182.5	rep_cluster_1057	000299__NZ_CP013047_00062	MOBP	NC_002523_00131	MPF_I	NC_002523_00144,NC_002523_00141,NC_002523_00134,NC_002523_00008,NC_002523_00002,NC_002523_00146,NC_002523_00145,NC_002523_00001	-	-	Conjugative
55	AF141869.1	-	-	-	-	-	-	-	-	Non-mobilizable
56	AF152923.1	ColRNAI_rep_cluster_1956	000016__NC_002144	-	-	MPF_T	NC_002144_00007	-	-	Non-mobilizable
57	AF153414.1	rep_cluster_556	001944__MF150537	-	-	-	-	MOBP	NC_004566	Mobilizable
58	AF156893.2	ColRNAI_rep_cluster_1987	000019__CP000651_00005	-	-	-	-	-	-	Non-mobilizable
59	AF159249.1	rep_cluster_457	001803__AF159249	MOBP	NC_004974_00002	-	-	-	-	Mobilizable
60	AF164559.3	rep_cluster_1070	000318__NC_005010_00009	MOBP	NC_005010_00008	-	-	-	-	Mobilizable
61	AF188935.1	rep_cluster_163	001021__NC_002146_00042	MOBP,MOB_Unknown	NC_012655_00001,DQ025752	MPF_T	NC_020240_00009	-	-	Conjugative
62	AF196967.2	Inc13	000059__FN394966_00002	MOBV	NC_016034_00003	-	-	-	-	Mobilizable
63	AF197335.1	ColRNAI_rep_cluster_1857	000008__AJ627566	-	-	-	-	MOBP,MOB_unknown	NZ_CP012501,NC_019986	Mobilizable
64	AF200347.3	-	-	-	-	-	-	-	-	Non-mobilizable
65	AF202532.3	rep_cluster_617	002066__NC_020243_00001	MOBP	NC_020243_00005	-	-	-	-	Mobilizable
66	AF205068.1	rep_cluster_1187	000471__NC_004532_00002	-	-	-	-	-	-	Non-mobilizable
67	AF207855.1	rep_cluster_556	001944__MF150537	-	-	-	-	MOBP	NC_004566	Mobilizable
68	AF226280.2	rep_cluster_1502	000843__CP000550	MOBP	NZ_AZNS01000034_00021	MPF_T	NC_005012_00001,NC_005012_00002,NC_017284_00007,NC_017284_00011,NC_005012_00053	-	-	Conjugative
69	AF233873.1	-	-	-	-	-	-	-	-	Non-mobilizable
70	AF236060.1	rep_cluster_64	002093__AF109691_00007	-	-	-	-	-	-	Non-mobilizable
71	AF241888.2	rep_cluster_1256	000567__NC_011522_00012	MOBP	NC_011522_00002	-	-	MOBP	NC_025179	Mobilizable
72	AF244083.1	ColRNAI_rep_cluster_1987	000019__CP000651_00005	-	-	-	-	-	-	Non-mobilizable
73	AF244084.1	rep_cluster_1164	000444__AF244084_00005	-	-	-	-	-	-	Non-mobilizable
74	AF247159.1	rep_cluster_520	001895__AF116286_00005	-	-	-	-	-	-	Non-mobilizable
75	AF264948.1	rep_cluster_1099	000354__NC_018978_00001	-	-	-	-	-	-	Non-mobilizable
76	AF273219.1	-	-	-	-	-	-	-	-	Non-mobilizable
77	AF275307.1	rep_cluster_137	000692__CP012906	-	-	-	-	-	-	Non-mobilizable
78	AF282884.1	ColRNAI_rep_cluster_1857	000008__AJ627566	MOBP,MOBP	NC_017321_00002,NC_020251_00005	-	-	MOBP	NC_010485	Mobilizable
79	AF291751.1	-	-	-	-	-	-	-	-	Non-mobilizable
80	AF292711.1	-	-	-	-	-	-	-	-	Non-mobilizable
81	AF295336.1	-	-	-	-	-	-	-	-	Non-mobilizable
82	AF300473.1	ColRNAI_rep_cluster_1857	000008__AJ627566	-	-	-	-	MOBP,MOB_unknown	NZ_CP012632,NC_019986	Mobilizable
83	AF301164.1	rep_cluster_896	002377__NC_008438_00001	-	-	-	-	-	-	Non-mobilizable
84	AF302424.1	rep_cluster_1012	000246__KX753679_00001	MOBP	NC_002579_00003	MPF_T	NC_002579_00023,NC_002579_00026,NC_002579_00027,NC_002579_00032,NC_021724_00034	-	-	Conjugative
85	AF303375.1	-	-	MOBF	NC_019255_00001	-	-	-	-	Mobilizable
86	AF305615.1	-	-	MOBF	NC_002632_00006	-	-	-	-	Mobilizable
87	AF306799.1	rep_cluster_414	001743__AF306799_00002	-	-	-	-	MOBP	NC_005312	Mobilizable
88	AF310974.1	rep_cluster_1854	001283__AF310974_00001	-	-	-	-	-	-	Non-mobilizable
89	AF311902.1	ColRNAI_rep_cluster_1857	000008__AJ627566	MOBF	CP019897	-	-	MOB_unknown	CP010128	Mobilizable
90	AF312688.1	-	-	-	-	-	-	-	-	Non-mobilizable
91	AF327371.1	-	-	MOBV	NC_004965_00006	-	-	-	-	Mobilizable
92	AF339846.1	rep_cluster_217	001486__NC_002806_00004	MOBP	NC_002806_00067	-	-	-	-	Mobilizable
93	AF359557.1	rep_cluster_283	001570__NC_002759_00001	-	-	-	-	-	-	Non-mobilizable
94	AF359574.1	rep_cluster_940	002424__AF359574	-	-	-	-	-	-	Non-mobilizable
95	AF364477.1	-	-	-	-	-	-	-	-	Non-mobilizable
96	AF378372.1	rep_cluster_1523	000878__NC_004947_00002	-	-	-	-	-	-	Non-mobilizable
97	AF380336.1	rep_cluster_1523	000877__NC_002799_00001	-	-	-	-	-	-	Non-mobilizable
98	AF386526.1	IncFII,IncFIIA	000121__CP024805,000136__AP014877_00014	MOBF	NC_011980_00044	-	-	-	-	Mobilizable
99	AF416330.1	rep_cluster_1016	000250__NC_008042_00016	-	-	-	-	-	-	Non-mobilizable
100	AF416331.1	rep_cluster_558,rep_cluster_392	001955__AF416331_00126,001717__CP019309	MOBP	NC_023148_00033	MPF_T	NC_004574_00087,NC_009955_00053,NC_008042_00056,NC_009955_00049,NC_023148_00034,NC_004574_00081	-	-	Conjugative
101	AF438419.1	rep_cluster_1229	000525__CP006247_00002	-	-	-	-	-	-	Non-mobilizable
102	AF441790.2	-	-	-	-	-	-	-	-	Non-mobilizable
103	AF447808.1	rep_cluster_974	002459__AF447808_00011	MOBP	NC_004058_00030	MPF_T	NC_007206_00022,NC_004058_00017,NC_007206_00021,NC_004058_00024	-	-	Conjugative
104	AF459640.1	rep_cluster_689	002154__CP003139_00001	-	-	-	-	-	-	Non-mobilizable
105	AF469112.1	rep_cluster_137	000693__AF469112_00007	MOBP	NC_004950_00003	-	-	-	-	Mobilizable
106	AF469113.1	rep_cluster_137	000691__NC_020556_00001	-	-	-	-	-	-	Non-mobilizable
107	AF479770.1	-	-	-	-	-	-	-	-	Non-mobilizable
108	AF479774.1	ColRNAI_rep_cluster_1987	000019__CP000651_00005	-	-	-	-	-	-	Non-mobilizable
109	AF482428.1	-	-	MOBV	NC_004160_00001	-	-	-	-	Mobilizable
110	AF486522.1	-	-	-	-	-	-	-	-	Non-mobilizable
111	AF491307.2	rep_cluster_1907	001342__AF491307	MOBF	NC_012674_00085	MPF_T	NC_007926_00034,NC_007926_00094,NC_007926_00096,NC_004999_00101,NC_007926_00095	-	-	Conjugative
112	AF492560.1	-	-	MOBF,MOBP	NC_005001_00009,NC_004774_00025	-	-	-	-	Mobilizable
113	AF497970.1	ColRNAI_rep_cluster_1987	000019__CP000651_00005	-	-	-	-	MOBP	AJ001708	Mobilizable
114	AF511037.1	rep_cluster_1425	000765__EU370687_00001	-	-	-	-	-	-	Non-mobilizable
115	AF516141.1	-	-	-	-	-	-	-	-	Non-mobilizable
116	AF527822.1	ColRNAI_rep_cluster_1987	000019__CP000651_00005	-	-	-	-	-	-	Non-mobilizable
117	AF533985.1	-	-	MOBP	NC_004931_00010	-	-	-	-	Mobilizable
118	AF546865.2	-	-	-	-	-	-	-	-	Non-mobilizable
119	AF550415.2	rep_cluster_1254,IncL/M	000562__KT346360_00001,000148__NC_021488_00028	MOBP	NC_004464_00056	MPF_I	NC_005246_00069,NC_019154_00069,NC_004464_00105,NC_004464_00066,NC_004464_00073,NC_004464_00068,NC_019344_00078,NC_019063_00094,NC_005246_00057	-	-	Conjugative
120	AF550679.1	IncFIIA,IncFIB,IncFII	000136__AP014877_00014,000095__NZ_CP014273_00094,000121__CP024805	MOBF,MOBP	NC_017627_00068,NC_021576_00050	MPF_F	NC_017639_00094,NC_008460_00107,NC_019094_00090,NC_010409_00124,NC_017054_00096,NC_022651_00077,NC_010488_00021,08-5333_00200,NC_007675_00027,NC_013437_00116,NC_014615_00033,NC_018966_00040	MOBF	DQ286390	Conjugative
121	AJ224743.1	-	-	-	-	-	-	-	-	Non-mobilizable
122	AJ293027.1	IncQ1	000196__Z74787_00004	MOBQ	NC_002636_00002	-	-	MOBQ	CP019954	Mobilizable
123	AJ297913.2	rep_cluster_236	001511__KJ850907_00001	MOBP	NC_010332_00013	MPF_T	NC_010332_00023,NC_010332_00022,NC_010332_00025,NC_010332_00028	-	-	Conjugative
124	AJ304453.1	-	-	-	-	-	-	-	-	Non-mobilizable
125	AJ311718.1	-	-	-	-	-	-	-	-	Non-mobilizable
126	AJ428837.1	-	-	-	-	-	-	-	-	Non-mobilizable
127	AJ431260.1	IncP	000180__NC_006830_00001	MOBP	NC_007353_00011	MPF_T	NC_006830_00008,NC_019318_00040,NC_007353_00043,NC_006830_00009	MOBP	NC_017965	Conjugative
128	AJ493278.1	rep_cluster_589	001996__NC_004528_00009	MOBV	NC_004528_00008	-	-	-	-	Mobilizable
129	AJ576039.1	-	-	MOBF	NC_005307_00072	-	-	-	-	Mobilizable
130	AJ577854.1	Inc13	000077__AJ577854_00009	MOBV	NC_005311_00009	-	-	-	-	Mobilizable
131	AJ577855.1	Inc13	000078__NC_005308_00008	MOBV	NC_005311_00009	-	-	-	-	Mobilizable
132	AJ579365.1	rep_cluster_282	001559__KC561137_00007	MOBV	NC_005076_00012	-	-	MOBV	NZ_CP009579	Mobilizable
133	AJ639924.1	IncP	000177__AB237782_00014	MOBP	NC_001735_00050	MPF_T	NC_004956_00085,NC_019318_00059,NC_008459_00022,NC_001735_00049	MOBP	NC_022371	Conjugative
134	AJ744860.1	IncP	000182__CP002151_00001	MOBP	NC_008357_00089	MPF_T	NC_008357_00035,NC_008357_00088,NC_019318_00059	MOB_unknown	NZ_HG941719	Conjugative
135	AJ748844.1	-	-	-	-	-	-	-	-	Non-mobilizable
136	AM157767.1	rep_cluster_717	002189__AM157767_00028	-	-	-	-	-	-	Non-mobilizable
137	AM167518.1	-	-	-	-	-	-	-	-	Non-mobilizable
138	AM183225.1	IncQ1,rep_cluster_723	000192__AM183225_00009,002196__AY862436_00007	-	-	-	-	-	-	Non-mobilizable
139	AM235768.1	rep_cluster_1081	000335__NC_009444_00070	-	-	MPF_I	NC_009444_00223,NC_009444_00213	-	-	Non-mobilizable
140	AM261282.1	IncP	000175__JQ004408_00022	MOBP	NC_019318_00039	MPF_T	NC_019318_00059,NC_019318_00057,NC_019318_00040,NC_019318_00058	MOBP	NC_017965	Conjugative
141	AM286416.1	IncFII,rep_cluster_645	000133__NC_008791_00085,002101__NC_004564_00056	-	-	-	-	-	-	Non-mobilizable
142	AM412318.1	-	-	MOBP	NC_009496_00008	-	-	-	-	Mobilizable
143	AM886293.1	IncFIB,IncFIA,IncFII,IncFIIA	000095__NZ_CP014273_00094,000094__NZ_CP015070_00117,000121__CP024805,000136__AP014877_00014	MOBF	NC_017627_00068	MPF_F	NC_014615_00033,NC_019094_00090,08-5333_00200,NC_013437_00116,NC_010719_00096,NC_018966_00040,NC_022651_00077,NC_017639_00094,NC_010488_00021,NC_007675_00027,NC_010409_00124,NC_017054_00096	-	-	Conjugative
144	AM901564.1	IncW	000213__AM901564_00031	MOBF	NC_010643_00013	MPF_T	NC_009982_00017,NC_009982_00012,NC_009982_00013,NC_010643_00022	MOBF	NC_001373	Conjugative
145	AY004211.1	rep_cluster_1135	000414__NC_002522_00006	-	-	-	-	-	-	Non-mobilizable
146	AY026767.1	Inc11	000050__NC_004930_00003	MOBV	NC_004930_00001	-	-	-	-	Mobilizable
147	AY027524.1	-	-	-	-	-	-	-	-	Non-mobilizable
148	AY033392.1	Inc11	000044__AY033392_00002	MOBV	NC_002140_00004	-	-	-	-	Mobilizable
149	AY033498.1	ColRNAI_rep_cluster_2005	000031__NC_003789	-	-	-	-	MOBP	KT693145	Mobilizable
150	AY033516.1	ColRNAI_rep_cluster_1857	000012__CP000801	-	-	-	-	-	-	Non-mobilizable
151	AY034092.1	rep_cluster_109	000342__AY034092_00034	MOBP	NC_004954_00022	MPF_T	NC_004954_00048	-	-	Conjugative
152	AY043298.1	IncQ2	000202__NC_003124_00010	MOBP	NC_003124_00014	-	-	-	-	Mobilizable
153	AY043299.1	IncQ2	000202__NC_003124_00010	MOBP	NC_003124_00014	-	-	-	-	Mobilizable
154	AY046276.1	IncN	000155__CP018649	MOBF	NC_015599_00019	MPF_T	NC_003292_00012,NC_008612_00190,NC_022375_00024,NC_007682_00039,NC_014368_00014,NC_007682_00044	MOBF	NZ_CP013027	Conjugative
155	AY048596.1	-	-	-	-	-	-	-	-	Non-mobilizable
156	AY048853.1	ColRNAI_rep_cluster_1857	000008__AJ627566	MOBP,MOBP	NC_017321_00002,NC_019076_00002	-	-	MOBP	CP010136	Mobilizable
157	AY056023.1	rep_cluster_578	001977__CP015271	MOBF	NC_005016_00005	-	-	-	-	Mobilizable
158	AY057845.1	-	-	-	-	-	-	-	-	Non-mobilizable
159	AY061891.1	-	-	-	-	-	-	-	-	Non-mobilizable
160	AY066026.1	rep_cluster_1351	000672__NC_015066_00002	MOBQ	NC_015066_00001	-	-	-	-	Mobilizable
161	AY079086.1	-	-	-	-	-	-	-	-	Non-mobilizable
162	AY079199.1	ColRNAI_rep_cluster_1291	000001__EU090225_00001	-	-	-	-	-	-	Non-mobilizable
163	AY082384.1	rep_cluster_1187	000471__NC_004532_00002	-	-	-	-	-	-	Non-mobilizable
164	AY096004.1	rep_cluster_689	002155__NC_001370_00001	-	-	-	-	-	-	Non-mobilizable
165	AY096005.1	-	-	-	-	-	-	-	-	Non-mobilizable
166	AY123045.1	rep_cluster_1099	000353__NC_004834_00001	-	-	-	-	-	-	Non-mobilizable
167	AY123046.1	-	-	-	-	-	-	MOBP	CP018941	Mobilizable
168	AY125331.1	-	-	-	-	-	-	-	-	Non-mobilizable
169	AY126018.1	rep_cluster_617	002066__NC_020243_00001	-	-	-	-	-	-	Non-mobilizable
170	AY150274.2	rep_cluster_384	001706__AY150274_00003	-	-	-	-	-	-	Non-mobilizable
171	AY167745.1	rep_cluster_1308	000626__NC_005325_00001	MOBP	NC_005325_00003	-	-	-	-	Mobilizable
172	AY172684.1	rep_cluster_207	001474__AY172684_00002	-	-	-	-	-	-	Non-mobilizable
173	AY172685.1	rep_cluster_314	001626__NC_004534_00007	-	-	-	-	-	-	Non-mobilizable
174	AY172687.1	rep_cluster_84	002321__AY172687_00015	MOBF	NC_013726_00011	-	-	-	-	Mobilizable
175	AY178757.1	rep_cluster_687	002151__AY178757	-	-	-	-	-	-	Non-mobilizable
176	AY188776.1	rep_cluster_1649	001048__NC_010078_00001	-	-	-	-	-	-	Non-mobilizable
177	AY210701.1	rep_cluster_1351	000669__NC_004252_00011	MOBQ	NC_002635_00004	-	-	-	-	Mobilizable
178	AY211023.1	rep_cluster_1910,rep_cluster_1879	001347__AP005645_00020,001314__CP003276_00049	MOBP	NC_004934_00104	-	-	-	-	Mobilizable
179	AY223810.1	-	-	-	-	-	-	-	-	Non-mobilizable
180	AY225511.1	rep_cluster_1921	001360__NC_004933_00006	-	-	-	-	-	-	Non-mobilizable
181	AY228335.1	-	-	MOBF	NC_017558_00016	MPF_T	NC_005240_00012,NC_017558_00032,NC_007506_00022,NC_005240_00010,NC_005240_00006	-	-	Conjugative
182	AY230134.1	Inc13	000075__NC_004932_00003	MOBV	NC_001858_00003	-	-	-	-	Mobilizable
183	AY232670.1	rep_cluster_1206	000496__AY232670_00006	MOBF	NC_019255_00001	-	-	-	-	Mobilizable
184	AY232671.1	IncP	000159__NC_003411_00007	-	-	-	-	-	-	Non-mobilizable
185	AY250830.1	rep_cluster_1188	000472__NC_004747_00002	-	-	-	-	-	-	Non-mobilizable
186	AY255829.1	rep_cluster_1099	000353__NC_004834_00001	-	-	-	-	-	-	Non-mobilizable
187	AY256846.1	rep_cluster_840	002322__NC_004997_00002	-	-	-	-	-	-	Non-mobilizable
188	AY258503.2	IncFIB,IncI1	000095__NZ_CP014273_00094,000145__HE610900_00001	MOBP	NC_013728_00087	MPF_I	NC_022992_00102,NC_022371_00084,NC_011754_00109,NC_007365_00033,NC_007365_00035,NC_011754_00087,NC_014843_00047,NC_012487_00131,NC_022992_00098	MOBP	FR821780	Conjugative
189	AY263990.1	-	-	-	-	-	-	-	-	Non-mobilizable
190	AY266269.1	-	-	MOBP	NC_004774_00025	-	-	-	-	Mobilizable
191	AY267368.1	rep_cluster_60	002035__AY267368_00001	-	-	-	-	-	-	Non-mobilizable
192	AY270152.1	rep_cluster_585	001992__AY270152	-	-	-	-	-	-	Non-mobilizable
193	AY271828.1	-	-	MOBP	NC_005910_00003	-	-	MOBP	CP018941	Mobilizable
194	AY271829.1	-	-	MOBP	NC_005910_00003	-	-	-	-	Mobilizable
195	AY277637.1	rep_cluster_1199	000487__NC_004811_00003	-	-	-	-	-	-	Non-mobilizable
196	AY297818.1	rep_cluster_1250	000559__NC_004900_00006	-	-	-	-	-	-	Non-mobilizable
197	AY300023.1	rep_cluster_1075	000323__AY300023_00001	-	-	-	-	-	-	Non-mobilizable
198	AY312234.1	rep_cluster_58	001985__AY312234_00001	-	-	-	-	-	-	Non-mobilizable
199	AY312235.1	rep_cluster_321	001632__CP000420_00003	-	-	-	-	-	-	Non-mobilizable
200	AY312585.1	rep_cluster_1317	000635__AY312585	-	-	-	-	-	-	Non-mobilizable
201	AY325804.1	rep_cluster_721	002194__NC_005242_00020	-	-	-	-	-	-	Non-mobilizable
202	AY333433.1	ColRNAI_rep_cluster_1857	000008__AJ627566	MOBF	CP019897	-	-	MOB_unknown	NZ_CP011607	Mobilizable
203	AY355285.1	rep_cluster_1078	000327__NC_005243	MOBP	NC_013306_00004	-	-	-	-	Mobilizable
204	AY357120.1	Inc18	000086__KY579372_00014	-	-	MPF_T	NC_013514_00028	-	-	Non-mobilizable
205	AY359464.1	-	-	MOBP	NC_010069_00004	-	-	-	-	Mobilizable
206	AY360321.1	ColRNAI_rep_cluster_1987	000019__CP000651_00005	-	-	-	-	MOBP	AJ001708	Mobilizable
207	AY362554.1	-	-	MOBP,MOBF	NC_010042_00002,NC_019255_00001	-	-	-	-	Mobilizable
208	AY365053.1	IncP	000179__NC_001735_00020	MOBP	NC_001735_00050	MPF_T	NC_019318_00059,NC_001735_00049,NC_004956_00085,NC_008459_00022	MOBP	NZ_CP009107	Conjugative
209	AY373761.1	rep_cluster_1017	000261__GQ900456	-	-	-	-	-	-	Non-mobilizable
210	AY378100.1	IncH,rep_cluster_1150,IncFIB	000137__CP017986_00041,000430__CP020850,000107__CP014778_00094	-	-	-	-	-	-	Non-mobilizable
211	AY386314.1	rep_cluster_415	001748__NC_005328_00017	-	-	-	-	-	-	Non-mobilizable
212	AY394560.1	rep_cluster_475	001828__CP007750	MOBP	NC_022355_00016	MPF_T	NC_022355_00040,NC_022355_00047,NC_006134_00038,NC_022355_00043	-	-	Conjugative
213	AY422214.1	IncL/M	000148__NC_021488_00028	MOBP	NC_004464_00056	MPF_I	NC_004464_00073,NC_004464_00068,NC_004464_00066,NC_005246_00057,NC_005246_00069,NC_019063_00094,NC_004464_00105,NC_019154_00069,NC_019344_00078	-	-	Conjugative
214	AY422215.1	IncP	000188__NC_013973_00002	-	-	MPF_T	NC_005247_00028,NC_005247_00022,NC_005247_00023,NC_005247_00018,NC_005247_00020	-	-	Non-mobilizable
215	AY422720.1	-	-	-	-	-	-	-	-	Non-mobilizable
216	AY423627.1	rep_cluster_423,rep_cluster_436	001758__AY423627,001777__AY423627	-	-	-	-	-	-	Non-mobilizable
217	AY423628.1	rep_cluster_423	001758__AY423627	-	-	-	-	-	-	Non-mobilizable
218	AY424310.1	ColRNAI_rep_cluster_1987	000019__CP000651_00005	-	-	-	-	MOBP	CP018941	Mobilizable
219	AY425961.1	Inc11	000038__AY425961_00002	-	-	-	-	-	-	Non-mobilizable
220	AY434675.1	-	-	-	-	-	-	-	-	Non-mobilizable
221	AY442931.2	rep_cluster_1775	001194__CP000632	MOBQ	NC_011994_00040	MPF_T	NC_006277_00023	-	-	Conjugative
222	AY458016.1	IncFIIA,IncFII	000136__AP014877_00014,000121__CP024805	MOBF	NC_017627_00068	MPF_F	NC_022651_00077,NC_018966_00040,NC_019094_00068,NC_013437_00116,NC_017054_00096,NC_007675_00027,NC_019094_00090,NC_010719_00097,NC_017639_00094,08-5333_00200,NC_008460_00107,NC_010409_00124	MOBP	AP014804	Conjugative
223	AY465897.1	-	-	-	-	-	-	-	-	Non-mobilizable
224	AY513488.1	rep_cluster_1094	000347__AY513488_00002	MOBP	NC_011414_00011	-	-	-	-	Mobilizable
225	AY517905.1	IncFII	000114__CP015527	MOBF	NC_007208_00043	MPF_F	NC_017054_00100,NC_017054_00096,NZ_CM001063_00039,NC_013437_00116,NC_017054_00095,NC_019112_00063,NC_014615_00033,NC_017054_00098,NZ_CM001154_00067	-	-	Conjugative
226	AY522431.4	rep_cluster_1254,IncN	000562__KT346360_00001,000155__CP018649	MOBF	NC_015599_00019	MPF_T	NC_014368_00014,NC_007682_00044,NC_022375_00024,NC_007682_00039,NC_003292_00012,NC_008612_00190	MOBF	NZ_CP013027	Conjugative
227	AY528560.1	-	-	-	-	-	-	-	-	Non-mobilizable
228	AY540995.2	rep_cluster_1431	000769__NC_005793_00062	MOBP	NC_005793_00073	MPF_T	NC_019378_00044	-	-	Conjugative
229	AY543071.1	ColRNAI_rep_cluster_1996	000026__AY543071	-	-	-	-	-	-	Non-mobilizable
230	AY543072.1	ColRNAI_rep_cluster_1990	000021__NC_011406	MOBV	NC_011406_00002	-	-	-	-	Mobilizable
231	AY546103.1	-	-	-	-	-	-	-	-	Non-mobilizable
232	AY572460.1	-	-	-	-	-	-	-	-	Non-mobilizable
233	AY584531.1	rep_cluster_146	000799__CP002337_00001	MOBP	NC_005917_00008	-	-	-	-	Mobilizable
234	AY589570.1	ColRNAI_rep_cluster_1987	000019__CP000651_00005	-	-	-	-	-	-	Non-mobilizable
235	AY589571.1	ColRNAI_rep_cluster_1987	000019__CP000651_00005	MOBP,MOBP	NC_013090_00004,NC_001848_00006	-	-	MOBP	CP008720	Mobilizable
236	AY603979.1	rep_cluster_283	001574__NC_005918_00001	MOBP	NC_005205_00082	MPF_T	NC_005918_00041,NC_019328_00069,NC_019266_00028,NC_007275_00033,NC_007275_00028	MOBQ	AJ550509	Conjugative
237	AY603980.1	rep_cluster_283	001563__AY603980_00001	MOBP	NC_005919_00037	-	-	-	-	Mobilizable
238	AY603981.1	-	-	MOBV	NC_005920_00003	-	-	-	-	Mobilizable
239	AY603982.1	rep_cluster_1556	000924__AY603982_00001	MOBP	NC_005921_00007	MPF_T	NC_005921_00006	-	-	Conjugative
240	AY603983.1	-	-	MOBV	NC_005922_00002	-	-	-	-	Mobilizable
241	AY608912.1	IncX2	000219__NC_005923_00001	-	-	-	-	MOBP,MOBP	CP022251,NC_010643	Mobilizable
242	AY639886.1	ColRNAI_rep_cluster_1987	000019__CP000651_00005	MOBP	NC_016903_00002	-	-	MOBP	CP008720	Mobilizable
243	AY641454.1	-	-	-	-	-	-	-	-	Non-mobilizable
244	AY647243.1	rep_cluster_974	002458__NC_007206_00012	MOBP	NC_004058_00030	MPF_T	NC_007206_00020,NC_007206_00022,NC_004058_00024,NC_004058_00017,NC_007206_00021	-	-	Conjugative
245	AY648696.1	rep_cluster_1953	001398__CP012010	-	-	-	-	-	-	Non-mobilizable
246	AY737645.1	rep_cluster_928	002415__NC_006822_00001	-	-	-	-	-	-	Non-mobilizable
247	AY780631.1	rep_cluster_1061	000305__NC_010872_00007	-	-	-	-	-	-	Non-mobilizable
248	AY780632.1	rep_cluster_1061	000305__NC_010872_00007	MOBP	NZ_CM002269_00016	MPF_T	NC_010876_00027,NC_010876_00023	-	-	Conjugative
249	AY780633.1	-	-	-	-	-	-	-	-	Non-mobilizable
250	AY789019.1	-	-	-	-	-	-	-	-	Non-mobilizable
251	AY790924.1	rep_cluster_928	002415__NC_006822_00001	-	-	-	-	-	-	Non-mobilizable
252	AY836798.1	Inc13	000077__AJ577854_00009	MOBV,MOBV	NZ_AKYF01000029_00006,NZ_ANIP01000001_00004	-	-	-	-	Mobilizable
253	AY849557.2	rep_cluster_1699	001107__JN225497_00005	MOBP,MOB_Unknown	NC_019377_00008,JQ821353	-	-	-	-	Mobilizable
254	AY855841.2	rep_cluster_1027	000276__CP002493_00001	MOBP	NC_006827_00032	MPF_T	NC_006827_00028,NC_004671_00018	-	-	Conjugative
255	AY858987.1	rep_cluster_874	002354__AY858987_00013	-	-	-	-	-	-	Non-mobilizable
256	AY860110.1	-	-	-	-	-	-	-	-	Non-mobilizable
257	AY862435.1	-	-	MOBF,MOBP	NC_019255_00001,NC_010042_00002	-	-	-	-	Mobilizable
258	AY862436.1	rep_cluster_723	002196__AY862436_00007	-	-	-	-	-	-	Non-mobilizable
259	AY876057.1	-	-	-	-	-	-	-	-	Non-mobilizable
260	AY879342.1	IncFIIA,IncFII	000136__AP014877_00014,000121__CP024805	MOBF	NC_017627_00068	-	-	-	-	Mobilizable
261	AY887963.3	rep_cluster_1907	001342__AF491307	MOBF	NC_012674_00085	MPF_T	NC_007926_00094,NC_007926_00095,NC_007926_00034,NC_004999_00101,NC_007926_00096	-	-	Conjugative
262	AY913943.1	ColRNAI_rep_cluster_1857	000008__AJ627566	MOBF	CP019897	-	-	MOB_unknown	CP010128	Mobilizable
263	AY929248.1	ColRNAI_rep_cluster_1857	000008__AJ627566	MOBP	NC_023328_00003	-	-	MOBP	NC_003457	Mobilizable
264	AY941098.1	-	-	MOBQ	NC_006907_00020	-	-	-	-	Mobilizable
265	AY943952.1	rep_cluster_2030	001462__AY943952_00035	MOBF	NC_006911_00006	-	-	-	-	Mobilizable
266	AY943953.1	-	-	MOBF	NC_006912_00002	-	-	-	-	Mobilizable
267	AY948116.1	rep_cluster_916	002401__AY948116_00003	-	-	-	-	-	-	Non-mobilizable
268	AY948117.1	-	-	-	-	-	-	-	-	Non-mobilizable
269	AY951984.1	rep_cluster_836	002315__AY951984	-	-	-	-	-	-	Non-mobilizable
270	AY951985.1	-	-	-	-	-	-	-	-	Non-mobilizable
271	AY995189.1	rep_cluster_1855	001285__NC_010260_00002	-	-	-	-	-	-	Non-mobilizable
272	BK008853.1	rep_cluster_208	001475__EF495198_00004	MOBQ	NC_009476_00025	MPF_T	NC_009476_00028	-	-	Conjugative
273	CP000037.1	IncFII,IncFIIA	000121__CP024805,000136__AP014877_00014	MOBF,MOBP	NC_017627_00068,NC_011416_00039	-	-	-	-	Mobilizable
274	CP000039.1	IncFII,IncFIIA	000121__CP024805,000136__AP014877_00014	MOBP,MOBF	NC_011416_00039,NC_017627_00068	MPF_Unknown	08-5333_00200	-	-	Conjugative
275	CP000047.1	rep_cluster_163	001020__CP010087_00059	MOBP	NC_006578_00090	MPF_T	NC_018686_00120,NC_006578_00007	-	-	Conjugative
276	CP000059.1	rep_cluster_283	001578__CP000059_00001	MOBP	NC_019265_00015	MPF_T	NC_007274_00167,NC_007274_00169	-	-	Conjugative
277	CP000160.1	rep_cluster_993	002474__CP000160_00001	-	-	-	-	-	-	Non-mobilizable
278	CP000443.1	IncP	000179__NC_001735_00020	MOBP	NC_001735_00050	MPF_T	NC_008459_00022,NC_007353_00043,NC_004956_00085,NC_001735_00049	MOBP	KU302802	Conjugative
279	CP000476.1	rep_cluster_884	002362__CP000476_00145	MOBP	NC_008713_00079	MPF_T	NC_008539_00051	-	-	Conjugative
280	CP000522.1	rep_cluster_1919	001359__CP000522_00002	-	-	-	-	-	-	Non-mobilizable
281	CP000523.1	rep_cluster_1172	000454__KY202458_00008	-	-	-	-	-	-	Non-mobilizable
282	CP000602.1	IncA/C2	000092__CP025470	MOBH	NC_012885_00072	MPF_F	NC_023291_00077,NC_014170_00023,NC_009140_00071,NC_012885_00091,NC_012885_00088,NC_012885_00083,NC_016974_00085,NC_012885_00167	-	-	Conjugative
283	CP000603.1	IncA/C2	000092__CP025470	MOBH	NC_012885_00072	MPF_F	NC_012885_00088,NC_023291_00077,NC_009140_00071,NC_014170_00023,NC_012885_00091,NC_008612_00190,NC_012885_00167,NC_016974_00085,NC_012885_00083	-	-	Conjugative
284	CP000617.1	rep_cluster_219	001488__NC_016591	MOBF	NC_016591_00351	MPF_F	NC_016591_00346,NC_016591_00359,NC_016591_00312,NC_016591_00355,NC_016591_00313,NC_016591_00372,NC_016591_00352,NC_016591_00345,NC_016591_00353,NC_016591_00351,NC_016591_00350	-	-	Conjugative
285	CP000618.1	-	-	-	-	MPF_T	NC_015383_00077,NC_015383_00006,NC_015383_00072	-	-	Non-mobilizable
286	CP000619.1	rep_cluster_460	001809__CP000619_00074	-	-	-	-	-	-	Non-mobilizable
287	CP000620.1	rep_cluster_1289	000607__CP000620_00033	-	-	-	-	-	-	Non-mobilizable
288	CP000621.1	-	-	-	-	-	-	-	-	Non-mobilizable
289	CP000641.1	ColRNAI_rep_cluster_1987	000019__CP000651_00005	-	-	-	-	MOBP	AJ001708	Mobilizable
290	CP000642.1	ColRNAI_rep_cluster_1857	000008__AJ627566	MOBF	CP019897	-	-	MOB_unknown	NC_003079	Mobilizable
291	CP000643.1	Inc13	000058__CP000643_00001	-	-	-	-	-	-	Non-mobilizable
292	CP000755.1	rep_cluster_1488	000827__CP000755_00011	MOBC	NC_010112_00030	MPF_T	NC_010112_00005,NC_010112_00063	-	-	Conjugative
293	CP000756.1	rep_cluster_1599	000973__CP000756_00011	-	-	-	-	-	-	Non-mobilizable
294	CP000757.1	rep_cluster_1874	001310__NC_010114_00016	-	-	-	-	-	-	Non-mobilizable
295	CP000818.1	rep_cluster_405	001727__CP000818_00191	-	-	-	-	-	-	Non-mobilizable
296	CP000836.1	IncFIB,IncFIIA,IncFII	000095__NZ_CP014273_00094,000136__AP014877_00014,000121__CP024805	MOBF	NC_011980_00044	MPF_F	NC_022651_00077,NC_010409_00124	MOBF	FN868248	Conjugative
297	CP000876.1	-	-	-	-	-	-	-	-	Non-mobilizable
298	CP000877.1	rep_cluster_161	000993__CP000877_00051	-	-	-	-	-	-	Non-mobilizable
299	CP001028.1	rep_cluster_526	001901__CP001028_00076	MOBP	NC_010553_00087	MPF_T	NC_010553_00001,NC_010553_00005,NC_010553_00071	-	-	Conjugative
300	CP001058.1	Inc13	000058__CP000643_00001	-	-	-	-	-	-	Non-mobilizable
301	CP001059.1	IncX4	000224__NC_022105_00002	MOBP	NC_013718_00057	MPF_T	NC_013718_00041,NC_013718_00045,NC_021079_00038,NC_013718_00044	-	-	Conjugative
302	CP001060.1	ColRNAI_rep_cluster_1291	000001__EU090225_00001	MOBQ	NC_013719_00001	-	-	-	-	Mobilizable
303	CP001061.1	ColRNAI_rep_cluster_1857	000008__AJ627566	MOBP	NC_020251_00005	-	-	MOBP	NZ_CP012931	Mobilizable
304	CP001062.1	IncFIIA,IncFII	000136__AP014877_00014,000121__CP024805	MOBF,MOBP	NC_017627_00068,NC_011416_00039	MPF_Unknown	08-5333_00200	-	-	Conjugative
305	CP001162.1	IncFIIA,IncFIB,IncFII	000136__AP014877_00014,000096__NC_019117_00097,000121__CP024805	MOBF	NC_017627_00068	MPF_F	NC_013437_00116,NC_022651_00077,NC_007675_00027,NC_017639_00094,NC_010488_00021,NC_017054_00096,NC_014615_00033,NC_018966_00040,NC_010409_00124,NC_019094_00090,08-5333_00200,NC_008460_00107	-	-	Conjugative
306	CP001166.1	rep_cluster_125	000558__CP013279	-	-	-	-	-	-	Non-mobilizable
307	CP001167.1	rep_cluster_1909	001345__CP001167	MOBV	NC_007104_00003	-	-	-	-	Mobilizable
308	CP001168.1	rep_cluster_1832	001257__CP001168	MOBV	NC_016780_00010	-	-	-	-	Mobilizable
309	CP001169.1	rep_cluster_198	001420__CP001169_00004	MOBP	NC_011342_00007	MPF_T	NC_011342_00012	-	-	Conjugative
310	CP001170.1	rep_cluster_484	001843__CP001170	MOBQ	NC_011337_00008	-	-	-	-	Mobilizable
311	CP001171.1	rep_cluster_1950	001395__CP003751	MOBV	NC_011657_00002	-	-	-	-	Mobilizable
312	CP001384.1	IncFII,IncFIIA	000121__CP024805,000136__AP014877_00014	MOBF	NC_011980_00044	-	-	-	-	Mobilizable
313	CP001385.1	ColRNAI_rep_cluster_1987	000019__CP000651_00005	-	-	-	-	-	-	Non-mobilizable
314	CP001386.1	ColRNAI_rep_cluster_1987	000019__CP000651_00005	-	-	-	-	MOBP	AJ001708	Mobilizable
315	CP001387.1	ColRNAI_rep_cluster_1857	000008__AJ627566	MOBP	NC_020251_00005	-	-	MOBP	NC_008697	Mobilizable
316	CP001388.1	ColRNAI_rep_cluster_1987	000019__CP000651_00005	-	-	-	-	MOBP,MOB_unknown	NC_023324,NC_019986	Mobilizable
317	CP001516.1	rep_cluster_1621	001009__CP001516_00040	-	-	-	-	-	-	Non-mobilizable
318	CP001517.1	-	-	-	-	-	-	-	-	Non-mobilizable
319	CP001518.1	-	-	-	-	-	-	-	-	Non-mobilizable
320	CP001522.1	-	-	-	-	-	-	-	-	Non-mobilizable
321	CP001524.1	-	-	-	-	-	-	-	-	Non-mobilizable
322	CP001653.1	-	-	-	-	-	-	-	-	Non-mobilizable
323	CP001659.1	rep_cluster_873	002353__NC_012219_00060	-	-	-	-	-	-	Non-mobilizable
324	CP001660.1	-	-	-	-	-	-	-	-	Non-mobilizable
325	CP001770.1	rep_cluster_1111	000372__CP001770_00019	-	-	-	-	-	-	Non-mobilizable
326	CP001771.1	-	-	-	-	-	-	-	-	Non-mobilizable
327	CP001772.1	-	-	-	-	-	-	-	-	Non-mobilizable
328	CP001773.1	rep_cluster_1103	000361__CP001773_00001	-	-	-	-	-	-	Non-mobilizable
329	CP001774.1	-	-	-	-	-	-	-	-	Non-mobilizable
330	CP001775.1	rep_cluster_1144	000423__CP001775_00009	-	-	-	-	-	-	Non-mobilizable
331	CP001776.1	-	-	-	-	-	-	-	-	Non-mobilizable
332	CP001777.1	rep_cluster_1274	000588__CP001777_00005	-	-	-	-	-	-	Non-mobilizable
333	CP001881.1	-	-	-	-	-	-	-	-	Non-mobilizable
334	CP001882.1	-	-	-	-	-	-	-	-	Non-mobilizable
335	CP001884.1	-	-	-	-	-	-	-	-	Non-mobilizable
336	CP001885.1	-	-	-	-	-	-	-	-	Non-mobilizable
337	CP002030.1	-	-	MOBP	NC_022355_00016	MPF_T	NC_006135_00040,NC_022355_00040,NC_022355_00043	-	-	Conjugative
338	CP002035.1	rep_cluster_707	002176__NZ_AVAB01000114_00021	MOBQ	NC_006377_00033	-	-	-	-	Mobilizable
339	CP002036.1	rep_cluster_707	002175__NC_017468_00016	MOBQ	NC_017480_00003	-	-	-	-	Mobilizable
340	CP002037.1	rep_cluster_1685	001087__CP011404_00139	MOBP	NZ_AICL01000008_00086	-	-	-	-	Mobilizable
341	CP002089.1	IncFIIA,IncFIB,IncFII	000136__AP014877_00014,000095__NZ_CP014273_00094,000121__CP024805	MOBF,MOBP	NC_017627_00068,NC_011416_00039	MPF_F	NC_010409_00124,NC_008460_00107,NC_017639_00094,NC_018966_00040,NC_017054_00096,NC_014615_00033,NC_007675_00027,NC_019094_00090,NC_013437_00116,08-5333_00200,NC_010488_00021,NC_022651_00077	MOBF	CP016042	Conjugative
342	CP002090.1	IncFIIA,IncFII,IncFIB	000136__AP014877_00014,000121__CP024805,000095__NZ_CP014273_00094	MOBP,MOBF	NC_011416_00039,NC_017627_00068	MPF_F	NC_017639_00094,NC_008460_00107,NC_018966_00040,NC_013437_00116,NC_010488_00021,NC_022651_00077,NC_014615_00033,NC_007675_00027,NC_017054_00096,08-5333_00200,NC_019094_00090,NC_010409_00124	MOBF	CP016042	Conjugative
343	CP002119.1	rep_cluster_994	002475__NC_001988_00176	-	-	-	-	-	-	Non-mobilizable
344	CP002135.1	rep_cluster_1733,rep_cluster_1017	001150__NC_013330_00017,000261__GQ900456	-	-	-	-	MOBQ	AF001314	Mobilizable
345	CP002143.1	rep_cluster_1017,rep_cluster_1733	000261__GQ900456,001150__NC_013330_00017	-	-	-	-	MOBQ	AF001314	Mobilizable
346	CP002145.1	rep_cluster_936	002421__GU237136_00023	MOBQ	NC_013653_00017	MPF_T	NC_010279_00007	-	-	Conjugative
347	CP002148.1	rep_cluster_1947	001391__NC_019143_00002	-	-	-	-	-	-	Non-mobilizable
348	CP002149.1	rep_cluster_1017,rep_cluster_1733	000261__GQ900456,001150__NC_013330_00017	-	-	-	-	MOBQ	AF001314	Mobilizable
349	CP002151.1	IncP	000182__CP002151_00001	MOBP	NC_008357_00089	MPF_T	NC_008357_00035,NC_019318_00059,NC_008357_00088	MOB_unknown	NZ_HG941719	Conjugative
350	CP002152.1	IncP	000182__CP002151_00001	MOBP	NC_008357_00089	MPF_T	NC_008357_00035,NC_019318_00059,NC_008357_00088	MOB_unknown	NZ_HG941719	Conjugative
351	CP002153.1	IncP	000182__CP002151_00001	MOBP	NC_008357_00089	MPF_T	NC_008357_00035,NC_019318_00059,NC_008357_00088	MOB_unknown	NZ_HG941719	Conjugative
352	CP002178.1	rep_cluster_163,rep_cluster_757	001020__CP010087_00059,002235__CP010006	-	-	-	-	-	-	Non-mobilizable
353	CP002179.1	IncX7	000228__CP002179_00041	MOBP	NC_015054_00008	MPF_T	NC_015054_00018,NC_015054_00015,NC_015054_00019,NC_015054_00022	-	-	Conjugative
354	CP002180.1	ColRNAI_rep_cluster_1857	000008__AJ627566	-	-	-	-	MOBP	NC_017657	Mobilizable
355	CP002181.1	rep_cluster_1297	000614__NZ_CP009994_00039	MOBP	NC_015068_00028	MPF_T	NC_015068_00015,NC_015068_00010,NC_015068_00011,NC_015068_00012,NC_015068_00008	-	-	Conjugative
356	CP002182.1	IncFII,rep_cluster_645	000122__JQ418538,002101__NC_004564_00056	MOBF	NC_010157_00072	-	-	-	-	Mobilizable
357	CP002208.2	rep_cluster_183,rep_cluster_570	001252__NC_010980_00001,001972__KC954773_00009	-	-	-	-	-	-	Non-mobilizable
358	CP002253.1	-	-	-	-	-	-	-	-	Non-mobilizable
359	CP002254.1	-	-	-	-	-	-	-	-	Non-mobilizable
360	CP002255.1	rep_cluster_1621	001010__NC_018979_00032	-	-	-	-	-	-	Non-mobilizable
361	CP002256.1	-	-	-	-	-	-	-	-	Non-mobilizable
362	CP002257.1	-	-	-	-	-	-	-	-	Non-mobilizable
363	CP002258.1	-	-	-	-	-	-	-	-	Non-mobilizable
364	CP002259.1	-	-	-	-	-	-	-	-	Non-mobilizable
365	CP002260.1	-	-	-	-	-	-	-	-	Non-mobilizable
366	CP002261.1	rep_cluster_1662	001063__CP001303_00032	-	-	-	-	-	-	Non-mobilizable
367	CP002262.1	-	-	-	-	-	-	-	-	Non-mobilizable
368	CP002263.1	-	-	-	-	-	-	-	-	Non-mobilizable
369	CP002264.1	-	-	-	-	-	-	-	-	Non-mobilizable
370	CP002265.1	-	-	-	-	-	-	-	-	Non-mobilizable
371	CP002266.1	-	-	-	-	-	-	-	-	Non-mobilizable
372	CP002267.1	-	-	-	-	-	-	-	-	Non-mobilizable
373	CP002268.1	-	-	-	-	-	-	-	-	Non-mobilizable
374	CP002269.1	-	-	-	-	-	-	-	-	Non-mobilizable
375	CP002270.1	-	-	-	-	-	-	-	-	Non-mobilizable
376	CP002441.1	rep_cluster_1410	000752__CP002441_00035	MOBP	NC_014105_00043	MPF_T	NC_014105_00026,NC_014105_00044,NC_014105_00024	-	-	Conjugative
377	CP002473.1	ColRNAI_rep_cluster_1987	000019__CP000651_00005	MOBP	NC_016979_00005	-	-	MOBP	NZ_CP011140	Mobilizable
378	CP002474.1	IncFII,IncFIB,IncFII	000128__CP023916,000107__CP014778_00094,000113__CP022035	MOBF	NC_021231_00058	MPF_F	NC_022609_00081,NC_021502_00131,NC_014312_00141,NC_023332_00154,NC_014312_00118,NC_014312_00128,NC_019389_00080,NC_014312_00116,NC_019389_00068,NC_019165_00034,NC_021654_00016,NC_021502_00150	-	-	Conjugative
379	CP002523.1	rep_cluster_1172	000454__KY202458_00008	-	-	-	-	-	-	Non-mobilizable
380	CP002524.1	rep_cluster_734	002211__NC_010606_00001	MOBF	NC_017163_00021	MPF_F	NC_010606_00071,NC_017163_00053,NC_010606_00079,NC_010606_00075,NC_010606_00072,NC_010606_00078,NZ_AEOY01000095_00077,NC_010606_00076,NC_017163_00020,NC_010606_00080,NC_017163_00052	-	-	Conjugative
381	CP002642.1	rep_cluster_81	002294__CP015013	-	-	MPF_F	NC_015462_00004	-	-	Non-mobilizable
382	CP002962.1	-	-	MOBP	NC_018742_00141	MPF_T	NC_018742_00154,NC_018742_00003	-	-	Conjugative
383	CP002963.1	-	-	-	-	-	-	-	-	Non-mobilizable
384	CP002964.1	rep_cluster_1180	000463__CP002964_00029	-	-	-	-	-	-	Non-mobilizable
385	CP002965.1	-	-	-	-	-	-	-	-	Non-mobilizable
386	CP002966.1	rep_cluster_1212	000503__CP002966_00008	-	-	-	-	-	-	Non-mobilizable
387	CP002969.1	ColRNAI_rep_cluster_1987	000019__CP000651_00005	MOBP	NC_016903_00002	-	-	MOBP	CP008720	Mobilizable
388	CP003180.1	-	-	-	-	-	-	-	-	Non-mobilizable
389	CP003185.1	rep_cluster_770	002250__CP003067_00077	-	-	MPF_T	NC_019956_00093	-	-	Non-mobilizable
390	CP003420.1	-	-	-	-	MPF_T	NC_017919_00021,NC_017919_00024	-	-	Non-mobilizable
391	CP003505.2	IncP	000179__NC_001735_00020	MOBP	NC_001735_00050	MPF_T	NC_001735_00049,NC_008459_00022,NC_019318_00059,NC_004956_00085	MOBP	NZ_CP009107	Conjugative
392	CP003584.1	rep_cluster_1018,rep_cluster_185	000268__U32369_00002,001274__DQ198088_00024	MOBV	NC_022618_00010	-	-	-	-	Mobilizable
393	CP003585.1	rep_cluster_183,rep_cluster_889	001252__NC_010980_00001,002366__KY595966_00031	MOBP	NC_019240_00008	-	-	-	-	Mobilizable
394	CP003586.1	rep_cluster_893	002374__CP004064_00076	MOBP	NC_021995_00038	MPF_T	NC_020208_00096	-	-	Conjugative
395	CP003812.1	rep_cluster_1631	001029__NC_018640_00007	-	-	-	-	-	-	Non-mobilizable
396	CP003817.1	rep_cluster_1631	001029__NC_018640_00007	-	-	-	-	-	-	Non-mobilizable
397	CP003921.1	-	-	-	-	-	-	-	-	Non-mobilizable
398	CP003975.1	rep_cluster_1433	000773__NC_022243_00001	-	-	-	-	-	-	Non-mobilizable
399	CP003983.1	-	-	-	-	-	-	-	-	Non-mobilizable
400	CP004366.2	IncN	000155__CP018649	MOBF	NC_015599_00019	MPF_T	NC_014368_00014,NC_011617_00041,NC_022375_00024,NC_009131_00030,NC_007682_00044,NC_008612_00190	MOBF	NZ_CP015914	Conjugative
401	CP004367.2	IncN	000155__CP018649	MOBF	NC_015599_00019	MPF_T	NC_008612_00190,NC_022375_00024,NC_009131_00030,NC_014368_00014,NC_011617_00041,NC_007682_00044	MOBF	NZ_CP015914	Conjugative
402	CP004847.1	rep_cluster_1331	000650__CP004847_00158	-	-	-	-	-	-	Non-mobilizable
403	CP004850.1	rep_cluster_1371	000701__NC_021718_00105	MOBP	NC_019394_00118	MPF_I	NC_019394_00098,NC_019394_00096,NC_019394_00097,NC_019394_00086,NC_019394_00072	-	-	Conjugative
404	CP004861.1	rep_cluster_1721,rep_cluster_125	001137__CP004861,000558__CP013279	-	-	MPF_T	NC_017203_00099,NC_018501_00133	-	-	Non-mobilizable
405	CP004866.1	rep_cluster_268	001545__CP007609	MOBP	NC_020243_00005	-	-	-	-	Mobilizable
406	CP004867.1	rep_cluster_617	002066__NC_020243_00001	MOBP	NC_020243_00005	-	-	-	-	Mobilizable
407	CP005289.1	rep_cluster_1230	000530__NC_010626_00002	-	-	-	-	-	-	Non-mobilizable
408	CP005978.1	rep_cluster_1058	000300__NC_008499_00039	-	-	-	-	-	-	Non-mobilizable
409	CP005979.1	rep_cluster_878,rep_cluster_1255	002357__CP017375,000565__CP002462_00034	MOBP,MOBQ	NC_015979_00031,NC_005952_00012	-	-	-	-	Mobilizable
410	CP005980.1	rep_cluster_172	001134__CP003145_00001	MOBQ	NC_015603_00001	-	-	-	-	Mobilizable
411	CP005981.1	rep_cluster_731,rep_cluster_707,rep_cluster_1675	002206__JX416329_00023,002182__CP018327,001076__CP016798	MOBQ	NC_011352_00007	-	-	-	-	Mobilizable
412	CP005982.1	rep_cluster_1255	000565__CP002462_00034	-	-	-	-	-	-	Non-mobilizable
413	CP005983.1	rep_cluster_1299	000616__NC_019233_00001	-	-	-	-	-	-	Non-mobilizable
414	CP005984.1	rep_cluster_689	002154__CP003139_00001	-	-	-	-	-	-	Non-mobilizable
415	CP005999.1	IncI1	000144__CP015838_00058	MOBP	NC_013728_00087	MPF_I	NC_019097_00085,NC_022992_00098,NC_014843_00041,NC_011754_00087,NC_022371_00084,NC_014843_00047,NC_012487_00131,NC_011754_00109,NC_007365_00035	MOBP	FR821780	Conjugative
416	CP006000.1	IncFIB	000095__NZ_CP014273_00094	MOBP	NC_011416_00039	MPF_F	NC_022651_00077,NC_010409_00124	-	-	Conjugative
417	CP006001.1	IncFII,IncFIIA	000121__CP024805,000136__AP014877_00014	MOBF	NC_017627_00068	MPF_F	NC_010719_00096,NC_013437_00116,NC_010409_00124,NC_010719_00097,NC_019037_00027,NC_017054_00096,NC_022651_00077,NC_017639_00094,08-5333_00200,NC_010488_00021,NC_007675_00027	MOBF	AP014877	Conjugative
418	CP006002.1	IncFII,IncFIIA	000121__CP024805,000136__AP014877_00014	MOBP,MOBP	NC_011416_00039,NC_019097	-	-	MOBP	NC_010719	Mobilizable
419	CP006737.1	IncFII,IncFIIA	000121__CP024805,000136__AP014877_00014	MOBF	NC_017627_00068	MPF_T	NC_007607_00115	-	-	Conjugative
420	CP007038.1	IncFII,IncFIIA	000121__CP024805,000136__AP014877_00014	MOBF	NC_011980_00044	-	-	-	-	Mobilizable
421	CP007150.1	IncFII,IncFIIA,IncFIB,ColRNAI_rep_cluster_1291	000121__CP024805,000136__AP014877_00014,000096__NC_019117_00097,000002__NC_009781	MOBF	NC_017627_00068	MPF_F	NC_008460_00107,NC_019072_00073,NC_007675_00027,NC_022651_00077,NC_013437_00116,NC_018966_00040,NC_010409_00124,NC_019094_00068,NC_019094_00090,NC_017630_00031,NC_010719_00097,NC_017054_00096	MOBF	NC_017508	Conjugative
422	CP007182.1	rep_cluster_475	001827__CP007752	MOBP	NC_022355_00016	MPF_T	NC_022355_00047,NC_022355_00043,NC_006135_00040,NC_022355_00040	-	-	Conjugative
423	CP007550.1	rep_cluster_1172	000454__KY202458_00008	-	-	-	-	-	-	Non-mobilizable
424	CP007578.1	rep_cluster_1172	000454__KY202458_00008	-	-	-	-	-	-	Non-mobilizable
425	CP007579.1	rep_cluster_1254	000562__KT346360_00001	-	-	-	-	-	-	Non-mobilizable
426	CP007580.1	rep_cluster_734	002211__NC_010606_00001	MOBF	NC_017163_00021	MPF_F	NC_010606_00080,NC_017163_00020,NC_010606_00079,NC_010606_00075,NC_017163_00052,NC_010606_00071,NC_010606_00072,NC_017163_00053,NZ_AEOY01000095_00077,NC_010606_00078,NC_010606_00076	-	-	Conjugative
427	CP007608.1	-	-	-	-	-	-	-	-	Non-mobilizable
428	CP007609.1	rep_cluster_268	001545__CP007609	MOBP	NC_020243_00005	-	-	-	-	Mobilizable
429	CP007615.1	rep_cluster_1721,rep_cluster_125	001137__CP004861,000558__CP013279	-	-	MPF_unknown	NC_018501_00133,NC_017203_00099	-	-	Non-mobilizable
430	CP007745.1	rep_cluster_1398	000734__CP013426_00028	-	-	MPF_T	NC_015383_00006	-	-	Non-mobilizable
431	CP007752.1	rep_cluster_475	001827__CP007752	MOBP	NC_022355_00016	MPF_T	NC_006135_00040,NC_022355_00043,NC_007141_00026,NC_022355_00047	-	-	Conjugative
432	CP008701.1	IncFII,IncR,IncFII,IncFIB	000113__CP022035,000204__CP008701_00115,000130__CP023489,000107__CP014778_00094	MOBF	NC_021231_00058	MPF_F	NC_021654_00016,NC_019155_00032,NC_014312_00118,NC_014312_00128,NC_014312_00116,NC_019165_00034,NC_019389_00080,NC_022609_00081,NC_023332_00154,NC_021502_00150,NC_021231_00085,NC_021502_00131	-	-	Conjugative
433	CP008733.1	IncI1	000145__HE610900_00001	MOBP	NC_019097	MPF_I	NC_015965_00072,NC_019097_00056,NC_019111_00038,NZ_CM001473_00069,NC_019097_00075,NC_023290_00086,NC_022267_00057,NC_022267_00069,NC_019097_00085	MOBP	HM021326	Conjugative
434	CP008734.1	IncI1	000145__HE610900_00001	MOBP	NC_019097	MPF_I	NC_023290_00086,NC_022267_00057,NC_019097_00075,NC_019111_00038,NC_019097_00085,NC_019097_00056,NC_015965_00072,NC_022267_00069,NZ_CM001473_00069	MOBP	JN253636	Conjugative
435	CP008735.1	IncI1	000145__HE610900_00001	MOBP	NC_019097	MPF_I	NC_022267_00069,NC_023290_00086,NZ_CM001473_00069,NC_019111_00038,NC_019097_00075,NC_019097_00056,NC_022267_00057,NC_015965_00072,NC_019097_00085	MOBP	HM021326	Conjugative
436	CP008736.1	IncI1	000145__HE610900_00001	MOBP	NC_019097	MPF_I	NC_019097_00056,NC_019097_00075,NZ_CM001473_00069,NC_022267_00069,NC_019111_00038,NC_023290_00086,NC_022267_00057,NC_019097_00085,NC_015965_00072	MOBP	HM021326	Conjugative
437	CP008737.1	IncI1	000145__HE610900_00001	MOBP	NC_019097	MPF_I	NC_019097_00075,NC_019111_00038,NC_023290_00086,NC_019097_00085,NC_022267_00069,NC_019097_00056,NC_015965_00072,NZ_CM001473_00069	MOBP	HM021326	Conjugative
438	CP008738.1	IncI1	000145__HE610900_00001	-	-	MPF_I	NC_019111_00038,NC_019097_00056,NC_023290_00086,NC_022267_00057,NC_019097_00085	MOBP	HM021326	Mobilizable
439	CP008904.1	rep_cluster_349	001664__CP006255_00026	-	-	-	-	-	-	Non-mobilizable
440	CP008937.1	rep_cluster_223	001491__CP008939_00060	-	-	-	-	-	-	Non-mobilizable
441	CP008938.1	rep_cluster_1687	001089__CP008938_00012	-	-	-	-	-	-	Non-mobilizable
442	CP008939.1	rep_cluster_223	001491__CP008939_00060	-	-	-	-	-	-	Non-mobilizable
443	CP008940.1	rep_cluster_223	001491__CP008939_00060	-	-	-	-	-	-	Non-mobilizable
444	CP008952.1	-	-	-	-	-	-	-	-	Non-mobilizable
445	CP009051.1	IncY	000230__CP009168_00001	-	-	-	-	-	-	Non-mobilizable
446	CP009052.1	IncI1	000144__CP015838_00058	MOBP	NC_013728_00087	MPF_I	NC_014843_00041,NC_012487_00131,NC_011754_00087,NC_014843_00047,NC_022992_00098,NC_014843_00033,NC_007365_00035,NC_011754_00109,NC_022371_00084	MOBP	CP018984	Conjugative
447	CP009053.1	IncI1,IncFII,IncFIB	000144__CP015838_00058,000121__CP024805,000095__NZ_CP014273_00094	-	-	MPF_F	NC_022651_00077,NC_010409_00124,NC_019000_00022	MOBP	NC_021077	Mobilizable
448	CP009154.1	rep_cluster_215	001483__CP009154_00049	-	-	-	-	-	-	Non-mobilizable
449	CP009155.1	rep_cluster_1398	000733__CP009155_00065	-	-	MPF_T	NC_015383_00006,NC_015383_00077,NC_015383_00072	-	-	Non-mobilizable
450	CP009231.1	IncFIA,IncFIB,IncFIIA,IncFII	000094__NZ_CP015070_00117,000095__NZ_CP014273_00094,000136__AP014877_00014,000121__CP024805	MOBF	NC_017627_00068	MPF_F	NC_017639_00094,NC_014615_00033,NC_019094_00090,NC_013437_00116,08-5333_00200,NC_010719_00096,NC_007675_00027,NC_010409_00124,NC_022651_00077,NC_017054_00096,NC_018966_00040,NC_010488_00021	MOBF	FN868248	Conjugative
451	CP009232.1	IncFII,IncFIIA,IncFIA,IncFIB	000121__CP024805,000136__AP014877_00014,000094__NZ_CP015070_00117,000095__NZ_CP014273_00094	MOBF	NC_017627_00068	MPF_F	NC_014615_00033,NC_013437_00116,NC_017054_00096,NC_007675_00027,NC_010719_00096,08-5333_00200,NC_010409_00124,NC_017639_00094,NC_010488_00021,NC_019094_00090,NC_018966_00040,NC_022651_00077	MOBF	FN868248	Conjugative
452	CP009233.1	IncFIA,IncFII,IncFIIA,IncFIB,ColRNAI_rep_cluster_1291	000094__NZ_CP015070_00117,000121__CP024805,000136__AP014877_00014,000096__NC_019117_00097,000002__NC_009781	MOBF	NC_017627_00068	MPF_F	NC_008460_00107,NC_010409_00124,NC_007675_00027,NC_013437_00116,NC_010719_00097,08-5333_00200,NC_017639_00094,NC_018966_00040,NC_017054_00096,NC_022651_00077,NC_019094_00090,NC_019094_00068	MOBP	AP014804	Conjugative
453	CP009410.2	IncA/C2	000092__CP025470	MOBH	NC_012885_00072	MPF_F	NC_012885_00083,NC_009140_00071,NC_016974_00085,NC_014170_00023,NC_012885_00167	-	-	Conjugative
454	CP009411.2	IncA/C2	000092__CP025470	MOBH	NC_012885_00072	MPF_F	NC_014170_00023,NC_016974_00085,NC_023291_00077,NC_012885_00088,NC_009140_00071,NC_012885_00167,NC_012885_00091,NC_012885_00083	-	-	Conjugative
455	CP009412.2	IncA/C2	000092__CP025470	MOBH	NC_012885_00072	MPF_F	NC_009140_00071,NC_012885_00091,NC_023291_00077,NC_012885_00083,NC_012885_00167,NC_012885_00088,NC_014170_00023,NC_016974_00085	-	-	Conjugative
456	CP009413.2	IncA/C2	000092__CP025470	MOBH	NC_012885_00072	MPF_F	NC_012885_00088,NC_014170_00023,NC_012885_00167,NC_012885_00083,NC_009140_00071,NC_012885_00091,NC_016974_00085,NC_023291_00077	-	-	Conjugative
457	CP009414.2	IncA/C2	000092__CP025470	MOBH	NC_012885_00072	MPF_F	NC_016974_00085,NC_012885_00091,NC_012885_00088,NC_012885_00167,NC_012885_00083,NC_009140_00071,NC_023291_00077,NC_014170_00023	-	-	Conjugative
458	CP009911.1	-	-	-	-	-	-	-	-	Non-mobilizable
459	CP009912.1	-	-	-	-	-	-	-	-	Non-mobilizable
460	CP010513.1	-	-	-	-	MPF_T	NC_009131_00030,NC_007682_00044,NC_008612_00190	-	-	Non-mobilizable
461	CP010830.1	IncFIIA,IncFII	000136__AP014877_00014,000121__CP024805	MOBP,MOBF	NC_011416_00039,NC_017627_00068	MPF_Unknown	08-5333_00200	-	-	Conjugative
462	CP010831.1	IncI1	000145__HE610900_00001	MOBP	NC_019097	MPF_I	NC_022267_00057,NZ_CM001473_00069,NC_022267_00069,NC_019111_00038,NC_023290_00086,NC_019097_00056,NC_019097_00075,NC_019097_00085,NC_015965_00072	MOBP	HM021326	Conjugative
463	CP010832.1	ColRNAI_rep_cluster_1987	000019__CP000651_00005	-	-	-	-	MOBP	AJ001708	Mobilizable
464	CP011000.1	rep_cluster_287,rep_cluster_359	001587__CP011000_00001,001674__CP011000_00218	MOBQ	NC_013545_00086	-	-	-	-	Mobilizable
465	CP011075.1	-	-	-	-	-	-	-	-	Non-mobilizable
466	CP011076.1	-	-	-	-	-	-	-	-	Non-mobilizable
467	CP011251.1	-	-	-	-	MPF_T	NC_005240_00010,NC_005240_00006,NC_017558_00032,NC_005240_00012	-	-	Non-mobilizable
468	CP011490.1	-	-	-	-	-	-	-	-	Non-mobilizable
469	CP011499.1	-	-	-	-	-	-	-	-	Non-mobilizable
470	CP011500.1	-	-	-	-	-	-	-	-	Non-mobilizable
471	CP011540.1	IncA/C2	000092__CP025470	MOBH	NC_012885_00072	MPF_F	NC_012885_00083,NC_016976_00061,NC_012885_00091,NC_009140_00071,NC_012885_00088,NC_014170_00023,NC_012885_00167,NC_023291_00077,NC_016974_00085	MOBH	JQ319772	Conjugative
472	CP011833.1	rep_cluster_349	001664__CP006255_00026	-	-	-	-	-	-	Non-mobilizable
473	CP011841.1	-	-	MOBP	NC_014003_00004	-	-	-	-	Mobilizable
474	CP011842.1	ColRNAI_rep_cluster_1993	000024__JX133088	-	-	-	-	MOBP	AB027308	Mobilizable
475	CP011843.1	IncFII,IncFIB	000114__CP015527,000101__NZ_CP012345_00042	-	-	MPF_F	NC_019094_00090,NC_019002_00076,NC_019002_00072,NC_022651_00077	-	-	Non-mobilizable
476	CP011953.1	rep_cluster_1267	000581__CP011953_00002	-	-	-	-	-	-	Non-mobilizable
477	CP011954.1	rep_cluster_707	002176__NZ_AVAB01000114_00021	MOBQ	NC_015603_00001	-	-	-	-	Mobilizable
478	CP011998.1	-	-	MOBP	NC_021745_01558	-	-	-	-	Mobilizable
479	CP011999.1	rep_cluster_1418,IncFIA	000759__NC_013950_00034,000093__KX023259_00112	-	-	-	-	-	-	Non-mobilizable
480	CP012000.1	IncFIB,IncFII,IncFII	000097__NC_025166_00051,000130__CP023489,000113__CP022035	MOBF	NC_021231_00058	MPF_F	NC_014312_00116,NC_019165_00034,NC_019389_00068,NC_021502_00150,NC_014312_00128,NC_021654_00016,NC_014312_00118,NC_023905_00125,NC_019389_00080,NC_022609_00081,NC_023332_00154	-	-	Conjugative
481	CP012113.1	IncFIB,IncFII,IncFIIA	000095__NZ_CP014273_00094,000121__CP024805,000136__AP014877_00014	MOBF,MOBP	NC_011980_00044,NC_011416_00039	MPF_F	NC_017639_00094,NC_007675_00027,NC_010409_00124,NC_010488_00021,NC_008460_00107,NZ_CM001154_00091,NC_022651_00077,NC_018966_00040,NC_017054_00096	-	-	Conjugative
482	CP012114.1	rep_cluster_488	001852__AP017612_00001	-	-	-	-	-	-	Non-mobilizable
483	CP012118.2	rep_cluster_1017,rep_cluster_1733	000261__GQ900456,001150__NC_013330_00017	-	-	-	-	MOBQ	AF001314	Mobilizable
484	CP012138.1	IncFII,IncFIIA	000121__CP024805,000136__AP014877_00014	MOBF	NC_011980_00044	-	-	-	-	Mobilizable
485	CP012139.1	IncFIIA,IncFII	000136__AP014877_00014,000121__CP024805	MOBF	NC_017627_00068	MPF_F	NC_018966_00040,NC_008460_00107,NC_007675_00027,NC_019094_00090,NC_022651_00077,NC_019094_00068,NC_013437_00116,NC_010409_00124,NC_017639_00094,NC_017054_00096,08-5333_00200,NC_010719_00097	MOBP	AP014804	Conjugative
486	CP012141.1	IncH,rep_cluster_1088	000139__NC_012555_00001,000340__KU353730	MOBH,MOBP	NC_012555_00231,NC_011416_00039	MPF_F	NC_021845_00017,NC_005211_00012,NC_009838_00006,NC_005211_00030,NC_005211_00200,NC_005211_00005,NC_005211_00207	MOBH	NC_004966	Conjugative
487	CP012142.1	IncFIIA,IncFII	000136__AP014877_00014,000121__CP024805	MOBF	NC_011980_00044	-	-	-	-	Mobilizable
488	CP012143.1	IncN	000155__CP018649	MOBF	NC_015599_00019	MPF_T	NC_011617_00041,NC_014368_00014,NC_008612_00190,NC_022375_00024,NC_009131_00030,NC_007682_00044	MOBF	NZ_CP013027	Conjugative
489	CP012178.1	rep_cluster_1267	000581__CP011953_00002	-	-	-	-	-	-	Non-mobilizable
490	CP012197.1	IncFIA,IncFIIA,IncFIB,ColRNAI_rep_cluster_1291,IncFII	000094__NZ_CP015070_00117,000136__AP014877_00014,000095__NZ_CP014273_00094,000002__NC_009781,000121__CP024805	MOBP,MOBF	NC_011416_00039,NC_017627_00068	MPF_F	NC_007675_00027,08-5333_00200,NC_010409_00124,NC_022651_00077,NC_013437_00116,NC_010719_00096,NC_017054_00096,NC_010488_00021,NC_019094_00090,NC_014615_00033,NC_018966_00040,NC_017639_00094	MOBF	FN868248	Conjugative
491	CP012198.1	ColRNAI_rep_cluster_1987	000019__CP000651_00005	-	-	-	-	MOBP	AJ001708	Mobilizable
492	CP012377.1	IncFII,IncFIIA,IncFIB	000121__CP024805,000136__AP014877_00014,000096__NC_019117_00097	MOBF	NC_017627_00068	MPF_F	NC_013437_00116,08-5333_00200,NC_018966_00040,NC_010409_00124,NC_007675_00027,NC_022651_00077,NC_019094_00090,NC_017054_00096,NC_014615_00033,NC_008460_00107,NC_017639_00094	-	-	Conjugative
493	CP012477.1	-	-	-	-	-	-	-	-	Non-mobilizable
494	CP012494.1	IncY	000230__CP009168_00001	-	-	-	-	-	-	Non-mobilizable
495	CP012495.1	IncFIIA,IncFII	000136__AP014877_00014,000121__CP024805	-	-	-	-	-	-	Non-mobilizable
496	CP012496.1	IncFII,IncFIIA,rep_cluster_488	000121__CP024805,000136__AP014877_00014,001852__AP017612_00001	-	-	-	-	-	-	Non-mobilizable
497	CP012732.1	-	-	-	-	-	-	-	-	Non-mobilizable
498	CP012733.1	-	-	-	-	-	-	-	-	Non-mobilizable
499	CP012734.1	IncX1	000215__KC853434_00019	MOBP	NC_019096_00001	MPF_T	NC_023277_00163,NC_017624_00009,NC_019046_00026,NC_019067_00043,NC_010860_00022	MOBP	EU164802	Conjugative
500	CP012736.1	-	-	-	-	-	-	-	-	Non-mobilizable
501	CP012848.1	-	-	-	-	-	-	-	-	Non-mobilizable
502	CP012902.1	IncA/C2,rep_cluster_1254	000092__CP025470,000562__KT346360_00001	MOBH	NC_012885_00072	MPF_F	NC_012885_00083,NC_012885_00088,NC_014170_00023,NC_009140_00071,NC_016974_00085,NC_012885_00091,NC_023291_00077,NC_012885_00167	MOBH	AB040037	Conjugative
503	CP012903.1	rep_cluster_1478,rep_cluster_1254,IncT	000817__NC_020131_00009,000562__KT346360_00001,000208__NC_020123_00061	MOBQ	NC_020131_00006	-	-	-	-	Mobilizable
504	CP012904.1	rep_cluster_1791	001217__CP012904_00004	-	-	-	-	-	-	Non-mobilizable
505	CP012955.1	rep_cluster_1172	000454__KY202458_00008	-	-	-	-	-	-	Non-mobilizable
506	CP012956.1	rep_cluster_1656	001057__CP015616_00173	-	-	-	-	-	-	Non-mobilizable
507	CP013001.1	rep_cluster_125,rep_cluster_173	000558__CP013279,001146__CP013001_00145	-	-	MPF_T	NC_011775_00206	-	-	Non-mobilizable
508	CP013100.1	-	-	MOBP	NC_007949_00237	-	-	-	-	Mobilizable
509	CP013115.1	IncP	000164__NC_022344_00310	MOBP	NC_022344_00316	MPF_T	NC_022344_00321	-	-	Conjugative
510	CP013201.1	-	-	-	-	-	-	-	-	Non-mobilizable
511	CP013204.1	-	-	-	-	-	-	-	-	Non-mobilizable
512	CP013205.1	-	-	-	-	-	-	-	-	Non-mobilizable
513	CP013206.1	-	-	-	-	-	-	-	-	Non-mobilizable
514	CP013207.1	-	-	-	-	-	-	-	-	Non-mobilizable
515	CP013208.1	-	-	-	-	-	-	-	-	Non-mobilizable
516	CP013209.1	-	-	-	-	-	-	-	-	Non-mobilizable
517	CP013215.1	IncH,rep_cluster_1088	000139__NC_012555_00001,000338__NC_021819	MOBH	NC_012555_00231	MPF_F	NC_005211_00005,NC_005211_00200,NC_021845_00017,NC_005211_00012,NC_005211_00207,NC_005211_00030,NC_009838_00006	MOBH	NC_017484	Conjugative
518	CP013276.2	rep_cluster_1912	001352__CP009349	MOBP	NC_018687_00155	MPF_T	NC_010283_00021	-	-	Conjugative
519	CP013277.1	-	-	-	-	-	-	-	-	Non-mobilizable
520	CP013278.1	rep_cluster_1980	001421__NC_018509_00250	-	-	-	-	-	-	Non-mobilizable
521	CP013279.1	rep_cluster_125	000558__CP013279	-	-	-	-	-	-	Non-mobilizable
522	CP013280.1	rep_cluster_459,rep_cluster_920	001806__CP020436_00025,002410__CP003690	-	-	-	-	-	-	Non-mobilizable
523	CP013281.1	rep_cluster_1821	001240__CP013281	MOBV	NC_016780_00010	-	-	-	-	Mobilizable
524	CP013284.1	rep_cluster_1151	000432__CP013284	MOBV	NC_002091_00001	-	-	-	-	Mobilizable
525	CP013295.1	-	-	-	-	-	-	-	-	Non-mobilizable
526	CP013329.1	-	-	-	-	-	-	-	-	Non-mobilizable
527	CP013330.1	-	-	-	-	-	-	-	-	Non-mobilizable
528	CP013471.1	-	-	MOBF	NC_021976_00162	-	-	-	-	Mobilizable
529	CP013473.1	-	-	-	-	-	-	-	-	Non-mobilizable
530	CP013474.1	-	-	-	-	-	-	-	-	Non-mobilizable
531	CP013622.1	rep_cluster_1118	000380__CP013622_00005	MOBP	NC_019969_00003	-	-	-	-	Mobilizable
532	CP013623.1	rep_cluster_1118	000394__NC_020237_00001	MOBP	NC_012000_00003	-	-	-	-	Mobilizable
533	CP013624.1	rep_cluster_1017	000251__CP007673_00019	-	-	-	-	-	-	Non-mobilizable
534	CP013625.1	rep_cluster_1017	000265__NC_019146_00001	-	-	-	-	-	-	Non-mobilizable
535	CP013626.1	rep_cluster_1017	000265__NC_019146_00001	-	-	-	-	-	-	Non-mobilizable
536	CP013627.1	rep_cluster_1018	000268__U32369_00002	MOBV	NC_010936_00005	-	-	MOBV	NZ_CP009579	Mobilizable
537	CP013628.1	rep_cluster_282	001559__KC561137_00007	-	-	-	-	MOBV	NZ_CP009579	Mobilizable
538	CP013629.1	rep_cluster_1018	000267__NC_021513_00007	MOBV	NC_022618_00010	-	-	MOBV	NZ_CP009579	Mobilizable
539	CP013682.1	-	-	-	-	-	-	-	-	Non-mobilizable
540	CP013684.1	rep_cluster_1536	000900__AB855771_00213	-	-	MPF_T	NC_010418_00318,NC_012654_00215	-	-	Non-mobilizable
541	CP013687.1	-	-	MOBP	NC_009496_00008	-	-	-	-	Mobilizable
542	CP013706.1	rep_cluster_958	002440__CP000729_00012	-	-	-	-	-	-	Non-mobilizable
543	CP013708.1	-	-	MOBP	NC_009496_00008	-	-	-	-	Mobilizable
544	CP013709.1	-	-	-	-	-	-	-	-	Non-mobilizable
545	CP013710.1	rep_cluster_1536	000899__NZ_AOSX01000021_00196	-	-	MPF_T	NC_012654_00215,NZ_AOSX01000021_00203,NC_010418_00318	-	-	Non-mobilizable
546	CP013836.1	IncFIIA,IncFIB,IncFIA,IncFII	000136__AP014877_00014,000101__NZ_CP012345_00042,000094__NZ_CP015070_00117,000121__CP024805	-	-	MPF_F	08-5333_00200,NC_017639_00094,NC_010409_00124,NC_017054_00096,NC_019094_00090,NC_010719_00097,NC_007675_00027,NC_022651_00077	MOBF	NC_006830	Mobilizable
547	CP013931.1	rep_cluster_1371	000701__NC_021718_00105	MOBP	NC_019394_00118	MPF_I	NC_019394_00086,NC_019394_00072,NC_019394_00096,NC_019394_00097,NC_019394_00098	-	-	Conjugative
548	CP013960.1	rep_cluster_1017,rep_cluster_936	000259__NC_013375_00001,002421__GU237136_00023	-	-	MPF_T	NC_013653_00035,NC_010279_00007	MOB_unknown	LN890519	Mobilizable
549	CP013986.1	IncFII,IncFII,IncFIB	000131__CP013986,000113__CP022035,000107__CP014778_00094	MOBF	NC_021231_00058	MPF_F	NC_019165_00034,NC_023332_00154,NC_022609_00081,NC_021502_00150,NC_019389_00080,NC_019155_00032,NC_014312_00116,NC_014312_00118,NC_021654_00016,NC_021231_00085,NC_021502_00131,NC_014312_00128	-	-	Conjugative
550	CP014058.2	rep_cluster_1215	000509__NC_016643_00001	-	-	-	-	-	-	Non-mobilizable
551	CP014059.2	IncP	000169__CP016835_00012	MOBP	NC_009739_00028	-	-	-	-	Mobilizable
552	CP014061.1	IncP	000167__AJ344068_00003	-	-	-	-	-	-	Non-mobilizable
553	CP014063.1	rep_cluster_1733	001150__NC_013330_00017	-	-	-	-	MOBV	JQ004409	Mobilizable
554	CP014066.2	rep_cluster_995	002480__NC_019220_00009	MOBP	NC_009739_00028	-	-	-	-	Mobilizable
555	CP014068.2	rep_cluster_919	002407__CP014068	-	-	-	-	-	-	Non-mobilizable
556	CP014096.2	IncI1	000145__HE610900_00001	MOBP	NC_019097	MPF_I	NC_019097_00075,NC_019097_00085,NC_019111_00038,NC_022267_00057,NZ_CM001473_00069,NC_022267_00069,NC_019097_00056,NC_023290_00086,NC_015965_00072	MOBP	HM021326	Conjugative
557	CP014098.1	ColRNAI_rep_cluster_1291	000002__NC_009781	-	-	-	-	MOBQ,MOBQ	NZ_CP012734,DQ318958	Mobilizable
558	CP014100.1	ColRNAI_rep_cluster_1987	000019__CP000651_00005	-	-	-	-	MOBP	AJ001708	Mobilizable
559	CP014101.1	ColRNAI_rep_cluster_1987	000019__CP000651_00005	-	-	-	-	MOBP	AJ001708	Mobilizable
560	CP014114.1	rep_cluster_1215	000509__NC_016643_00001	-	-	-	-	-	-	Non-mobilizable
561	CP014115.1	rep_cluster_1110,rep_cluster_1017	000369__CP003673_00018,000261__GQ900456	-	-	-	-	-	-	Non-mobilizable
562	CP014198.2	ColRNAI_rep_cluster_1857	000008__AJ627566	MOBP,MOBP	NC_019076_00002,NC_017321_00002	-	-	MOBP	NC_017721	Mobilizable
563	CP014199.1	IncFII,IncFIIA	000121__CP024805,000136__AP014877_00014	MOBP,MOBP	NC_013728_00087,NC_011416_00039	-	-	MOBP	FR821780	Mobilizable
564	CP014200.1	IncFIIA,IncFII	000136__AP014877_00014,000121__CP024805	MOBP	NC_011416_00039	-	-	-	-	Mobilizable
565	CP014292.1	rep_cluster_734	002211__NC_010606_00001	MOBF	NC_017163_00021	MPF_F	NC_010606_00071,NC_010606_00076,NC_010606_00080,NC_017163_00020,NZ_AEOY01000095_00077,NC_010606_00075,NC_010606_00072,NC_017163_00053,NC_017163_00052	-	-	Conjugative
566	CP014293.1	rep_cluster_1172	000454__KY202458_00008	-	-	-	-	-	-	Non-mobilizable
567	CP014355.1	rep_cluster_478	001835__NC_010115_00029	-	-	-	-	-	-	Non-mobilizable
568	CP014364.1	rep_cluster_1733,rep_cluster_1017	001150__NC_013330_00017,000261__GQ900456	-	-	-	-	MOBQ	AF001314	Mobilizable
569	CP014369.1	rep_cluster_1017	000258__NC_013297_00004	-	-	-	-	MOB_unknown	NZ_AGFM01000123	Mobilizable
570	CP014379.1	rep_cluster_1947	001391__NC_019143_00002	-	-	-	-	-	-	Non-mobilizable
571	CP014385.1	rep_cluster_1017	000258__NC_013297_00004	-	-	-	-	MOB_unknown	NZ_AGFM01000123	Mobilizable
572	CP014386.1	rep_cluster_1733,rep_cluster_1017	001150__NC_013330_00017,000261__GQ900456	-	-	-	-	MOBQ	AF001314	Mobilizable
573	CP014450.1	rep_cluster_893,Inc18	002374__CP004064_00076,000086__KY579372_00014	-	-	MPF_T	NC_020208_00096	-	-	Non-mobilizable
574	CP014451.1	rep_cluster_150	000837__AB183714_00060	-	-	MPF_T	NC_007594_00029	MOBP	CP021881	Mobilizable
575	CP014452.1	rep_cluster_889	002366__KY595966_00031	-	-	-	-	-	-	Non-mobilizable
576	CP014493.1	IncFIIA,IncFII,ColRNAI_rep_cluster_1291,IncFIB	000136__AP014877_00014,000121__CP024805,000002__NC_009781,000096__NC_019117_00097	-	-	MPF_F	NC_019094_00068,NC_017054_00096,NC_017630_00031,NC_019072_00073,NC_018966_00040,NC_010409_00124,NC_008460_00107,NC_022651_00077,NC_007675_00027	MOBF	NC_010600	Mobilizable
577	CP014494.1	IncI1	000145__HE610900_00001	-	-	MPF_I	NC_022267_00069,NC_019097_00075,NC_022267_00057,NC_019111_00038,NC_015965_00072,NC_023290_00086,NZ_CM001473_00069	MOBP	JN253636	Mobilizable
578	CP014652.1	rep_cluster_1218	000512__CP014652_00146	MOBP	NZ_AEOY01000096_00007	-	-	-	-	Mobilizable
579	CP014653.1	rep_cluster_639	002092__CU459140_00002	-	-	-	-	-	-	Non-mobilizable
580	CP014654.1	-	-	-	-	-	-	-	-	Non-mobilizable
581	CP014655.1	rep_cluster_1226	000523__LT594096_00001	-	-	-	-	-	-	Non-mobilizable
582	CP014656.1	-	-	-	-	-	-	-	-	Non-mobilizable
583	CP014753.1	IncFIB	000096__NC_019117_00097	MOBF,MOBP	NC_017627_00068,NC_011416_00039	MPF_Unknown	08-5333_00200	MOBF	NC_009716	Conjugative
584	CP014776.1	rep_cluster_1150	000430__CP020850	MOBH	NC_016980_00239	MPF_F	NC_016980_00109,NC_018107_00235,NC_023911_00309,NC_018107_00101,NC_016980_00240,NC_016980_00110,NC_016980_00099	-	-	Conjugative
585	CP014777.1	rep_cluster_1418	000759__NC_013950_00034	MOBF	NC_021231_00058	MPF_F	NC_014312_00116,NC_022609_00081,NC_014312_00141,NC_021502_00150,NC_023332_00154,NC_021231_00085,NC_019389_00080,NC_021654_00016,NC_021502_00131,NC_014312_00118,NC_014312_00128,NC_019165_00034	-	-	Conjugative
586	CP014778.1	rep_cluster_1150,IncFIB	000430__CP020850,000107__CP014778_00094	-	-	-	-	-	-	Non-mobilizable
587	CP014779.1	ColRNAI_rep_cluster_1857	000012__CP000801	-	-	-	-	-	-	Non-mobilizable
588	CP014788.1	-	-	-	-	-	-	-	-	Non-mobilizable
589	CP014789.1	-	-	-	-	-	-	-	-	Non-mobilizable
590	CP014962.1	IncFII,IncFIB	000114__CP015527,000101__NZ_CP012345_00042	MOBF	NC_007208_00043	MPF_F	NC_017054_00100,NZ_CM001063_00039,NC_019002_00072,NC_013437_00116,NC_019112_00063,NC_017054_00095,NC_019094_00090,NC_022651_00077,NC_014615_00033,NC_003277_00107,NC_017054_00098,NC_017054_00096	-	-	Conjugative
591	CP015181.1	rep_cluster_617	002066__NC_020243_00001	MOBP	NC_020243_00005	-	-	-	-	Mobilizable
592	CP015456.1	-	-	-	-	-	-	-	-	Non-mobilizable
593	CP015599.1	IncFIB,IncFII	000101__NZ_CP012345_00042,000114__CP015527	MOBF	NC_011980_00044	MPF_F	NC_017054_00096,NC_017054_00100,NC_022651_00077,NC_017054_00095,NC_003277_00107,NC_019094_00090,NC_019112_00063,NC_014615_00033,NC_017054_00098,NC_019002_00072,NC_013437_00116,NC_021155_00062	-	-	Conjugative
594	CP015627.1	rep_cluster_1230	000527__CP015627_00001	MOBC	NC_004669_00010	-	-	-	-	Mobilizable
595	CP015628.1	-	-	-	-	-	-	-	-	Non-mobilizable
596	CP015630.1	-	-	-	-	-	-	-	-	Non-mobilizable
597	CP015631.1	-	-	-	-	-	-	-	-	Non-mobilizable
598	CP015632.1	-	-	-	-	-	-	-	-	Non-mobilizable
599	CP015633.1	-	-	-	-	-	-	-	-	Non-mobilizable
600	CP015634.1	-	-	-	-	-	-	-	-	Non-mobilizable
601	CP015635.1	-	-	-	-	-	-	-	-	Non-mobilizable
602	CP015636.1	-	-	-	-	-	-	-	-	Non-mobilizable
603	CP016074.1	rep_cluster_1118	000385__CP016074_00003	MOBV	NC_001391_00002	-	-	-	-	Mobilizable
604	CP016075.1	rep_cluster_1118	000379__NC_013452_00003	MOBV	NC_010262_00002	-	-	-	-	Mobilizable
605	CP016081.1	-	-	-	-	-	-	-	-	Non-mobilizable
606	CP016082.1	-	-	-	-	-	-	-	-	Non-mobilizable
607	CP016083.1	-	-	-	-	-	-	-	-	Non-mobilizable
608	CP016084.1	rep_cluster_1910	001349__NC_020545_00078	-	-	-	-	-	-	Non-mobilizable
609	CP016183.1	IncFIA	000093__KX023259_00112	MOBH,MOBP	NC_013365_00169,NC_011416_00039	MPF_F	NC_005211_00030,NC_002305_00120,NC_019360_00278,NC_002305_00127,NC_019360_00256,NC_009981_00239,NC_019360_00255	-	-	Conjugative
610	CP016184.1	IncFIA	000093__KX023259_00112	MOBH	NC_013365_00169	MPF_F	NC_019360_00255,NC_019360_00256,NC_005211_00030,NC_002305_00120,NC_019360_00278,NC_002305_00127,NC_009981_00239	-	-	Conjugative
611	CP016185.1	IncI2	000147__CP006264_00003	MOBP	NC_022520_00030	MPF_T	NC_020270_00063,NC_019039_00052,NC_019039_00051,NC_020270_00058,NC_019039_00065	-	-	Conjugative
612	CP016186.1	IncI2	000147__CP006264_00003	MOBP	NC_022520_00030	MPF_T	NC_019039_00052,NC_020270_00063,NC_019039_00065,NC_020270_00058,NC_019039_00051	-	-	Conjugative
613	CP016187.1	IncI2	000147__CP006264_00003	MOBP	NC_022520_00030	MPF_T	NC_019039_00065,NC_020270_00058,NC_019039_00051,NC_019039_00052	-	-	Conjugative
614	CP016195.1	rep_cluster_1721,rep_cluster_1869	001136__CP015254,001302__CP007624	-	-	-	-	-	-	Non-mobilizable
615	CP016196.1	rep_cluster_164	001039__CP009595	-	-	-	-	-	-	Non-mobilizable
616	CP016197.1	rep_cluster_242	001519__CP016197_00059	-	-	-	-	-	-	Non-mobilizable
617	CP016198.1	rep_cluster_1721	001136__CP015254	-	-	-	-	-	-	Non-mobilizable
618	CP016203.1	-	-	-	-	-	-	-	-	Non-mobilizable
619	CP016253.1	rep_cluster_1317	000635__AY312585	-	-	-	-	-	-	Non-mobilizable
620	CP016281.1	-	-	-	-	-	-	-	-	Non-mobilizable
621	CP016287.1	rep_cluster_468	001817__NC_019313_00140	-	-	MPF_T	NT_187148_00147,NC_010996_00194,NC_004041_00170,NC_010996_00200	-	-	Non-mobilizable
622	CP016288.1	rep_cluster_512	001886__CP016288	-	-	MPF_T	NC_021909_00024,NC_011370_00141,NC_011370_00139,NC_011370_00135,NC_021909_00030	-	-	Non-mobilizable
623	CP016289.1	-	-	-	-	-	-	-	-	Non-mobilizable
624	CP016290.1	rep_cluster_468,rep_cluster_471	001817__NC_019313_00140,001820__CP013523_00221	MOBQ	NC_002575_00134	MPF_T	NC_002575_00131,NC_019555_00155,NC_009621_00340	-	-	Conjugative
625	CP016291.1	rep_cluster_841	002324__CP013491_00052	-	-	-	-	-	-	Non-mobilizable
626	CP016292.1	rep_cluster_590	002015__EF066650_00001	MOBQ	NC_008383_00124	MPF_T	NC_011987_00051,NC_008383_00141,NC_010865_00164,NC_008383_00121	-	-	Conjugative
627	CP016293.1	-	-	-	-	-	-	-	-	Non-mobilizable
628	CP016334.1	-	-	MOBQ	NC_012760_00009	-	-	-	-	Mobilizable
629	CP016402.1	IncFIIA,IncU,IncFII	000136__AP014877_00014,000210__KF623109_00045,000121__CP024805	-	-	-	-	-	-	Non-mobilizable
630	CP016403.1	IncR,IncFIIA,IncFII,IncU	000204__CP008701_00115,000136__AP014877_00014,000121__CP024805,000210__KF623109_00045	-	-	-	-	-	-	Non-mobilizable
631	CP016419.1	rep_cluster_308,rep_cluster_1583	001618__CP003964_00004,000959__NC_001372_00007	-	-	-	-	-	-	Non-mobilizable
632	CP016691.1	rep_cluster_1378	000716__CP016691_00001	-	-	-	-	-	-	Non-mobilizable
633	CP016692.1	rep_cluster_1376	000713__CP016731_00001	MOBP	NC_019348_00003	-	-	-	-	Mobilizable
634	CP016693.1	rep_cluster_667	002127__CP016693_00001	-	-	-	-	-	-	Non-mobilizable
635	CP016703.1	rep_cluster_1871	001305__CP016703_00001	-	-	-	-	-	-	Non-mobilizable
636	CP016763.1	IncFII,IncFII,IncFIB	000114__CP015527,000122__JQ418538,000107__CP014778_00094	MOBF	NC_021501_00073	MPF_F	NC_021501_00083,NC_006323_00096,NC_021501_00076,NC_021501_00074,NC_021501_00084,NC_021501_00085,NC_021501_00097,NC_006323_00097,NC_006323_00113,NC_006323_00105,NC_009378_00101	-	-	Conjugative
637	CP016838.1	rep_cluster_1088,IncH	000340__KU353730,000139__NC_012555_00001	MOBP,MOBH	NC_011416_00039,NC_012555_00231	MPF_F	NC_021845_00017,NC_005211_00005,NC_005211_00012,NC_005211_00030,NC_005211_00200,NC_005211_00207,NC_009838_00006	MOBH	NC_015175	Conjugative
638	CP016920.1	rep_cluster_1195	000483__CP010949_00006	MOBP	NC_019160_00002	-	-	-	-	Mobilizable
639	CP016921.1	rep_cluster_1150,IncH,rep_cluster_1254	000430__CP020850,000137__CP017986_00041,000562__KT346360_00001	MOBH	NC_016980_00239	MPF_F	NC_018107_00235,NC_018107_00101,NC_016980_00099,NC_016980_00109,NC_016980_00110,NC_016980_00240,NC_023911_00309	-	-	Conjugative
640	CP016924.1	IncFIB	000100__NZ_CP016161_00012	-	-	-	-	-	-	Non-mobilizable
641	CP016969.1	-	-	-	-	-	-	-	-	Non-mobilizable
642	CP016970.1	rep_cluster_1110	000370__CP016859_00043	-	-	-	-	-	-	Non-mobilizable
643	CP016971.1	rep_cluster_1215	000507__AE015933_00005	-	-	-	-	-	-	Non-mobilizable
644	CP017095.2	rep_cluster_1017,rep_cluster_1733	000261__GQ900456,001150__NC_013330_00017	-	-	-	-	MOBQ	AF001314	Mobilizable
645	CP017309.1	-	-	-	-	-	-	-	-	Non-mobilizable
646	CP017416.1	-	-	MOBP	NC_022355_00016	MPF_T	NC_022355_00047,NC_006134_00038,NC_022355_00040,NC_022355_00043	-	-	Conjugative
647	CP017417.1	-	-	-	-	-	-	-	-	Non-mobilizable
648	CP017418.1	rep_cluster_475	001828__CP007750	MOBP	NC_022355_00016	MPF_T	NC_022355_00043,NC_007141_00026,NC_006135_00040,NC_022355_00047	-	-	Conjugative
649	CP017419.1	-	-	MOBP	NC_022355_00016	MPF_T	NC_022355_00043,NC_022355_00040,NC_022355_00047,NC_006134_00038	-	-	Conjugative
650	CP017618.1	IncFII,IncFIB	000114__CP015527,000101__NZ_CP012345_00042	MOBF	NC_007208_00043	MPF_F	NC_019002_00072,NC_019112_00063,NZ_CM001063_00039,NC_019094_00090,NC_017054_00100,NC_022651_00077,NC_013437_00116,NC_014615_00033,NC_017054_00096,NC_017054_00098	-	-	Conjugative
651	CP017619.1	ColRNAI_rep_cluster_1993	000024__JX133088	-	-	-	-	MOBP	AB027308	Mobilizable
652	CP017672.1	rep_cluster_1220,rep_cluster_1220	000517__CP008919_00003,000516__KX832928_00016	-	-	-	-	-	-	Non-mobilizable
653	CP017835.1	-	-	-	-	-	-	-	-	Non-mobilizable
654	CP017836.1	-	-	-	-	-	-	-	-	Non-mobilizable
655	CP017887.1	rep_cluster_1711	001121__LN713927_00071	-	-	-	-	-	-	Non-mobilizable
656	CP017893.1	rep_cluster_273	001549__CP017893	-	-	-	-	-	-	Non-mobilizable
657	CP017894.1	-	-	-	-	-	-	-	-	Non-mobilizable
658	CP017904.1	rep_cluster_273	001549__CP017893	-	-	-	-	-	-	Non-mobilizable
659	CP017929.1	IncFII,IncFII	000122__JQ418538,000111__NZ_CP011595_00114	MOBF	NC_019125_00139	MPF_F	NC_019342_00058,NC_021817_00023,NC_021817_00021,NC_021871_00022,NC_021871_00015,NC_019342_00064,NC_021817_00020,NC_019125_00135,NZ_AGTD01000004_00091,NC_021817_00013,NZ_AGTD01000004_00094	MOBF	KT935446	Conjugative
660	CP017991.1	IncFIB,IncFII	000109__NC_015963_00158,000113__CP022035	MOBF	NC_015963_00101	MPF_F	NC_015963_00068,NC_015963_00087,NC_014107_00127,NC_015963_00088,NC_015963_00071,NC_015963_00078,NC_015963_00069,NC_014107_00137,NC_015963_00100,NC_014107_00145,NC_014107_00135	-	-	Conjugative
661	CP018141.1	rep_cluster_1364	000683__KY499579_00008	-	-	-	-	-	-	Non-mobilizable
662	CP018142.1	rep_cluster_1276	000590__CP018142_00007	-	-	-	-	-	-	Non-mobilizable
663	CP018310.1	-	-	-	-	-	-	-	-	Non-mobilizable
664	CP018652.1	IncFIA	000093__KX023259_00112	MOBH	NC_013365_00169	MPF_F	NC_002305_00127,NC_019360_00278,NC_019360_00256,NC_009981_00239,NC_005211_00030,NC_002305_00120,NC_019360_00255	-	-	Conjugative
665	CP018767.1	rep_cluster_1017,rep_cluster_1733	000261__GQ900456,001150__NC_013330_00017	-	-	-	-	MOBQ	AF001314	Mobilizable
666	CP019078.1	IncL/M	000148__NC_021488_00028	MOBP	NC_004464_00056	MPF_I	NC_004464_00068,NC_019344_00078,NC_019063_00094,NC_019154_00069,NC_004464_00066,NC_004464_00073,NC_005246_00069,NC_004464_00105,NC_005246_00057	-	-	Conjugative
667	CP019195.1	rep_cluster_1088,IncH	000340__KU353730,000139__NC_012555_00001	MOBP,MOBH	NC_011416_00039,NC_012555_00231	MPF_F	NC_005211_00207,NC_009838_00006,NC_005211_00030,NC_005211_00200	MOBH	NC_025190	Conjugative
668	CP019349.1	rep_cluster_1058	000300__NC_008499_00039	MOBQ	NC_021528_00001	-	-	-	-	Mobilizable
669	CP019350.1	-	-	-	-	-	-	-	-	Non-mobilizable
670	CP019351.1	-	-	-	-	-	-	-	-	Non-mobilizable
671	CP019561.1	IncFII,IncFIIA	000121__CP024805,000136__AP014877_00014	MOBP,MOBF	NC_011416_00039,NC_017627_00068	MPF_F	NC_010488_00021,NC_017054_00096,08-5333_00200,NC_007675_00027,NC_019094_00090,NC_022651_00077,NC_017639_00094,NC_013437_00116,NC_010719_00096,NC_010409_00124,NC_014615_00033,NC_018966_00040	MOBF	CP012166	Conjugative
672	CP019598.1	rep_cluster_1110,rep_cluster_1017	000371__DQ390456_00046,000261__GQ900456	-	-	-	-	-	-	Non-mobilizable
673	CP019599.1	rep_cluster_1118	000390__NC_002096_00001	MOBV	NC_010262_00002	-	-	-	-	Mobilizable
674	CP019647.1	IncN,rep_cluster_1088,IncH	000155__CP018649,000340__KU353730,000139__NC_012555_00001	MOBH,MOBP	NC_012555_00231,NC_011416_00039	MPF_F	NC_021845_00017,NC_005211_00012,NC_009838_00006,NC_008612_00190,NC_005211_00207,NC_005211_00030,NC_005211_00005,NC_005211_00200	MOBH	NC_004966	Conjugative
675	CP019690.1	IncI2	000147__CP006264_00003	MOBP	NC_022520_00030	MPF_T	NC_019039_00051,NC_019039_00065,NC_019039_00052,NC_020270_00063,NC_020270_00058	-	-	Conjugative
676	CP019691.1	-	-	MOBP	NC_019097	MPF_I	NC_022267_00057,NZ_CM001473_00069,NC_023290_00086,NC_019097_00085,NC_022267_00069,NC_015965_00072,NC_019111_00038,NC_019097_00056,NC_019097_00075	MOBP	JN253636	Conjugative
677	CP019692.1	-	-	-	-	-	-	-	-	Non-mobilizable
678	CP019693.1	ColRNAI_rep_cluster_1291	000001__EU090225_00001	MOBQ	NC_013719_00001	-	-	-	-	Mobilizable
679	CP019694.1	-	-	-	-	-	-	-	-	Non-mobilizable
680	CP019695.1	ColRNAI_rep_cluster_1857	000008__AJ627566	MOBF	CP019897	-	-	MOB_unknown	NC_011407	Mobilizable
681	CP019696.1	IncFIIA,IncFII	000136__AP014877_00014,000121__CP024805	MOBP,MOBF	NC_011416_00039,NC_017627_00068	MPF_Unknown	08-5333_00200	-	-	Conjugative
682	CP019709.1	IncFIB	000104__CP010386_00052	-	-	-	-	-	-	Non-mobilizable
683	CP019710.1	IncFII,rep_cluster_645	000122__JQ418538,002101__NC_004564_00056	-	-	-	-	-	-	Non-mobilizable
684	CP019711.1	ColRNAI_rep_cluster_1857	000008__AJ627566	-	-	-	-	MOBP	NC_017657	Mobilizable
685	CP019727.1	rep_cluster_125	000558__CP013279	MOBP	NC_012579_00171	MPF_T	NC_017203_00099,NC_018501_00133	-	-	Conjugative
686	CP019890.1	IncFII,IncFIA	000135__NC_014107_00001,000093__KX023259_00112	MOBF	NC_014107_00160	MPF_F	NC_009425_00108,NC_014107_00145,NC_014107_00135,NC_015963_00068,NC_014107_00127,NC_014107_00154,NC_014107_00147,NC_014107_00126,NC_014107_00137,NC_014107_00139	-	-	Conjugative
687	CP019891.1	IncFIB	000104__CP010386_00052	-	-	-	-	-	-	Non-mobilizable
688	CP019895.1	ColRNAI_rep_cluster_1291	000001__EU090225_00001	MOBQ	NC_013719_00001	-	-	-	-	Mobilizable
689	CP019896.1	ColRNAI_rep_cluster_1291	000001__EU090225_00001	MOBQ	NC_013719_00001	-	-	-	-	Mobilizable
690	CP019897.1	ColRNAI_rep_cluster_1987	000019__CP000651_00005	MOBF	CP019897	-	-	MOB_unknown	NZ_CP014319	Mobilizable
691	CP019898.1	rep_cluster_1159	000438__X01654	MOBQ	NC_002056_00006	-	-	-	-	Mobilizable
692	CP019900.1	IncR	000204__CP008701_00115	MOBF	NC_021231_00058	-	-	-	-	Mobilizable
693	CP019902.1	rep_cluster_2050,ColRNAI_rep_cluster_1987	001473__CP024541,000019__CP000651_00005	-	-	-	-	-	-	Non-mobilizable
694	CP019954.1	IncFIIA,IncFIB,IncFII	000136__AP014877_00014,000096__NC_019117_00097,000121__CP024805	MOBF,MOBP	NC_017627_00068,NC_019097	MPF_I	NC_022267_00057,NC_011419_00085,NC_013437_00116,NC_019097_00075,NC_015965_00072,NC_019037_00027,NC_019097_00056,NC_007675_00027,NC_023290_00086,08-5333_00200,NC_017054_00096,NC_010719_00096,NC_017639_00094,NC_010719_00097	MOBF	CP016751	Conjugative
695	CP019955.1	ColRNAI_rep_cluster_1291	000001__EU090225_00001	MOBQ	NC_019783_00003	-	-	-	-	Mobilizable
696	CP019956.1	ColRNAI_rep_cluster_1857	000008__AJ627566	-	-	-	-	-	-	Non-mobilizable
697	CP019996.1	IncI1	000144__CP015838_00058	MOBP	NC_019097	MPF_I	NC_019097_00085,NC_015965_00072,NC_022267_00057,NC_023290_00086,NC_019097_00056,NZ_CM001473_00069,NC_022267_00069,NC_019097_00075,NC_019111_00038	MOBP	JN253636	Conjugative
698	CP019997.1	ColRNAI_rep_cluster_1987	000019__CP000651_00005	MOBP	NC_013090_00004	-	-	MOBP	KT693145	Mobilizable
699	CP020003.1	rep_cluster_887	002364__CP020003	-	-	-	-	-	-	Non-mobilizable
700	CP020004.1	-	-	-	-	-	-	-	-	Non-mobilizable
701	CP020005.1	rep_cluster_125	000558__CP013279	-	-	MPF_unknown	NC_018501_00133,NC_017203_00099	-	-	Non-mobilizable
702	CP020084.1	-	-	-	-	-	-	-	-	Non-mobilizable
703	CP020087.1	IncFII,IncFIIA	000121__CP024805,000136__AP014877_00014	MOBF	NC_011980_00044	-	-	-	-	Mobilizable
704	CP020088.1	IncX1	000215__KC853434_00019	MOBP	NC_019096_00001	MPF_T	NC_010860_00022,NC_019067_00043,NC_023277_00163,NC_019046_00026,NC_017624_00009	MOBP	EU164802	Conjugative
705	CP020113.1	IncFIB,IncFII	000095__NZ_CP014273_00094,000114__CP015527	MOBF	NC_007208_00043	MPF_F	NC_017054_00095,NC_017054_00096,NZ_CM001063_00039,NC_017054_00098,NC_017054_00100,NC_019112_00063,NC_019094_00090,NC_014615_00033,NC_022651_00077,NC_013437_00116,NC_019002_00072,NC_003277_00107	-	-	Conjugative
706	CP020337.1	IncFII,IncFIIA	000121__CP024805,000136__AP014877_00014	MOBF	NC_011980_00044	-	-	-	-	Mobilizable
707	CP020338.1	IncI1,IncFII	000145__HE610900_00001,000121__CP024805	MOBF	NC_022333_00006	MPF_F	NZ_AGTD01000004_00104,NZ_AGTD01000004_00099,NC_022333_00021,NC_009787_00004,NZ_AGTD01000004_00091,NZ_AGTD01000004_00094,NC_021817_00023,NC_021871_00015,NC_007635_00031,NC_022333_00014,NZ_AGTD01000004_00096	-	-	Conjugative
708	CP020340.1	IncFIIA,IncFII	000136__AP014877_00014,000121__CP024805	-	-	MPF_F	NC_019094_00068,NC_018966_00040,NC_010719_00097,08-5333_00200,NC_019037_00043,NC_017054_00096,NC_007675_00027,NC_017639_00094,NC_008460_00107,NC_013437_00116	MOBF	CP010239	Mobilizable
709	CP020341.1	IncX1	000215__KC853434_00019	MOBP	NC_019096_00001	MPF_T	NC_023277_00163,NC_017624_00009	MOBP	EU164802	Conjugative
710	CP020343.1	IncFII,IncFIIA	000121__CP024805,000136__AP014877_00014	MOBF	NC_011980_00044	-	-	-	-	Mobilizable
711	CP020344.1	IncFIB	000107__CP014778_00094	MOBC	NC_014725_00039	MPF_T	NC_011092_00102,NC_011092_00100	-	-	Conjugative
712	CP020348.1	-	-	-	-	-	-	-	-	Non-mobilizable
713	CP020349.1	-	-	-	-	-	-	-	-	Non-mobilizable
714	CP020376.1	IncX4	000224__NC_022105_00002	MOBP	NC_013718_00057	MPF_T	NC_013718_00041,NC_021079_00038,NC_013718_00044,NC_013718_00045	-	-	Conjugative
715	CP020571.1	-	-	-	-	-	-	-	-	Non-mobilizable
716	CP020572.1	rep_cluster_1113	000374__CP010826_00070	-	-	-	-	-	-	Non-mobilizable
717	CP020721.1	-	-	-	-	-	-	-	-	Non-mobilizable
718	CP020736.1	rep_cluster_1256	000568__NC_013380_00007	MOBP	NC_005566_00002	-	-	MOBP	CP018949	Mobilizable
719	CP020755.1	rep_cluster_125,rep_cluster_1721	000558__CP013279,001137__CP004861	-	-	-	-	-	-	Non-mobilizable
720	CP020756.1	rep_cluster_1721,rep_cluster_484	001137__CP004861,001844__CP010580	-	-	-	-	-	-	Non-mobilizable
721	CP020757.1	-	-	-	-	-	-	-	-	Non-mobilizable
722	CP020758.1	rep_cluster_1721,rep_cluster_169	001137__CP004861,001091__NC_009841_00034	-	-	MPF_T	NC_009841_00055	-	-	Non-mobilizable
723	CP020759.1	-	-	-	-	-	-	-	-	Non-mobilizable
724	CP020760.1	rep_cluster_485	001848__CP020760	-	-	-	-	-	-	Non-mobilizable
725	CP020765.1	rep_cluster_1118	000389__NC_002093_00001	-	-	-	-	-	-	Non-mobilizable
726	CP020766.1	rep_cluster_1215	000508__GQ900453_00001	MOBQ	NC_002774_00004	-	-	-	-	Mobilizable
727	CP020770.1	rep_cluster_1944	001384__CP020770	-	-	-	-	-	-	Non-mobilizable
728	CP020871.1	rep_cluster_1323	000642__JX548317	MOBP	NC_010579_00024	MPF_T	NC_010579_00004,NC_010579_00023,NC_010579_00002	-	-	Conjugative
729	CP020963.1	-	-	-	-	-	-	-	-	Non-mobilizable
730	CP020972.1	-	-	MOBP	NC_022539_00043	MPF_T	NC_022539_00042	-	-	Conjugative
731	CP020973.1	rep_cluster_1991	001431__CP018733	-	-	MPF_T	NC_017556_00021	-	-	Non-mobilizable
732	CP020974.1	rep_cluster_1991	001431__CP018733	-	-	-	-	-	-	Non-mobilizable
733	CP021013.1	-	-	-	-	MPF_T	NC_022539_00042	-	-	Non-mobilizable
734	CP021014.1	rep_cluster_1991	001431__CP018733	-	-	MPF_T	NC_017556_00021	-	-	Non-mobilizable
735	CP021082.1	-	-	MOBP	NC_012527_00053	-	-	-	-	Mobilizable
736	CP021083.1	rep_cluster_202	001453__CP021083	-	-	-	-	-	-	Non-mobilizable
737	CP021084.1	-	-	-	-	-	-	-	-	Non-mobilizable
738	CP021085.1	-	-	-	-	-	-	-	-	Non-mobilizable
739	CP021131.1	-	-	-	-	-	-	-	-	Non-mobilizable
740	CP021194.1	IncI2	000147__CP006264_00003	MOBP	NC_022520_00030	MPF_T	NC_020270_00058,NC_019039_00065,NC_019039_00052,NC_020270_00063,NC_019039_00051	-	-	Conjugative
741	CP021195.1	IncFII,IncU,IncR,IncFII	000114__CP015527,000210__KF623109_00045,000204__CP008701_00115,000129__CP018340	MOBF	NC_021231_00058	MPF_F	NC_021654_00016,NC_014312_00128,NC_023332_00154,NC_014312_00116,NC_019389_00068,NC_022609_00081,NC_019165_00034,NC_021502_00131,NC_019389_00080,NC_021502_00150,NC_014312_00118,NC_019155_00032	-	-	Conjugative
742	CP021196.1	rep_cluster_1088,IncH	000340__KU353730,000139__NC_012555_00001	MOBH,MOBP	NC_012555_00231,NC_011416_00039	MPF_F	NC_005211_00005,NC_005211_00030,NC_005211_00207,NC_009838_00006,NC_005211_00200,NC_021845_00017,NC_005211_00012	MOBH	NC_004966	Conjugative
743	CP021197.1	IncFIIA	000136__AP014877_00014	MOBP	NC_013728_00087	MPF_I	NC_011754_00087,NC_007365_00033,NC_022371_00084,NC_014843_00033,NC_007365_00035,NC_011754_00109,NC_012487_00131,NC_022992_00098,NC_014843_00047	MOBP	FR821780	Conjugative
744	CP021198.1	IncFIIA,IncFIB,IncFII	000136__AP014877_00014,000096__NC_019117_00097,000121__CP024805	MOBF,MOBP	NC_011980_00044,NC_011416_00039	MPF_F	NC_008460_00107,NC_010409_00124,NC_019094_00090,NC_018966_00040,NC_010488_00021,NC_017639_00094,NC_013437_00116,NC_007675_00027,08-5333_00200,NC_014615_00033,NC_017054_00096	MOBF	HG796403	Conjugative
745	CP021236.1	-	-	-	-	-	-	-	-	Non-mobilizable
746	CP021331.1	-	-	-	-	-	-	-	-	Non-mobilizable
747	CP021332.1	-	-	-	-	-	-	-	-	Non-mobilizable
748	CP021372.1	rep_cluster_287	001585__CP000741_00153	-	-	MPF_F	NC_017958_00056	-	-	Non-mobilizable
749	CP021373.1	-	-	-	-	-	-	-	-	Non-mobilizable
750	CP021374.1	-	-	-	-	-	-	-	-	Non-mobilizable
751	CP021375.1	rep_cluster_352	001667__CP021214	MOBQ	NC_002377_00032	MPF_T	NC_002377_00104,NC_003065_00132,NC_011982_00266	-	-	Conjugative
752	CP021418.1	IncX4	000224__NC_022105_00002	MOBP	NC_013718_00057	MPF_T	NC_013718_00041,NC_013718_00045,NC_021079_00038,NC_013718_00044	-	-	Conjugative
753	CP021419.1	IncX4	000224__NC_022105_00002	MOBP	NC_013718_00057	MPF_T	NC_013718_00044,NC_013718_00041,NC_021079_00038,NC_013718_00045	-	-	Conjugative
754	CP021492.1	-	-	-	-	-	-	-	-	Non-mobilizable
755	CP021493.1	rep_cluster_589	002012__CP021493_00020	MOBV	NC_016821_00017	-	-	-	-	Mobilizable
756	CP021494.1	rep_cluster_589	002012__CP021493_00020	MOBV	NC_016821_00017	-	-	-	-	Mobilizable
757	CP021660.1	-	-	-	-	-	-	-	-	Non-mobilizable
758	CP021662.1	-	-	-	-	-	-	-	-	Non-mobilizable
759	CP021763.1	-	-	MOBP	NC_003296_00524	-	-	-	-	Mobilizable
760	CP021765.1	-	-	MOBP	NC_003296_00524	-	-	-	-	Mobilizable
761	CP021792.1	Inc13	000081__NC_011363_00001	-	-	-	-	-	-	Non-mobilizable
762	CP021873.1	-	-	-	-	-	-	-	-	Non-mobilizable
763	CP021895.1	ColRNAI_rep_cluster_1987	000019__CP000651_00005	MOBP	NC_013090_00004	-	-	MOBP	KT693145	Mobilizable
764	CP022016.1	-	-	-	-	-	-	-	-	Non-mobilizable
765	CP022017.1	-	-	-	-	-	-	-	-	Non-mobilizable
766	CP022090.2	-	-	-	-	-	-	-	-	Non-mobilizable
767	CP022125.1	IncFII,IncFII,IncFIB	000114__CP015527,000132__HG969996,000107__CP014778_00094	MOBF	NC_021231_00058	MPF_F	NC_023332_00154,NC_019389_00080,NC_022609_00081,NC_014312_00141,NC_014312_00116,NC_021654_00016,NC_021502_00150,NC_019165_00034,NC_021502_00131,NC_019389_00068,NC_014312_00128,NC_014312_00118	-	-	Conjugative
768	CP022126.1	IncA/C2	000092__CP025470	MOBH	NC_012885_00072	MPF_F	NC_023291_00077,NC_014170_00023,NC_012885_00088,NC_012885_00091,NC_009140_00071,NC_012885_00083,NC_012885_00167,NC_016974_00085	MOBH	HG428760	Conjugative
769	CP022128.1	IncFIB	000100__NZ_CP016161_00012	-	-	-	-	-	-	Non-mobilizable
770	CP022284.1	rep_cluster_1903,rep_cluster_1259	001339__KY202458_00009,000571__CP015620_00012	-	-	-	-	-	-	Non-mobilizable
771	CP022285.1	-	-	-	-	-	-	-	-	Non-mobilizable
772	CP022320.1	-	-	-	-	-	-	-	-	Non-mobilizable
773	CP022357.1	rep_cluster_1372	000702__CP022357_00001	-	-	-	-	-	-	Non-mobilizable
774	CP022456.1	IncI1	000145__HE610900_00001	MOBP	NC_019097	MPF_I	NC_023290_00086,NC_022267_00069,NC_019097_00085,NC_019097_00075,NC_019097_00056,NC_015965_00072,NC_022267_00057	-	-	Conjugative
775	CP022458.1	-	-	MOBP	NC_013728_00087	MPF_I	NC_012487_00131,NC_011754_00109,NC_014843_00047,NC_022992_00098,NC_011754_00087,NC_022371_00084,NC_007365_00035,NC_014843_00041,NC_014843_00033	MOBP	CP018984	Conjugative
776	CP022460.1	IncFIIA,IncFII	000136__AP014877_00014,000121__CP024805	-	-	-	-	-	-	Non-mobilizable
777	CP022461.1	rep_cluster_488	001852__AP017612_00001	-	-	-	-	-	-	Non-mobilizable
778	CP022517.1	rep_cluster_1232	000534__NZ_CM003471_00551	-	-	-	-	-	-	Non-mobilizable
779	CP022518.1	rep_cluster_1441	000782__CP016891_00080	-	-	-	-	-	-	Non-mobilizable
780	CP022519.1	rep_cluster_807	002288__NZ_CM003470_00143	-	-	-	-	MOB_unknown	CP016709	Mobilizable
781	CP022520.1	-	-	-	-	MPF_G	NC_014304_00041,NC_018999_00045,NC_014304_00045,NC_014304_00040,NC_014304_00056	-	-	Non-mobilizable
782	CP022546.1	-	-	-	-	-	-	-	-	Non-mobilizable
783	CP022581.1	rep_cluster_1611	000995__CP022581_00052	-	-	-	-	-	-	Non-mobilizable
784	CP022681.1	-	-	-	-	-	-	-	-	Non-mobilizable
785	CP022703.1	-	-	MOBP	NC_021745_01558	-	-	-	-	Mobilizable
786	CP022716.1	IncQ1	000196__Z74787_00004	-	-	-	-	MOBQ	CU928146	Mobilizable
787	CP023058.1	-	-	MOBQ	NC_010889_00010	-	-	-	-	Mobilizable
788	CP023059.1	-	-	-	-	-	-	-	-	Non-mobilizable
789	CP023060.1	-	-	-	-	-	-	-	-	Non-mobilizable
790	CP023135.2	rep_cluster_1150,IncFIB	000430__CP020850,000107__CP014778_00094	-	-	-	-	-	-	Non-mobilizable
791	CP023246.1	rep_cluster_125	000558__CP013279	-	-	MPF_unknown	NC_018501_00133,NC_017203_00099	-	-	Non-mobilizable
792	CP023428.1	Inc13	000077__AJ577854_00009	MOBV,MOBV	NZ_AKYF01000029_00006,NZ_ANIP01000001_00004	-	-	-	-	Mobilizable
793	CP023447.1	-	-	-	-	-	-	-	-	Non-mobilizable
794	CP023542.1	IncFIB,IncFIIA	000095__NZ_CP014273_00094,000136__AP014877_00014	MOBP	NC_013728_00087	MPF_I	NC_022371_00084,NC_022992_00102,NC_012487_00131,NC_007365_00033,NC_011754_00087,NC_022992_00098,NC_014843_00047,NC_007365_00035,NC_011754_00109	MOBP	FR821780	Conjugative
795	CP023646.1	IncFII,IncFIIA	000121__CP024805,000136__AP014877_00014	MOBP,MOBF	NC_011416_00039,NC_017627_00068	MPF_Unknown	08-5333_00200	-	-	Conjugative
796	CP023647.1	ColRNAI_rep_cluster_1987	000019__CP000651_00005	-	-	-	-	MOBP	AJ001708	Mobilizable
797	CP023648.1	Inc13	000058__CP000643_00001	-	-	-	-	-	-	Non-mobilizable
798	CP023649.1	-	-	MOBQ	NZ_AWFJ01000122_00007	-	-	MOBQ,MOBQ	NZ_CP009767,DQ318958	Mobilizable
799	CP023650.1	ColRNAI_rep_cluster_1857	000008__AJ627566	MOBF	CP019897	-	-	MOB_unknown	NC_003079	Mobilizable
800	CP023651.1	ColRNAI_rep_cluster_1291	000001__EU090225_00001	MOBQ	NC_013719_00001	-	-	-	-	Mobilizable
801	CP023652.1	-	-	-	-	MPF_T	NC_002144_00007	-	-	Non-mobilizable
802	CP023653.1	ColRNAI_rep_cluster_1857	000008__AJ627566	MOBF	CP019897	-	-	MOB_unknown	NC_011407	Mobilizable
803	CP023723.1	IncH,rep_cluster_1150	000137__CP017986_00041,000430__CP020850	MOBH	NC_016980_00239	MPF_F	NC_016980_00110,NC_016980_00099,NC_018107_00101,NC_018107_00235,NC_016980_00109,NC_023911_00309,NC_016980_00240	-	-	Conjugative
804	CP023724.1	IncA/C2	000092__CP025470	MOBH	NC_012885_00072	MPF_F	NC_016974_00085,NC_012885_00091,NC_008612_00190,NC_012885_00083,NC_023291_00077,NC_012885_00167,NC_014170_00023,NC_012885_00088,NC_009140_00071	MOBH	JQ319772	Conjugative
805	CP023725.1	IncFII,IncR,IncN,IncU,IncFIIA	000121__CP024805,000204__CP008701_00115,000155__CP018649,000210__KF623109_00045,000136__AP014877_00014	MOBF	NC_017627_00068	MPF_F	NC_008460_00107	-	-	Conjugative
806	CP023879.1	IncFII,IncFIB	000127__CP009275,000106__CP022118	MOBP,MOBF	NC_021576_00050,NC_021231_00058	MPF_F	NC_014312_00116,NC_021654_00004,NC_021502_00150,NC_023332_00154,NC_019165_00034,NC_021502_00131,NC_014312_00118	-	-	Conjugative
807	CP023880.1	ColRNAI_rep_cluster_1987,rep_cluster_2050	000019__CP000651_00005,001473__CP024541	-	-	-	-	-	-	Non-mobilizable
808	CP023881.1	-	-	-	-	-	-	-	-	Non-mobilizable
809	CP024156.1	IncI2	000147__CP006264_00003	-	-	MPF_T	NC_019039_00052,NC_019039_00065,NC_020270_00058	-	-	Non-mobilizable
810	CP024157.1	IncFIIA,IncFII	000136__AP014877_00014,000121__CP024805	MOBF	NC_017627_00068	MPF_F	NC_008460_00107,NC_010409_00124,NC_019094_00068,NC_022651_00077,NC_017639_00094,NC_019094_00090,NC_014615_00033,NC_013437_00116,NC_018966_00040,NC_007675_00027,NC_017054_00096	-	-	Conjugative
811	CP024158.1	IncFIB	000095__NZ_CP014273_00094	MOBP,MOBF	NC_011416_00039,NC_017627_00068	MPF_Unknown	08-5333_00200	-	-	Conjugative
812	CP024249.1	IncFIB,IncFIIA,IncFII	000095__NZ_CP014273_00094,000136__AP014877_00014,000121__CP024805	MOBP	NC_011416_00039	MPF_F	NC_008460_00107,NC_017639_00094,NC_018966_00040,NC_010409_00124,NC_019094_00090,NC_013437_00116,NC_017054_00096,NC_010488_00021,NC_007675_00027,NC_022651_00077	MOBF	CP019007	Conjugative
813	CP024250.1	IncFIIA,IncFII	000136__AP014877_00014,000121__CP024805	MOBF	NC_022333_00006	MPF_F	NC_022333_00021,NC_007635_00031,NZ_AGTD01000004_00096,NC_022333_00014,NC_021871_00015,NZ_AGTD01000004_00099,NZ_AGTD01000004_00091	-	-	Conjugative
814	CP024467.1	IncX1	000216__CP009767_00121	MOBP	NC_019096_00001	MPF_T	NC_023277_00163,NC_019067_00043,NC_010860_00022,NC_013503_00034,NC_017624_00009	-	-	Conjugative
815	CP024468.1	IncI1	000144__CP015838_00058	MOBP	NC_019097	MPF_I	NC_015965_00072,NC_019097_00085,NC_023290_00086,NC_022267_00069,NC_022267_00057,NC_019097_00075,NC_019111_00038,NZ_CM001473_00069,NC_019097_00056	MOBP	NC_008460	Conjugative
816	CP024469.1	IncFII,IncFIIA	000121__CP024805,000136__AP014877_00014	MOBF	NC_017627_00068	MPF_T	NC_007607_00115	-	-	Conjugative
817	CP024471.1	IncI1	000144__CP015838_00058	MOBP	NC_019097	MPF_I	NC_022267_00069,NZ_CM001473_00069,NC_023290_00086,NC_019097_00085,NC_019097_00075,NC_015965_00072,NC_019111_00038,NC_022267_00057,NC_019097_00056	MOBP	HM021326	Conjugative
818	CP024472.1	IncFIIA,IncFII	000136__AP014877_00014,000121__CP024805	MOBF	NC_017627_00068	-	-	-	-	Mobilizable
819	CP024474.1	IncFIB	000107__CP014778_00094	MOBC	NC_014725_00039	MPF_T	NC_011092_00103,NC_011092_00102,NC_011092_00100	-	-	Conjugative
820	CP024475.1	IncFIIA,IncFII	000136__AP014877_00014,000121__CP024805	MOBF	NC_017627_00068	MPF_F	NC_007675_00027,NC_017639_00094,NC_010409_00124,NC_019094_00068,NC_022651_00077,NC_013437_00116,NC_019094_00090,NC_017054_00096,NC_010719_00097,NC_019037_00027,NC_010719_00096,08-5333_00200	MOBF	CP019842	Conjugative
821	CP024476.1	IncFIIA,IncFII	000136__AP014877_00014,000121__CP024805	MOBF	NC_011980_00044	-	-	-	-	Mobilizable
822	CP024782.1	rep_cluster_324	001639__FN357112_00004	-	-	-	-	-	-	Non-mobilizable
823	CP024783.1	-	-	-	-	-	-	-	-	Non-mobilizable
824	CP024909.1	IncFIB	000102__NC_003385_00128	-	-	-	-	-	-	Non-mobilizable
825	CP024910.1	rep_cluster_1088,IncH	000338__NC_021819,000139__NC_012555_00001	MOBH	NC_012555_00231	MPF_F	NC_005211_00012,NC_005211_00200,NC_009838_00006,NC_005211_00030,NC_005211_00207,NC_005211_00005,NC_021845_00017	MOBH	NC_017484	Conjugative
826	CP024913.1	-	-	-	-	-	-	-	-	Non-mobilizable
827	CP024914.1	-	-	-	-	-	-	-	-	Non-mobilizable
828	CP025075.1	rep_cluster_349	001664__CP006255_00026	-	-	-	-	-	-	Non-mobilizable
829	CP025139.1	IncFIIA,IncFII	000136__AP014877_00014,000121__CP024805	MOBF	NC_017627_00068	MPF_F	NC_007675_00027,NC_013437_00116,NC_017639_00094,NC_017054_00096,NC_008460_00107,NC_019094_00090,NC_022651_00077,NC_018966_00040,NC_019094_00068,NC_010409_00124,08-5333_00200,NC_010719_00097	MOBP	AP014804	Conjugative
830	CP025212.1	IncFIB	000107__CP014778_00094	MOBF	NC_021231_00058	-	-	-	-	Mobilizable
831	CP025213.1	rep_cluster_48,IncR	001837__CP019904_00024,000204__CP008701_00115	-	-	-	-	-	-	Non-mobilizable
832	CP025214.1	IncFII,rep_cluster_1418	000118__KJ958926_00047,000759__NC_013950_00034	MOBP	NC_021198_00256	MPF_I	NC_021198_00230,NC_021198_00240,NC_021198_00238,NC_021198_00249,NC_021198_00235,NC_021198_00236,NC_021198_00243,NC_021198_00234,NC_021198_00239	-	-	Conjugative
833	CP025215.1	IncX3	000221__NC_025130_00012	MOBP	NC_020552_00059	MPF_T	NC_017624_00009,NC_023277_00163,NC_019157_00030,NC_019157_00029,NC_019083_00030	-	-	Conjugative
834	CP025254.1	IncFIIA,IncFII	000136__AP014877_00014,000121__CP024805	MOBF	NC_017627_00068	MPF_F	NC_019094_00068,NC_019094_00090,NC_010409_00124,NC_022651_00077,NC_017639_00094,NC_013437_00116,NC_018966_00040,NC_007675_00027,NC_010719_00097,NC_017054_00096,NC_008460_00107,08-5333_00200	MOBP	AP014804	Conjugative
835	CP025255.1	-	-	MOBP	NZ_CM001473_00092	MPF_I	NZ_CM001473_00071,NZ_CM001473_00073,NZ_CM001473_00075,NZ_CM001473_00080,NZ_CM001473_00091,NZ_CM001473_00070,NZ_CM001473_00074,NZ_CM001473_00064,NZ_CM001473_00069	MOBP	L05392	Conjugative
836	CP025397.1	rep_cluster_1110	000368__GQ900452_00020	MOBQ	NC_002774_00004	-	-	-	-	Mobilizable
837	CP025398.1	rep_cluster_1947	001391__NC_019143_00002	-	-	-	-	-	-	Non-mobilizable
838	CP025497.1	rep_cluster_1017,rep_cluster_1733,rep_cluster_765	000261__GQ900456,001150__NC_013330_00017,002244__NC_013327_00008	-	-	-	-	MOBQ	AF001314	Mobilizable
839	CP025502.1	rep_cluster_1519	000861__DQ366035	-	-	-	-	-	-	Non-mobilizable
840	CP025503.1	rep_cluster_1519	000861__DQ366035	-	-	-	-	-	-	Non-mobilizable
841	CP025504.1	rep_cluster_1519	000861__DQ366035	-	-	-	-	-	-	Non-mobilizable
842	CP025516.1	IncFIB	000107__CP014778_00094	MOBF	NC_021231_00058	MPF_F	NC_019389_00080,NC_019165_00034,NC_021502_00150,NC_014312_00116,NC_014312_00118,NC_021502_00131,NC_021654_00016,NC_014312_00128,NC_014312_00141,NC_022609_00081,NC_021231_00085	-	-	Conjugative
843	CP025517.1	IncR,IncFIA	000204__CP008701_00115,000093__KX023259_00112	-	-	-	-	-	-	Non-mobilizable
844	CP025617.1	rep_cluster_635	002086__LK056645_00077	-	-	-	-	-	-	Non-mobilizable
845	CP025992.1	-	-	-	-	-	-	-	-	Non-mobilizable
846	CP026267.1	-	-	-	-	-	-	-	-	Non-mobilizable
847	CP026636.1	-	-	-	-	-	-	-	-	Non-mobilizable
848	CP026733.1	-	-	MOBP	NC_011416_00039	-	-	-	-	Mobilizable
849	CP026745.1	-	-	MOBP	NC_006362_00119	-	-	-	-	Mobilizable
850	CP026764.1	IncFIB	000107__CP014778_00094	MOBC	NC_014725_00039	MPF_T	NC_011092_00103,NC_011092_00100,NC_011092_00102	-	-	Conjugative
851	CP026771.1	IncFII,IncFIIA	000121__CP024805,000136__AP014877_00014	MOBF	NC_011980_00044	-	-	-	-	Mobilizable
852	CP026775.1	IncFIIA,IncFII	000136__AP014877_00014,000121__CP024805	MOBF	NC_017627_00068	-	-	-	-	Mobilizable
853	CP026779.1	IncFIIA,IncFII	000136__AP014877_00014,000121__CP024805	MOBF	NC_017627_00068	-	-	-	-	Mobilizable
854	CP026783.1	IncFII,IncFIIA	000121__CP024805,000136__AP014877_00014	MOBF	NC_017627_00068	MPF_T	NC_007607_00115	-	-	Conjugative
855	CP026789.1	IncFII,IncFIIA	000123__CP000858,000136__AP014877_00014	MOBF	NC_011980_00044	-	-	-	-	Mobilizable
856	CP026790.1	IncFIA	000093__KX023259_00112	MOBH	NC_013365_00169	MPF_F	NC_009981_00239,NC_019360_00255,NC_002305_00120,NC_002305_00127,NC_019360_00256,NC_005211_00030	-	-	Conjugative
857	CP026791.1	IncFIIA,IncFII	000136__AP014877_00014,000121__CP024805	-	-	-	-	-	-	Non-mobilizable
858	CP026798.1	IncFII,IncFIIA	000121__CP024805,000136__AP014877_00014	MOBF,MOBP	NC_011980_00044,NC_011416_00039	-	-	-	-	Mobilizable
859	CP026800.1	IncFII,IncFIIA	000121__CP024805,000136__AP014877_00014	MOBF	NC_017627_00068	-	-	-	-	Mobilizable
860	CP026806.1	IncFII,IncFIIA	000121__CP024805,000136__AP014877_00014	MOBP,MOBF	NC_011416_00039,NC_011980_00044	MPF_Unknown	08-5333_00200	-	-	Conjugative
861	CP026808.1	rep_cluster_1704	001113__CP011430_00070	-	-	-	-	-	-	Non-mobilizable
862	CP026809.1	IncFIIA,IncFII	000136__AP014877_00014,000121__CP024805	MOBP,MOBF	NC_011416_00039,NC_017627_00068	MPF_Unknown	08-5333_00200	-	-	Conjugative
863	CP026812.1	IncFII,IncFIIA	000121__CP024805,000136__AP014877_00014	MOBP,MOBF	NC_011416_00039,NC_017627_00068	-	-	-	-	Mobilizable
864	CP026813.1	IncFII,IncFIIA	000121__CP024805,000136__AP014877_00014	MOBP,MOBF	NC_011416_00039,NC_017627_00068	MPF_Unknown	08-5333_00200	-	-	Conjugative
865	CP026816.1	rep_cluster_1704	001113__CP011430_00070	-	-	-	-	-	-	Non-mobilizable
866	CP026817.1	IncFIIA,IncFII	000136__AP014877_00014,000121__CP024805	MOBF,MOBP	NC_011980_00044,NC_011416_00039	MPF_Unknown	08-5333_00200	-	-	Conjugative
867	CP026818.1	rep_cluster_1704	001113__CP011430_00070	-	-	-	-	-	-	Non-mobilizable
868	CP026820.1	IncFII,IncFIIA	000121__CP024805,000136__AP014877_00014	MOBF,MOBP	NC_017627_00068,NC_011416_00039	MPF_Unknown	08-5333_00200	-	-	Conjugative
869	CP026821.1	rep_cluster_1704	001113__CP011430_00070	-	-	-	-	-	-	Non-mobilizable
870	CP026822.1	IncFIIA,IncFII	000136__AP014877_00014,000121__CP024805	MOBF,MOBP	NC_017627_00068,NC_011416_00039	MPF_Unknown	08-5333_00200	-	-	Conjugative
871	CP026829.1	IncFII,IncFIIA	000121__CP024805,000136__AP014877_00014	MOBP,MOBF	NC_011416_00039,NC_017627_00068	MPF_Unknown	08-5333_00200	-	-	Conjugative
872	CP026830.1	IncFIB,IncFII,IncFIIA	000101__NZ_CP012345_00042,000121__CP024805,000136__AP014877_00014	MOBF	NC_017627_00068	-	-	-	-	Mobilizable
873	CP026833.1	IncFII,IncFIIA	000121__CP024805,000136__AP014877_00014	MOBF,MOBP	NC_011980_00044,NC_011416_00039	MPF_Unknown	08-5333_00200	-	-	Conjugative
874	CP026835.1	IncFIIA,IncFII	000136__AP014877_00014,000121__CP024805	MOBF,MOBP	NC_017627_00068,NC_011416_00039	MPF_Unknown	08-5333_00200	-	-	Conjugative
875	CP026837.1	IncFII,IncFIIA	000121__CP024805,000136__AP014877_00014	MOBF	NC_011980_00044	MPF_F	NC_022651_00077,NC_010409_00124	MOBF	KT754162	Conjugative
876	CP026838.1	IncFIIA,IncFII	000136__AP014877_00014,000121__CP024805	MOBP,MOBF	NC_011416_00039,NC_017627_00068	MPF_Unknown	08-5333_00200	-	-	Conjugative
877	CP026841.1	IncFII,IncFIIA	000121__CP024805,000136__AP014877_00014	MOBP,MOBF	NC_011416_00039,NC_017627_00068	MPF_Unknown	08-5333_00200	-	-	Conjugative
878	CP026843.1	IncFIIA,IncFII	000136__AP014877_00014,000121__CP024805	MOBP	NC_011416_00039	MPF_Unknown	08-5333_00200	-	-	Conjugative
879	CP026844.1	IncFII,IncFIIA	000121__CP024805,000136__AP014877_00014	MOBF	NC_011980_00044	-	-	-	-	Mobilizable
880	CP026876.1	IncFII,IncFIIA	000121__CP024805,000136__AP014877_00014	MOBF	NC_017627_00068	-	-	-	-	Mobilizable
881	CP026879.1	IncFIIA,IncFII	000136__AP014877_00014,000121__CP024805	MOBF	NC_017627_00068	MPF_T	NC_007607_00115	-	-	Conjugative
882	CP027121.1	rep_cluster_734	002211__NC_010606_00001	MOBF	NC_017163_00021	MPF_F	NC_010606_00079,NC_010606_00078,NC_017163_00053,NC_010606_00071,NZ_AEOY01000095_00077,NC_017163_00052,NC_010606_00076,NC_010606_00075,NC_010606_00080,NC_010606_00072,NC_017163_00020	-	-	Conjugative
883	CP027122.1	-	-	-	-	-	-	-	-	Non-mobilizable
884	CP027124.1	rep_cluster_1172	000454__KY202458_00008	-	-	-	-	-	-	Non-mobilizable
885	CP027128.1	ColRNAI_rep_cluster_1885	000013__DQ995351_00001	-	-	-	-	MOBP	AB027308	Mobilizable
886	CP027130.1	IncFIB,IncFIIA,IncFIA,IncFII	000095__NZ_CP014273_00094,000136__AP014877_00014,000094__NZ_CP015070_00117,000121__CP024805	MOBF	NC_017627_00068	MPF_F	08-5333_00200,NC_010719_00096,NC_010409_00124,NC_013437_00116,NC_010488_00021,NC_017639_00094,NC_014615_00033,NC_007675_00027,NC_018966_00040,NC_022651_00077,NC_019094_00090,NC_017054_00096	MOBF	FN868248	Conjugative
887	CP027131.1	ColRNAI_rep_cluster_1885	000013__DQ995351_00001	-	-	-	-	MOBP,MOB_unknown	AB027308,CP018359	Mobilizable
888	CP027132.1	Inc13	000058__CP000643_00001	-	-	-	-	-	-	Non-mobilizable
889	CP027137.1	IncN	000151__NC_019163_00001	MOBF	NC_015872_00034	MPF_T	NC_015872_00011,NC_015872_00006,NC_015872_00005,NC_015872_00010,NC_015872_00007	-	-	Conjugative
890	CP027144.1	IncH,rep_cluster_1088,IncP	000139__NC_012555_00001,000338__NC_021819,000164__NC_022344_00310	MOBP,MOBH	NC_022344_00316,NC_012555_00231	MPF_F	NC_021845_00017,NC_005211_00030,NC_015727_00490,NC_005211_00005,NC_022344_00321,NC_005211_00207,NC_005211_00200,NC_022344_00330,NC_005211_00012,NC_009838_00006,NC_022344_00326	MOBH	NC_017484	Conjugative
891	CP027145.1	IncR,IncFII	000207__CP025517,000135__NC_014107_00001	MOBF	NC_014107_00160	MPF_F	NC_014107_00135,NC_014107_00159,NC_009425_00108,NC_014107_00146,NC_014107_00145,NC_014107_00127,NC_014107_00126,NC_014107_00125,NC_014107_00137,NC_014107_00154,NC_014107_00139	-	-	Conjugative
892	CP027152.1	IncFII,IncFIB,IncFII	000113__CP022035,000107__CP014778_00094,000132__HG969996	MOBF	NC_021231_00058	MPF_F	NC_022609_00081,NC_019165_00034,NC_019155_00032,NC_019389_00080,NC_023332_00154,NC_021654_00016,NC_021502_00150,NC_014312_00128,NC_021654_00004,NC_014312_00118,NC_021502_00131,NC_014312_00116	-	-	Conjugative
893	CP027158.1	IncFIB,IncFII,IncFII	000097__NC_025166_00051,000130__CP023489,000113__CP022035	MOBF	NC_021231_00058	MPF_F	NC_014312_00116,NC_021502_00150,NC_022609_00081,NC_019165_00034,NC_019389_00080,NC_023905_00125,NC_023332_00154,NC_014312_00118,NC_014312_00128,NC_021654_00016,NC_019389_00068,NC_021502_00131	-	-	Conjugative
894	CP027161.1	IncFIB,IncFII,IncFII	000107__CP014778_00094,000132__HG969996,000113__CP022035	MOBF	NC_021231_00058	MPF_F	NC_014312_00116,NC_021654_00016,NC_022609_00081,NC_019389_00080,NC_019165_00034,NC_023332_00154,NC_014312_00118,NC_019155_00032,NC_021502_00150,NC_021654_00004,NC_021502_00131,NC_014312_00128	-	-	Conjugative
895	CP027167.1	IncP	000163__NC_011838_00078	MOBP	NC_011838_00155	MPF_F	NC_014124_00051,NC_004444_00184,NC_014124_00060,NC_014124_00046,NC_014124_00052,NC_014124_00054,NC_014124_00058	-	-	Conjugative
896	CP027168.1	rep_cluster_688	002152__NC_019906_00045	MOBF	NC_019906_00069	MPF_T	NC_019906_00068	-	-	Conjugative
897	CP027170.1	IncP,rep_cluster_1115	000186__NC_014621_00248,000375__CP015879_00037	-	-	MPF_T	NC_022344_00497,NC_022344_00487	-	-	Non-mobilizable
898	CP027173.1	rep_cluster_573	001974__KR014105_00003	-	-	-	-	-	-	Non-mobilizable
899	CP027179.1	-	-	MOBP	NZ_AEOY01000096_00007	-	-	-	-	Mobilizable
900	CP027180.1	rep_cluster_1226	000523__LT594096_00001	MOBQ	NC_006877_00013	-	-	-	-	Mobilizable
901	CP027181.1	-	-	MOBP	NZ_AFDA02000006_00006	-	-	MOBP	NC_013366	Mobilizable
902	CP027182.1	rep_cluster_718	002191__CP004359_00001	MOBP,MOBP	NZ_AEOY01000096_00007,NZ_ALIG01000010_00048	-	-	-	-	Mobilizable
903	CP027184.1	-	-	MOBP	NZ_AEOY01000096_00007	-	-	-	-	Mobilizable
904	CP027185.1	rep_cluster_718	002191__CP004359_00001	MOBP,MOBP	NZ_AEOY01000096_00007,NZ_ALIG01000010_00048	-	-	-	-	Mobilizable
905	CP027187.1	-	-	MOBP	NZ_AFDA02000006_00006	-	-	MOBP	NC_013366	Mobilizable
906	CP027364.1	IncFIIA,IncFIB,IncFII	000136__AP014877_00014,000096__NC_019117_00097,000121__CP024805	MOBP	NC_011416_00039	MPF_T	NC_007607_00115	-	-	Conjugative
907	CP027377.1	IncFII,IncFIIA	000121__CP024805,000136__AP014877_00014	MOBF	NC_017627_00068	MPF_F	NZ_CM001154_00091,NC_007675_00027,NC_019037_00027,NC_017639_00094,08-5333_00200,NC_017054_00096,NC_019094_00090,NC_010719_00097,NC_019094_00068	MOBP	NZ_CM001472	Conjugative
908	CP027379.1	IncFIIA	000136__AP014877_00014	-	-	MPF_I	NC_012487_00131,NC_022371_00084,NC_022992_00102,NC_011754_00109,NC_007365_00035	MOBP	CP018984	Mobilizable
909	CP027485.1	IncQ1,IncFII,IncFIB,IncFIIA	000195__NC_013728_00014,000121__CP024805,000095__NZ_CP014273_00094,000136__AP014877_00014	MOBF,MOBP	NC_011980_00044,NC_011416_00039	MPF_F	NC_014615_00033,08-5333_00200,NC_010488_00021,NC_010719_00096,NC_007675_00027,NC_018966_00040,NC_019094_00090,NC_017054_00096,NC_010409_00124	MOBF	CP016042	Conjugative
910	CP027641.1	IncFIIA,ColRNAI_rep_cluster_1857,IncFII,IncFIB	000136__AP014877_00014,000008__AJ627566,000121__CP024805,000095__NZ_CP014273_00094	MOBF	NC_011980_00044	MPF_F	NC_019094_00068,NC_010719_00096,NC_007675_00027,NC_013121_00043,NC_010719_00097,08-5333_00200,NC_017054_00096,NC_022651_00077	MOBF	NZ_CP016039	Conjugative
911	CP027674.1	IncFII,IncFIB,ColRNAI_rep_cluster_1857,IncFIIA	000121__CP024805,000095__NZ_CP014273_00094,000008__AJ627566,000136__AP014877_00014	MOBF	NC_017627_00068	MPF_F	NC_010409_00124,NC_007675_00027,NC_017639_00094,NC_013437_00116,NC_019037_00027,NC_022651_00077,08-5333_00200,NC_019094_00068,NC_017054_00096,NC_008460_00107,NC_019094_00090	MOBF	CP015086	Conjugative
912	CP027765.1	IncFIIA,IncFII	000136__AP014877_00014,000121__CP024805	MOBF	NC_011980_00044	MPF_F	NC_019094_00068,NC_010409_00124,NC_017054_00096,08-5333_00200,NC_010719_00097,NC_019037_00027,NC_010719_00096,NC_017639_00094,NC_022651_00077	-	-	Conjugative
913	CP028380.1	IncI1,IncFIB	000145__HE610900_00001,000095__NZ_CP014273_00094	MOBP,MOBP	NC_013728_00087,NC_011416_00039	-	-	MOBP	CP018984	Mobilizable
914	CP028556.1	-	-	-	-	-	-	-	-	Non-mobilizable
915	CP028557.1	rep_cluster_1233	000541__DQ278485_00001	-	-	-	-	-	-	Non-mobilizable
916	CP028558.1	rep_cluster_1172	000453__KU549174_00001	-	-	-	-	-	-	Non-mobilizable
917	CP028559.1	-	-	MOBP	NZ_AFDA02000006_00006	-	-	MOBP	NC_013362	Mobilizable
918	CP028560.1	rep_cluster_1218,rep_cluster_639	000512__CP014652_00146,002092__CU459140_00002	MOBP,MOBP	NZ_ALIG01000010_00048,NZ_AEOY01000096_00007	-	-	-	-	Mobilizable
919	CP028705.1	IncX3	000221__NC_025130_00012	MOBP	NC_020552_00059	MPF_T	NC_019157_00030,NC_019157_00029,NC_017624_00009,NC_019083_00030,NC_023277_00163	-	-	Conjugative
920	CP028916.1	rep_cluster_1150,IncFIB,IncH	000430__CP020850,000107__CP014778_00094,000137__CP017986_00041	-	-	-	-	-	-	Non-mobilizable
921	CP029162.1	rep_cluster_1374	000709__CP009254_00003	-	-	-	-	-	-	Non-mobilizable
922	CP029163.1	-	-	-	-	-	-	-	-	Non-mobilizable
923	CP029444.1	ColRNAI_rep_cluster_1987	000019__CP000651_00005	MOBP	NC_013090_00004	-	-	MOBP	CP018941	Mobilizable
924	CP029445.1	ColRNAI_rep_cluster_1987	000019__CP000651_00005	-	-	-	-	MOBP	NC_019134	Mobilizable
925	CP029446.1	IncX5,IncU	000225__CP011639_00001,000211__KU963389_00011	MOBP	NC_019096_00001	MPF_T	NC_019899_00039,NC_019899_00038,NC_019899_00040,NC_019899_00035	-	-	Conjugative
926	CP029447.1	IncL/M	000148__NC_021488_00028	-	-	MPF_I	NC_004464_00105,NC_019063_00094,NC_005246_00057,NC_004464_00068,NC_019154_00069,NC_019344_00078,NC_004464_00066,NC_004464_00073,NC_005246_00069	-	-	Non-mobilizable
927	CP029448.1	IncFII,IncFIB,IncFII	000128__CP023916,000107__CP014778_00094,000113__CP022035	MOBF	NC_021231_00058	MPF_F	NC_021502_00131,NC_019165_00034,NC_021502_00150,NC_014312_00118,NC_014312_00116,NC_014312_00128,NC_023332_00154,NC_022609_00081	-	-	Conjugative
928	CP029656.1	rep_cluster_1017,rep_cluster_1017,rep_cluster_1215	000251__CP007673_00019,000261__GQ900456,000509__NC_016643_00001	-	-	-	-	MOBV	CP002151	Mobilizable
929	CP029661.1	rep_cluster_1018,rep_cluster_1017,rep_cluster_1110	000268__U32369_00002,000261__GQ900456,000368__GQ900452_00020	MOBV	NC_022618_00010	-	-	-	-	Mobilizable
930	CP029662.1	rep_cluster_1017,rep_cluster_1017,rep_cluster_1215	000261__GQ900456,000251__CP007673_00019,000509__NC_016643_00001	-	-	-	-	MOBV	CP002151	Mobilizable
931	CP029665.1	rep_cluster_1017,rep_cluster_1733	000261__GQ900456,001150__NC_013330_00017	-	-	-	-	MOBQ	AF001314	Mobilizable
932	CP029670.1	rep_cluster_1215,rep_cluster_1017,rep_cluster_1017	000509__NC_016643_00001,000251__CP007673_00019,000261__GQ900456	-	-	-	-	MOBV	CP002151	Mobilizable
933	CP029672.1	rep_cluster_1215,rep_cluster_1017,rep_cluster_1017	000509__NC_016643_00001,000261__GQ900456,000251__CP007673_00019	-	-	-	-	MOBV	CP002151	Mobilizable
934	CP029690.1	IncFIA	000093__KX023259_00112	MOBP,MOBH	NC_011416_00039,NC_013365_00169	MPF_F	NC_019360_00255,NC_019360_00278,NC_009981_00239,NC_019360_00256,NC_002305_00120,NC_002305_00127,NC_005211_00030	-	-	Conjugative
935	CP029691.1	IncFII,IncFIIA	000121__CP024805,000136__AP014877_00014	MOBP,MOBF	NC_011416_00039,NC_017627_00068	MPF_F	08-5333_00200,NC_019094_00090,NC_022651_00077,NC_010409_00124	MOBF	AF197335	Conjugative
936	CP029717.1	IncH,rep_cluster_1088	000139__NC_012555_00001,000338__NC_021819	MOBH	NC_012555_00231	MPF_F	NC_021845_00017,NC_005211_00012,NC_005211_00030,NC_009838_00006,NC_005211_00207,NC_005211_00005	MOBH	NC_017484	Conjugative
937	CP029718.1	IncA/C2	000092__CP025470	MOBH	NC_012885_00072	MPF_F	NC_012885_00088,NC_023291_00077,NC_012885_00083,NC_009140_00071,NC_014170_00023,NC_016974_00085,NC_012885_00091,NC_012885_00167	MOBH	AB040037	Conjugative
938	CP029719.1	IncFIB,IncFII	000108__NC_014107_00054,000135__NC_014107_00001	MOBF	NC_014107_00160	MPF_F	NC_014107_00127,NC_014107_00145,NC_014107_00154,NC_014107_00146,NC_014107_00125,NC_014107_00139,NC_014107_00147,NC_009425_00108,NC_014107_00126,NC_014107_00137,NC_014107_00135	-	-	Conjugative
939	CP029720.1	IncL/M	000148__NC_021488_00028	MOBP	NC_004464_00056	MPF_I	NC_004464_00105,NC_005246_00057,NC_019063_00094,NC_004464_00073,NC_019154_00069,NC_019344_00078,NC_004464_00068,NC_005246_00069,NC_004464_00066	-	-	Conjugative
940	CP029721.1	IncR	000207__CP025517	-	-	-	-	-	-	Non-mobilizable
941	CP029723.1	IncFIB,IncFII,rep_cluster_1418,IncR,IncFII	000097__NC_025166_00051,000130__CP023489,000759__NC_013950_00034,000204__CP008701_00115,000113__CP022035	MOBF	NC_021231_00058	-	-	-	-	Mobilizable
942	CP029724.1	IncFII,IncFIB,IncFII	000129__CP018340,000107__CP014778_00094,000114__CP015527	MOBF	NC_021231_00058	MPF_F	NC_019165_00034,NC_021502_00150,NC_014312_00128,NC_023332_00154,NC_019155_00032,NC_021654_00016,NC_021502_00131,NC_011281_00082,NC_014312_00118,NC_019389_00068,NC_022609_00081,NC_014312_00116	-	-	Conjugative
943	CP029726.1	rep_cluster_1159	000437__KT351737_00006	-	-	-	-	-	-	Non-mobilizable
944	CP029728.1	IncX4	000224__NC_022105_00002	MOBP	NC_013718_00057	MPF_T	NC_013718_00044,NC_013718_00045,NC_021079_00038	-	-	Conjugative
945	CP029729.1	rep_cluster_1254	000562__KT346360_00001	MOBH	NC_013365_00169	MPF_F	NC_002305_00120,NC_019360_00255,NC_019360_00278,NC_019360_00256,NC_005211_00030,NC_002305_00127,NC_009981_00239	-	-	Conjugative
946	CP029730.1	IncP,IncA/C2	000164__NC_022344_00310,000092__CP025470	MOBH,MOBP	NC_012885_00072,NC_022344_00316	MPF_T	NC_022344_00326,NC_015727_00490,NC_022344_00321,NC_012885_00167,NC_022344_00330	MOBH	AB040037	Conjugative
947	CP029731.1	IncFII,IncFII,IncFIB	000122__JQ418538,000114__CP015527,000101__NZ_CP012345_00042	MOBF	NC_021501_00073	MPF_F	NC_021501_00085,NC_021501_00097,NC_021501_00076,NC_021501_00074,NC_021501_00083,NC_006323_00105,NC_006323_00097,NC_021501_00084,NC_006323_00113,NC_009378_00101,NC_006323_00096	-	-	Conjugative
948	CP029732.1	IncFII,IncFII	000114__CP015527,000122__JQ418538	MOBF	NC_019125_00139	MPF_F	NC_019342_00058,NZ_AGTD01000004_00094,NC_021871_00021,NC_021871_00019,NC_021871_00022,NC_021817_00013,NZ_AGTD01000004_00091,NC_019125_00135,NC_019342_00064,NC_021871_00015	-	-	Conjugative
949	CP029733.1	rep_cluster_1444	000786__KP987215_00001	-	-	-	-	MOB_unknown	NC_017627	Mobilizable
950	CP029734.1	IncFIIA,IncFII	000136__AP014877_00014,000121__CP024805	MOBF	NC_017627_00068	MPF_F	NC_017639_00094,NC_019072_00073,NC_010719_00097,NC_013437_00116,NC_022651_00077,NC_008460_00107,NC_018966_00040,NC_010409_00124,NC_017054_00096,NC_007675_00027,NC_019094_00068	MOBP	AP014804	Conjugative
951	CP029735.1	IncX3	000221__NC_025130_00012	MOBP	NC_020552_00059	MPF_T	NC_023277_00163,NC_019157_00030,NC_019157_00029,NC_017624_00009,NC_019083_00030	-	-	Conjugative
952	CP029737.1	IncA/C2	000092__CP025470	MOBH	NC_012885_00072	MPF_F	NC_012885_00088,NC_012885_00167,NC_016974_00085,NC_023291_00077,NC_009140_00071,NC_014170_00023,NC_012885_00083,NC_012885_00091	MOBH	AB040037	Conjugative
953	CP029739.1	IncU,IncFIB,rep_cluster_1150	000212__CP012556_00176,000107__CP014778_00094,000430__CP020850	-	-	-	-	-	-	Non-mobilizable
954	CP029740.1	IncFII,IncFII,rep_cluster_1418	000113__CP022035,000130__CP023489,000759__NC_013950_00034	MOBF	NC_021231_00058	MPF_F	NC_014312_00116,NC_023905_00125,NC_023332_00154,NC_021654_00016,NC_014312_00128,NC_019165_00034,NC_019389_00080,NC_022609_00081,NC_021502_00150,NC_019389_00068,NC_014312_00118,NC_021502_00131	-	-	Conjugative
955	CP029742.1	IncFIIA	000136__AP014877_00014	MOBP,MOBP	NC_011416_00039,NC_013728_00087	MPF_I	NC_014843_00033,NC_011754_00109,NC_011754_00087,NC_012487_00131,NC_022371_00084,NC_014843_00047,NC_007365_00033,NC_022992_00098,NC_007365_00035	MOBP	FR821780	Conjugative
956	CP029743.1	IncA/C2	000092__CP025470	MOBH	NC_012885_00072	MPF_F	NC_009140_00071,NC_016974_00085,NC_012885_00083,NC_014170_00023,NC_012885_00167	MOBH	JQ319772	Conjugative
957	CP029744.1	IncFIB,IncFII,IncFIIA	000095__NZ_CP014273_00094,000121__CP024805,000136__AP014877_00014	MOBF	NC_017627_00068	MPF_F	08-5333_00200,NC_010488_00021,NC_008460_00107,NC_017639_00094,NC_010409_00124,NC_022651_00077,NC_017054_00096,NC_007675_00027,NC_014615_00033,NC_018966_00040,NC_013437_00116,NC_019094_00090	MOBF	DQ286390	Conjugative
958	CP029748.1	IncFIIA,rep_cluster_1088,IncFIB,IncFII,IncN	000136__AP014877_00014,000340__KU353730,000095__NZ_CP014273_00094,000121__CP024805,000155__CP018649	MOBP,MOBF	NC_011416_00039,NC_017627_00068	MPF_F	NC_010488_00021,NC_010409_00124,NC_007675_00027,NC_005211_00030,NC_018966_00040,NC_019094_00090,NC_013437_00116,NC_022651_00077,08-5333_00200,NC_017639_00094,NC_014615_00033,NC_009838_00006,NC_008460_00107,NC_005211_00012,NC_017054_00096,NC_021845_00017	MOBF	FN868248	Conjugative
959	CP029779.1	rep_cluster_2050,ColRNAI_rep_cluster_1987	001473__CP024541,000019__CP000651_00005	-	-	-	-	-	-	Non-mobilizable
960	CU468231.1	rep_cluster_1280	000595__CU468231_00001	-	-	-	-	-	-	Non-mobilizable
961	CU468232.1	rep_cluster_955,rep_cluster_1364	002437__CU468232_00025,000682__CU468232_00001	-	-	-	-	-	-	Non-mobilizable
962	CU468233.1	rep_cluster_1357,rep_cluster_1219	000676__CU468233_00017,000513__CU468233_00001	-	-	-	-	-	-	Non-mobilizable
963	CU928147.1	IncFIIA,ColRNAI_rep_cluster_1291	000136__AP014877_00014,000002__NC_009781	MOBP,MOBP	NC_013728_00087,NC_011416_00039	MPF_I	NC_011754_00109,NC_007365_00035,NC_022992_00098,NC_011754_00087,NC_014843_00047,NC_012487_00131,NC_014843_00041,NC_014843_00033,NC_022371_00084	MOBP	NZ_CM001146	Conjugative
964	CU928148.1	ColRNAI_rep_cluster_1291,IncFIIA,IncFII,IncFIB	000002__NC_009781,000136__AP014877_00014,000121__CP024805,000096__NC_019117_00097	MOBF	NC_017627_00068	MPF_F	NC_022651_00077,NC_008460_00107,NC_007675_00027,NC_010409_00124,NC_017630_00031,NC_013437_00116,NC_019094_00068,NC_010719_00097,NC_018966_00040,08-5333_00200,NC_017054_00096,NC_019094_00090	MOBF	NC_010600	Conjugative
965	CU928149.1	IncX1	000216__CP009767_00121	MOBP	NC_019096_00001	MPF_T	NC_017624_00009,NC_023277_00163,NC_013503_00034,NC_019067_00043,NC_010860_00022	-	-	Conjugative
966	CU928159.2	IncFII,IncFIB,IncI1	000121__CP024805,000095__NZ_CP014273_00094,000144__CP015838_00058	-	-	MPF_F	NC_010409_00124,NC_022651_00077,NC_019000_00022	MOBP	NC_021077	Mobilizable
967	DQ011112.1	-	-	-	-	-	-	-	-	Non-mobilizable
968	DQ011664.1	rep_cluster_1186	000469__NC_007068_00002	-	-	-	-	-	-	Non-mobilizable
969	DQ017661.1	IncI1	000145__HE610900_00001	MOBP	NC_019097	MPF_I	NZ_CM001473_00069,NC_019111_00038,NC_022267_00069,NC_015965_00072,NC_019097_00085,NC_023290_00086,NC_019097_00056,NC_019097_00075,NC_022267_00057	MOBP	HM021326	Conjugative
970	DQ058764.1	rep_cluster_490,rep_cluster_553	001856__NC_002147_00021,001927__CP016451_00026	MOBQ	NC_010929_00217	MPF_T	NC_011984_00206,NC_010929_00150,NC_002377_00179,NC_010929_00147,NC_002377_00157,NC_010929_00214,NC_011990_00129,NC_010929_00153,NC_002377_00161	-	-	Conjugative
971	DQ063224.1	-	-	-	-	-	-	-	-	Non-mobilizable
972	DQ063226.1	-	-	-	-	-	-	-	-	Non-mobilizable
973	DQ069059.1	-	-	-	-	-	-	-	-	Non-mobilizable
974	DQ089807.2	rep_cluster_554	001941__DQ089807_00009	-	-	-	-	-	-	Non-mobilizable
975	DQ099911.1	rep_cluster_1299,rep_cluster_1956	000616__NC_019233_00001,001400__NC_019219_00001	MOBP	NC_019219_00005	-	-	-	-	Mobilizable
976	DQ103758.1	rep_cluster_330	001644__DQ103758_00002	-	-	-	-	-	-	Non-mobilizable
977	DQ115387.2	IncX1	000217__NC_019106_00041	MOBP	NC_019096_00001	MPF_T	NC_023277_00163,NC_019067_00043,NC_019046_00026,NC_017624_00009	-	-	Conjugative
978	DQ115388.2	IncFII,IncX1	000114__CP015527,000217__NC_019106_00041	MOBP,MOBF	NC_019096_00001,NC_017627_00068	MPF_T	NC_013503_00034,NC_017624_00009,NC_019067_00043,NC_023277_00163,NC_010860_00022	-	-	Conjugative
979	DQ116709.1	rep_cluster_689	002153__AB370335_00002	MOBV	NC_016034_00003	-	-	-	-	Mobilizable
980	DQ119295.1	-	-	-	-	-	-	-	-	Non-mobilizable
981	DQ119297.1	-	-	-	-	-	-	-	-	Non-mobilizable
982	DQ126685.1	rep_cluster_688	002152__NC_019906_00045	MOBF	NC_019906_00069	MPF_T	NC_019906_00068	-	-	Conjugative
983	DQ140180.1	-	-	-	-	-	-	-	-	Non-mobilizable
984	DQ140187.1	ColRNAI_rep_cluster_1991	000022__NC_015392	MOBV,MOBV	NC_022531_00004,NC_005311_00009	-	-	-	-	Mobilizable
985	DQ145546.1	rep_cluster_546	001918__NC_013545_00001	MOBQ	NC_013545_00086	MPF_T	NC_016813_00008	-	-	Conjugative
986	DQ149242.1	rep_cluster_554	001936__L02920	MOB_Unknown	JQ821353	-	-	MOBP	KU302809	Mobilizable
987	DQ149243.1	rep_cluster_414,rep_cluster_554	001738__NC_017495_00001,001929__CP016741	-	-	-	-	-	-	Non-mobilizable
988	DQ149244.1	rep_cluster_554,rep_cluster_667	001939__AJ550509_00002,002127__CP016693_00001	MOBQ	NC_017478_00010	-	-	-	-	Mobilizable
989	DQ149245.1	rep_cluster_633,rep_cluster_570	002082__CP016686_00001,001971__CP016721_00001	-	-	-	-	MOBP	NC_005205	Mobilizable
990	DQ173493.1	rep_cluster_1855	001285__NC_010260_00002	-	-	-	-	-	-	Non-mobilizable
991	DQ176855.1	rep_cluster_982	002466__KR262062_00008	MOBQ	NC_013546_00003	-	-	MOBQ	CP021910	Mobilizable
992	DQ185139.1	rep_cluster_1434	000776__NC_019227	-	-	-	-	-	-	Non-mobilizable
993	DQ185143.1	rep_cluster_1434	000775__NC_017213	-	-	-	-	-	-	Non-mobilizable
994	DQ186900.1	rep_cluster_1876	001312__DQ186900	-	-	-	-	-	-	Non-mobilizable
995	DQ198799.1	rep_cluster_137	000691__NC_020556_00001	MOBP	NC_014257_00004	-	-	-	-	Mobilizable
996	DQ220741.1	Inc18	000086__KY579372_00014	-	-	-	-	-	-	Non-mobilizable
997	DQ223897.1	rep_cluster_1375	000711__NC_010867_00005	-	-	-	-	-	-	Non-mobilizable
998	DQ223898.1	-	-	-	-	-	-	-	-	Non-mobilizable
999	DQ223899.1	-	-	-	-	-	-	-	-	Non-mobilizable
1000	DQ227323.1	rep_cluster_1814	001234__NC_010888_00004	-	-	-	-	-	-	Non-mobilizable
1001	DQ227324.1	rep_cluster_1814	001234__NC_010888_00004	-	-	-	-	-	-	Non-mobilizable
1002	DQ227325.1	rep_cluster_1814	001234__NC_010888_00004	-	-	-	-	-	-	Non-mobilizable
1003	DQ227326.1	rep_cluster_1814	001234__NC_010888_00004	-	-	-	-	-	-	Non-mobilizable
1004	DQ227327.1	-	-	-	-	-	-	-	-	Non-mobilizable
1005	DQ229163.1	-	-	-	-	-	-	-	-	Non-mobilizable
1006	DQ229164.1	rep_cluster_1433	000772__DQ229166_00005	-	-	-	-	-	-	Non-mobilizable
1007	DQ229165.1	rep_cluster_1749	001169__DQ229165_00001	-	-	-	-	-	-	Non-mobilizable
1008	DQ229166.1	rep_cluster_1433	000772__DQ229166_00005	-	-	-	-	-	-	Non-mobilizable
1009	DQ239897.1	rep_cluster_137	000695__DQ239897_00001	MOBP	NC_013547_00007	-	-	-	-	Mobilizable
1010	DQ268764.2	rep_cluster_995	002480__NC_019220_00009	MOBF	NC_019262_00003	-	-	-	-	Mobilizable
1011	DQ278485.1	rep_cluster_1233	000541__DQ278485_00001	-	-	-	-	-	-	Non-mobilizable
1012	DQ278486.1	rep_cluster_1283	000602__DQ278486_00001	MOBQ	NC_010310_00017	-	-	-	-	Mobilizable
1013	DQ286390.1	ColRNAI_rep_cluster_1857	000008__AJ627566	-	-	-	-	MOBP,MOB_unknown	CP018844,NC_019986	Mobilizable
1014	DQ286581.1	rep_cluster_1152	000433__CP002796_00002	MOBQ	NC_010164_00006	-	-	-	-	Mobilizable
1015	DQ288662.1	rep_cluster_1901	001337__NC_013783_00002	-	-	-	-	-	-	Non-mobilizable
1016	DQ288663.1	-	-	-	-	-	-	-	-	Non-mobilizable
1017	DQ295022.1	rep_cluster_59	002014__DQ295022_00001	-	-	-	-	-	-	Non-mobilizable
1018	DQ298019.1	ColRNAI_rep_cluster_1857	000003__NC_002119_00001	MOBC	NC_009793_00003	-	-	-	-	Mobilizable
1019	DQ302475.1	-	-	-	-	-	-	-	-	Non-mobilizable
1020	DQ305402.1	rep_cluster_1152,rep_cluster_1320	000433__CP002796_00002,000639__NC_015053_00005	MOBQ	NC_011332_00003	-	-	-	-	Mobilizable
1021	DQ311641.1	rep_cluster_1778	001203__CP012629_00001	MOBQ	NC_011411_00002	-	-	MOBQ,MOBQ	NC_009791,NC_013503	Mobilizable
1022	DQ318776.1	rep_cluster_701	002168__DQ318776	-	-	-	-	-	-	Non-mobilizable
1023	DQ318777.1	rep_cluster_594	002025__DQ318777	-	-	-	-	-	-	Non-mobilizable
1024	DQ318958.1	ColRNAI_rep_cluster_1987	000019__CP000651_00005	-	-	-	-	MOBP	HQ328804	Mobilizable
1025	DQ322649.1	rep_cluster_1554	000922__DQ322649_00028	-	-	-	-	-	-	Non-mobilizable
1026	DQ322650.2	-	-	-	-	-	-	-	-	Non-mobilizable
1027	DQ322651.1	rep_cluster_1879,rep_cluster_1910	001314__CP003276_00049,001348__DQ322651_00009	-	-	-	-	-	-	Non-mobilizable
1028	DQ363750.1	rep_cluster_1721,rep_cluster_169	001137__CP004861,001091__NC_009841_00034	-	-	MPF_T	NC_020382_00070,NC_009841_00055	-	-	Non-mobilizable
1029	DQ364061.1	rep_cluster_30	001609__DQ364061_00005	-	-	-	-	-	-	Non-mobilizable
1030	DQ364638.1	IncFIIA,IncFII	000136__AP014877_00014,000121__CP024805	MOBF	NC_017627_00068	MPF_F	NC_013437_00116,NC_008460_00107,NC_018966_00040,NC_007675_00027,NC_022651_00077,NC_017054_00096,08-5333_00200,NC_019094_00090,NC_017639_00094,NC_010719_00097,NC_019094_00068,NC_010409_00124	MOBP	AP014804	Conjugative
1031	DQ366035.1	rep_cluster_1519	000861__DQ366035	-	-	-	-	-	-	Non-mobilizable
1032	DQ367664.1	rep_cluster_1827	001247__NC_010875_00002	MOBV	NC_010875_00006	-	-	-	-	Mobilizable
1033	DQ388534.1	IncFIIA,IncFIB,IncFII	000136__AP014877_00014,000101__NZ_CP012345_00042,000121__CP024805	MOBF	NC_017627_00068	MPF_F	NC_018966_00040,NC_013437_00116,NC_010488_00021,NC_017054_00096,NC_019094_00090,08-5333_00200,NC_010409_00124,NC_014615_00033,NC_022651_00077,NC_017639_00094,NC_007675_00027,NC_010719_00096	-	-	Conjugative
1034	DQ390454.1	IncN	000155__CP018649	MOBF	NC_015599_00019	MPF_T	NC_011617_00041,NC_014368_00014,NC_009131_00030,NC_022375_00024,NC_008612_00190,NC_007682_00044	MOBF	NZ_CP013027	Conjugative
1035	DQ390456.1	rep_cluster_1110	000371__DQ390456_00046	-	-	-	-	-	-	Non-mobilizable
1036	DQ390457.1	rep_cluster_1179	000461__NC_009129_00017	MOBF	NC_009129_00019	-	-	-	-	Mobilizable
1037	DQ390458.1	-	-	MOBF	NC_009128_00017	-	-	-	-	Mobilizable
1038	DQ399903.1	-	-	-	-	-	-	-	-	Non-mobilizable
1039	DQ399904.1	-	-	MOBF	NC_013779_00015	-	-	-	-	Mobilizable
1040	DQ401103.1	IncU	000211__KU963389_00011	MOBP	NC_006143_00014	MPF_T	NC_006143_00018,NC_006143_00021,NC_006143_00028,NC_006143_00022,NC_006143_00024,NC_006143_00027	-	-	Conjugative
1041	DQ402049.1	ColRNAI_rep_cluster_1987	000019__CP000651_00005	MOBP	NC_001848_00006	-	-	MOBP	NZ_HG941720	Mobilizable
1042	DQ438984.1	-	-	MOBV	NC_013539_00005	-	-	-	-	Mobilizable
1043	DQ438985.1	rep_cluster_631	002081__DQ438985_00002	-	-	-	-	-	-	Non-mobilizable
1044	DQ458910.1	rep_cluster_1152	000433__CP002796_00002	MOBQ	NC_011332_00003	-	-	-	-	Mobilizable
1045	DQ458911.1	rep_cluster_1351	000669__NC_004252_00011	MOBQ	NC_015066_00001	-	-	-	-	Mobilizable
1046	DQ459356.1	-	-	-	-	-	-	-	-	Non-mobilizable
1047	DQ459357.1	-	-	-	-	-	-	-	-	Non-mobilizable
1048	DQ460733.1	IncQ2	000201__KJ631731_00005	MOBF	NC_019262_00003	-	-	-	-	Mobilizable
1049	DQ497626.1	-	-	-	-	-	-	-	-	Non-mobilizable
1050	DQ499634.2	rep_cluster_1908	001344__NC_015189	MOBQ	NC_008691_00001	-	-	-	-	Mobilizable
1051	DQ517426.1	rep_cluster_1582	000958__NC_010889_00001	MOBQ	NC_010889_00010	-	-	-	-	Mobilizable
1052	DQ518170.1	-	-	-	-	-	-	-	-	Non-mobilizable
1053	DQ518171.1	rep_cluster_896	002376__NC_008050_00001	-	-	-	-	-	-	Non-mobilizable
1054	DQ518172.1	rep_cluster_795	002269__NC_008052_00001	MOBP	NC_008051_00004	-	-	-	-	Mobilizable
1055	DQ518173.1	rep_cluster_795	002269__NC_008052_00001	MOBP	NC_008051_00004	-	-	-	-	Mobilizable
1056	DQ534432.1	rep_cluster_571	001973__NC_010901_00064	MOB_Unknown,MOBP	JQ821353,NC_017484_00003	MPF_T	NC_010901_00047	-	-	Conjugative
1057	DQ659147.1	ColRNAI_rep_cluster_1990	000021__NC_011406	-	-	-	-	-	-	Non-mobilizable
1058	DQ787203.1	-	-	-	-	-	-	-	-	Non-mobilizable
1059	DQ787204.1	rep_cluster_1886	001319__DQ787204	-	-	-	-	-	-	Non-mobilizable
1060	DQ787205.1	-	-	-	-	-	-	-	-	Non-mobilizable
1061	DQ832184.1	rep_cluster_1742	001162__CP011831_00015	MOBP	NC_019240_00008	-	-	-	-	Mobilizable
1062	DQ839391.1	IncP,rep_cluster_573	000172__KU578314_00001,001974__KR014105_00003	MOBP	NC_003124_00014	-	-	-	-	Mobilizable
1063	DQ859906.2	rep_cluster_870	002350__DQ859906	MOBV	NC_011073_00002	-	-	-	-	Mobilizable
1064	DQ888171.1	-	-	-	-	-	-	-	-	Non-mobilizable
1065	DQ889676.1	rep_cluster_125	000558__CP013279	-	-	-	-	-	-	Non-mobilizable
1066	DQ915941.1	rep_cluster_137	000691__NC_020556_00001	MOBP	NC_010884_00005	-	-	-	-	Mobilizable
1067	DQ916145.1	ColRNAI_rep_cluster_1291	000002__NC_009781	MOBQ	NZ_AWFJ01000122_00007	-	-	MOBQ,MOBQ	DQ318958,NC_019013	Mobilizable
1068	DQ916413.1	ColRNAI_rep_cluster_1857	000008__AJ627566	MOBF	CP019897	-	-	MOB_unknown	NC_002809	Mobilizable
1069	DQ917780.1	rep_cluster_414	001745__CP002369_00001	-	-	-	-	MOBP	KX575838	Mobilizable
1070	DQ925488.1	rep_cluster_729	002201__DQ925488_00013	-	-	-	-	-	-	Non-mobilizable
1071	DQ979387.1	-	-	MOBV	NC_010917_00003	-	-	-	-	Mobilizable
1072	DQ995351.1	ColRNAI_rep_cluster_1885	000013__DQ995351_00001	-	-	-	-	-	-	Non-mobilizable
1073	DQ995352.1	rep_cluster_1778	001199__DQ995352_00003	MOBQ	NC_008487_00001	-	-	MOBQ	NC_013507	Mobilizable
1074	DQ995353.1	ColRNAI_rep_cluster_1857	000008__AJ627566	MOBP	NC_020251_00005	-	-	MOBP	MF083142	Mobilizable
1075	DQ995354.1	ColRNAI_rep_cluster_1291	000001__EU090225_00001	MOBQ	NC_019783_00003	-	-	-	-	Mobilizable
1076	DQ995355.1	ColRNAI_rep_cluster_1987	000019__CP000651_00005	-	-	-	-	MOBP	AJ001708	Mobilizable
1077	DQ996270.1	-	-	-	-	-	-	-	-	Non-mobilizable
1078	DQ996271.1	-	-	-	-	-	-	-	-	Non-mobilizable
1079	EF015591.1	-	-	-	-	-	-	-	-	Non-mobilizable
1080	EF015636.1	-	-	MOBF	NC_019255_00001	-	-	-	-	Mobilizable
1081	EF050075.1	rep_cluster_853	002335__EF050075_00003	MOBP	NC_010858_00001	-	-	-	-	Mobilizable
1082	EF066650.1	rep_cluster_590	002015__EF066650_00001	MOBQ	NC_010865_00150	MPF_T	NC_010865_00164,NC_010865_00170,NC_010865_00147	-	-	Conjugative
1083	EF079106.1	IncP	000180__NC_006830_00001	MOBP	NC_007353_00011	MPF_T	NC_006830_00008,NC_007353_00043,NC_006830_00009,NC_019318_00040	MOBP	NC_021622	Conjugative
1084	EF088686.1	ColRNAI_rep_cluster_1987	000019__CP000651_00005	MOBP	NC_011404_00002	-	-	MOBP	NZ_HG941720	Mobilizable
1085	EF090911.1	ColRNAI_rep_cluster_1987	000019__CP000651_00005	-	-	-	-	MOBP	AJ001708	Mobilizable
1086	EF107516.1	rep_cluster_620	002070__EF107516_00071	-	-	MPF_T	NC_006824_00016,NC_001735_00049	MOBP	NC_017965	Mobilizable
1087	EF150947.1	ColRNAI_rep_cluster_1987	000019__CP000651_00005	-	-	-	-	MOBP	CP007658	Mobilizable
1088	EF196093.1	rep_cluster_64	002094__CP002342_00006	-	-	-	-	-	-	Non-mobilizable
1089	EF219134.3	IncN	000151__NC_019163_00001	MOBF	NC_015872_00034	MPF_T	NC_015872_00010,NC_015872_00033,NC_015872_00005,NC_015872_00007,NC_015872_00011,NC_015872_00006	-	-	Conjugative
1090	EF221636.1	-	-	-	-	-	-	-	-	Non-mobilizable
1091	EF375609.1	-	-	MOBF	NC_010905_00036	-	-	-	-	Mobilizable
1092	EF382672.1	rep_cluster_1088,IncH	000338__NC_021819,000139__NC_012555_00001	MOBH	NC_012555_00231	MPF_F	NC_021845_00017,NC_005211_00012,NC_005211_00030,NC_005211_00005,NC_005211_00207,NC_005211_00200,NC_009838_00006	MOBH	NC_017484	Conjugative
1093	EF407946.1	rep_cluster_193	001370__EF407946	-	-	-	-	-	-	Non-mobilizable
1094	EF407947.1	rep_cluster_780	002258__EF407947	-	-	-	-	-	-	Non-mobilizable
1095	EF426472.1	rep_cluster_624	002075__EF426472	-	-	-	-	-	-	Non-mobilizable
1096	EF426473.1	rep_cluster_594	002026__EF426473	-	-	-	-	-	-	Non-mobilizable
1097	EF432638.1	rep_cluster_49	001854__CP002848	-	-	-	-	-	-	Non-mobilizable
1098	EF452232.1	Inc13	000063__EF452232_00003	-	-	-	-	-	-	Non-mobilizable
1099	EF488047.1	ColRNAI_rep_cluster_1987	000019__CP000651_00005	-	-	-	-	-	-	Non-mobilizable
1100	EF495198.1	rep_cluster_208	001475__EF495198_00004	MOBQ	NC_009476_00025	MPF_T	NC_009476_00028	-	-	Conjugative
1101	EF495211.1	-	-	MOBP	NC_010494_00069	-	-	-	-	Mobilizable
1102	EF495212.1	-	-	MOBF	NC_010492_00038	MPF_T	NC_010492_00045,NC_010492_00040	-	-	Conjugative
1103	EF535851.1	-	-	-	-	-	-	-	-	Non-mobilizable
1104	EF537646.1	rep_cluster_1230	000528__EF537646_00002	-	-	-	-	-	-	Non-mobilizable
1105	EF564599.1	rep_cluster_17	001108__EF564599	MOBQ	NC_010927_00006	-	-	-	-	Mobilizable
1106	EF605268.1	rep_cluster_1827	001247__NC_010875_00002	MOBV	NC_010875_00006	-	-	-	-	Mobilizable
1107	EF633507.1	IncW	000213__AM901564_00031	MOBF	NC_010643_00013	MPF_T	NC_009982_00017,NC_010643_00022,NC_009982_00012,NC_009982_00013	MOBF	CP019003	Conjugative
1108	EF679779.1	rep_cluster_455	001800__NC_010370_00024	MOBP	NC_010370_00011	-	-	-	-	Mobilizable
1109	EU030683.1	rep_cluster_888	002365__NC_010908_00001	-	-	-	-	-	-	Non-mobilizable
1110	EU043115.1	rep_cluster_996	002481__EU043115_00004	-	-	-	-	-	-	Non-mobilizable
1111	EU090225.1	ColRNAI_rep_cluster_1291	000001__EU090225_00001	MOBQ	NC_019783_00003	-	-	-	-	Mobilizable
1112	EU092237.1	ColRNAI_rep_cluster_1857	000012__CP000801	-	-	-	-	-	-	Non-mobilizable
1113	EU130936.1	rep_cluster_617	002066__NC_020243_00001	MOBP	NC_020243_00005	-	-	-	-	Mobilizable
1114	EU137666.1	-	-	-	-	-	-	-	-	Non-mobilizable
1115	EU149765.1	rep_cluster_740	002218__EU149765	-	-	-	-	-	-	Non-mobilizable
1116	EU156059.1	-	-	-	-	-	-	-	-	Non-mobilizable
1117	EU159455.1	-	-	-	-	-	-	-	-	Non-mobilizable
1118	EU164802.1	rep_cluster_1017	000258__NC_013297_00004	-	-	-	-	MOBV	JX469834	Mobilizable
1119	EU170348.1	rep_cluster_1230	000530__NC_010626_00002	-	-	-	-	-	-	Non-mobilizable
1120	EU185047.1	Inc11	000037__LM651913_00001	MOBV	NC_010936_00005	-	-	MOBV	NZ_CP009579	Mobilizable
1121	EU186381.1	-	-	MOBQ,MOBQ	NC_016814_00131,NC_002575_00134	MPF_T	NC_019555_00155,NC_010841_00159,NC_010841_00162,NC_009621_00340,NC_011982_00179,NC_002575_00190,NC_002575_00131,NC_011982_00176,NC_011982_00166	-	-	Conjugative
1122	EU192194.2	Inc11	000046__NC_019252_00004	MOBP	NC_010423_00006	-	-	-	-	Mobilizable
1123	EU195449.1	IncN	000155__CP018649	MOBF	NC_015599_00019	MPF_T	NC_009131_00030,NC_014368_00014,NC_007682_00044,NC_011617_00041,NC_008612_00190,NC_022375_00024	MOBF	NZ_CP016035	Conjugative
1124	EU219533.1	IncX1	000215__KC853434_00019	MOBP	NC_019096_00001	MPF_T	NC_019067_00043,NC_013503_00034,NC_010860_00022,NC_017624_00009,NC_023277_00163	-	-	Conjugative
1125	EU236595.3	rep_cluster_689	002156__NC_010914_00001	-	-	-	-	-	-	Non-mobilizable
1126	EU255257.1	rep_cluster_1628	001017__NC_013543_00012	-	-	-	-	-	-	Non-mobilizable
1127	EU266532.1	IncQ1	000194__NC_012006_00002	MOBQ	NC_002636_00002	-	-	MOBQ	CP021341	Mobilizable
1128	EU294228.1	rep_cluster_1364,rep_cluster_1903	000683__KY499579_00008,001339__KY202458_00009	-	-	-	-	-	-	Non-mobilizable
1129	EU315244.1	rep_cluster_236	001511__KJ850907_00001	MOBP	NC_010332_00013	MPF_T	NC_010332_00025,NC_010332_00022,NC_010332_00028,NC_010332_00023	-	-	Conjugative
1130	EU327398.1	rep_cluster_943	002427__EU327398_00006	-	-	-	-	-	-	Non-mobilizable
1131	EU330199.1	IncFIIA,IncFII,IncFIB	000136__AP014877_00014,000121__CP024805,000095__NZ_CP014273_00094	MOBF,MOBP	NC_017627_00068,NC_011416_00039	MPF_F	NC_018966_00040,NC_010719_00096,08-5333_00200,NC_022651_00077,NC_017639_00094,NC_017054_00096,NC_019094_00068,NC_007675_00027,NC_019094_00090,NC_013437_00116,NC_014615_00033,NC_010409_00124	MOBF	FN868248	Conjugative
1132	EU331425.1	ColRNAI_rep_cluster_1987	000019__CP000651_00005	-	-	-	-	MOB_unknown	CP016722	Mobilizable
1133	EU331426.1	ColRNAI_rep_cluster_1987	000019__CP000651_00005	-	-	-	-	MOB_unknown	CP016722	Mobilizable
1134	EU333812.1	rep_cluster_1017	000266__NC_022227_00004	-	-	-	-	-	-	Non-mobilizable
1135	EU350088.1	rep_cluster_1017	000265__NC_019146_00001	-	-	-	-	-	-	Non-mobilizable
1136	EU350089.1	rep_cluster_1947	001391__NC_019143_00002	-	-	-	-	-	-	Non-mobilizable
1137	EU350090.1	rep_cluster_1947	001391__NC_019143_00002	-	-	-	-	-	-	Non-mobilizable
1138	EU362918.1	rep_cluster_1848,rep_cluster_1895	001273__EU362918,001330__CP009719	-	-	-	-	-	-	Non-mobilizable
1139	EU362919.1	-	-	MOBP	NC_018687_00155	MPF_T	NC_010283_00021	-	-	Conjugative
1140	EU365621.1	rep_cluster_1118	000379__NC_013452_00003	MOBV	NC_010262_00002	-	-	-	-	Mobilizable
1141	EU365622.1	rep_cluster_1118	000379__NC_013452_00003	MOBV	NC_010262_00002	-	-	-	-	Mobilizable
1142	EU366902.1	rep_cluster_936	002421__GU237136_00023	MOBQ	NC_013653_00017	MPF_T	NC_010279_00007,NC_013653_00035	-	-	Conjugative
1143	EU370687.1	rep_cluster_1425	000765__EU370687_00001	-	-	-	-	-	-	Non-mobilizable
1144	EU370913.1	IncX1	000217__NC_019106_00041	MOBP	NC_019096_00001	MPF_T	NC_019067_00043,NC_010860_00022,NC_017624_00009,NC_023277_00163,NC_019138_00026	-	-	Conjugative
1145	EU372836.1	rep_cluster_1982	001423__CP003991	MOBP	NC_010311_00174	-	-	-	-	Mobilizable
1146	EU383016.1	IncFII	000117__EU383016_00001	-	-	MPF_T	NC_013284_00016,NC_005814_00013,NC_010726_00014,NC_010726_00011	-	-	Non-mobilizable
1147	EU410482.1	-	-	-	-	-	-	-	-	Non-mobilizable
1148	EU418923.1	IncI1	000145__HE610900_00001	MOBP	NC_019097	MPF_I	NC_019097_00075,NC_015965_00072,NC_022267_00069,NC_019097_00056,NC_023290_00086,NC_019111_00038,NC_022267_00057,NZ_CM001473_00069,NC_019097_00085	MOBP	JN253636	Conjugative
1149	EU418926.1	IncI1	000145__HE610900_00001	MOBP	NC_019097	MPF_I	NC_022267_00069,NC_019097_00075,NC_022267_00057,NC_015965_00072,NC_019097_00056,NZ_CM001473_00069,NC_019097_00085,NC_023290_00086,NC_019111_00038	MOBP	JN253636	Conjugative
1150	EU418931.1	IncI1	000145__HE610900_00001	MOBP	NC_019097	MPF_I	NZ_CM001473_00069,NC_022267_00057,NC_023290_00086,NC_019097_00056,NC_019111_00038,NC_019097_00085,NC_019097_00075,NC_022267_00069,NC_015965_00072	MOBP	HM021326	Conjugative
1151	EU421841.2	rep_cluster_355	001670__CP002577_00032	MOBP,MOBQ	NC_004734_00005,NC_015854_00019	-	-	MOBP	CP016705	Mobilizable
1152	EU429323.1	-	-	-	-	-	-	-	-	Non-mobilizable
1153	EU429343.1	Inc11	000042__NC_011798_00002	-	-	-	-	-	-	Non-mobilizable
1154	EU555173.1	Inc11	000039__EU555173_00002	-	-	-	-	-	-	Non-mobilizable
1155	EU573358.1	rep_cluster_1528	000883__NC_010614_00085	MOBF	NC_010614_00034	MPF_F	NC_010614_00019,NC_010614_00013,NC_010614_00016,NC_010614_00023,NC_010614_00009,NC_010614_00020,NC_010614_00029,NC_010614_00024,NC_010614_00012,NC_010614_00015	-	-	Conjugative
1156	EU574928.1	rep_cluster_1345	000663__EU574928_00010	-	-	-	-	-	-	Non-mobilizable
1157	EU583804.1	rep_cluster_54	001911__CP006015	-	-	-	-	-	-	Non-mobilizable
1158	EU595645.1	-	-	MOBV	NC_006374_00002	-	-	-	-	Mobilizable
1159	EU596446.1	rep_cluster_2013	001449__EU596446	-	-	-	-	-	-	Non-mobilizable
1160	EU602348.1	rep_cluster_1230	000530__NC_010626_00002	-	-	-	-	-	-	Non-mobilizable
1161	EU636993.1	rep_cluster_1403	000745__EU636993_00001	MOBP	NC_010675_00004	-	-	-	-	Mobilizable
1162	EU675685.1	ColRNAI_rep_cluster_1857	000008__AJ627566	MOBF	CP019897	-	-	-	-	Mobilizable
1163	EU685104.1	-	-	MOBV	NC_012642_00002	-	-	-	-	Mobilizable
1164	EU697813.1	ColRNAI_rep_cluster_1987	000019__CP000651_00005	MOBP	NC_013090_00004	-	-	MOBP	CP017079	Mobilizable
1165	EU707943.1	rep_cluster_1080	000334__EU707943_00001	-	-	-	-	-	-	Non-mobilizable
1166	EU709732.1	-	-	-	-	-	-	-	-	Non-mobilizable
1167	EU715370.1	rep_cluster_1875	001311__EU715370_00012	MOBP	NC_019361_00015	-	-	-	-	Mobilizable
1168	EU727537.1	rep_cluster_1931	001373__NC_016793	MOBV	NC_016793_00005	-	-	-	-	Mobilizable
1169	EU741249.1	rep_cluster_809	002293__NC_011336_00001	-	-	-	-	-	-	Non-mobilizable
1170	EU818711.2	rep_cluster_1097	000350__EU818711_00002	-	-	-	-	-	-	Non-mobilizable
1171	EU850812.1	Inc13	000065__NC_013091_00003	-	-	-	-	-	-	Non-mobilizable
1172	EU850813.1	rep_cluster_1050	000294__NC_013092_00007	-	-	-	-	-	-	Non-mobilizable
1173	EU855787.1	rep_cluster_1088,IncH	000338__NC_021819,000139__NC_012555_00001	MOBH	NC_012555_00231	MPF_F	NC_005211_00005,NC_021845_00017,NC_005211_00012,NC_005211_00030,NC_005211_00207,NC_009838_00006,NC_005211_00200	MOBH	NC_017484	Conjugative
1174	EU855788.1	rep_cluster_1088,IncH	000338__NC_021819,000139__NC_012555_00001	MOBH	NC_012555_00231	MPF_F	NC_021845_00017,NC_005211_00005,NC_005211_00207,NC_005211_00030,NC_009838_00006,NC_005211_00012,NC_005211_00200	MOBH	NC_017484	Conjugative
1175	EU880929.1	IncN	000155__CP018649	MOBF	NC_015599_00019	MPF_T	NC_003292_00012,NC_007682_00044,NC_022375_00024,NC_008612_00190,NC_014368_00014,NC_007682_00039	MOBF	NZ_CP016498	Conjugative
1176	EU881985.1	rep_cluster_689	002157__NC_011136_00001	-	-	-	-	-	-	Non-mobilizable
1177	EU925817.1	IncQ2	000201__KJ631731_00005	MOBF	NC_019262_00003	-	-	-	-	Mobilizable
1178	EU930825.1	rep_cluster_1078	000328__EU930825_00001	MOBP	NC_019141_00004	-	-	-	-	Mobilizable
1179	EU935739.1	IncFIA,IncFII,IncFIIA	000094__NZ_CP015070_00117,000121__CP024805,000136__AP014877_00014	-	-	MPF_F	NC_010409_00124,NC_017639_00094,NC_022651_00077,NC_019094_00090,NC_013437_00116	MOBF	KT754162	Mobilizable
1180	EU938349.1	IncL/M	000148__NC_021488_00028	MOBP	NC_004464_00056	MPF_I	NC_004464_00105,NC_005246_00069,NC_004464_00066,NC_019063_00094,NC_019344_00078,NC_005246_00057,NC_004464_00073,NC_019154_00069	-	-	Conjugative
1181	EU999782.1	ColRNAI_rep_cluster_1885	000014__NC_008486	-	-	-	-	MOB_unknown,MOBP	GQ900404,CP001386	Mobilizable
1182	FJ012880.1	rep_cluster_481	001839__KT325596	MOBP	NZ_AEOY01000096_00007	MPF_T	NC_019217_00010,NC_019217_00008,NC_019218_00004,NC_019218_00007,NZ_ALIR01000021_00020	MOBP	NC_021158	Conjugative
1183	FJ012881.1	rep_cluster_481	001839__KT325596	MOBP	NZ_AEOY01000096_00007	MPF_T	NC_019218_00004,NC_019217_00008,NC_019217_00010,NZ_ALIR01000021_00020,NC_019218_00007	MOBP	NC_021158	Conjugative
1184	FJ012882.1	rep_cluster_481	001839__KT325596	MOBP	NZ_AEOY01000096_00007	MPF_T	NC_019218_00004,NC_019217_00008,NC_019218_00007,NZ_ALIR01000021_00020,NC_019217_00010	MOBP	KC734561	Conjugative
1185	FJ040197.1	rep_cluster_1977	001418__EU784088	-	-	-	-	-	-	Non-mobilizable
1186	FJ042668.1	-	-	-	-	-	-	-	-	Non-mobilizable
1187	FJ172221.1	rep_cluster_1433	000774__FJ172221_00005	MOBP	NC_022243_00008	-	-	-	-	Mobilizable
1188	FJ176937.1	-	-	-	-	-	-	-	-	Non-mobilizable
1189	FJ197818.1	-	-	MOBF,MOBP	NC_019255_00001,NC_019214_00002	-	-	-	-	Mobilizable
1190	FJ207465.1	rep_cluster_1078	000330__NC_011605_00001	MOBP	NC_019141_00004	-	-	-	-	Mobilizable
1191	FJ223605.1	IncN	000155__CP018649	MOBF	NC_015599_00019	MPF_T	NC_014368_00014,NC_008612_00190,NC_022375_00024,NC_009131_00030,NC_007682_00044	MOBF	NZ_CP016498	Conjugative
1192	FJ223606.1	ColRNAI_rep_cluster_1857	000004__DQ298019	MOBC	NC_009793_00003	-	-	-	-	Mobilizable
1193	FJ223607.1	IncN	000155__CP018649	MOBF	NC_015599_00019	MPF_T	NC_014368_00014,NC_022375_00024,NC_011617_00041,NC_009131_00030,NC_008612_00190,NC_007682_00044	MOBF	NZ_CP012928	Conjugative
1194	FJ234438.1	-	-	MOBF,MOBP	NC_019255_00001,NC_012216_00002	-	-	-	-	Mobilizable
1195	FJ374272.1	Inc11	000051__FJ374272_00004	-	-	-	-	-	-	Non-mobilizable
1196	FJ375766.1	rep_cluster_689	002155__NC_001370_00001	-	-	-	-	-	-	Non-mobilizable
1197	FJ494913.1	IncFIIA,IncFII	000136__AP014877_00014,000121__CP024805	MOBF	NC_017627_00068	MPF_F	NC_010719_00097,NC_007675_00027,NC_022651_00077,NC_017054_00096,NC_018966_00040,NC_010719_00096,NC_019094_00090,NC_010409_00124,NC_019094_00068,NC_013437_00116,NC_017639_00094,NC_019072_00073	MOBF	CP019842	Conjugative
1198	FJ573246.1	ColRNAI_rep_cluster_1291	000001__EU090225_00001	MOBQ	NZ_AWFJ01000122_00007	-	-	MOBQ,MOBQ	NC_019096,DQ318958	Mobilizable
1199	FJ613505.1	rep_cluster_1236	000544__FJ613505_00004	MOBP	NC_012033_00002	-	-	-	-	Mobilizable
1200	FJ621586.1	IncA/C2	000092__CP025470	MOBH	NC_012690_00071	MPF_F	NC_016974_00085,NC_012885_00083,NC_012885_00167	-	-	Conjugative
1201	FJ621587.1	IncA/C2	000092__CP025470	MOBH	NC_012885_00072	MPF_F	NC_012885_00167,NC_014170_00023,NC_009140_00071,NC_023291_00077,NC_012885_00083,NC_016974_00085,NC_012885_00091,NC_012885_00088	-	-	Conjugative
1202	FJ626843.1	-	-	-	-	-	-	-	-	Non-mobilizable
1203	FJ649478.1	rep_cluster_1699	001107__JN225497_00005	MOBP	NC_019377_00008	-	-	-	-	Mobilizable
1204	FJ666132.1	IncX1	000215__KC853434_00019	MOBP	NC_019096_00001	MPF_T	NC_017624_00009,NC_013503_00034,NC_010860_00022,NC_019067_00043,NC_023277_00163	MOBP	GQ900390	Conjugative
1205	FJ696404.1	IncQ2	000201__KJ631731_00005	MOBF	NC_019262_00003	-	-	-	-	Mobilizable
1206	FJ705299.1	rep_cluster_1374	000706__NC_019187_00001	-	-	-	-	-	-	Non-mobilizable
1207	FJ705301.1	rep_cluster_1374	000706__NC_019187_00001	-	-	-	-	-	-	Non-mobilizable
1208	FJ705806.1	IncA/C2	000090__FJ705807_00003	-	-	-	-	-	-	Non-mobilizable
1209	FJ705807.1	IncA/C2	000090__FJ705807_00003	MOBH	NC_012885_00072	MPF_F	NC_012885_00082,NC_012885_00088,NC_012885_00167,NC_012885_00084,NC_009140_00071,NC_012885_00093,NC_012885_00083,NC_012885_00091	-	-	Conjugative
1210	FJ755814.1	rep_cluster_689	002155__NC_001370_00001	-	-	-	-	-	-	Non-mobilizable
1211	FJ851149.1	rep_cluster_707,rep_cluster_707	002178__NC_021518,002175__NC_017468_00016	-	-	-	-	-	-	Non-mobilizable
1212	FJ865444.1	rep_cluster_1876	001312__DQ186900	-	-	-	-	-	-	Non-mobilizable
1213	FJ876826.1	rep_cluster_1418,IncFII,IncFII	000759__NC_013950_00034,000129__CP018340,000113__CP022035	MOBF	NC_021231_00058	MPF_F	NC_023332_00154,NC_014312_00141,NC_021654_00016,NC_019389_00080,NC_014312_00118,NC_014312_00116,NC_021502_00150,NC_014312_00128,NC_019165_00034,NC_019389_00068,NC_021502_00131,NC_022609_00081	-	-	Conjugative
1214	FJ905104.1	rep_cluster_674	002135__HQ332529	-	-	-	-	-	-	Non-mobilizable
1215	FJ947048.1	rep_cluster_337	001651__FJ947048	MOBP	NC_019361_00015	-	-	-	-	Mobilizable
1216	FJ948173.1	-	-	MOBP	NC_001735_00050	MPF_T	NC_001735_00049,NC_004956_00085,NC_008459_00022	MOBP	KU302802	Conjugative
1217	FJ985252.1	ColRNAI_rep_cluster_1291	000001__EU090225_00001	-	-	-	-	MOBQ,MOBQ	DQ318958,NZ_CP009103	Mobilizable
1218	FM210331.1	rep_cluster_1172	000453__KU549174_00001	-	-	-	-	-	-	Non-mobilizable
1219	FN394966.1	Inc13	000059__FN394966_00002	-	-	-	-	-	-	Non-mobilizable
1220	FN429022.1	rep_cluster_1981	001422__NC_019204_00002	-	-	-	-	-	-	Non-mobilizable
1221	FN429023.1	-	-	-	-	-	-	-	-	Non-mobilizable
1222	FN429025.1	rep_cluster_1970	001412__NC_017092_00002	-	-	-	-	-	-	Non-mobilizable
1223	FN429026.1	rep_cluster_1981	001422__NC_019204_00002	-	-	-	-	-	-	Non-mobilizable
1224	FN429765.1	rep_cluster_233	001503__FN429765	-	-	-	-	-	-	Non-mobilizable
1225	FN429766.1	rep_cluster_269	001546__FN429766	-	-	-	-	-	-	Non-mobilizable
1226	FN429767.1	-	-	-	-	-	-	-	-	Non-mobilizable
1227	FN429768.1	rep_cluster_78	002257__FN429768_00006	-	-	-	-	-	-	Non-mobilizable
1228	FN432031.1	IncFIB,IncQ1,IncFII	000101__NZ_CP012345_00042,000195__NC_013728_00014,000114__CP015527	MOBF	NC_007208_00043	MPF_F	NC_022651_00077,NC_013437_00116,NC_014615_00033,NC_017054_00098,NC_019112_00063,NC_017054_00095,NC_003277_00107,NC_017054_00100,NC_017054_00096,NZ_CM001063_00039,NC_019002_00072,NC_019094_00090	-	-	Conjugative
1229	FN594520.1	IncFII,IncFIIA	000121__CP024805,000136__AP014877_00014	MOBF	NC_017627_00068	MPF_F	NC_018966_00040,NC_008460_00107,NC_022651_00077,08-5333_00200,NC_010719_00097,NC_017054_00096,NC_019094_00068,NC_017639_00094,NC_013437_00116,NC_010409_00124,NC_019094_00090,NC_007675_00027	MOBF	CP019007	Conjugative
1230	FN597255.1	-	-	-	-	-	-	-	-	Non-mobilizable
1231	FN597600.2	rep_cluster_1313	000632__NC_014653_00050	MOBF	NC_014653_00043	MPF_F	NC_014653_00038,NC_014653_00017,NC_014653_00037,NC_014653_00018,NC_014653_00020,NC_014653_00015,NC_014653_00019,NC_014653_00040,NC_014653_00032,NC_014653_00016,NC_014653_00023,NC_014653_00030,NC_014653_00033	-	-	Conjugative
1232	FN667595.1	rep_cluster_689	002153__AB370335_00002	MOBP	NC_019900_00006	-	-	-	-	Mobilizable
1233	FN668942.1	-	-	-	-	-	-	-	-	Non-mobilizable
1234	FN677368.1	rep_cluster_1823	001242__FN677368	MOBP	NC_015171_00005	-	-	-	-	Mobilizable
1235	FN691998.1	rep_cluster_1237	000545__FN691998_00025	MOBC	FN691998_00005	MPF_T	NC_022533_00014,NC_013284_00016,NC_022533_00012	-	-	Conjugative
1236	FN806792.1	Inc11	000047__NC_019142_00004	MOBV	NC_019142_00002	-	-	-	-	Mobilizable
1237	FN822745.1	IncFII,IncFIIA	000121__CP024805,000136__AP014877_00014	-	-	MPF_F	NC_010719_00097,NC_008460_00107,08-5333_00200,NC_010409_00124,NC_022651_00077	MOBP	NC_022374	Mobilizable
1238	FN822746.1	IncFII,IncFIB,IncI1	000121__CP024805,000096__NC_019117_00097,000145__HE610900_00001	-	-	-	-	-	-	Non-mobilizable
1239	FN822749.1	ColRNAI_rep_cluster_1857	000009__CP017845	MOBP	NC_019076_00002	-	-	MOBP	CP019559	Mobilizable
1240	FN868248.1	-	-	-	-	-	-	MOB_unknown	CP016709	Mobilizable
1241	FN868832.1	IncI1	000144__CP015838_00058	MOBP	NC_013728_00087	MPF_I	NC_014843_00047,NC_011754_00109,NC_022992_00098,NC_011754_00087,NC_007365_00035,NC_022371_00084,NC_014843_00033,NC_012487_00131,NC_014843_00041	MOBP	CP018984	Conjugative
1242	FN869858.1	rep_cluster_1102	000360__NC_014367_00001	-	-	-	-	-	-	Non-mobilizable
1243	FP885890.1	rep_cluster_1712	001122__FP885890_00020	-	-	-	-	-	-	Non-mobilizable
1244	FP885907.1	-	-	-	-	-	-	-	-	Non-mobilizable
1245	FP893246.1	rep_cluster_124	000547__FP893246_00058	MOBF	NC_015156_00094	MPF_F	NC_015156_00104,NC_015156_00111,NC_015156_00108,NC_015156_00110,NC_015156_00097,NC_015156_00107,NC_015156_00098,NC_015156_00102,NC_015156_00095,NC_015156_00106,NC_015156_00103,NC_015156_00101	-	-	Conjugative
1246	FR667693.1	rep_cluster_102	000270__FR667693_00001	MOBP	NC_014496_00038	-	-	-	-	Mobilizable
1247	FR675941.1	rep_cluster_1912	001352__CP009349	MOBP	NC_007105_00053	-	-	-	-	Mobilizable
1248	FR719210.1	-	-	MOBP	NC_018977_00005	-	-	MOBP	CP018941	Mobilizable
1249	FR719211.1	-	-	MOBP,MOBP	NC_017389_00004,NC_001848_00006	-	-	MOBP	CP018941	Mobilizable
1250	FR719212.1	rep_cluster_1099	000354__NC_018978_00001	-	-	-	-	-	-	Non-mobilizable
1251	FR820585.2	rep_cluster_283	001573__FR820585_00001	MOBP	NC_019265_00015	MPF_I	NC_004633_00070,NC_004633_00077	-	-	Conjugative
1252	FR820586.1	rep_cluster_283	001575__FR820586_00001	MOBP,MOBP	NC_019265_00015,NC_007275_00050	MPF_T	NC_007275_00033,NC_007275_00028,NC_005918_00041,NC_019328_00069	MOBP	KY751925	Conjugative
1253	FR872378.1	rep_cluster_554	001938__AF001314_00001	-	-	-	-	MOBP	NC_002524	Mobilizable
1254	GQ131302.1	rep_cluster_390	001715__GQ131302	-	-	-	-	-	-	Non-mobilizable
1255	GQ149342.1	ColRNAI_rep_cluster_1857	000008__AJ627566	-	-	-	-	-	-	Non-mobilizable
1256	GQ149343.1	ColRNAI_rep_cluster_1857,rep_cluster_1018	000008__AJ627566,000268__U32369_00002	-	-	-	-	-	-	Non-mobilizable
1257	GQ149344.1	ColRNAI_rep_cluster_1987	000019__CP000651_00005	-	-	-	-	-	-	Non-mobilizable
1258	GQ149345.1	ColRNAI_rep_cluster_1857	000012__CP000801	-	-	-	-	-	-	Non-mobilizable
1259	GQ149346.1	ColRNAI_rep_cluster_1857	000008__AJ627566	-	-	-	-	-	-	Non-mobilizable
1260	GQ149347.1	rep_cluster_1018,ColRNAI_rep_cluster_1857	000268__U32369_00002,000008__AJ627566	-	-	-	-	-	-	Non-mobilizable
1261	GQ149348.1	ColRNAI_rep_cluster_1857	000008__AJ627566	-	-	-	-	-	-	Non-mobilizable
1262	GQ160960.2	-	-	-	-	-	-	-	-	Non-mobilizable
1263	GQ293073.1	rep_cluster_1087	000337__NC_013358	-	-	-	-	-	-	Non-mobilizable
1264	GQ293074.1	Inc13	000081__NC_011363_00001	-	-	-	-	-	-	Non-mobilizable
1265	GQ329881.1	rep_cluster_1653	001053__GQ329881_00004	-	-	MPF_T	NZ_CM000771_00033	-	-	Non-mobilizable
1266	GQ342610.1	rep_cluster_1364	000684__NC_013506_00012	MOBQ	NC_013506_00013	-	-	-	-	Mobilizable
1267	GQ353340.1	ColRNAI_rep_cluster_1987	000019__CP000651_00005	MOBP	NC_013090_00004	-	-	MOBP	CP007070	Mobilizable
1268	GQ374156.1	ColRNAI_rep_cluster_1987	000019__CP000651_00005	-	-	-	-	MOBP	CP018223	Mobilizable
1269	GQ374157.1	ColRNAI_rep_cluster_1987	000019__CP000651_00005	-	-	-	-	MOBP	CP018223	Mobilizable
1270	GQ377752.1	rep_cluster_1906	001341__NC_013277_00009	-	-	-	-	-	-	Non-mobilizable
1271	GQ379901.1	IncQ1	000192__AM183225_00009	MOBQ	NC_001740_00005	-	-	MOBQ	KU674895	Mobilizable
1272	GQ395338.1	rep_cluster_1139	000417__GQ395338_00004	MOBP	NC_013178_00003	-	-	-	-	Mobilizable
1273	GQ398086.1	IncFIIA,IncFII,ColRNAI_rep_cluster_1291,IncFIB	000136__AP014877_00014,000121__CP024805,000002__NC_009781,000096__NC_019117_00097	MOBF	NC_017627_00068	MPF_F	NC_010409_00124,NC_018966_00040,NC_017054_00096,NC_007675_00027,NC_019072_00073,NC_008460_00107,NC_010719_00097,NC_017630_00031,NC_013437_00116,NC_019094_00090,NC_022651_00077,NC_019094_00068	MOBF	NC_010600	Conjugative
1274	GQ401131.1	rep_cluster_995	002480__NC_019220_00009	MOBP	NC_019220_00017	-	-	-	-	Mobilizable
1275	GQ404376.1	ColRNAI_rep_cluster_1857	000008__AJ627566	-	-	-	-	-	-	Non-mobilizable
1276	GQ468938.1	rep_cluster_881	002360__NC_014832_00001	MOBQ	NC_014832_00018	MPF_T	NC_014832_00021	-	-	Conjugative
1277	GQ470395.1	ColRNAI_rep_cluster_1857	000008__AJ627566	MOBP	NC_014003_00004	-	-	MOBP	NZ_CP011065	Mobilizable
1278	GQ484954.1	Inc18	000085__NC_019213_00005	MOBV	X92945	MPF_T	NC_013514_00028,NC_014475_00046	MOBV	CP016690	Conjugative
1279	GQ484955.1	Inc18	000085__NC_019213_00005	MOBV	X92945	MPF_T	NC_014475_00046,NC_013514_00028	MOBV	CP016690	Conjugative
1280	GQ484956.1	Inc18	000085__NC_019213_00005	MOBV	X92945	MPF_T	NC_014475_00046,NC_013514_00028	MOBV	CP016690	Conjugative
1281	GQ900376.1	rep_cluster_1480	000819__GQ900376_00002	-	-	-	-	-	-	Non-mobilizable
1282	GQ900377.1	rep_cluster_1017,rep_cluster_1215	000261__GQ900456,000509__NC_016643_00001	-	-	-	-	MOBV	CP002151	Mobilizable
1283	GQ900378.1	rep_cluster_1017,rep_cluster_1215	000261__GQ900456,000509__NC_016643_00001	-	-	-	-	-	-	Non-mobilizable
1284	GQ900379.1	rep_cluster_1078,rep_cluster_1017,rep_cluster_1018,rep_cluster_1118,rep_cluster_1142	000331__NC_019148_00002,000261__GQ900456,000268__U32369_00002,000382__CP017110,000421__NC_013320_00022	MOBV,MOBQ,MOBV	NC_022618_00010,NC_013653_00017,NC_010262_00002	MPF_T	NC_013653_00035,NC_010279_00007	-	-	Conjugative
1285	GQ900380.1	rep_cluster_1017,rep_cluster_1733	000261__GQ900456,001150__NC_013330_00017	-	-	-	-	MOBQ	AF001314	Mobilizable
1286	GQ900381.1	rep_cluster_1442,rep_cluster_910,rep_cluster_1281,rep_cluster_1018	000784__NC_007171_00001,002395__NC_013387_00031,000597__NC_005054_00023,000268__U32369_00002	MOBV,MOBP	NC_022618_00010,NC_006663_00031	-	-	MOBV	NC_019122	Mobilizable
1287	GQ900382.1	rep_cluster_1215,rep_cluster_1017	000509__NC_016643_00001,000261__GQ900456	-	-	-	-	MOBQ	FR872378	Mobilizable
1288	GQ900383.1	rep_cluster_910	002395__NC_013387_00031	MOBP	NC_006663_00031	-	-	MOBQ	NC_023315	Mobilizable
1289	GQ900384.1	rep_cluster_1442	000784__NC_007171_00001	MOBP	NC_006663_00031	-	-	MOBP	NC_025177	Mobilizable
1290	GQ900385.1	rep_cluster_1733,rep_cluster_1017	001150__NC_013330_00017,000261__GQ900456	MOBP	NC_005951_00004	-	-	-	-	Mobilizable
1291	GQ900386.1	rep_cluster_250	001528__NC_013373_00008	MOBP	NC_013373_00014	-	-	-	-	Mobilizable
1292	GQ900387.1	rep_cluster_1017,rep_cluster_1017,rep_cluster_1215	000259__NC_013375_00001,000261__GQ900456,000509__NC_016643_00001	-	-	-	-	MOBV	CP018471	Mobilizable
1293	GQ900388.1	rep_cluster_1733,rep_cluster_1017	001150__NC_013330_00017,000261__GQ900456	-	-	-	-	MOBQ	AF001314	Mobilizable
1294	GQ900389.1	rep_cluster_765	002243__GQ900389_00041	MOBP	NC_013325_00011	MPF_T	NC_013325_00006	-	-	Conjugative
1295	GQ900390.1	rep_cluster_1733	001150__NC_013330_00017	-	-	-	-	MOBV	JQ004409	Mobilizable
1296	GQ900391.1	rep_cluster_765	002244__NC_013327_00008	MOBP	NC_013325_00011	MPF_T	NC_013325_00006	MOBP	NC_023328	Conjugative
1297	GQ900392.1	rep_cluster_1733	001150__NC_013330_00017	MOBP	NC_005951_00004	-	-	-	-	Mobilizable
1298	GQ900393.1	rep_cluster_1947	001391__NC_019143_00002	-	-	-	-	-	-	Non-mobilizable
1299	GQ900394.1	rep_cluster_1017,rep_cluster_1733	000261__GQ900456,001150__NC_013330_00017	MOBP	NC_005951_00004	-	-	MOBP	CP003164	Mobilizable
1300	GQ900395.1	rep_cluster_1215,rep_cluster_1118	000508__GQ900453_00001,000380__CP013622_00005	MOBV	NC_010262_00002	-	-	-	-	Mobilizable
1301	GQ900396.1	rep_cluster_1017	000261__GQ900456	-	-	-	-	-	-	Non-mobilizable
1302	GQ900397.1	rep_cluster_1733	001150__NC_013330_00017	MOBP	NC_005951_00004	-	-	-	-	Mobilizable
1303	GQ900398.1	rep_cluster_1017,rep_cluster_1215,rep_cluster_1017	000251__CP007673_00019,000509__NC_016643_00001,000261__GQ900456	-	-	-	-	MOBV	CP002151	Mobilizable
1304	GQ900399.1	rep_cluster_1733	001150__NC_013330_00017	-	-	-	-	MOBV	JQ004409	Mobilizable
1305	GQ900400.1	-	-	-	-	-	-	-	-	Non-mobilizable
1306	GQ900401.1	rep_cluster_1017,rep_cluster_1733	000261__GQ900456,001150__NC_013330_00017	-	-	-	-	MOBQ	FR872378	Mobilizable
1307	GQ900402.1	rep_cluster_910	002395__NC_013387_00031	-	-	-	-	-	-	Non-mobilizable
1308	GQ900403.1	rep_cluster_1733,rep_cluster_1017	001150__NC_013330_00017,000261__GQ900456	-	-	-	-	MOBQ	AF001314	Mobilizable
1309	GQ900404.1	rep_cluster_1017	000258__NC_013297_00004	-	-	-	-	MOB_unknown	NZ_AGFM01000123	Mobilizable
1310	GQ900405.1	rep_cluster_1017	000251__CP007673_00019	MOBQ,MOBP	NC_013331_00006,NC_005951_00004	-	-	-	-	Mobilizable
1311	GQ900406.1	rep_cluster_1215,rep_cluster_1017,rep_cluster_1017	000509__NC_016643_00001,000261__GQ900456,000251__CP007673_00019	-	-	-	-	MOBV	CP002151	Mobilizable
1312	GQ900407.1	rep_cluster_1733,rep_cluster_1017	001150__NC_013330_00017,000261__GQ900456	-	-	-	-	MOBQ	AF001314	Mobilizable
1313	GQ900408.1	rep_cluster_1017	000258__NC_013297_00004	-	-	-	-	MOB_unknown	NZ_AGFM01000123	Mobilizable
1314	GQ900409.1	rep_cluster_1017,rep_cluster_1733	000261__GQ900456,001150__NC_013330_00017	-	-	-	-	MOBQ	AF001314	Mobilizable
1315	GQ900410.1	rep_cluster_1733,rep_cluster_1017	001150__NC_013330_00017,000261__GQ900456	-	-	-	-	MOBQ	AF001314	Mobilizable
1316	GQ900411.1	rep_cluster_1017	000261__GQ900456	-	-	-	-	MOB_unknown	NZ_AGFM01000123	Mobilizable
1317	GQ900412.1	rep_cluster_1017,rep_cluster_1017,rep_cluster_1733,rep_cluster_1947	000252__KP702950_00017,000261__GQ900456,001150__NC_013330_00017,001391__NC_019143_00002	-	-	-	-	MOBQ	AF001314	Mobilizable
1318	GQ900413.1	rep_cluster_1733	001150__NC_013330_00017	MOBP	NC_005951_00004	-	-	-	-	Mobilizable
1319	GQ900414.1	rep_cluster_1017,rep_cluster_1215	000261__GQ900456,000509__NC_016643_00001	-	-	-	-	-	-	Non-mobilizable
1320	GQ900415.1	rep_cluster_1017,rep_cluster_155	000261__GQ900456,000915__CP001784_00003	-	-	-	-	-	-	Non-mobilizable
1321	GQ900416.1	rep_cluster_1215,rep_cluster_1017,rep_cluster_1017	000509__NC_016643_00001,000261__GQ900456,000251__CP007673_00019	-	-	-	-	MOBV	CP002151	Mobilizable
1322	GQ900417.1	rep_cluster_1118	000392__NC_013336_00002	MOBV	NC_010262_00002	-	-	-	-	Mobilizable
1323	GQ900418.1	rep_cluster_1017,rep_cluster_1215,rep_cluster_1017,rep_cluster_910	000251__CP007673_00019,000509__NC_016643_00001,000261__GQ900456,002395__NC_013387_00031	-	-	-	-	-	-	Non-mobilizable
1324	GQ900419.1	rep_cluster_1017,rep_cluster_1215,rep_cluster_1017	000259__NC_013375_00001,000509__NC_016643_00001,000261__GQ900456	-	-	-	-	MOBV	CP018471	Mobilizable
1325	GQ900420.1	rep_cluster_1230	000530__NC_010626_00002	-	-	-	-	-	-	Non-mobilizable
1326	GQ900421.1	rep_cluster_1142	000421__NC_013320_00022	MOBQ	NC_013653_00017	MPF_T	NC_013653_00035,NC_010279_00007	-	-	Conjugative
1327	GQ900422.1	rep_cluster_1142	000421__NC_013320_00022	MOBQ	NC_013653_00017	MPF_T	NC_013653_00035,NC_010279_00007	-	-	Conjugative
1328	GQ900423.1	rep_cluster_1017	000259__NC_013375_00001	-	-	-	-	MOB_unknown	LN890519	Mobilizable
1329	GQ900424.1	rep_cluster_1733	001150__NC_013330_00017	MOBP	NC_005951_00004	-	-	-	-	Mobilizable
1330	GQ900425.1	rep_cluster_1733	001150__NC_013330_00017	MOBP	NC_005951_00004	-	-	-	-	Mobilizable
1331	GQ900426.1	rep_cluster_1215,rep_cluster_1017,rep_cluster_1017	000509__NC_016643_00001,000251__CP007673_00019,000261__GQ900456	-	-	-	-	MOBV	CP002151	Mobilizable
1332	GQ900427.1	rep_cluster_1215,rep_cluster_1017	000509__NC_016643_00001,000261__GQ900456	MOBP	NC_005951_00004	-	-	-	-	Mobilizable
1333	GQ900428.1	rep_cluster_1017,rep_cluster_1215	000261__GQ900456,000509__NC_016643_00001	MOBP	NC_005951_00004	-	-	-	-	Mobilizable
1334	GQ900429.1	-	-	-	-	-	-	-	-	Non-mobilizable
1335	GQ900430.1	rep_cluster_1215,rep_cluster_1017	000509__NC_016643_00001,000261__GQ900456	MOBP	NC_005951_00004	-	-	-	-	Mobilizable
1336	GQ900431.1	rep_cluster_1947	001391__NC_019143_00002	-	-	-	-	-	-	Non-mobilizable
1337	GQ900432.1	rep_cluster_1142,rep_cluster_1281	000421__NC_013320_00022,000597__NC_005054_00023	MOBQ	NC_013653_00017	MPF_T	NC_010279_00007,NC_013653_00035	-	-	Conjugative
1338	GQ900433.1	rep_cluster_1142	000421__NC_013320_00022	MOBQ	NC_013653_00017	MPF_T	NC_013653_00035,NC_010279_00007	-	-	Conjugative
1339	GQ900434.1	rep_cluster_1281,rep_cluster_1142	000597__NC_005054_00023,000421__NC_013320_00022	MOBQ	NC_013653_00017	MPF_T	NC_010279_00007,NC_013653_00035	-	-	Conjugative
1340	GQ900435.1	-	-	-	-	-	-	-	-	Non-mobilizable
1341	GQ900436.1	rep_cluster_1078	000327__NC_005243	MOBP	NC_013306_00004	-	-	-	-	Mobilizable
1342	GQ900437.1	rep_cluster_1118	000379__NC_013452_00003	MOBV	NC_010262_00002	-	-	-	-	Mobilizable
1343	GQ900438.1	Inc11	000054__HG380318_00002	MOBV	NC_013345_00003	-	-	-	-	Mobilizable
1344	GQ900439.1	-	-	-	-	-	-	-	-	Non-mobilizable
1345	GQ900440.1	rep_cluster_1078	000327__NC_005243	-	-	-	-	-	-	Non-mobilizable
1346	GQ900441.1	rep_cluster_1078	000331__NC_019148_00002	MOBV	NC_010262_00002	-	-	-	-	Mobilizable
1347	GQ900442.1	rep_cluster_1947	001390__NC_005565_00001	-	-	-	-	-	-	Non-mobilizable
1348	GQ900443.1	rep_cluster_1118	000379__NC_013452_00003	MOBV	NC_010262_00002	-	-	-	-	Mobilizable
1349	GQ900444.1	rep_cluster_1215,rep_cluster_1017	000509__NC_016643_00001,000261__GQ900456	-	-	-	-	-	-	Non-mobilizable
1350	GQ900445.1	rep_cluster_1118	000379__NC_013452_00003	MOBV	NC_010262_00002	-	-	-	-	Mobilizable
1351	GQ900446.1	rep_cluster_1017,rep_cluster_1215	000261__GQ900456,000509__NC_016643_00001	-	-	-	-	-	-	Non-mobilizable
1352	GQ900447.1	rep_cluster_1017,rep_cluster_1017,rep_cluster_1215	000251__CP007673_00019,000261__GQ900456,000509__NC_016643_00001	-	-	-	-	MOBV	CP002151	Mobilizable
1353	GQ900448.1	rep_cluster_1733	001150__NC_013330_00017	-	-	-	-	MOBV	JQ004409	Mobilizable
1354	GQ900449.1	-	-	-	-	-	-	-	-	Non-mobilizable
1355	GQ900452.1	rep_cluster_1110	000368__GQ900452_00020	-	-	-	-	-	-	Non-mobilizable
1356	GQ900453.1	rep_cluster_1215	000508__GQ900453_00001	-	-	-	-	-	-	Non-mobilizable
1357	GQ900454.2	rep_cluster_418	001753__AB125341_00033	MOBP	NC_005566_00002	-	-	-	-	Mobilizable
1358	GQ900455.1	rep_cluster_1256	000568__NC_013380_00007	MOBP	NC_005566_00002	-	-	-	-	Mobilizable
1359	GQ900456.1	rep_cluster_1017	000261__GQ900456	-	-	-	-	-	-	Non-mobilizable
1360	GQ900457.1	rep_cluster_910	002395__NC_013387_00031	-	-	-	-	-	-	Non-mobilizable
1361	GQ900458.1	rep_cluster_1110,rep_cluster_1017	000369__CP003673_00018,000261__GQ900456	-	-	-	-	-	-	Non-mobilizable
1362	GQ900459.1	rep_cluster_1256	000568__NC_013380_00007	MOBP	NC_005003_00003	-	-	MOBP	NZ_CP016009	Mobilizable
1363	GQ900460.1	rep_cluster_1118	000380__CP013622_00005	MOBP	NC_019969_00003	-	-	-	-	Mobilizable
1364	GQ900461.2	rep_cluster_1017	000263__NC_013392_00001	-	-	-	-	-	-	Non-mobilizable
1365	GQ900462.1	rep_cluster_1302	000620__GQ900462	-	-	-	-	-	-	Non-mobilizable
1366	GQ900463.1	rep_cluster_1078	000326__NC_013394_00005	MOBP	NC_013306_00004	-	-	-	-	Mobilizable
1367	GQ900464.1	rep_cluster_1017	000265__NC_019146_00001	-	-	-	-	-	-	Non-mobilizable
1368	GQ900465.1	rep_cluster_910	002395__NC_013387_00031	-	-	-	-	-	-	Non-mobilizable
1369	GQ900466.1	-	-	-	-	-	-	-	-	Non-mobilizable
1370	GQ900467.1	rep_cluster_1733	001150__NC_013330_00017	MOBP	NC_005951_00004	-	-	-	-	Mobilizable
1371	GQ900468.1	rep_cluster_1130	000409__NC_019011_00001	-	-	-	-	-	-	Non-mobilizable
1372	GQ904226.1	rep_cluster_1364	000684__NC_013506_00012	MOBQ	NC_013506_00013	-	-	-	-	Mobilizable
1373	GQ904227.1	rep_cluster_1172	000453__KU549174_00001	-	-	-	-	-	-	Non-mobilizable
1374	GQ919031.1	-	-	-	-	-	-	-	-	Non-mobilizable
1375	GQ983381.1	rep_cluster_295	001603__JQ340175	-	-	-	-	-	-	Non-mobilizable
1376	GQ983559.1	rep_cluster_1431	000770__GQ983559_00001	MOBP	NC_005793_00073	MPF_T	NC_019378_00044,NC_019378_00008,NC_019378_00006	-	-	Conjugative
1377	GQ984145.1	rep_cluster_318	001629__GQ984145_00009	-	-	-	-	-	-	Non-mobilizable
1378	GQ998872.1	rep_cluster_655	002109__GQ998872_00003	-	-	-	-	-	-	Non-mobilizable
1379	GU066867.1	rep_cluster_444	001788__NC_013448	-	-	-	-	-	-	Non-mobilizable
1380	GU080064.1	-	-	MOBF,MOBP	NC_019255_00001,NC_010042_00002	-	-	-	-	Mobilizable
1381	GU080069.1	-	-	MOBF,MOBP	NC_019255_00001,NC_010042_00002	-	-	-	-	Mobilizable
1382	GU108604.1	-	-	-	-	-	-	-	-	Non-mobilizable
1383	GU128949.1	Inc18	000086__KY579372_00014	MOBV	X92945	MPF_T	NC_013514_00028,NC_014475_00046	MOBV	CP016690	Conjugative
1384	GU144016.1	Inc13	000076__NZ_APAS01000019_00004	MOBV	NC_013534_00010	-	-	-	-	Mobilizable
1385	GU198194.1	rep_cluster_659	002114__GU198194	-	-	-	-	-	-	Non-mobilizable
1386	GU226194.2	-	-	-	-	-	-	-	-	Non-mobilizable
1387	GU228571.2	rep_cluster_1596	000971__GU228572	-	-	-	-	-	-	Non-mobilizable
1388	GU228572.1	rep_cluster_1596	000971__GU228572	-	-	-	-	-	-	Non-mobilizable
1389	GU244485.1	rep_cluster_110	000356__NC_018889_00001	MOBP	NC_014255_00019	-	-	-	-	Mobilizable
1390	GU256055.1	rep_cluster_1152	000433__CP002796_00002	MOBQ	NC_011332_00003	-	-	-	-	Mobilizable
1391	GU256641.1	IncI1	000145__HE610900_00001	MOBP	NC_013728_00087	MPF_I	NC_007365_00035,NC_012487_00131,NC_022371_00084,NC_014843_00041,NC_014843_00033,NC_011754_00109,NC_011754_00087,NC_014843_00047,NC_022992_00098	MOBP	FR821780	Conjugative
1392	GU271942.1	-	-	-	-	-	-	-	-	Non-mobilizable
1393	GU272158.1	-	-	-	-	-	-	-	-	Non-mobilizable
1394	GU322807.1	rep_cluster_41	001733__CP015015	-	-	-	-	-	-	Non-mobilizable
1395	GU322808.1	rep_cluster_16	000977__CP015014	MOBQ	NC_013938_00014	-	-	-	-	Mobilizable
1396	GU363552.1	Inc11	000040__GU363552_00003	-	-	-	-	-	-	Non-mobilizable
1397	GU363949.1	IncFIB,IncFII,IncFIIA	000095__NZ_CP014273_00094,000121__CP024805,000136__AP014877_00014	MOBP	NC_011416_00039	-	-	-	-	Mobilizable
1398	GU371926.1	IncFII,IncFIIA	000121__CP024805,000136__AP014877_00014	MOBF	NC_017627_00068	MPF_F	NC_019094_00090,NC_014615_00033,NC_017639_00094,NC_007675_00027,NC_017054_00096,NC_010488_00021,NC_013437_00116,NC_018966_00040,NC_010409_00124,08-5333_00200,NC_010719_00096	-	-	Conjugative
1399	GU371927.1	IncI1	000145__HE610900_00001	MOBP	NC_019097	MPF_I	NC_019097_00075,NC_019097_00056,NC_019097_00085,NZ_CM001473_00069,NC_023290_00086,NC_015965_00072,NC_022267_00069,NC_019111_00038,NC_022267_00057	MOBP	JN253636	Conjugative
1400	GU371928.1	IncFIIA,IncFIA,IncFII	000136__AP014877_00014,000094__NZ_CP015070_00117,000121__CP024805	MOBF	NC_017627_00068	MPF_F	NC_013437_00116,NC_022651_00077,NC_017054_00096,NC_010488_00021,NC_010409_00124,NC_008460_00107,NC_010719_00097,NC_017639_00094,NC_019094_00090,NC_007675_00027,NC_019037_00027,NC_014384_00086	MOBF	KT754162	Conjugative
1401	GU371929.1	IncN,IncFIIA,IncFIA,IncFII	000155__CP018649,000136__AP014877_00014,000094__NZ_CP015070_00117,000121__CP024805	MOBF,MOBF	NC_017627_00068,NC_015599_00019	MPF_F	NC_017639_00094,NC_014368_00014,NC_007682_00044,NC_010488_00021,NC_013437_00116,NC_008460_00107,NC_011617_00041,NC_010409_00124,NC_022651_00077,NC_008612_00190,08-5333_00200,NC_019094_00090,NC_019037_00027,NC_007675_00027,NC_022375_00024,NC_017054_00096,NC_009131_00030	MOBF,MOBF	NZ_CP012928,KT754162	Conjugative
1402	GU479466.1	rep_cluster_1410	000752__CP002441_00035	MOBP	NC_014105_00043	MPF_T	NC_014105_00044,NC_014105_00026,NC_014105_00024	-	-	Conjugative
1403	GU562625.1	rep_cluster_1230	000530__NC_010626_00002	-	-	-	-	-	-	Non-mobilizable
1404	GU565967.1	rep_cluster_1302	000620__GQ900462	-	-	-	-	-	-	Non-mobilizable
1405	GU569091.1	-	-	-	-	-	-	-	-	Non-mobilizable
1406	GU585907.1	IncN	000155__CP018649	MOBF	NC_015599_00019	MPF_T	NC_003292_00012,NC_014368_00014,NC_007682_00044,NC_008612_00190,NC_022375_00024,NC_007682_00039	MOBF	NZ_CP014320	Conjugative
1407	GU591497.1	rep_cluster_282	001558__HQ128580_00001	-	-	-	-	-	-	Non-mobilizable
1408	GU595196.1	IncFII,IncFIB,IncFII	000130__CP023489,000097__NC_025166_00051,000113__CP022035	MOBF	NC_021231_00058	MPF_F	NC_014312_00128,NC_022609_00081,NC_019389_00068,NC_023332_00154,NC_021502_00150,NC_019165_00034,NC_023905_00125,NC_019389_00080,NC_014312_00116,NC_014312_00118,NC_021654_00016,NC_021502_00131	-	-	Conjugative
1409	GU722199.1	-	-	-	-	-	-	-	-	Non-mobilizable
1410	GU722200.1	rep_cluster_1600	000984__GU722200_00001	-	-	-	-	-	-	Non-mobilizable
1411	GU722201.1	rep_cluster_1557	000925__GU722201_00001	-	-	-	-	-	-	Non-mobilizable
1412	GU811235.1	rep_cluster_1149	000427__GU811235_00024	-	-	-	-	-	-	Non-mobilizable
1413	GU937616.1	ColRNAI_rep_cluster_1991	000022__NC_015392	MOBV,MOBV	NC_005311_00009,NC_022531_00004	-	-	-	-	Mobilizable
1414	GU938458.1	rep_cluster_1443	000785__NC_014113_00026	MOBP	NC_014111_00004	MPF_T	NC_014111_00017,NC_014111_00009,NC_014111_00011,NC_014111_00010,NC_008771_00006	-	-	Conjugative
1415	GU938459.1	rep_cluster_1443	000785__NC_014113_00026	MOBP	NC_014111_00004	MPF_T	NC_014111_00011,NC_014111_00017,NC_008771_00006,NC_014111_00010,NC_014111_00009	-	-	Conjugative
1416	GU949535.1	ColRNAI_rep_cluster_1857	000008__AJ627566	MOBP,MOBP	NC_017321_00002,NC_019076_00002	-	-	MOBP	NC_011754	Mobilizable
1417	HE577112.1	rep_cluster_1527,IncX1	000882__CP012005_00092,000215__KC853434_00019	MOBP	NC_019096_00001	MPF_T	NC_013503_00034,NC_010860_00022,NC_023277_00163,NC_019067_00043,NC_017624_00009	MOBP	GQ900448	Conjugative
1418	HE603111.1	IncFIB,IncFII,IncI1	000095__NZ_CP014273_00094,000121__CP024805,000144__CP015838_00058	-	-	MPF_F	NC_010409_00124,NC_022651_00077,NC_019000_00022	MOBP	NC_021077	Mobilizable
1419	HE603219.1	rep_cluster_1583,rep_cluster_308	000959__NC_001372_00007,001618__CP003964_00004	-	-	-	-	-	-	Non-mobilizable
1420	HE616529.1	IncFIIA,IncFII	000136__AP014877_00014,000121__CP024805	MOBF,MOBP	NC_017627_00068,NC_011416_00039	MPF_Unknown	08-5333_00200	-	-	Conjugative
1421	HE616530.1	ColRNAI_rep_cluster_1857	000008__AJ627566	MOBF	CP019897	-	-	MOB_unknown	CP010128	Mobilizable
1422	HE616531.1	Inc13	000058__CP000643_00001	-	-	-	-	-	-	Non-mobilizable
1423	HE616532.1	rep_cluster_1155	000435__NC_009344_00001	-	-	-	-	-	-	Non-mobilizable
1424	HE616910.2	IncU	000211__KU963389_00011	-	-	-	-	-	-	Non-mobilizable
1425	HE650695.1	rep_cluster_1377	000715__NC_016969_00004	MOBP	NC_016969_00002	-	-	-	-	Mobilizable
1426	HE650696.1	Inc11	000048__NC_016981_00002	MOBV	NC_016981_00005	-	-	-	-	Mobilizable
1427	HE650697.1	rep_cluster_554	001939__AJ550509_00002	-	-	-	-	MOBP	NC_015901	Mobilizable
1428	HE651325.1	rep_cluster_554	001938__AF001314_00001	-	-	-	-	MOBP	NC_002524	Mobilizable
1429	HE651326.1	-	-	MOBP	NC_016982_00015	MPF_T	NC_016982_00029	-	-	Conjugative
1430	HE652087.1	ColRNAI_rep_cluster_1987	000019__CP000651_00005	MOBP	NC_013090_00004	-	-	MOBP	CP018941	Mobilizable
1431	HE662694.1	rep_cluster_1118,rep_cluster_282	000394__NC_020237_00001,001560__NC_020237_00009	MOBP,MOBV	NC_020237_00008,NC_010936_00005	-	-	MOBV	NZ_CP009579	Mobilizable
1432	HE792893.1	rep_cluster_1651	001050__HE792893_00004	-	-	-	-	-	-	Non-mobilizable
1433	HE805623.2	rep_cluster_1230	000530__NC_010626_00002	-	-	-	-	-	-	Non-mobilizable
1434	HE984299.1	rep_cluster_142	000761__HE984299_00008	-	-	-	-	-	-	Non-mobilizable
1435	HF545435.1	IncN	000155__CP018649	MOBF	NC_015599_00019	MPF_T	NC_009131_00030,NC_011617_00041,NC_022375_00024	MOBF	NZ_CP016498	Conjugative
1436	HF560649.1	rep_cluster_1099	000354__NC_018978_00001	-	-	-	-	-	-	Non-mobilizable
1437	HF565445.2	ColRNAI_rep_cluster_1857	000008__AJ627566	MOBP	NC_020251_00005	-	-	MOBP	MF083142	Mobilizable
1438	HF565446.1	ColRNAI_rep_cluster_1291	000002__NC_009781	MOBQ	NZ_AWFJ01000122_00007	-	-	MOBQ,MOBQ	NZ_CP009767,DQ318958	Mobilizable
1439	HF570055.1	rep_cluster_50	001871__HF570055	-	-	-	-	-	-	Non-mobilizable
1440	HF570109.1	ColRNAI_rep_cluster_1291	000002__NC_009781	MOBQ	NZ_AWFJ01000122_00007	-	-	MOBQ,MOBQ	DQ318958,NZ_CP009767	Mobilizable
1441	HF570110.1	ColRNAI_rep_cluster_1857	000008__AJ627566	-	-	-	-	MOBP	MF083142	Mobilizable
1442	HF572032.1	IncI1	000145__HE610900_00001	MOBP	NC_019097	MPF_I	NZ_CM001473_00069,NC_015965_00072,NC_023290_00086,NC_019097_00085,NC_022267_00057,NC_019097_00075,NC_022267_00069,NC_019111_00038,NC_019097_00056	MOBP	HM021326	Conjugative
1443	HF679279.1	rep_cluster_995	002480__NC_019220_00009	MOBQ	NC_020452_00007	MPF_T	NC_022242_00031	-	-	Conjugative
1444	HF913787.1	ColRNAI_rep_cluster_1956	000015__JX514065	-	-	-	-	-	-	Non-mobilizable
1445	HF913788.1	ColRNAI_rep_cluster_1956	000015__JX514065	-	-	-	-	-	-	Non-mobilizable
1446	HF922624.1	IncFIB,IncFIIA,IncFII	000095__NZ_CP014273_00094,000136__AP014877_00014,000121__CP024805	-	-	MPF_F	NZ_CM001154_00091,NC_022651_00077	MOBP	GU128949	Mobilizable
1447	HF955507.1	IncN	000155__CP018649	MOBF	NC_015599_00019	MPF_T	NC_014368_00014,NC_022375_00024,NC_011617_00041,NC_009131_00030,NC_008612_00190,NC_007682_00044	MOBF	NZ_CP015239	Conjugative
1448	HF969016.1	IncFIB,IncFII	000101__NZ_CP012345_00042,000114__CP015527	MOBF	NC_007208_00043	MPF_F	NC_019002_00072,NC_014615_00033,NZ_CM001063_00039,NC_017054_00095,NC_003277_00107,NC_022651_00077,NC_017054_00096,NC_017054_00098,NC_019094_00090,NC_013437_00116,NC_019112_00063,NC_017054_00100	-	-	Conjugative
1449	HG323816.1	-	-	-	-	-	-	-	-	Non-mobilizable
1450	HG380317.1	rep_cluster_1947	001391__NC_019143_00002	-	-	-	-	-	-	Non-mobilizable
1451	HG380318.1	Inc11	000054__HG380318_00002	-	-	-	-	-	-	Non-mobilizable
1452	HG380319.1	rep_cluster_1442,rep_cluster_910	000784__NC_007171_00001,002395__NC_013387_00031	MOBP,MOBV	NC_006663_00031,NC_022618_00010	-	-	MOBV	NZ_CP009579	Mobilizable
1453	HG422566.1	rep_cluster_1659	001060__HG422566_00001	MOBC	NC_018606_00033	-	-	-	-	Mobilizable
1454	HG530657.1	rep_cluster_488	001852__AP017612_00001	-	-	-	-	-	-	Non-mobilizable
1455	HG803186.1	rep_cluster_1601	000985__HG803186_00080	-	-	-	-	-	-	Non-mobilizable
1456	HG813238.1	rep_cluster_698	002164__HG813238_00001	MOBP	NC_023072_00039	MPF_I	NC_023072_00077,NC_023072_00057,NC_023072_00061,NC_023072_00089,NC_023072_00066,NC_023072_00063	-	-	Conjugative
1457	HG813239.1	rep_cluster_1099	000354__NC_018978_00001	-	-	-	-	-	-	Non-mobilizable
1458	HG918041.1	rep_cluster_1150,IncH	000430__CP020850,000137__CP017986_00041	MOBH	NC_016980_00239	MPF_F	NC_023911_00309,NC_016980_00240,NC_016980_00099,NC_016980_00110,NC_018107_00101,NC_018107_00235,NC_016980_00109	-	-	Conjugative
1459	HG934082.1	IncL/M	000148__NC_021488_00028	MOBP	NC_004464_00056	MPF_I	NC_004464_00073,NC_005246_00069,NC_019344_00078,NC_004464_00068,NC_004464_00066,NC_004464_00105,NC_005246_00057,NC_019063_00094,NC_019154_00069	-	-	Conjugative
1460	HG963476.1	IncR	000204__CP008701_00115	MOBP	NC_021576_00050	-	-	-	-	Mobilizable
1461	HG963477.1	IncX1	000215__KC853434_00019	MOBP	NC_019096_00001	MPF_T	NC_019067_00043,NC_010860_00022,NC_023277_00163,NC_019138_00026,NC_017624_00009	-	-	Conjugative
1462	HG969995.1	IncFII,IncFIB,IncFII	000130__CP023489,000097__NC_025166_00051,000113__CP022035	MOBF	NC_021231_00058	MPF_F	NC_021502_00131,NC_021654_00016,NC_014312_00116,NC_022609_00081,NC_019389_00080,NC_014312_00128,NC_019389_00068,NC_014312_00118,NC_023332_00154,NC_021502_00150,NC_019165_00034,NC_023905_00125	-	-	Conjugative
1463	HG969996.1	IncR,IncFII,IncFII	000204__CP008701_00115,000132__HG969996,000113__CP022035	MOBF	NC_021231_00058	MPF_F	NC_021654_00004,NC_021654_00016,NC_023332_00154,NC_021502_00131,NC_014312_00118,NC_023905_00125,NC_021502_00150,NC_019389_00080,NC_022609_00081,NC_014312_00128,NC_019165_00034,NC_014312_00116	-	-	Conjugative
1464	HG969997.1	IncFIB,IncFII,IncFII	000097__NC_025166_00051,000113__CP022035,000130__CP023489	MOBF	NC_021231_00058	MPF_F	NC_014312_00128,NC_023905_00125,NC_021502_00131,NC_019389_00068,NC_021502_00150,NC_019165_00034,NC_014312_00118,NC_022609_00081,NC_021654_00016,NC_014312_00116,NC_019389_00080,NC_023332_00154	-	-	Conjugative
1465	HG969998.1	IncFII,IncFIB,IncFII	000130__CP023489,000097__NC_025166_00051,000113__CP022035	MOBF	NC_021231_00058	MPF_F	NC_014312_00118,NC_014312_00128,NC_019389_00068,NC_019165_00034,NC_021654_00016,NC_021502_00150,NC_021502_00131,NC_022609_00081,NC_023332_00154,NC_019389_00080,NC_023905_00125	-	-	Conjugative
1466	HG969999.1	IncFIB	000097__NC_025166_00051	-	-	MPF_F	NC_019389_00068,NC_014312_00118,NC_014312_00116,NC_023332_00154	-	-	Non-mobilizable
1467	HG970000.1	IncFII,IncFIB	000114__CP015527,000101__NZ_CP012345_00042	-	-	MPF_F	NC_019094_00090,NC_019002_00076,NC_019002_00072,NC_022651_00077	-	-	Non-mobilizable
1468	HG970001.1	IncFII	000114__CP015527	MOBF	NC_007208_00043	MPF_F	NC_017054_00096,NZ_CM001154_00067,NC_017054_00098,NC_019094_00090,NC_017054_00095,NC_019002_00072,NC_022651_00077,NC_019112_00063,NC_017054_00100,NZ_CM001063_00039,NC_013437_00116	-	-	Conjugative
1469	HG970648.1	IncI1	000145__HE610900_00001	MOBP	NC_019097	MPF_I	NZ_CM001473_00069,NC_019097_00075,NC_022267_00057,NC_019097_00085,NC_022267_00069,NC_023290_00086,NC_019097_00056,NC_019111_00038,NC_015965_00072	MOBP	JN253636	Conjugative
1470	HG983279.1	rep_cluster_1822,rep_cluster_1445	001241__NC_011316_00001,000788__HG983280	MOBP	NC_011315_00002	-	-	-	-	Mobilizable
1471	HG983280.1	rep_cluster_1445	000788__HG983280	MOBP	NC_011315_00002	-	-	-	-	Mobilizable
1472	HM003572.1	Inc13	000081__NC_011363_00001	-	-	-	-	-	-	Non-mobilizable
1473	HM008709.2	-	-	-	-	-	-	-	-	Non-mobilizable
1474	HM021329.1	rep_cluster_667,rep_cluster_798	002127__CP016693_00001,002275__CP016694	MOBP,MOB_Unknown	NC_017484_00003,JQ821353	-	-	-	-	Mobilizable
1475	HM037272.1	rep_cluster_1721,rep_cluster_484	001137__CP004861,001844__CP010580	MOBQ	NC_011337_00008	-	-	-	-	Mobilizable
1476	HM050421.1	rep_cluster_1188	000474__NC_019232_00001	-	-	-	-	-	-	Non-mobilizable
1477	HM050422.1	rep_cluster_1188	000474__NC_019232_00001	-	-	-	-	-	-	Non-mobilizable
1478	HM102370.1	-	-	-	-	-	-	-	-	Non-mobilizable
1479	HM114217.1	rep_cluster_1307	000625__KX443392	MOBF	NC_014247_00013	MPF_T	NC_002576_00039	-	-	Conjugative
1480	HM125987.1	rep_cluster_60	002037__HM125987_00001	-	-	-	-	-	-	Non-mobilizable
1481	HM125988.1	Inc11	000035__NC_014162_00001	-	-	-	-	-	-	Non-mobilizable
1482	HM125989.1	rep_cluster_1762	001181__NC_014163_00001	-	-	-	-	-	-	Non-mobilizable
1483	HM138194.1	IncFIB,IncI1	000095__NZ_CP014273_00094,000145__HE610900_00001	MOBP,MOBP	NC_011416_00039,NC_013728_00087	-	-	MOBP	CP018984	Mobilizable
1484	HM138653.1	IncN	000153__NC_019087_00001	MOBF	NC_015599_00019	MPF_T	NC_007682_00044,NC_022375_00024,NC_011617_00041,NC_009131_00030,NC_014368_00014,NC_008612_00190	MOBF	NZ_CP015131	Conjugative
1485	HM197723.1	rep_cluster_554,rep_cluster_1699	001939__AJ550509_00002,001107__JN225497_00005	MOBP,MOB_Unknown,MOBP	NC_019377_00008,JQ821353,NC_017484_00003	-	-	MOBP	CP016728	Mobilizable
1486	HM231165.1	rep_cluster_404	001725__HM231165	MOBP	NC_014354_00003	-	-	-	-	Mobilizable
1487	HM235948.1	rep_cluster_1827	001247__NC_010875_00002	MOBV	NC_010875_00006	-	-	-	-	Mobilizable
1488	HM236408.1	-	-	MOBP,MOBF	NC_010042_00002,NC_019255_00001	-	-	-	-	Mobilizable
1489	HM355591.2	IncFIIA,IncFII	000136__AP014877_00014,000121__CP024805	MOBF	NC_017627_00068	MPF_F	08-5333_00200,NC_007675_00027,NC_008460_00107,NC_019094_00090,NC_017054_00096,NC_010409_00124,NC_018966_00040,NC_010719_00097,NC_017639_00094,NC_019094_00068,NC_013437_00116,NC_022651_00077	MOBF	CP019007	Conjugative
1490	HM371192.1	ColRNAI_rep_cluster_1987	000019__CP000651_00005	-	-	-	-	MOBP	AJ001708	Mobilizable
1491	HM470204.1	-	-	MOBP,MOBF	NC_010042_00002,NC_019255_00001	-	-	-	-	Mobilizable
1492	HM486907.1	-	-	MOBF,MOBP	NC_019255_00001,NC_019214_00002	-	-	-	-	Mobilizable
1493	HM560024.1	rep_cluster_343	001658__HM560024	-	-	-	-	-	-	Non-mobilizable
1494	HM560025.1	rep_cluster_1786	001213__HM560025_00001	-	-	-	-	-	-	Non-mobilizable
1495	HM560026.1	rep_cluster_1496	000833__HM560026_00001	-	-	-	-	-	-	Non-mobilizable
1496	HM560027.1	rep_cluster_127	000584__HM560027	-	-	-	-	-	-	Non-mobilizable
1497	HM560028.1	rep_cluster_1530	000893__HM560028_00001	-	-	-	-	-	-	Non-mobilizable
1498	HM560029.1	rep_cluster_127	000583__HM560029	-	-	-	-	-	-	Non-mobilizable
1499	HM560030.1	rep_cluster_338	001652__HM560030	-	-	-	-	-	-	Non-mobilizable
1500	HM560031.1	-	-	-	-	-	-	-	-	Non-mobilizable
1501	HM560971.1	rep_cluster_322	001633__HM560971	MOBH	NC_019202_00108	MPF_G	NC_019202_00037,NC_019202_00087,NC_019202_00095,NC_019202_00086,NC_019202_00083,NC_019202_00094,NC_019202_00074	-	-	Conjugative
1502	HM590571.1	rep_cluster_1681	001083__HM590571_00007	-	-	-	-	-	-	Non-mobilizable
1503	HM622074.1	-	-	-	-	-	-	-	-	Non-mobilizable
1504	HM626202.1	rep_cluster_398	001720__CP003962	-	-	MPF_I	NC_015855_00072,NC_015855_00005,NC_015855_00068,NC_015855_00065,NC_015855_00013,NC_015855_00139,NC_015855_00067,NC_015855_00064	-	-	Non-mobilizable
1505	HM748980.1	rep_cluster_1077	000325__NC_017023_00001	MOBV	NC_017023_00004	-	-	-	-	Mobilizable
1506	HM807366.1	ColRNAI_rep_cluster_1857	000008__AJ627566	-	-	-	-	MOBP	NC_017657	Mobilizable
1507	HM807367.1	ColRNAI_rep_cluster_1857	000008__AJ627566	-	-	-	-	MOBP	NC_017657	Mobilizable
1508	HM991869.1	rep_cluster_1434	000775__NC_017213	-	-	-	-	-	-	Non-mobilizable
1509	HQ015473.1	rep_cluster_1766	001185__NC_014936_00001	-	-	-	-	-	-	Non-mobilizable
1510	HQ023861.1	rep_cluster_1254,IncA/C2	000562__KT346360_00001,000092__CP025470	MOBH	NC_012885_00072	MPF_F	NC_012885_00091,NC_012885_00083,NC_012885_00167,NC_012885_00088,NC_023291_00077,NC_016974_00085,NC_009140_00071,NC_014170_00023	-	-	Conjugative
1511	HQ114281.1	IncI1	000145__HE610900_00001	MOBP	NC_019097	MPF_I	NC_022267_00057,NC_019097_00056,NC_019111_00038,NC_022267_00069,NC_019097_00075,NC_019097_00085,NC_015965_00072,NC_023290_00086,NZ_CM001473_00069	MOBP	HM021326	Conjugative
1512	HQ114282.1	IncI1	000145__HE610900_00001	MOBP,MOBP	NC_019097,NC_011416_00039	MPF_I	NC_022267_00069,NC_019097_00075,NC_022267_00057,NC_023290_00086,NZ_CM001473_00069,NC_015965_00072,NC_019097_00056,NC_019111_00038,NC_019097_00085	MOBP	JN253636	Conjugative
1513	HQ114283.1	IncI1	000145__HE610900_00001	MOBP	NC_019097	MPF_I	NC_019097_00075,NC_022267_00057,NZ_CM001473_00069,NC_022267_00069,NC_019097_00056,NC_023290_00086,NC_015965_00072,NC_019111_00038,NC_019097_00085	MOBP	HM021326	Conjugative
1514	HQ114284.1	IncI1	000144__CP015838_00058	MOBP,MOBP	NC_011416_00039,NC_019097	MPF_I	NC_015965_00072,NZ_CM001473_00069,NC_022267_00057,NC_019097_00075,NC_022267_00069,NC_023290_00086,NC_019097_00085,NC_019111_00038	MOBP	JN253636	Conjugative
1515	HQ115078.1	rep_cluster_889	002366__KY595966_00031	-	-	-	-	-	-	Non-mobilizable
1516	HQ128580.1	rep_cluster_282	001558__HQ128580_00001	-	-	-	-	-	-	Non-mobilizable
1517	HQ156229.1	-	-	-	-	MPF_F	NC_002757_00002	-	-	Non-mobilizable
1518	HQ156230.1	-	-	-	-	MPF_F	NC_002757_00002	-	-	Non-mobilizable
1519	HQ170520.3	rep_cluster_1017,rep_cluster_1281	000259__NC_013375_00001,000596__HQ170521_00001	MOBC	NC_004669_00010	-	-	-	-	Mobilizable
1520	HQ170521.1	rep_cluster_1281	000596__HQ170521_00001	MOBC	NC_004669_00010	-	-	-	-	Mobilizable
1521	HQ173810.1	Inc11	000052__NC_004985_00004	MOBV	NC_017466_00002	-	-	-	-	Mobilizable
1522	HQ201416.1	ColRNAI_rep_cluster_1291	000002__NC_009781	MOBQ	NC_019062_00002	-	-	-	-	Mobilizable
1523	HQ202266.1	IncFIB,IncFII,IncFII	000107__CP014778_00094,000129__CP018340,000113__CP022035	MOBF	NC_021231_00058	MPF_F	NC_014312_00128,NC_019389_00080,NC_019389_00068,NC_022609_00081,NC_014312_00116,NC_021502_00131,NC_023332_00154,NC_014312_00118,NC_019165_00034,NC_019155_00032,NC_021502_00150,NC_021654_00016	-	-	Conjugative
1524	HQ230976.1	ColRNAI_rep_cluster_1857	000008__AJ627566	-	-	-	-	MOB_unknown,MOBP	NC_019986,CP010136	Mobilizable
1525	HQ230977.1	ColRNAI_rep_cluster_1857	000008__AJ627566	-	-	-	-	MOBP,MOB_unknown	CP010136,NC_019986	Mobilizable
1526	HQ259051.1	rep_cluster_1298	000615__HQ259051_00002	-	-	-	-	-	-	Non-mobilizable
1527	HQ259052.1	rep_cluster_1485	000823__NC_003458_00004	-	-	-	-	-	-	Non-mobilizable
1528	HQ332527.1	rep_cluster_674	002141__HQ332527	-	-	-	-	-	-	Non-mobilizable
1529	HQ332528.1	rep_cluster_674	002134__HQ332528	-	-	-	-	-	-	Non-mobilizable
1530	HQ332529.1	rep_cluster_674	002135__HQ332529	-	-	-	-	-	-	Non-mobilizable
1531	HQ332530.1	rep_cluster_674	002140__HQ332530	-	-	-	-	-	-	Non-mobilizable
1532	HQ332531.1	rep_cluster_674	002134__HQ332528	-	-	-	-	-	-	Non-mobilizable
1533	HQ332785.1	IncFIB	000107__CP014778_00094	MOBC	NC_014725_00039	MPF_T	NC_011092_00103,NC_011092_00100,NC_011092_00102	-	-	Conjugative
1534	HQ404303.1	ColRNAI_rep_cluster_1987	000019__CP000651_00005	MOBP	NC_019076_00002	-	-	MOBP	NC_011214	Mobilizable
1535	HQ540671.1	-	-	-	-	-	-	-	-	Non-mobilizable
1536	HQ540672.1	ColRNAI_rep_cluster_1956	000015__JX514065	-	-	-	-	-	-	Non-mobilizable
1537	HQ622575.1	ColRNAI_rep_cluster_1857	000009__CP017845	MOBF	CP019897	-	-	MOB_unknown	CP017722	Mobilizable
1538	HQ622576.1	ColRNAI_rep_cluster_1857	000009__CP017845	MOBP	NC_019076_00002	-	-	MOBP	NZ_CP011019	Mobilizable
1539	HQ622718.1	Inc13	000059__FN394966_00002	MOBV	NC_014919_00004	-	-	-	-	Mobilizable
1540	HQ624979.1	rep_cluster_1505	000847__HQ624979_00002	-	-	-	-	-	-	Non-mobilizable
1541	HQ637382.1	rep_cluster_674	002136__CP000065	-	-	-	-	-	-	Non-mobilizable
1542	HQ646604.1	rep_cluster_516	001891__NC_017494_00001	-	-	-	-	-	-	Non-mobilizable
1543	HQ659758.1	ColRNAI_rep_cluster_1857	000008__AJ627566	-	-	-	-	MOB_unknown,MOBP	NC_019986,KX712120	Mobilizable
1544	HQ693810.1	-	-	-	-	-	-	-	-	Non-mobilizable
1545	HQ696461.1	rep_cluster_1742	001161__HQ696461_00001	MOBP	NC_019240_00008	-	-	-	-	Mobilizable
1546	HQ833018.1	rep_cluster_1092	000343__NC_015509_00001	MOBV	NC_015509_00005	-	-	-	-	Mobilizable
1547	HQ834472.1	ColRNAI_rep_cluster_1956	000015__JX514065	-	-	-	-	-	-	Non-mobilizable
1548	HQ834473.1	ColRNAI_rep_cluster_1956	000015__JX514065	-	-	-	-	-	-	Non-mobilizable
1549	HQ848325.1	ColRNAI_rep_cluster_1857	000008__AJ627566	MOBF	CP019897	-	-	MOB_unknown	NZ_CP008845	Mobilizable
1550	HQ891317.1	IncP	000180__NC_006830_00001	MOBP	NC_007353_00011	MPF_T	NC_006830_00008,NC_007353_00043,NC_019318_00040,NC_006830_00009	MOBP	NC_021664	Conjugative
1551	J01566.1	ColRNAI_rep_cluster_1857	000008__AJ627566	MOBP	NC_019076_00002	-	-	MOBP	MF083142	Mobilizable
1552	J01764.1	rep_cluster_1118	000377__NC_001763_00002	MOBV	NC_010262_00002	-	-	-	-	Mobilizable
1553	J03319.1	rep_cluster_689	002155__NC_001370_00001	-	-	-	-	-	-	Non-mobilizable
1554	J03321.1	rep_cluster_308,rep_cluster_1583	001618__CP003964_00004,000959__NC_001372_00007	-	-	-	-	-	-	Non-mobilizable
1555	J04240.1	-	-	-	-	-	-	-	-	Non-mobilizable
1556	JF267651.1	IncA/C2	000092__CP025470	MOBH	NC_012885_00072	MPF_F	NC_023291_00077,NC_009140_00071,NC_016974_00085,NC_012885_00083,NC_012885_00167,NC_012885_00091,NC_014170_00023	MOBH	JQ319772	Conjugative
1557	JF267654.1	Inc13	000077__AJ577854_00009	MOBV,MOBV	NZ_AKYF01000029_00006,NZ_ANIP01000001_00004	-	-	-	-	Mobilizable
1558	JF274987.1	IncP	000180__NC_006830_00001	MOBP	NC_007353_00011	MPF_T	NC_006830_00009,NC_006830_00008,NC_019318_00040,NC_007353_00043	MOBP	NC_021664	Conjugative
1559	JF274988.1	IncP	000180__NC_006830_00001	MOBP	NC_007353_00011	MPF_T	NC_019318_00040,NC_006830_00008,NC_006830_00009,NC_007353_00043	MOBP	NC_021664	Conjugative
1560	JF274989.1	IncP	000179__NC_001735_00020	MOBP	NC_016978_00054	MPF_T	NC_007353_00043,NC_006830_00009,NC_019318_00040,NC_006830_00008	MOBP	NZ_CP009107	Conjugative
1561	JF274990.2	IncP	000180__NC_006830_00001	MOBP	NC_007353_00011	MPF_T	NC_019318_00040,NC_006830_00009,NC_007353_00043,NC_006830_00008	MOBP	NC_021664	Conjugative
1562	JF274991.1	IncFII	000114__CP015527	MOBF	NC_007208_00043	MPF_F	NC_019002_00072,NC_022651_00077,NC_017054_00100,NC_017054_00096,NC_017054_00095,NC_019094_00090,NC_017054_00098,NC_003277_00107,NC_013437_00116,NZ_CM001063_00039,NC_019112_00063,NC_014615_00033	-	-	Conjugative
1563	JF274992.1	IncFIB,IncFII	000095__NZ_CP014273_00094,000114__CP015527	MOBF	NC_007208_00043	MPF_F	NC_019002_00072,NC_017054_00095,NC_019112_00063,NZ_CM001063_00039,NC_013437_00116,NC_017054_00100,NC_022651_00077,NC_017054_00098,NC_014615_00033,NC_003277_00107,NC_017054_00096,NC_019094_00090	-	-	Conjugative
1564	JF274993.1	IncI1	000145__HE610900_00001	MOBP	NC_019097	MPF_I	NC_023290_00086,NC_022267_00069,NC_022267_00057,NC_019097_00056,NC_019097_00075,NZ_CM001473_00069,NC_019097_00085,NC_015965_00072,NC_019111_00038	MOBP	HM021326	Conjugative
1565	JF308629.1	Inc11	000046__NC_019252_00004	MOBP	NC_010423_00006	-	-	-	-	Mobilizable
1566	JF308630.1	Inc11	000046__NC_019252_00004	MOBP	NC_010423_00006	-	-	-	-	Mobilizable
1567	JF436966.1	ColRNAI_rep_cluster_1885	000013__DQ995351_00001	-	-	-	-	-	-	Non-mobilizable
1568	JF699753.1	-	-	-	-	-	-	-	-	Non-mobilizable
1569	JF703130.1	ColRNAI_rep_cluster_1987	000019__CP000651_00005	-	-	-	-	-	-	Non-mobilizable
1570	JF714412.2	IncA/C2	000092__CP025470	MOBH	NC_012885_00072	MPF_F	NC_023291_00077,NC_014170_00023,NC_012885_00088,NC_012885_00091,NC_012885_00167,NC_012885_00083,NC_016974_00085,NC_009140_00071	-	-	Conjugative
1571	JF779678.1	IncFIIA,IncFII	000136__AP014877_00014,000121__CP024805	MOBF	NC_017627_00068	MPF_F	NC_018966_00040,NC_007675_00027,NC_010719_00096,NC_013437_00116,NC_010409_00124,NC_019072_00073,NC_019094_00090,NC_010719_00097,NC_022651_00077,NC_017054_00096,NC_017639_00094,NC_019094_00068	MOBF	CP019842	Conjugative
1572	JF785549.1	IncN	000151__NC_019163_00001	MOBF	NC_015872_00034	MPF_T	NC_015872_00006,NC_015872_00010,NC_015872_00007,NC_015872_00005,NC_015872_00033,NC_015872_00011	-	-	Conjugative
1573	JF785550.1	IncP	000172__KU578314_00001	-	-	-	-	-	-	Non-mobilizable
1574	JF795024.1	ColRNAI_rep_cluster_1857	000004__DQ298019	MOBP	NC_016151_00005	-	-	MOBP	NC_017536	Mobilizable
1575	JF800907.1	rep_cluster_185	001274__DQ198088_00024	MOBV	NC_022618_00010	-	-	-	-	Mobilizable
1576	JF807312.1	-	-	-	-	-	-	-	-	Non-mobilizable
1577	JF809815.1	-	-	MOBQ	NC_021209_00091	MPF_T	NC_021209_00088,NC_021209_00106,NC_021209_00111	-	-	Conjugative
1578	JF813186.1	ColRNAI_rep_cluster_1885	000013__DQ995351_00001	-	-	-	-	MOBP,MOB_unknown	CP001386,GQ900404	Mobilizable
1579	JF813187.1	ColRNAI_rep_cluster_1987	000019__CP000651_00005	-	-	-	-	MOB_unknown,MOBP	NC_019986,NC_023324	Mobilizable
1580	JF813188.1	ColRNAI_rep_cluster_1857	000008__AJ627566	MOBP	NC_020251_00005	-	-	MOBP	NC_008697	Mobilizable
1581	JF827298.1	rep_cluster_594	002022__JF827298	-	-	-	-	-	-	Non-mobilizable
1582	JF834909.1	-	-	-	-	-	-	-	-	Non-mobilizable
1583	JF834910.1	-	-	-	-	-	-	-	-	Non-mobilizable
1584	JF834911.2	rep_cluster_1018	000268__U32369_00002	MOBV	NC_005076_00012	-	-	-	-	Mobilizable
1585	JF927996.1	IncFIIA,IncFII	000136__AP014877_00014,000121__CP024805	MOBF	NC_017627_00068	MPF_F	NC_010409_00124,NC_022651_00077,NC_019094_00090,NC_018966_00040,NC_019094_00068,NC_013437_00116,NC_008460_00107,08-5333_00200,NC_010719_00097,NC_017639_00094,NC_017054_00096	MOBP	AP014804	Conjugative
1586	JF937655.1	ColRNAI_rep_cluster_1999	000030__JF937655	MOBP	NC_019269_00003	-	-	-	-	Mobilizable
1587	JF968540.1	rep_cluster_1018	000268__U32369_00002	MOBV	NC_022618_00010	-	-	-	-	Mobilizable
1588	JF968541.1	-	-	-	-	-	-	-	-	Non-mobilizable
1589	JF968542.1	rep_cluster_1947	001391__NC_019143_00002	-	-	-	-	-	-	Non-mobilizable
1590	JN087528.1	IncFIIA,IncFII	000136__AP014877_00014,000121__CP024805	MOBF	NC_017627_00068	MPF_F	NC_019094_00090,NC_010409_00124,NC_017054_00096,NC_022651_00077,NC_010719_00097,NC_007675_00027,NC_013437_00116,NC_008460_00107,NC_019094_00068,NC_017639_00094,NC_018966_00040	MOBF	CP019007	Conjugative
1591	JN087529.1	IncFII,IncFIIA	000121__CP024805,000136__AP014877_00014	MOBF	NC_017627_00068	MPF_F	NC_019094_00090,NC_008460_00107,NC_017054_00096,NC_007675_00027,NC_019072_00073,NC_022651_00077,NC_019094_00068,NC_010409_00124,NC_017639_00094,NC_010719_00097,NC_013437_00116,NC_018966_00040	MOBF	CP019007	Conjugative
1592	JN093097.1	-	-	-	-	-	-	-	-	Non-mobilizable
1593	JN102341.1	IncN	000155__CP018649	MOBF	NC_015599_00019	MPF_T	NC_008612_00190,NC_011617_00041,NC_009131_00030,NC_022375_00024,NC_007682_00044,NC_014368_00014	MOBF	NZ_CP013027	Conjugative
1594	JN102342.1	IncN	000155__CP018649	MOBF	NC_015599_00019	MPF_T	NC_014368_00014,NC_008612_00190,NC_022375_00024,NC_007682_00044,NC_009131_00030,NC_011617_00041	MOBF	NZ_CP013027	Conjugative
1595	JN102343.1	IncN	000155__CP018649	MOBF	NC_015599_00019	MPF_T	NC_009131_00030,NC_011617_00041,NC_022375_00024,NC_008612_00190,NC_007682_00044,NC_014368_00014	MOBF	NZ_CP013027	Conjugative
1596	JN102344.1	IncN	000155__CP018649	MOBF	NC_015599_00019	MPF_T	NC_009131_00030,NC_022375_00024,NC_014368_00014,NC_007682_00044,NC_008612_00190,NC_011617_00041	MOBF	NZ_CP013027	Conjugative
1597	JN106164.1	IncP	000179__NC_001735_00020	MOBP	NC_001735_00050	MPF_T	NC_019318_00059,NC_004956_00085,NC_001735_00049,NC_008459_00022	MOBP	NZ_CP015141	Conjugative
1598	JN106165.1	IncP	000179__NC_001735_00020	MOBP	NC_001735_00050	MPF_T	NC_001735_00049,NC_008459_00022,NC_004956_00085,NC_019318_00059	MOBP	NZ_CP009107	Conjugative
1599	JN106166.1	IncP	000179__NC_001735_00020	MOBP	NC_001735_00050	MPF_T	NC_008459_00022,NC_019318_00059,NC_004956_00085,NC_001735_00049	MOBP	NZ_CP009107	Conjugative
1600	JN106167.1	IncP	000174__JN106175_00001	MOBP	NC_019318_00039	MPF_T	NC_019318_00040,NC_019318_00059,NC_019318_00058,NC_019318_00057	MOBP	NC_005003	Conjugative
1601	JN106168.1	IncP	000179__NC_001735_00020	MOBP	NC_001735_00050	MPF_T	NC_019318_00059,NC_008459_00022,NC_001735_00049,NC_004956_00085	MOBP	NZ_CP009107	Conjugative
1602	JN106169.1	IncP	000179__NC_001735_00020	MOBP	NC_001735_00050	MPF_T	NC_004956_00085,NC_001735_00049,NC_008459_00022,NC_019318_00059	MOBP	NZ_CP009107	Conjugative
1603	JN106170.1	IncP	000174__JN106175_00001	MOBP	NC_019318_00039	MPF_T	NC_019318_00058,NC_019318_00057,NC_019318_00059,NC_019318_00040	MOBP	NC_005003	Conjugative
1604	JN106171.1	IncP	000180__NC_006830_00001	MOBP	NC_007353_00011	MPF_T	NC_006830_00008,NC_019318_00040,NC_006830_00009,NC_007353_00043	MOBP	NC_021664	Conjugative
1605	JN106172.1	IncP	000179__NC_001735_00020	MOBP	NC_001735_00050	MPF_T	NC_019318_00059,NC_008459_00022,NC_004956_00085,NC_001735_00049	MOBP	NZ_CP009107	Conjugative
1606	JN106173.1	IncP	000179__NC_001735_00020	MOBP	NC_001735_00050	MPF_T	NC_019318_00059,NC_008459_00022,NC_001735_00049,NC_004956_00085	MOBP	NZ_CP009107	Conjugative
1607	JN106174.1	IncP	000179__NC_001735_00020	MOBP	NC_001735_00050	MPF_T	NC_008459_00022,NC_004956_00085,NC_019318_00059,NC_001735_00049	MOBP	NZ_CP009107	Conjugative
1608	JN106175.1	IncP	000174__JN106175_00001	MOBP	NC_019318_00039	MPF_T	NC_019318_00057,NC_019318_00040,NC_019318_00059,NC_019318_00058	MOBP	NC_005003	Conjugative
1609	JN106352.1	rep_cluster_589	002013__JN106352_00013	MOBV	NC_016820_00021	-	-	-	-	Mobilizable
1610	JN119829.1	-	-	-	-	MPF_T	NC_016040_00046	-	-	Non-mobilizable
1611	JN119830.1	-	-	-	-	MPF_T	NC_016040_00041,NC_016040_00046	-	-	Non-mobilizable
1612	JN157804.1	IncA/C2	000092__CP025470	MOBH	NC_012885_00072	MPF_F	NC_012885_00091,NC_012885_00167,NC_014170_00023,NC_012885_00088,NC_016974_00085,NC_012885_00083,NC_023291_00077,NC_009140_00071	MOBH	HG428760	Conjugative
1613	JN172910.1	rep_cluster_661	002120__JN172910_00016	-	-	-	-	MOBP	LT599052	Mobilizable
1614	JN172911.1	rep_cluster_656	002110__KM007160_00048	-	-	-	-	-	-	Non-mobilizable
1615	JN172912.1	rep_cluster_556	001949__JN172912	MOBP	NC_019350_00002	-	-	MOBP	CP016854	Mobilizable
1616	JN172926.1	rep_cluster_606	002050__NC_019362_00001	-	-	-	-	-	-	Non-mobilizable
1617	JN180627.1	rep_cluster_736	002214__JN180627_00016	MOBQ	NC_016000_00002	MPF_T	NC_016000_00017	-	-	Conjugative
1618	JN202624.1	rep_cluster_1875,rep_cluster_337	001311__EU715370_00012,001651__FJ947048	MOBP	NC_019361_00015	-	-	-	-	Mobilizable
1619	JN225497.1	rep_cluster_1699	001107__JN225497_00005	MOB_Unknown,MOBP	JQ821353,NC_019377_00008	-	-	-	-	Mobilizable
1620	JN233704.1	IncFII,IncFIB,IncFII	000132__HG969996,000107__CP014778_00094,000113__CP022035	MOBF	NC_021231_00058	MPF_F	NC_023332_00154,NC_014312_00128,NC_014312_00118,NC_019389_00068,NC_021654_00016,NC_022609_00081,NC_021502_00150,NC_019165_00034,NC_023905_00125,NC_019389_00080,NC_021502_00131	-	-	Conjugative
1621	JN247852.1	IncX3	000221__NC_025130_00012	MOBP	NC_020552_00059	MPF_T	NC_019157_00030,NC_019157_00029,NC_023277_00163,NC_019083_00030,NC_017624_00009	-	-	Conjugative
1622	JN247853.1	ColRNAI_rep_cluster_1857	000003__NC_002119_00001	MOBC	NC_009793_00003	-	-	-	-	Mobilizable
1623	JN248563.1	rep_cluster_1907	001343__AB237655	MOBF	NC_012674_00085	MPF_T	NC_007926_00096,NC_004999_00101,NC_007926_00094,NC_007926_00095,NC_007926_00034	-	-	Conjugative
1624	JN315882.1	-	-	-	-	-	-	-	-	Non-mobilizable
1625	JN315883.1	IncQ2	000201__KJ631731_00005	MOBF	NC_019262_00003	-	-	-	-	Mobilizable
1626	JN315884.1	rep_cluster_1068	000313__JN315884_00003	MOBP	NC_016611_00011	-	-	-	-	Mobilizable
1627	JN315885.1	rep_cluster_1068	000313__JN315884_00003	MOBP	NC_016611_00011	-	-	-	-	Mobilizable
1628	JN420336.1	rep_cluster_1150,IncH	000430__CP020850,000137__CP017986_00041	MOBH	NC_016980_00239	MPF_F	NC_016980_00099,NC_016980_00109,NC_018107_00101,NC_016980_00240,NC_023911_00309,NC_016980_00110,NC_018107_00235	-	-	Conjugative
1629	JN581942.1	-	-	MOBF	NC_010643_00013	MPF_T	NC_010643_00022,NC_009982_00017,NC_009982_00013,NC_009982_00012	MOBF	NC_013292	Conjugative
1630	JN596279.1	-	-	-	-	-	-	-	-	Non-mobilizable
1631	JN596280.1	-	-	-	-	-	-	-	-	Non-mobilizable
1632	JN626286.1	IncL/M	000148__NC_021488_00028	MOBP	NC_004464_00056	MPF_I	NC_004464_00066,NC_005246_00057,NC_019344_00078,NC_019154_00069,NC_004464_00068,NC_019063_00094,NC_004464_00073,NC_005246_00069,NC_004464_00105	-	-	Conjugative
1633	JN648090.1	IncP	000179__NC_001735_00020	MOBP	NC_001735_00050	MPF_T	NC_004956_00085,NC_007353_00043,NC_008459_00022,NC_001735_00049	MOBP	KU302802	Conjugative
1634	JN687470.1	rep_cluster_1254,IncA/C2	000562__KT346360_00001,000092__CP025470	MOBH	NC_012885_00072	MPF_F	NC_023291_00077,NC_009140_00071,NC_016974_00085,NC_012885_00083,NC_012885_00091,NC_014170_00023,NC_012885_00088,NC_012885_00167	-	-	Conjugative
1635	JN689217.1	rep_cluster_1519	000868__JN689217	-	-	-	-	-	-	Non-mobilizable
1636	JN689218.1	rep_cluster_806	002287__NZ_CM001480_00003	-	-	-	-	-	-	Non-mobilizable
1637	JN689220.1	rep_cluster_1519	000861__DQ366035	-	-	-	-	-	-	Non-mobilizable
1638	JN692546.1	ColRNAI_rep_cluster_1857	000008__AJ627566	MOBP	NC_019076_00002	-	-	MOBP	MF083142	Mobilizable
1639	JN704639.1	rep_cluster_1159	000438__X01654	MOBQ	NC_002056_00006	-	-	-	-	Mobilizable
1640	JN793951.1	-	-	-	-	-	-	-	-	Non-mobilizable
1641	JN796410.1	IncI1	000145__HE610900_00001	MOBP	NC_019097	MPF_I	NC_023290_00086,NC_019097_00085,NC_019097_00056,NC_022267_00069,NC_015965_00072,NC_019097_00075,NC_022267_00057,NZ_CM001473_00069,NC_019111_00038	MOBP	HM021326	Conjugative
1642	JN797501.1	IncI2	000147__CP006264_00003	MOBP	NC_022520_00030	MPF_T	NC_020270_00063,NC_019115_00018,NC_019039_00052,NC_019039_00051,NC_020270_00058	-	-	Conjugative
1643	JN835187.1	rep_cluster_594	002024__JN835187	-	-	-	-	-	-	Non-mobilizable
1644	JN861072.1	IncA/C2	000092__CP025470	MOBH	NC_012885_00072	MPF_F	NC_014170_00023,NC_023291_00077,NC_012885_00083,NC_016974_00085,NC_012885_00088,NC_012885_00091,NC_012885_00167,NC_009140_00071	-	-	Conjugative
1645	JN872565.1	rep_cluster_690	002159__JN872565	-	-	-	-	-	-	Non-mobilizable
1646	JN885080.1	IncFII,IncFIB	000114__CP015527,000101__NZ_CP012345_00042	-	-	MPF_F	NC_019094_00090,NC_022651_00077,NC_019002_00076,NC_019002_00072	-	-	Non-mobilizable
1647	JN885081.1	IncFII	000114__CP015527	MOBF	NC_007208_00043	MPF_F	NC_022651_00077,NC_017054_00100,NC_019112_00045,NC_019112_00042,NC_019112_00063,NC_019094_00090,NC_017054_00096,NC_017054_00098,NC_017054_00095,NC_019002_00072	-	-	Conjugative
1648	JN887338.1	IncX1	000215__KC853434_00019	MOBP	NC_019096_00001	MPF_T	NC_010860_00022,NC_017624_00009,NC_023277_00163,NC_013503_00034,NC_019067_00043	MOBP	GQ900390	Conjugative
1649	JN935897.1	IncX1	000215__KC853434_00019	MOBP	NC_019096_00001	MPF_T	NC_019046_00026,NC_017624_00009,NC_023277_00163,NC_019067_00043,NC_010860_00022	-	-	Conjugative
1650	JN935898.1	IncX1	000216__CP009767_00121	MOBP	NC_019096_00001	MPF_T	NC_013503_00034,NC_019067_00043,NC_010860_00022,NC_023277_00163,NC_017624_00009	MOBP	CP006839	Conjugative
1651	JN935899.1	IncX3	000220__JN935899_00001	MOBP	NC_020552_00059	MPF_T	NC_023277_00163,NC_017624_00009,NC_019083_00030,NC_019083_00032,NC_019157_00030	-	-	Conjugative
1652	JN979787.1	ColRNAI_rep_cluster_1987	000019__CP000651_00005	-	-	-	-	MOBP	CP018223	Mobilizable
1653	JN980137.1	rep_cluster_1827	001247__NC_010875_00002	MOBV	NC_010875_00006	-	-	-	-	Mobilizable
1654	JN980138.1	rep_cluster_1827	001247__NC_010875_00002	MOBV	NC_010875_00006	-	-	-	-	Mobilizable
1655	JN983042.1	rep_cluster_1088,IncH	000340__KU353730,000139__NC_012555_00001	MOBH	NC_012555_00231	MPF_F	NC_005211_00207,NC_005211_00005,NC_005211_00200,NC_021845_00017,NC_005211_00030,NC_005211_00012,NC_009838_00006	MOBH	NZ_CP011605	Conjugative
1656	JN983043.1	IncA/C2	000092__CP025470	MOBH	NC_012885_00072	MPF_F	NC_014170_00023,NC_012885_00088,NC_012885_00091,NC_023291_00077,NC_009140_00071,NC_016974_00085,NC_012885_00167,NC_012885_00083	MOBH	JQ319772	Conjugative
1657	JN983044.1	IncI2	000147__CP006264_00003	MOBP	NC_019115_00069	MPF_T	NC_019115_00018,NC_020270_00063,NC_019039_00052,NC_019039_00051,NC_020270_00058	-	-	Conjugative
1658	JN983045.1	IncA/C2	000092__CP025470	MOBH	NC_012885_00072	MPF_F	NC_012885_00167,NC_016974_00085,NC_009140_00071,NC_012885_00083,NC_014170_00023	-	-	Conjugative
1659	JN983046.1	IncFIA,IncFII,IncFIB	000094__NZ_CP015070_00117,000121__CP024805,000096__NC_019117_00097	MOBF	NC_017627_00068	MPF_F	NC_008460_00107,08-5333_00200,NC_022651_00077,NC_010488_00021,NC_017054_00096,NC_014615_00033,NC_010409_00124,NC_018966_00040,NC_019094_00090,NC_013437_00116,NC_007675_00027,NC_017639_00094	MOBF	LN824137	Conjugative
1660	JN983047.1	IncFIB,IncFIA,IncFII	000096__NC_019117_00097,000094__NZ_CP015070_00117,000121__CP024805	MOBF	NC_017627_00068	MPF_F	NC_022651_00077,NC_019094_00090,NC_018966_00040,NC_014615_00033,NC_007675_00027,08-5333_00200,NC_017054_00096,NC_008460_00107,NC_013437_00116,NC_010409_00124,NC_017639_00094,NC_010488_00021	MOBF	LN824137	Conjugative
1661	JN983048.1	IncA/C2	000092__CP025470	MOBH	NC_012885_00072	MPF_F	NC_014170_00023,NC_009140_00071,NC_016974_00085,NC_012885_00083,NC_012885_00167	-	-	Conjugative
1662	JN983049.1	IncI1	000145__HE610900_00001	MOBP	NC_019097	MPF_I	NC_019111_00038,NC_022267_00057,NC_022267_00069,NC_015965_00072,NZ_CM001473_00069,NC_019097_00056,NC_023290_00086,NC_019097_00075,NC_019097_00085	MOBP	DQ916413	Conjugative
1663	JQ004006.1	rep_cluster_133	000648__JQ004006	-	-	-	-	-	-	Non-mobilizable
1664	JQ004406.1	IncP	000175__JQ004408_00022	MOBP	NC_019318_00039	MPF_T	NC_019318_00040,NC_019318_00057,NC_019318_00059,NC_019318_00058	MOBP	NC_017965	Conjugative
1665	JQ004407.1	IncP	000175__JQ004408_00022	MOBP	NC_019318_00039	MPF_T	NC_019318_00057,NC_019318_00040,NC_019318_00059,NC_019318_00058	MOBP	NC_017965	Conjugative
1666	JQ004408.1	IncP	000175__JQ004408_00022	MOBP	NC_019318_00039	MPF_T	NC_019318_00058,NC_019318_00059,NC_019318_00040,NC_019318_00057	MOBP	NC_017965	Conjugative
1667	JQ004409.1	IncP	000175__JQ004408_00022	MOBP	NC_019318_00039	MPF_T	NC_019318_00058,NC_019318_00059,NC_019318_00057,NC_019318_00040	MOBP	NC_017965	Conjugative
1668	JQ010984.1	IncA/C2	000092__CP025470	MOBH	NC_012885_00072	MPF_F	NC_009140_00071,NC_023291_00077,NC_016974_00085,NC_012885_00167,NC_012885_00088,NC_016976_00061,NC_014170_00023,NC_012885_00083,NC_012885_00091	-	-	Conjugative
1669	JQ031550.1	rep_cluster_409	001731__NC_016850_00012	-	-	-	-	-	-	Non-mobilizable
1670	JQ031551.1	rep_cluster_1462	000801__NC_006842_00018	-	-	MPF_T	NC_006842_00055,NC_016853_00056,NC_006842_00040,NC_006842_00024	-	-	Non-mobilizable
1671	JQ031552.1	-	-	MOBH	NC_016851_00056	MPF_G	NC_016851_00032,NC_016851_00033,NC_016851_00034,NC_016851_00019,NC_016851_00001,NC_016851_00028,NC_016851_00031	-	-	Conjugative
1672	JQ041633.1	rep_cluster_1963	001405__JQ041633_00001	MOBV	NC_019287_00002	-	-	-	-	Mobilizable
1673	JQ060896.1	-	-	MOBQ	NC_020818_00001	MPF_T	NC_019268_00038,NC_019268_00037,NC_019268_00026,NC_019268_00030,NC_019268_00036	MOBQ	NC_019342	Conjugative
1674	JQ065021.1	-	-	-	-	-	-	-	-	Non-mobilizable
1675	JQ065022.1	rep_cluster_1214	000505__JQ065022_00001	-	-	-	-	-	-	Non-mobilizable
1676	JQ066766.1	-	-	-	-	-	-	-	-	Non-mobilizable
1677	JQ066767.1	-	-	MOBQ	NC_019289_00004	-	-	-	-	Mobilizable
1678	JQ245699.1	rep_cluster_1194	000482__JQ245699_00001	MOBQ	NC_019275_00004	-	-	-	-	Mobilizable
1679	JQ245700.1	rep_cluster_1191	000479__JQ245700_00001	MOBP	NC_019276_00004	-	-	-	-	Mobilizable
1680	JQ245701.1	rep_cluster_648	002104__JQ245701_00001	MOBP	NC_019294_00006	-	-	-	-	Mobilizable
1681	JQ245702.1	rep_cluster_1221	000518__NC_019293_00001	MOBP	NC_019293_00005	-	-	-	-	Mobilizable
1682	JQ245703.1	rep_cluster_1403	000746__JQ245703_00001	MOBP	NC_019277_00005	-	-	-	-	Mobilizable
1683	JQ245704.1	rep_cluster_1059	000302__JQ245704_00001	-	-	-	-	-	-	Non-mobilizable
1684	JQ269335.1	IncX2	000219__NC_005923_00001	MOBP	NC_019047_00022	MPF_T	NC_019047_00032,NC_019047_00031,NC_019047_00030,NC_019047_00035	MOBP	CP022251	Conjugative
1685	JQ269336.1	IncX1	000215__KC853434_00019	MOBP	NC_019096_00001	MPF_T	NC_013503_00034,NC_023277_00163,NC_010860_00022,NC_019067_00043,NC_017624_00009	MOBP	CP007455	Conjugative
1686	JQ292796.1	IncN	000156__NC_014304_00092	MOBP	NC_018999_00016	MPF_G	NC_014304_00062,NC_014304_00056,NC_014304_00041,NC_018999_00045,NC_014304_00045,NC_014304_00040,NC_014304_00046	-	-	Conjugative
1687	JQ312422.1	rep_cluster_1256	000566__JQ312422_00004	MOBP	NC_019969_00003	-	-	-	-	Mobilizable
1688	JQ312423.1	rep_cluster_1256	000568__NC_013380_00007	MOBP	NC_005003_00003	-	-	-	-	Mobilizable
1689	JQ312424.1	rep_cluster_1256	000568__NC_013380_00007	MOBP	NC_005003_00003	-	-	-	-	Mobilizable
1690	JQ319766.1	ColRNAI_rep_cluster_1857	000012__CP000801	-	-	-	-	-	-	Non-mobilizable
1691	JQ319767.1	-	-	-	-	-	-	-	-	Non-mobilizable
1692	JQ319768.1	ColRNAI_rep_cluster_1987	000019__CP000651_00005	-	-	-	-	MOBP	NZ_CP011140	Mobilizable
1693	JQ319769.1	-	-	MOBF,MOBP	NC_019255_00001,NC_019214_00002	-	-	-	-	Mobilizable
1694	JQ319770.1	ColRNAI_rep_cluster_1987	000019__CP000651_00005	MOBP,MOBP	NC_001848_00006,NC_019986_00002	-	-	MOBP	CP008720	Mobilizable
1695	JQ319771.1	-	-	-	-	-	-	-	-	Non-mobilizable
1696	JQ319772.1	ColRNAI_rep_cluster_1857	000008__AJ627566	MOBF	CP019897	-	-	MOB_unknown	CP010224	Mobilizable
1697	JQ319773.1	-	-	MOBP,MOBF	NC_019214_00002,NC_019255_00001	-	-	-	-	Mobilizable
1698	JQ319774.1	-	-	MOBP,MOBF	NC_010042_00002,NC_019255_00001	-	-	-	-	Mobilizable
1699	JQ319775.1	ColRNAI_rep_cluster_1987	000019__CP000651_00005	MOBP,MOBP	NC_019986_00002,NC_001848_00006	-	-	-	-	Mobilizable
1700	JQ340175.1	rep_cluster_295	001603__JQ340175	-	-	-	-	-	-	Non-mobilizable
1701	JQ348844.1	rep_cluster_1403	000742__JQ348844_00001	MOBP	NC_019305_00006	-	-	-	-	Mobilizable
1702	JQ348845.1	rep_cluster_911	002396__JQ348845_00002	MOBP	NC_019306_00008	-	-	-	-	Mobilizable
1703	JQ349086.2	IncN	000151__NC_019163_00001	MOBF	NC_015872_00034	MPF_T	NC_015872_00033,NC_015872_00005,NC_015872_00011,NC_015872_00007,NC_015872_00010,NC_015872_00006	-	-	Conjugative
1704	JQ394981.1	rep_cluster_933	002419__JQ394981	MOBV	NC_005076_00012	-	-	MOBV	NZ_CP009579	Mobilizable
1705	JQ418520.1	rep_cluster_1542	000907__JQ418520_00008	MOBP	NC_019326_00023	MPF_T	NC_015147_00039	-	-	Conjugative
1706	JQ418521.1	IncFII	000123__CP000858	-	-	MPF_T	NC_019343_00015,NC_019343_00022,NC_019343_00011,NC_019343_00017,NC_019343_00016	-	-	Non-mobilizable
1707	JQ418522.1	IncFIIA,IncFII	000136__AP014877_00014,000121__CP024805	MOBP,MOBF	NC_011416_00039,NC_017627_00068	MPF_F	NC_017639_00094,NC_008460_00107,NC_019094_00068,NC_017054_00096,NC_019094_00090,NC_019037_00027,NC_013437_00116,NC_022651_00077,NC_007675_00027,NC_010409_00124,08-5333_00200,NC_010719_00097	MOBF	NC_019283	Conjugative
1708	JQ418523.1	rep_cluster_1346	000664__NC_019337_00027	MOBF	NC_019337_00007	MPF_T	NC_019337_00012,NC_019337_00016,NC_019337_00017,NC_019337_00019,NC_019337_00022,NC_019337_00021	-	-	Conjugative
1709	JQ418526.1	rep_cluster_997	002482__JQ418526_00004	-	-	-	-	-	-	Non-mobilizable
1710	JQ418527.1	rep_cluster_1674	001075__JQ418527_00044	MOBP	NC_015147_00088	MPF_T	NC_015147_00039	-	-	Conjugative
1711	JQ418528.1	-	-	MOBP	NC_019330_00058	-	-	-	-	Mobilizable
1712	JQ418529.1	rep_cluster_1732	001149__JQ418529	MOBP	NC_015147_00088	MPF_T	NC_015147_00039	-	-	Conjugative
1713	JQ418530.1	-	-	MOBP	NC_015147_00088	MPF_T	NC_015147_00039	-	-	Conjugative
1714	JQ418531.1	-	-	MOBP	NC_015147_00088	MPF_T	NC_015147_00039	-	-	Conjugative
1715	JQ418536.1	rep_cluster_356	001671__JQ418536_00005	-	-	-	-	-	-	Non-mobilizable
1716	JQ418537.1	rep_cluster_505	001878__JQ418537_00057	-	-	MPF_I	NC_019335_00092,NC_019335_00065,NC_019336_00081,NC_019335_00069,NC_019336_00046,NC_019336_00047,NC_019336_00072	-	-	Non-mobilizable
1717	JQ418538.1	IncFII	000113__CP022035	MOBF	NC_019125_00139	MPF_F	NC_019342_00058,NC_019342_00051,NC_019342_00064,NZ_AGTD01000004_00091,NC_021871_00015,NC_019125_00135,NC_021871_00022,NC_021817_00013,NZ_AGTD01000004_00099,NC_021817_00023,NZ_AGTD01000004_00094	MOBF	LN873256	Conjugative
1718	JQ418539.1	rep_cluster_505	001876__NC_019336_00042	-	-	MPF_I	NC_019336_00047,NC_019335_00069,NC_019335_00092,NC_019336_00081,NC_019336_00072,NC_019335_00065,NC_019336_00046	-	-	Non-mobilizable
1719	JQ418541.1	IncFII,IncFII	000122__JQ418538,000114__CP015527	MOBF	NC_019125_00139	MPF_F	NC_021817_00023,NC_021817_00013,NC_019125_00135,NC_021871_00022,NZ_AGTD01000004_00094,NZ_AGTD01000004_00091,NC_021871_00015,NC_021817_00021,NC_019342_00058,NC_019342_00064	MOBF	LN873255	Conjugative
1720	JQ418542.1	IncL/M	000148__NC_021488_00028	MOBP	NC_004464_00056	MPF_I	NC_019063_00094,NC_005246_00069,NC_004464_00105,NC_019344_00078,NC_019154_00069,NC_004464_00068,NC_004464_00066,NC_004464_00073,NC_005246_00057	-	-	Conjugative
1721	JQ432559.1	IncFIIA,IncFII	000136__AP014877_00014,000121__CP024805	MOBF	NC_017627_00068	MPF_F	NC_008460_00107,NC_017639_00094,NC_017054_00096,NC_019094_00068,NC_022651_00077,NC_010719_00097,08-5333_00200,NC_007675_00027,NC_019094_00090,NC_018966_00040,NC_013437_00116,NC_010409_00124	MOBP	AP014804	Conjugative
1722	JQ432563.1	rep_cluster_717	002190__JQ432563_00001	-	-	-	-	-	-	Non-mobilizable
1723	JQ432564.1	rep_cluster_777	002254__JQ432564_00001	-	-	-	-	MOB_unknown	NC_010419	Mobilizable
1724	JQ436721.1	IncP	000179__NC_001735_00020	MOBP	NC_001735_00050	MPF_T	NC_008459_00022,NC_019318_00059,NC_004956_00085,NC_001735_00049	MOBP	NZ_CP009107	Conjugative
1725	JQ436722.1	IncP	000174__JN106175_00001	MOBP	NC_019318_00039	MPF_T	NC_019318_00059,NC_019318_00040,NC_019318_00057,NC_019318_00058	MOBP	NC_005003	Conjugative
1726	JQ480155.1	IncQ1,ColRNAI_rep_cluster_1291	000195__NC_013728_00014,000001__EU090225_00001	MOBQ	NC_019783_00003	-	-	-	-	Mobilizable
1727	JQ606827.1	rep_cluster_1572	000945__NC_017833_00031	-	-	-	-	-	-	Non-mobilizable
1728	JQ609357.1	IncN	000155__CP018649	MOBF	NC_015599_00019	MPF_T	NC_011617_00041,NC_009131_00030,NC_008612_00190,NC_014368_00014,NC_022375_00024,NC_007682_00044	MOBF	NZ_CP013027	Conjugative
1729	JQ611726.1	rep_cluster_1046	000290__NC_019186_00001	MOBV	NC_019185_00004	-	-	-	-	Mobilizable
1730	JQ611727.1	rep_cluster_1046	000290__NC_019186_00001	-	-	-	-	-	-	Non-mobilizable
1731	JQ619831.1	rep_cluster_155	000915__CP001784_00003	-	-	-	-	-	-	Non-mobilizable
1732	JQ621947.1	rep_cluster_727	002199__JQ621947	-	-	-	-	-	-	Non-mobilizable
1733	JQ655731.1	rep_cluster_1519	000861__DQ366035	-	-	-	-	-	-	Non-mobilizable
1734	JQ663598.1	rep_cluster_889	002366__KY595966_00031	-	-	-	-	-	-	Non-mobilizable
1735	JQ664550.1	rep_cluster_1914	001354__JQ664550_00001	MOBV	NC_019319_00011	-	-	-	-	Mobilizable
1736	JQ665880.1	rep_cluster_492,rep_cluster_468,rep_cluster_946	001860__NC_019313_00001,001817__NC_019313_00140,002430__NC_015592_00083	MOBF	NC_019846_00073	MPF_T	NC_017327_00230,NC_019313_00276,NC_017327_00231,NC_016814_00035	-	-	Conjugative
1737	JQ670905.1	rep_cluster_1046	000290__NC_019186_00001	-	-	-	-	-	-	Non-mobilizable
1738	JQ678602.1	-	-	MOBQ	NC_019356_00006	-	-	-	-	Mobilizable
1739	JQ684023.1	rep_cluster_1723	001139__KC542384_00001	-	-	-	-	-	-	Non-mobilizable
1740	JQ684025.1	rep_cluster_1744	001164__KM659094	MOBP	NC_019316_00005	-	-	-	-	Mobilizable
1741	JQ696952.1	rep_cluster_814	002298__JQ696952	-	-	-	-	-	-	Non-mobilizable
1742	JQ728013.1	rep_cluster_1324	000643__NC_019340_00005	-	-	-	-	-	-	Non-mobilizable
1743	JQ728484.1	rep_cluster_1370	000700__NC_020451_00027	MOBP	NC_020451_00033	-	-	-	-	Mobilizable
1744	JQ737005.1	rep_cluster_2014	001450__CP015640	-	-	MPF_T	NC_022437_00042,NC_022437_00022,NC_022437_00035,NC_022437_00019,NC_022437_00034	-	-	Non-mobilizable
1745	JQ739157.2	-	-	-	-	-	-	-	-	Non-mobilizable
1746	JQ739158.1	-	-	-	-	-	-	-	-	Non-mobilizable
1747	JQ773456.1	-	-	MOBP,MOBF	NC_010042_00002,NC_019255_00001	-	-	-	-	Mobilizable
1748	JQ773457.1	-	-	MOBP,MOBF	NC_010042_00002,NC_019255_00001	-	-	-	-	Mobilizable
1749	JQ776504.1	ColRNAI_rep_cluster_1956	000015__JX514065	MOBQ	NC_021523_00003	-	-	-	-	Mobilizable
1750	JQ776505.1	ColRNAI_rep_cluster_1956	000015__JX514065	MOBQ	NC_021523_00003	-	-	-	-	Mobilizable
1751	JQ776506.1	ColRNAI_rep_cluster_1956	000015__JX514065	-	-	-	-	-	-	Non-mobilizable
1752	JQ776507.1	ColRNAI_rep_cluster_1956	000015__JX514065	-	-	-	-	-	-	Non-mobilizable
1753	JQ776510.1	ColRNAI_rep_cluster_1956	000015__JX514065	-	-	-	-	-	-	Non-mobilizable
1754	JQ782192.1	rep_cluster_949	002432__JQ782192	-	-	-	-	-	-	Non-mobilizable
1755	JQ783055.1	rep_cluster_1046	000290__NC_019186_00001	MOBV	NC_019185_00004	-	-	-	-	Mobilizable
1756	JQ783056.1	rep_cluster_1046	000290__NC_019186_00001	MOBV	NC_019185_00004	-	-	-	-	Mobilizable
1757	JQ796370.1	rep_cluster_1943	001383__NC_019366_00001	-	-	-	-	-	-	Non-mobilizable
1758	JQ796371.1	rep_cluster_1725	001141__NC_019367_00001	-	-	-	-	-	-	Non-mobilizable
1759	JQ807734.1	-	-	-	-	-	-	-	-	Non-mobilizable
1760	JQ821353.1	rep_cluster_520	001895__AF116286_00005	MOB_Unknown	JQ821353	-	-	-	-	Mobilizable
1761	JQ821354.1	rep_cluster_1377	000714__NC_019348_00004	MOBP	NC_019348_00003	-	-	-	-	Mobilizable
1762	JQ821355.1	rep_cluster_342	001657__JQ821355_00001	-	-	-	-	-	-	Non-mobilizable
1763	JQ821356.1	rep_cluster_556	001950__JQ821356	MOBP	NC_019350_00002	-	-	-	-	Mobilizable
1764	JQ821357.1	rep_cluster_554	001928__JQ821357	MOBQ	NC_019351_00007	MPF_T	NC_019351_00020,NC_019351_00013	-	-	Conjugative
1765	JQ824049.1	IncR,IncA/C2	000204__CP008701_00115,000092__CP025470	MOBH,MOBP	NC_012885_00072,NC_021576_00050	MPF_F	NC_012885_00088,NC_016974_00085,NC_012885_00167,NC_012885_00091,NC_012885_00083,NC_023291_00077,NC_014170_00023,NC_009140_00071	MOBH	JQ319772	Conjugative
1766	JQ837276.1	ColRNAI_rep_cluster_1987,rep_cluster_2050,IncL/M	000019__CP000651_00005,001473__CP024541,000148__NC_021488_00028	MOBP	NC_004464_00056	MPF_I	NC_004464_00073,NC_004464_00068,NC_004464_00066,NC_019154_00069,NC_019063_00094,NC_004464_00105,NC_005246_00069,NC_005246_00057,NC_019344_00078	-	-	Conjugative
1767	JQ861958.1	rep_cluster_1017	000265__NC_019146_00001	-	-	-	-	-	-	Non-mobilizable
1768	JQ861960.1	rep_cluster_1256	000566__JQ312422_00004	MOBP	NC_019147_00006	-	-	-	-	Mobilizable
1769	JQ996148.1	rep_cluster_1478	000817__NC_020131_00009	MOBQ	NC_020131_00006	-	-	-	-	Mobilizable
1770	JQ996149.1	IncN	000150__JQ996149	MOBF	NC_020122_00018	MPF_T	NC_020122_00006,NC_020122_00011,NC_020122_00012,NC_020122_00019,NC_020122_00009	-	-	Conjugative
1771	JQ996150.1	IncT	000208__NC_020123_00061	MOBP	NC_020123_00104	-	-	-	-	Mobilizable
1772	JX017306.1	ColRNAI_rep_cluster_1987	000019__CP000651_00005	MOBP,MOBP	NC_001848_00006,NC_011404_00002	-	-	MOBP	CP008720	Mobilizable
1773	JX017307.1	ColRNAI_rep_cluster_1987	000019__CP000651_00005	MOBP,MOBP	NC_001848_00006,NC_011404_00002	-	-	MOBP	CP008720	Mobilizable
1774	JX017308.1	ColRNAI_rep_cluster_1987	000019__CP000651_00005	MOBP,MOBP	NC_001848_00006,NC_011404_00002	-	-	MOBP	CP008720	Mobilizable
1775	JX017309.1	ColRNAI_rep_cluster_1987	000019__CP000651_00005	MOBP,MOBP	NC_011404_00002,NC_001848_00006	-	-	MOBP	CP008720	Mobilizable
1776	JX065630.1	IncN	000155__CP018649	MOBF	NC_015599_00019	MPF_T	NC_008612_00190,NC_011617_00041,NC_014368_00014,NC_009131_00030,NC_022375_00024,NC_007682_00044	MOBF	NZ_CP013027	Conjugative
1777	JX065631.1	IncN	000155__CP018649	MOBF	NC_015599_00019	MPF_T	NC_011617_00041,NC_009131_00030,NC_007682_00044,NC_008612_00190,NC_022375_00024,NC_014368_00014	MOBF	NZ_CP013027	Conjugative
1778	JX069966.1	rep_cluster_1172	000454__KY202458_00008	-	-	-	-	-	-	Non-mobilizable
1779	JX072963.1	-	-	MOBQ	NC_020818_00001	MPF_T	NC_019268_00038,NC_019268_00026,NC_019268_00037,NC_019268_00036,NC_019268_00030	MOBQ	NC_019342	Conjugative
1780	JX076770.1	-	-	MOBP,MOBP	NZ_AFDA02000006_00006,NZ_ALIG01000010_00048	-	-	MOBP	NC_013366	Mobilizable
1781	JX101638.1	-	-	-	-	-	-	-	-	Non-mobilizable
1782	JX101639.1	-	-	-	-	-	-	-	-	Non-mobilizable
1783	JX101640.1	rep_cluster_290	001597__JX101640	-	-	-	-	-	-	Non-mobilizable
1784	JX101641.1	rep_cluster_1260	000572__JX101641_00001	-	-	-	-	-	-	Non-mobilizable
1785	JX101642.1	rep_cluster_482	001840__JX101642	-	-	-	-	-	-	Non-mobilizable
1786	JX101643.1	rep_cluster_1265	000579__CP010353_00004	-	-	-	-	-	-	Non-mobilizable
1787	JX101644.1	rep_cluster_1254	000563__CP015621_00010	-	-	-	-	-	-	Non-mobilizable
1788	JX101645.1	rep_cluster_1740	001159__JX101645_00001	-	-	-	-	-	-	Non-mobilizable
1789	JX101646.1	rep_cluster_1226	000523__LT594096_00001	MOBQ	NC_006877_00013	-	-	-	-	Mobilizable
1790	JX101647.1	rep_cluster_639	002092__CU459140_00002	-	-	-	-	-	-	Non-mobilizable
1791	JX101693.1	IncL/M	000148__NC_021488_00028	MOBP	NC_004464_00056	MPF_I	NC_005246_00069,NC_019063_00094,NC_019154_00069,NC_005246_00057,NC_004464_00073,NC_004464_00068,NC_004464_00066,NC_004464_00105,NC_019344_00078	-	-	Conjugative
1792	JX104759.1	IncX3	000221__NC_025130_00012	MOBP	NC_020552_00059	MPF_T	NC_019157_00029,NC_023277_00163,NC_019157_00030,NC_017624_00009,NC_019083_00030	-	-	Conjugative
1793	JX127248.1	IncQ1,IncFII,IncFIA,IncFIB,IncFIIA	000195__NC_013728_00014,000121__CP024805,000094__NZ_CP015070_00117,000095__NZ_CP014273_00094,000136__AP014877_00014	MOBF	NC_017627_00068	MPF_F	NC_008460_00097,NC_019094_00090,NC_010719_00097,NC_017639_00094,NC_007675_00027,08-5333_00200,NC_022651_00077,NC_017054_00096,NC_008460_00107,NC_010409_00124,NC_019094_00068,NC_013437_00116	MOBF	NZ_CM001473	Conjugative
1794	JX133088.1	ColRNAI_rep_cluster_1993	000024__JX133088	-	-	-	-	MOBP	NC_018997	Mobilizable
1795	JX134061.1	Inc13	000074__NC_001764_00001	MOBV	NC_001764_00001	-	-	-	-	Mobilizable
1796	JX139735.1	IncX1	000215__KC853434_00019	MOBP	NC_019096_00001	MPF_T	NC_019067_00043,NC_010860_00022,NC_023277_00163,NC_019138_00026,NC_017624_00009	-	-	Conjugative
1797	JX141473.1	IncA/C2	000092__CP025470	MOBH	NC_012885_00072	MPF_F	NC_012885_00088,NC_012885_00091,NC_009140_00071,NC_016974_00085,NC_012885_00083,NC_023291_00077,NC_014170_00023,NC_012885_00167	MOBH	AB040037	Conjugative
1798	JX174167.1	Inc13	000060__JX174167_00003	MOBV	NC_014919_00004	-	-	-	-	Mobilizable
1799	JX174168.1	rep_cluster_1880	001316__JX174168	-	-	-	-	-	-	Non-mobilizable
1800	JX174169.1	-	-	-	-	-	-	-	-	Non-mobilizable
1801	JX182975.1	rep_cluster_1254	000562__KT346360_00001	MOBH	NC_019360_00106	MPF_F	NC_009981_00239,NC_019360_00278,NC_005211_00030,NC_002305_00127,NC_019360_00255,NC_002305_00120,NC_019360_00256	-	-	Conjugative
1802	JX193301.1	IncN	000155__CP018649	MOBF	NC_015599_00019	MPF_T	NC_008612_00190,NC_011617_00041,NC_014368_00014,NC_022375_00024,NC_007682_00044,NC_009131_00030	MOBF	NZ_CP016498	Conjugative
1803	JX193302.1	IncX5	000225__CP011639_00001	MOBP	NC_019096_00001	MPF_T	NC_019899_00039,NC_019899_00038,NC_019899_00035,NC_023277_00163,NC_019899_00040	-	-	Conjugative
1804	JX194159.1	rep_cluster_431	001772__JX194159_00010	-	-	-	-	-	-	Non-mobilizable
1805	JX194160.1	rep_cluster_1382	000721__JX194160_00039	-	-	-	-	-	-	Non-mobilizable
1806	JX194161.1	rep_cluster_1694	001095__JX194161_00006	-	-	-	-	-	-	Non-mobilizable
1807	JX202560.1	-	-	-	-	-	-	-	-	Non-mobilizable
1808	JX202561.1	-	-	-	-	-	-	-	-	Non-mobilizable
1809	JX202562.1	rep_cluster_1161	000443__JX202562	-	-	-	-	-	-	Non-mobilizable
1810	JX202563.1	-	-	-	-	-	-	-	-	Non-mobilizable
1811	JX202564.1	-	-	-	-	-	-	-	-	Non-mobilizable
1812	JX254913.2	IncX3	000221__NC_025130_00012	MOBP	NC_020552_00059	MPF_T	NC_019157_00030,NC_019157_00029,NC_017624_00009,NC_023277_00163,NC_019083_00030	-	-	Conjugative
1813	JX258654.1	IncX4	000222__CP010880_00038	MOBP	NC_013718_00057	MPF_T	NC_013718_00045,NC_013718_00041,NC_019128_00037,NC_013718_00044	-	-	Conjugative
1814	JX258655.1	IncX4	000224__NC_022105_00002	MOBP	NC_013718_00057	MPF_T	NC_013718_00041,NC_013718_00045,NC_013718_00044,NC_019128_00037	-	-	Conjugative
1815	JX258656.1	IncX4	000222__CP010880_00038	MOBP	NC_013718_00057	MPF_T	NC_013718_00044,NC_013718_00041,NC_013718_00045,NC_019128_00037	-	-	Conjugative
1816	JX275965.1	rep_cluster_1404	000747__JX275965_00004	-	-	-	-	-	-	Non-mobilizable
1817	JX294729.1	rep_cluster_1812	001232__NC_019796_00002	-	-	-	-	-	-	Non-mobilizable
1818	JX294730.1	rep_cluster_1812	001231__NC_019784_00002	-	-	-	-	-	-	Non-mobilizable
1819	JX294731.1	rep_cluster_1860	001292__NC_019785_00002	-	-	-	-	-	-	Non-mobilizable
1820	JX294732.1	rep_cluster_1846	001270__JX294732_00002	-	-	-	-	-	-	Non-mobilizable
1821	JX294733.1	rep_cluster_1860	001295__NC_019795_00002	-	-	-	-	-	-	Non-mobilizable
1822	JX294734.1	rep_cluster_1873	001309__NC_019786_00002	-	-	-	-	-	-	Non-mobilizable
1823	JX294735.1	rep_cluster_1860	001294__NC_019794_00002	-	-	-	-	-	-	Non-mobilizable
1824	JX294736.1	rep_cluster_1860	001293__NC_019787_00002	-	-	-	-	-	-	Non-mobilizable
1825	JX294737.1	rep_cluster_1812	001232__NC_019796_00002	-	-	-	-	-	-	Non-mobilizable
1826	JX312671.1	rep_cluster_1319,rep_cluster_754	000637__CP004038_00178,002232__NC_019376_00020	-	-	-	-	MOBQ	NC_013388	Mobilizable
1827	JX397875.1	rep_cluster_1798	001219__JX397875_00045	-	-	MPF_T	NC_014368_00014,NC_011617_00041,NC_007682_00044,NC_008612_00190,NC_007682_00039	-	-	Non-mobilizable
1828	JX406743.2	-	-	MOBP	NC_022368_00001	MPF_I	NC_022368_00002	-	-	Conjugative
1829	JX416328.1	rep_cluster_731	002205__JX416328_00018	MOBQ	NC_017480_00003	-	-	-	-	Mobilizable
1830	JX424423.1	IncFII,rep_cluster_1418	000124__KP125893_00142,000759__NC_013950_00034	MOBF	NC_021231_00058	MPF_F	NC_021654_00016,NC_021502_00150,NC_019155_00032,NC_014312_00118,NC_014312_00128,NC_019165_00034,NC_023332_00154,NC_014312_00116,NC_019389_00068,NC_021502_00131,NC_022609_00081,NC_019389_00080	-	-	Conjugative
1831	JX424424.1	IncFII,IncFIB,IncFII	000132__HG969996,000107__CP014778_00094,000113__CP022035	-	-	MPF_F	NC_023332_00154,NC_019155_00032,NC_021502_00150,NC_019389_00080,NC_021502_00131,NC_022609_00081,NC_019165_00034,NC_014312_00128,NC_014312_00116,NC_021654_00016,NC_021231_00085,NC_014312_00118	-	-	Non-mobilizable
1832	JX424614.1	IncR	000204__CP008701_00115	MOBP	NC_021576_00050	-	-	-	-	Mobilizable
1833	JX430448.1	IncFIB,IncFII,IncFII	000107__CP014778_00094,000113__CP022035,000132__HG969996	MOBF	NC_021231_00058	MPF_F	NC_019155_00032,NC_014312_00128,NC_022609_00081,NC_021654_00016,NC_014312_00116,NC_023332_00154,NC_021502_00150,NC_021654_00004,NC_014312_00118,NC_019389_00080,NC_021502_00131,NC_019165_00034	-	-	Conjugative
1834	JX436327.1	rep_cluster_1012	000246__KX753679_00001	-	-	MPF_T	NC_002579_00026,NC_021724_00034,NC_002579_00027	-	-	Non-mobilizable
1835	JX442973.1	ColRNAI_rep_cluster_1857	000003__NC_002119_00001	MOBC	NC_009793_00003	-	-	-	-	Mobilizable
1836	JX442974.1	IncFII,IncFII,IncFIB	000132__HG969996,000113__CP022035,000107__CP014778_00094	MOBF	NC_021231_00058	MPF_F	NC_019155_00032,NC_022609_00081,NC_014312_00118,NC_021654_00004,NC_019389_00080,NC_021654_00016,NC_021502_00150,NC_021502_00131,NC_023332_00154,NC_014312_00128,NC_019165_00034	-	-	Conjugative
1837	JX442975.1	IncFIB	000097__NC_025166_00051	-	-	MPF_F	NC_023332_00154,NC_019389_00068,NC_014312_00116,NC_014312_00118	-	-	Non-mobilizable
1838	JX442976.1	IncA/C2	000092__CP025470	MOBH	NC_012885_00072	MPF_F	NC_023291_00077,NC_009140_00071,NC_012885_00088,NC_014170_00023,NC_016974_00085,NC_012885_00091,NC_012885_00167,NC_012885_00083	MOBH	JQ319772	Conjugative
1839	JX442977.1	IncFIB,ColRNAI_rep_cluster_1857	000097__NC_025166_00051,000003__NC_002119_00001	MOBC	NC_009793_00003	-	-	-	-	Mobilizable
1840	JX445149.1	IncI1	000145__HE610900_00001	MOBP	NC_019097	MPF_I	NC_022267_00057,NC_015965_00072,NC_019111_00038,NC_019097_00075,NC_023290_00086,NZ_CM001473_00069,NC_022267_00069,NC_019097_00085,NC_019097_00056	MOBP	HM021326	Conjugative
1841	JX457478.1	-	-	MOBP	NC_013090_00004	-	-	MOBP	NC_019134	Mobilizable
1842	JX469383.1	IncN	000155__CP018649	MOBF	NC_015599_00019	MPF_T	NC_007682_00044,NC_022375_00024,NC_011617_00041,NC_014368_00014,NC_008612_00190,NC_009131_00030	MOBF	NZ_CP016498	Conjugative
1843	JX469826.1	IncP	000180__NC_006830_00001	MOBP	NC_007353_00011	MPF_T	NC_006830_00009,NC_019318_00040,NC_006830_00008,NC_007353_00043	MOBP	NC_014368	Conjugative
1844	JX469827.1	IncP	000174__JN106175_00001	MOBP	NC_019318_00039	MPF_T	NC_019318_00058,NC_019318_00059,NC_019318_00057,NC_019318_00040	MOBP	NC_005003	Conjugative
1845	JX469828.1	IncP	000180__NC_006830_00001	MOBP	NC_007353_00011	MPF_T	NC_006830_00009,NC_007353_00043,NC_006830_00008,NC_019318_00040	MOBP	NC_017965	Conjugative
1846	JX469829.1	IncP	000178__JX469829_00001	MOBP	NC_007353_00011	MPF_T	NC_007353_00043,NC_019318_00040,NC_006830_00008,NC_006830_00009	MOBP	NC_017965	Conjugative
1847	JX469830.1	IncP	000182__CP002151_00001	MOBP	NC_008357_00089	MPF_T	NC_019318_00059,NC_008357_00088,NC_008357_00035	MOB_unknown	NZ_HG941719	Conjugative
1848	JX469831.1	IncP	000179__NC_001735_00020	MOBP	NC_001735_00050	MPF_T	NC_019318_00059,NC_001735_00049,NC_008459_00022,NC_004956_00085	MOBP	KU302802	Conjugative
1849	JX469832.1	IncP	000181__NC_007353_00037	MOBP	NC_007353_00011	MPF_T	NC_006830_00009,NC_007353_00043,NC_006830_00008,NC_019318_00040	MOBP	NC_017965	Conjugative
1850	JX469833.1	IncP	000182__CP002151_00001	MOBP	NC_008357_00089	MPF_T	NC_019318_00059,NC_008357_00035,NC_008357_00088	MOB_unknown	NZ_HG941719	Conjugative
1851	JX469834.1	IncP	000179__NC_001735_00020	MOBP	NC_001735_00050	MPF_T	NC_004956_00085,NC_008459_00022,NC_001735_00049,NC_019318_00059	MOBP	NZ_CP016548	Conjugative
1852	JX486125.1	IncP	000177__AB237782_00014	MOBP	NC_001735_00050	MPF_T	NC_019318_00059,NC_008459_00022,NC_004956_00085,NC_001735_00049	MOBP	KU302802	Conjugative
1853	JX486126.1	IncFII,IncFIIA	000121__CP024805,000136__AP014877_00014	MOBF	NC_017627_00068	MPF_F	NC_010409_00124,NC_007675_00027,NC_013437_00116,NC_022651_00077,NC_017054_00096,NC_019094_00090,NC_008460_00107,NC_010719_00097,NC_019037_00027,NC_017639_00094,NC_010488_00021,08-5333_00200	MOBF	KT754162	Conjugative
1854	JX494965.1	ColRNAI_rep_cluster_1987	000019__CP000651_00005	MOBP	NC_013090_00004	-	-	MOBP	NC_019134	Mobilizable
1855	JX514065.1	ColRNAI_rep_cluster_1956	000015__JX514065	-	-	-	-	-	-	Non-mobilizable
1856	JX514066.1	ColRNAI_rep_cluster_1956	000015__JX514065	-	-	-	-	-	-	Non-mobilizable
1857	JX515587.1	IncN	000155__CP018649	MOBF	NC_015599_00019	MPF_T	NC_008612_00190,NC_007682_00044,NC_009131_00030,NC_011617_00041,NC_014368_00014,NC_022375_00024	MOBF	NZ_CP016498	Conjugative
1858	JX515588.1	IncU,rep_cluster_1150	000212__CP012556_00176,000430__CP020850	MOBH	NC_018107_00109	MPF_F	NC_018107_00216,NC_018107_00101,NC_016980_00240,NC_023911_00309,NC_016980_00099,NC_018107_00235,NC_016980_00110	-	-	Conjugative
1859	JX548317.1	rep_cluster_1323	000642__JX548317	MOBP	NC_010579_00024	MPF_T	NC_010579_00023,NC_010579_00002,NC_010579_00004	-	-	Conjugative
1860	JX566767.1	rep_cluster_1778	001198__NC_010486_00001	MOBQ	NC_011411_00002	-	-	MOBQ,MOBQ	NC_010672,NC_025182	Mobilizable
1861	JX566768.1	ColRNAI_rep_cluster_1987	000019__CP000651_00005	MOBP,MOBP	NC_001848_00006,NC_013090_00004	-	-	MOBP	HQ328804	Mobilizable
1862	JX566769.1	ColRNAI_rep_cluster_1857	000008__AJ627566	MOBP	NC_019076_00002	-	-	MOBP	KU254578	Mobilizable
1863	JX566770.1	IncQ1,IncI1	000195__NC_013728_00014,000145__HE610900_00001	MOBP	NC_019097	MPF_I	NC_023290_00086,NC_015965_00072,NC_022267_00069,NC_019097_00085,NC_022267_00057,NC_019097_00056,NC_019111_00038,NC_019097_00075,NZ_CM001473_00069	MOBP	DQ916413	Conjugative
1864	JX569338.1	rep_cluster_333	001647__JX569338_00001	MOBV	NC_019426_00036	-	-	-	-	Mobilizable
1865	JX627580.1	rep_cluster_525	001900__CP015368_00113	-	-	-	-	-	-	Non-mobilizable
1866	JX627581.1	-	-	-	-	-	-	-	-	Non-mobilizable
1867	JX627582.1	-	-	-	-	-	-	-	-	Non-mobilizable
1868	JX627583.1	-	-	-	-	-	-	-	-	Non-mobilizable
1869	JX627737.1	IncFII,IncFIIA	000121__CP024805,000136__AP014877_00014	MOBF	NC_017627_00068	MPF_F	NC_013437_00116,NC_017054_00096,NC_008460_00107,NC_017639_00094,NC_022651_00077,NC_019094_00068,NC_010719_00097,NC_019094_00090,08-5333_00200,NC_010409_00124,NC_018966_00040,NC_007675_00027	MOBP	AP014804	Conjugative
1870	JX668987.1	rep_cluster_624	002074__JX668987	-	-	-	-	-	-	Non-mobilizable
1871	JX668988.1	rep_cluster_594	002021__JX668988	-	-	-	-	-	-	Non-mobilizable
1872	JX668989.1	rep_cluster_594	002023__JX668989	-	-	-	-	-	-	Non-mobilizable
1873	JX683454.1	rep_cluster_592	002019__JX683454_00001	MOBQ,MOBQ	NC_016814_00131,NC_002575_00134	MPF_T	NC_019555_00155,NC_002575_00131,NC_019555_00150	-	-	Conjugative
1874	JX827416.1	rep_cluster_1875	001311__EU715370_00012	MOBF,MOBP	NC_019255_00001,NC_019214_00002	-	-	-	-	Mobilizable
1875	JX843237.1	IncU	000211__KU963389_00011	-	-	-	-	-	-	Non-mobilizable
1876	JX843238.1	ColRNAI_rep_cluster_1291	000001__EU090225_00001	MOBQ	NC_019783_00003	-	-	-	-	Mobilizable
1877	JX847411.1	rep_cluster_1431	000769__NC_005793_00062	MOBP	NC_005793_00073	MPF_T	NC_019378_00008,NC_019378_00044,NC_019378_00006	-	-	Conjugative
1878	JX847602.1	rep_cluster_1213	000504__JX847602	-	-	-	-	-	-	Non-mobilizable
1879	JX847604.1	rep_cluster_644	002100__JX847604_00011	MOBV	NC_005076_00012	-	-	-	-	Mobilizable
1880	JX863070.1	rep_cluster_1092	000343__NC_015509_00001	MOBV	NC_015509_00005	-	-	-	-	Mobilizable
1881	JX891462.1	rep_cluster_1269	000582__NC_021250_00072	MOB_Unknown	JX891462	MPF_I	NC_021250_00078,NC_021250_00083,NC_021250_00075,NC_021250_00013,NC_021250_00033,NC_021250_00039,NC_021250_00079,NC_021250_00076	-	-	Conjugative
1882	JX898993.1	rep_cluster_1230	000530__NC_010626_00002	-	-	-	-	-	-	Non-mobilizable
1883	JX981514.1	IncX4	000224__NC_022105_00002	MOBP	NC_013718_00057	MPF_T	NC_013718_00045,NC_021079_00038,NC_013718_00044,NC_013718_00041	-	-	Conjugative
1884	JX982605.1	ColRNAI_rep_cluster_1956	000015__JX514065	MOBQ	NC_021523_00003	-	-	-	-	Mobilizable
1885	JX988621.1	rep_cluster_1254,IncL/M	000562__KT346360_00001,000148__NC_021488_00028	MOBP	NC_004464_00056	MPF_I	NC_005246_00057,NC_004464_00105,NC_004464_00073,NC_004464_00068,NC_004464_00066,NC_019344_00078,NC_005246_00069,NC_019063_00094,NC_019154_00069	-	-	Conjugative
1886	JX997935.2	IncFII,IncFIIA	000121__CP024805,000136__AP014877_00014	MOBF	NC_017627_00068	MPF_F	NC_019094_00090,NC_010719_00097,NC_010409_00124,NC_018966_00040,08-5333_00200,NC_017054_00096,NC_017639_00094,NC_019094_00068,NC_022651_00077,NC_008460_00107,NC_013437_00116,NC_007675_00027	MOBP	AP014804	Conjugative
1887	KC005723.1	rep_cluster_1379	000717__KC005723	-	-	-	-	-	-	Non-mobilizable
1888	KC019311.1	rep_cluster_1202	000492__KC019311_00003	MOBP	NC_019900_00006	-	-	-	-	Mobilizable
1889	KC020049.1	ColRNAI_rep_cluster_1987	000019__CP000651_00005	-	-	-	-	-	-	Non-mobilizable
1890	KC167328.1	rep_cluster_1425	000765__EU370687_00001	-	-	-	-	-	-	Non-mobilizable
1891	KC170278.1	rep_cluster_1183	000467__KC170278_00001	-	-	-	-	-	-	Non-mobilizable
1892	KC170279.1	IncP	000179__NC_001735_00020	MOBP	NC_001735_00050	MPF_T	NC_001735_00049,NC_008459_00022,NC_019318_00059,NC_004956_00085	MOBP	KU302802	Conjugative
1893	KC170280.1	IncN	000155__CP018649	MOBF	NC_015599_00019	MPF_T	NC_011617_00041,NC_008612_00190,NC_022375_00024,NC_009131_00030,NC_014368_00014,NC_007682_00044	MOBF	NZ_CP012928	Conjugative
1894	KC170281.1	IncU	000211__KU963389_00011	MOBP	NC_006143_00014	MPF_T	NC_006143_00024,NC_006143_00022,NC_006143_00027,NC_006143_00028,NC_006143_00021,NC_006143_00018	-	-	Conjugative
1895	KC170282.1	rep_cluster_744	002222__KC170282_00001	-	-	-	-	-	-	Non-mobilizable
1896	KC170283.1	rep_cluster_1242	000550__KC170283	-	-	MPF_T	NC_023907_00043,NC_023907_00079,NC_023907_00045	-	-	Non-mobilizable
1897	KC170284.1	IncU	000211__KU963389_00011	MOBP	NC_006143_00014	MPF_T	NC_006143_00024,NC_006143_00022,NC_006143_00018,NC_006143_00027,NC_006143_00021,NC_006143_00028	-	-	Conjugative
1898	KC170285.1	rep_cluster_224	001492__KC170285_00001	-	-	-	-	-	-	Non-mobilizable
1899	KC189475.1	rep_cluster_995	002480__NC_019220_00009	MOBQ	NC_020452_00007	MPF_T	NC_022242_00031	-	-	Conjugative
1900	KC206006.1	rep_cluster_155	000916__KC206006_00010	-	-	-	-	-	-	Non-mobilizable
1901	KC237287.1	ColRNAI_rep_cluster_1987	000019__CP000651_00005	-	-	-	-	-	-	Non-mobilizable
1902	KC237288.1	ColRNAI_rep_cluster_1987	000019__CP000651_00005	-	-	-	-	-	-	Non-mobilizable
1903	KC237289.1	ColRNAI_rep_cluster_1987	000019__CP000651_00005	-	-	-	-	-	-	Non-mobilizable
1904	KC255223.1	Inc13	000068__KC255223_00002	MOBV	NC_022993_00002	-	-	-	-	Mobilizable
1905	KC255224.1	-	-	-	-	-	-	-	-	Non-mobilizable
1906	KC286618.1	rep_cluster_1164	000444__AF244084_00005	MOBP	NC_020295_00001	-	-	-	-	Mobilizable
1907	KC291146.1	ColRNAI_rep_cluster_1987	000019__CP000651_00005	-	-	-	-	-	-	Non-mobilizable
1908	KC291147.1	rep_cluster_1164	000444__AF244084_00005	-	-	-	-	-	-	Non-mobilizable
1909	KC292503.1	rep_cluster_1046	000290__NC_019186_00001	-	-	-	-	-	-	Non-mobilizable
1910	KC306506.1	-	-	MOBP	NC_021808_00006	-	-	-	-	Mobilizable
1911	KC311431.1	IncX3	000221__NC_025130_00012	MOBP	NC_020552_00059	MPF_T	NC_019083_00030,NC_023277_00163,NC_017624_00009,NC_019157_00029,NC_019157_00030	-	-	Conjugative
1912	KC335143.1	IncL/M	000148__NC_021488_00028	MOBP	NC_004464_00056	MPF_I	NC_019063_00094,NC_005246_00069,NC_004464_00068,NC_019344_00078,NC_019154_00069,NC_004464_00105,NC_004464_00073,NC_005246_00057,NC_004464_00066	-	-	Conjugative
1913	KC340959.1	IncQ1,IncFIIA	000195__NC_013728_00014,000136__AP014877_00014	MOBP	NC_013728_00087	MPF_I	NC_012487_00131,NC_007365_00035,NC_007365_00033,NC_011754_00087,NC_011754_00109,NC_014843_00047,NC_022371_00084,NC_022992_00102,NC_022992_00098	MOBP	FR821780	Conjugative
1914	KC340960.1	IncQ1,IncFIIA	000195__NC_013728_00014,000136__AP014877_00014	MOBP	NC_013728_00087	MPF_I	NC_022992_00098,NC_011754_00087,NC_022371_00084,NC_007365_00035,NC_011754_00109,NC_007365_00033,NC_014843_00047,NC_012487_00131,NC_022992_00102	MOBP	FR821780	Conjugative
1915	KC354801.1	IncL/M	000148__NC_021488_00028	MOBP	NC_004464_00056	MPF_I	NC_004464_00105,NC_004464_00073,NC_019154_00069,NC_019344_00078,NC_004464_00068,NC_019063_00094,NC_005246_00069,NC_005246_00057,NC_004464_00066	-	-	Conjugative
1916	KC354802.1	IncX4	000224__NC_022105_00002	MOBP	NC_013718_00057	MPF_T	NC_013718_00041,NC_013718_00044,NC_021079_00038,NC_013718_00045	-	-	Conjugative
1917	KC405064.1	rep_cluster_337	001651__FJ947048	MOBP	NC_019361_00015	-	-	-	-	Mobilizable
1918	KC405065.1	rep_cluster_337	001651__FJ947048	MOBP	NC_019361_00015	-	-	-	-	Mobilizable
1919	KC405622.1	IncU,IncR	000210__KF623109_00045,000204__CP008701_00115	-	-	-	-	-	-	Non-mobilizable
1920	KC417494.1	-	-	MOBP	NZ_AFDA02000006_00006	-	-	MOBP	NC_013366	Mobilizable
1921	KC417495.1	-	-	-	-	-	-	-	-	Non-mobilizable
1922	KC456362.1	rep_cluster_1018,rep_cluster_282	000267__NC_021513_00007,001559__KC561137_00007	MOBP	NC_020237_00008	-	-	MOBV	NZ_CP009579	Mobilizable
1923	KC491194.1	rep_cluster_323	001637__KC491194_00001	-	-	-	-	-	-	Non-mobilizable
1924	KC491195.1	-	-	-	-	-	-	-	-	Non-mobilizable
1925	KC503911.1	-	-	MOBQ	NC_020818_00001	MPF_T	NC_019268_00036,NC_019268_00037,NC_019268_00038,NC_019268_00030,NC_019268_00026	MOBQ	NC_019342	Conjugative
1926	KC511628.1	ColRNAI_rep_cluster_1998	000028__KP099552	-	-	-	-	-	-	Non-mobilizable
1927	KC525245.1	rep_cluster_2003	001441__KC525245	-	-	-	-	-	-	Non-mobilizable
1928	KC540630.1	rep_cluster_1345	000663__EU574928_00010	-	-	-	-	-	-	Non-mobilizable
1929	KC542381.1	IncP	000168__NC_021210_00003	MOBQ	NC_021210_00009	-	-	-	-	Mobilizable
1930	KC542382.1	IncP	000166__KC542382_00002	-	-	-	-	-	-	Non-mobilizable
1931	KC542383.1	rep_cluster_743	002221__NC_021212_00002	MOBF	NC_021212_00024	MPF_T	NC_021212_00023,NC_019341_00054,NC_021212_00033,NC_021212_00030,NC_021212_00031,NC_021212_00036	-	-	Conjugative
1932	KC542384.1	rep_cluster_1723	001139__KC542384_00001	-	-	-	-	-	-	Non-mobilizable
1933	KC561053.1	rep_cluster_1744	001165__KC561053	MOBP	NC_021239_00006	-	-	-	-	Mobilizable
1934	KC561054.1	rep_cluster_1598	000972__NC_021240_00001	MOBQ	NC_021240_00008	-	-	-	-	Mobilizable
1935	KC561055.1	-	-	MOBP	NC_021241_00014	-	-	-	-	Mobilizable
1936	KC561137.1	rep_cluster_282	001559__KC561137_00007	MOBP	NC_020237_00008	-	-	MOBV	NZ_CP009579	Mobilizable
1937	KC609322.1	IncU	000211__KU963389_00011	-	-	-	-	-	-	Non-mobilizable
1938	KC609323.1	IncP	000172__KU578314_00001	MOBP	NC_003124_00014	-	-	-	-	Mobilizable
1939	KC663407.2	ColRNAI_rep_cluster_1987	000019__CP000651_00005	MOBP,MOBP	NC_001848_00006,NC_021293_00005	-	-	MOBP	HQ328804	Mobilizable
1940	KC686700.1	rep_cluster_1069	000315__CP022180_00010	-	-	-	-	-	-	Non-mobilizable
1941	KC687076.1	-	-	-	-	-	-	-	-	Non-mobilizable
1942	KC733807.1	rep_cluster_1717	001130__KC733807_00005	-	-	-	-	-	-	Non-mobilizable
1943	KC734560.1	rep_cluster_1403	000744__KC734560_00001	MOBP	NC_010675_00004	-	-	-	-	Mobilizable
1944	KC734561.1	rep_cluster_1049	000292__KC734561_00001	-	-	-	-	MOBP	NC_006663	Mobilizable
1945	KC734562.1	rep_cluster_1403	000744__KC734560_00001	MOBP	NC_010675_00004	-	-	-	-	Mobilizable
1946	KC734563.1	rep_cluster_1827	001247__NC_010875_00002	MOBV	NC_010875_00006	-	-	-	-	Mobilizable
1947	KC757416.2	IncL/M	000148__NC_021488_00028	MOBP	NC_004464_00056	MPF_I	NC_019063_00094,NC_005246_00057,NC_019154_00069,NC_004464_00066,NC_005246_00069,NC_004464_00068,NC_004464_00073,NC_019344_00078,NC_004464_00105	-	-	Conjugative
1948	KC757417.2	IncL/M,IncFII,IncFIA	000148__NC_021488_00028,000124__KP125893_00142,000093__KX023259_00112	MOBP,MOBF	NC_004464_00056,NC_021231_00058	MPF_F	NC_004464_00068,NC_019389_00080,NC_014312_00116,NC_021502_00131,NC_021502_00150,NC_019389_00068,NC_021654_00016,NC_004464_00066,NC_021502_00123,NC_019154_00069,NC_004464_00073,NC_019344_00078,NC_019165_00034,NC_005246_00057,NC_014312_00118,NC_014312_00128,NC_022609_00081,NC_019063_00094,NC_004464_00105,NC_019155_00032,NC_005246_00069	-	-	Conjugative
1949	KC771559.1	IncP	000179__NC_001735_00020	MOBP	NC_001735_00050	MPF_T	NC_004956_00085,NC_007353_00043,NC_008459_00022,NC_001735_00049	MOBP	LT174529	Conjugative
1950	KC788287.1	ColRNAI_rep_cluster_1857,rep_cluster_1018	000008__AJ627566,000268__U32369_00002	-	-	-	-	-	-	Non-mobilizable
1951	KC788405.1	IncI1,IncFIIA,IncFII,IncN	000144__CP015838_00058,000136__AP014877_00014,000121__CP024805,000155__CP018649	MOBF,MOBP,MOBF	NC_015599_00019,NC_019097,NC_011980_00044	MPF_I	NC_019097_00075,NC_022375_00024,NC_019097_00056,NC_022267_00057,NC_014615_00033,NC_022267_00069,NC_008460_00107,NC_019111_00038,NZ_CM001473_00069,NC_019097_00085,NC_023290_00086,NC_015965_00072	MOBF,MOBP	NZ_CP016498,JN253636	Conjugative
1952	KC812101.1	-	-	MOBP	NC_021572_00002	-	-	-	-	Mobilizable
1953	KC812102.1	rep_cluster_1628	001017__NC_013543_00012	-	-	-	-	-	-	Non-mobilizable
1954	KC812103.1	Inc11	000036__NC_012548_00002	-	-	-	-	-	-	Non-mobilizable
1955	KC818265.1	IncP	000158__KX966395_00001	-	-	-	-	-	-	Non-mobilizable
1956	KC845573.1	IncI2	000147__CP006264_00003	MOBP	NC_022520_00030	MPF_T	NC_019039_00052,NC_019039_00051,NC_019115_00018,NC_020270_00063,NC_020270_00058	-	-	Conjugative
1957	KC853434.1	IncX1	000215__KC853434_00019	-	-	MPF_T	NC_008612_00190,NC_007682_00044,NC_014368_00014,NC_011617_00041,NC_009131_00030	-	-	Non-mobilizable
1958	KC853435.1	IncFII,IncFIIA,IncFIB	000121__CP024805,000136__AP014877_00014,000095__NZ_CP014273_00094	MOBF	NC_011980_00044	MPF_F	NC_010409_00124,NC_019094_00090,NC_022651_00077	-	-	Conjugative
1959	KC853436.1	ColRNAI_rep_cluster_1857	000008__AJ627566	MOBP	NC_019076_00002	-	-	MOBP	KY421937	Mobilizable
1960	KC853437.1	ColRNAI_rep_cluster_1291	000001__EU090225_00001	MOBQ	NZ_AWFJ01000122_00007	-	-	MOBQ	DQ318958	Mobilizable
1961	KC853438.1	ColRNAI_rep_cluster_1857	000008__AJ627566	MOBP	NC_023328_00003	-	-	MOBP	NZ_CP015916	Mobilizable
1962	KC853439.1	IncQ1,IncI1	000195__NC_013728_00014,000145__HE610900_00001	MOBP	NC_019097	MPF_I	NC_019097_00056,NC_022267_00057	MOBP	JN253636	Conjugative
1963	KC871566.1	rep_cluster_1929	001368__NC_022074_00001	-	-	-	-	-	-	Non-mobilizable
1964	KC886366.1	ColRNAI_rep_cluster_1993	000024__JX133088	-	-	-	-	MOBP	AB027308	Mobilizable
1965	KC887916.2	IncFII,IncFIB,IncFII	000122__JQ418538,000101__NZ_CP012345_00042,000114__CP015527	MOBF	NC_021501_00073	MPF_F	NC_006323_00096,NC_006323_00105,NC_021501_00085,NC_009378_00101,NC_006323_00097,NC_021501_00076,NC_021501_00074,NC_021501_00084,NC_006323_00113,NC_021501_00097,NC_021501_00083	-	-	Conjugative
1966	KC887917.2	IncFII,IncFIB,IncFII	000122__JQ418538,000101__NZ_CP012345_00042,000114__CP015527	MOBF	NC_021501_00073	MPF_F	NC_021501_00097,NC_021501_00083,NC_006323_00097,NC_006323_00096,NC_021501_00085,NC_006323_00105,NC_006323_00113,NC_021501_00074,NC_021501_00076,NC_009378_00101,NC_021501_00084	-	-	Conjugative
1967	KC895877.1	rep_cluster_1205	000495__NC_022076_00001	-	-	-	-	-	-	Non-mobilizable
1968	KC895878.1	rep_cluster_1855	001286__NC_022077_00001	-	-	-	-	-	-	Non-mobilizable
1969	KC895984.1	rep_cluster_1118	000395__NC_023313_00001	MOBP	NC_023313_00003	-	-	-	-	Mobilizable
1970	KC920663.1	rep_cluster_1018,ColRNAI_rep_cluster_1857	000268__U32369_00002,000008__AJ627566	-	-	-	-	-	-	Non-mobilizable
1971	KC920664.1	ColRNAI_rep_cluster_1857,rep_cluster_1018	000008__AJ627566,000268__U32369_00002	-	-	-	-	-	-	Non-mobilizable
1972	KC935372.1	rep_cluster_585	001991__KC935372	-	-	-	-	-	-	Non-mobilizable
1973	KC954773.1	rep_cluster_570	001972__KC954773_00009	-	-	-	-	-	-	Non-mobilizable
1974	KC958437.1	IncN	000155__CP018649	MOBF	NC_015599_00019	MPF_T	NC_022375_00024,NC_008612_00190,NC_014368_00014,NC_009131_00030,NC_007682_00044,NC_011617_00041	MOBF	NZ_CP016498	Conjugative
1975	KC960485.1	IncN	000155__CP018649	MOBF	NC_015599_00019	MPF_T	NC_011617_00041,NC_007682_00044,NC_014368_00014,NC_008612_00190,NC_022375_00024,NC_009131_00030	MOBF	NZ_CP016035	Conjugative
1976	KC964605.1	IncP	000175__JQ004408_00022	MOBP	NC_019318_00039	MPF_T	NC_019318_00059,NC_019318_00058,NC_019318_00057,NC_019318_00040	MOBP	NC_017965	Conjugative
1977	KC964606.1	IncP	000175__JQ004408_00022	MOBP	NC_019318_00039	MPF_T	NC_019318_00058,NC_019318_00057,NC_019318_00040,NC_019318_00059	MOBP	NC_017965	Conjugative
1978	KC964607.1	IncP	000175__JQ004408_00022	MOBP	NC_019318_00039	MPF_T	NC_019318_00058,NC_019318_00059,NC_019318_00040,NC_019318_00057	MOBP	NC_017965	Conjugative
1979	KC991136.1	Inc11	000051__FJ374272_00004	-	-	-	-	-	-	Non-mobilizable
1980	KC999035.4	IncA/C2	000092__CP025470	MOBH	NC_012885_00072	MPF_F	NC_009140_00071,NC_023291_00077,NC_012885_00088,NC_012885_00083,NC_014170_00023,NC_012885_00167,NC_016974_00085,NC_012885_00091	-	-	Conjugative
1981	KF056330.2	IncA/C2,IncQ1	000092__CP025470,000195__NC_013728_00014	MOBH	NC_012885_00072	MPF_F	NC_014170_00023,NC_012885_00167,NC_009140_00071,NC_012885_00088,NC_012885_00083,NC_016974_00085,NC_023291_00077,NC_012885_00091	-	-	Conjugative
1982	KF152885.1	IncA/C2	000092__CP025470	MOBH	NC_012885_00072	MPF_F	NC_012885_00167,NC_023291_00077,NC_012885_00088,NC_009140_00071,NC_012885_00091,NC_014170_00023,NC_016974_00085,NC_012885_00083	MOBH	JQ319772	Conjugative
1983	KF192842.1	rep_cluster_896	002378__KF192842_00001	-	-	-	-	-	-	Non-mobilizable
1984	KF220658.1	-	-	-	-	-	-	-	-	Non-mobilizable
1985	KF250428.1	IncA/C2	000092__CP025470	MOBH	NC_012885_00072	MPF_F	NC_012885_00083,NC_023291_00077,NC_016974_00085,NC_012885_00088,NC_012885_00091,NC_014170_00023,NC_009140_00071,NC_012885_00167	MOBH	JQ319772	Conjugative
1986	KF278750.1	rep_cluster_554	001942__KF278750_00001	-	-	-	-	-	-	Non-mobilizable
1987	KF290377.1	IncI1	000145__HE610900_00001	MOBP	NC_019097	MPF_I	NC_019111_00038,NC_019097_00056,NC_023290_00086,NC_015965_00072,NC_019097_00075,NC_019097_00085,NC_022267_00069,NZ_CM001473_00069,NC_022267_00057	MOBP	HM021326	Conjugative
1988	KF290378.2	IncI1	000145__HE610900_00001	MOBP	NC_019097	MPF_I	NC_022267_00069,NC_019097_00085,NC_023290_00086,NC_015965_00072,NC_019097_00056,NZ_CM001473_00069,NC_022267_00057,NC_019097_00075,NC_019111_00038	MOBP	HM021326	Conjugative
1989	KF295828.1	rep_cluster_1506	000848__KX832927	MOBP	NC_022589_00035	MPF_F	NC_022589_00031,NC_022589_00020,NC_022589_00024,NC_022589_00025,NC_022589_00016,NC_022589_00004,NC_022589_00017,NC_022589_00022	-	-	Conjugative
1990	KF295829.1	IncFIB,IncFII	000097__NC_025166_00051,000124__KP125893_00142	MOBF	NC_021231_00058	MPF_F	NC_019165_00034,NC_022609_00070,NC_021502_00150,NC_022609_00081,NC_021502_00131,NC_014312_00118,NC_021654_00016,NC_011281_00082,NC_014312_00128,NC_022609_00095,NC_019389_00068,NC_014312_00116	-	-	Conjugative
1991	KF362121.2	IncQ1,IncFIA	000195__NC_013728_00014,000093__KX023259_00112	MOBP,MOBH	NC_011416_00039,NC_013365_00169	MPF_F	NC_019360_00256,NC_019360_00255,NC_002305_00120,NC_005211_00030,NC_002305_00127,NC_019360_00278,NC_009981_00239	-	-	Conjugative
1992	KF362122.2	IncFIA,IncQ1,IncX1	000093__KX023259_00112,000195__NC_013728_00014,000215__KC853434_00019	MOBP,MOBH,MOBP	NC_019096_00001,NC_013365_00169,NC_011416_00039	MPF_F	NC_019360_00255,NC_002305_00120,NC_019360_00256,NC_017624_00009,NC_023277_00163,NC_019046_00026,NC_002305_00127,NC_019360_00278,NC_009981_00239,NC_010860_00022,NC_005211_00030,NC_019067_00043	MOBP	EU164802	Conjugative
1993	KF364953.1	ColRNAI_rep_cluster_1956	000015__JX514065	-	-	-	-	-	-	Non-mobilizable
1994	KF364954.1	ColRNAI_rep_cluster_1956	000015__JX514065	-	-	-	-	-	-	Non-mobilizable
1995	KF364955.1	ColRNAI_rep_cluster_1956	000015__JX514065	-	-	-	-	-	-	Non-mobilizable
1996	KF364956.1	ColRNAI_rep_cluster_1956	000015__JX514065	-	-	-	-	-	-	Non-mobilizable
1997	KF364957.1	ColRNAI_rep_cluster_1956	000015__JX514065	-	-	-	-	-	-	Non-mobilizable
1998	KF365913.1	rep_cluster_1454	000795__AB615353	-	-	-	-	-	-	Non-mobilizable
1999	KF418775.1	-	-	-	-	MPF_F	NC_010070_00092,NC_010070_00105,NC_010070_00083	-	-	Non-mobilizable
[truncated: 10,085 more rows]
